# Supplementary material for: Broad functional profiling of fission yeast proteins using phenomics and machine learning
Source: bioRxiv preprint, doi:10.1101/2023.04.05.535764, version 3 (2023-07-17)
Supplement: Supplementary File 1 [file 535764_file02.xlsx]

## Sheet: Description of data
Supplementary file 2: Data for NET-FF predictions and integrated analyses
Sheet	Description
NETFF high scores	GO predictions after filtering for high confidence >0.7
NETFF filtered	GO predictions after filtering for high scores and high information content
NETFF priority unstudied	GO predictions with high scores and information content for priority unstudied genes
NETFF novel predictions	GO predictions with high confidence and high information content not available in PomBase
NETFF-HGOGO-HPHEPHE-BP	NET-FF Biological Process Ontology gene pairs with high GOGO and PHEPHE scores >0.3
NETFF-HGOGO-HPHEPHE-MF	NET-FF Molecular Function Ontology gene pairs with high GOGO and PHEPHE scores >0.3
PB-HGOGO-HPHEPHE-BP	PomBase Biological Process Ontology gene pairs with high GOGO and PHEPHE scores >0.3
PB-HGOGO-HPHEPHE-MF	PomBase Molecular Function Ontology gene pairs with high GOGO and PHEPHE scores >0.3
312 selected genes	Genes with predictions for selected cellular processes compared with PomBase annotations
Selected predictions confirmed	Genes with predictions for selected cellular processes confirmed by our phenotyping data
5 priority unstudied	Five priority unstudied genes among the 148 genes associated with novel predictions
Cytoscape clusters	Gene list for the Cytoscape phenotype-correlation network clusters, along with notes on some enrichments
Priority unknowns in Cytoscape	Lists of genes linked with priority unknown genes in Cytoscape clusters
GOGO enrichments	GO term enrichments among high-GOGO gene pairs within clusters based on PomBase, NET-FF and/or Combined annotations

## Sheet: NETFF high scores
gene_id	gene_name	go_id	go_name	go_namespace	probability	probability_ml	probability_caft	information_content	pombase_evidence_code	is_priority_unstudied_gene	is_conserved_in_vertebrates	is_unknown_function_gene
SPBC30D10.10c	serine/threonine protein kinase Tor1	GO:0022402	cell cycle process	BP	1	0.507128	1	3.7611	experimental	FALSE	TRUE	FALSE
SPAC27F1.09c	U2 snRNP-associated protein Sap155	GO:0060255	regulation of macromolecule metabolic process	BP	1	0.112016	1	3.55445		FALSE	TRUE	FALSE
SPAC27F1.09c	U2 snRNP-associated protein Sap155	GO:0010468	regulation of gene expression	BP	1	0.101833	1	3.8283		FALSE	TRUE	FALSE
SPCC188.02	protein phosphatase PP2A regulatory subunit B-56 Par1	GO:0006996	organelle organization	BP	1	0.205703	1	4.03836	experimental	FALSE	TRUE	FALSE
SPCC188.02	protein phosphatase PP2A regulatory subunit B-56 Par1	GO:0016043	cellular component organization	BP	1	0.307536	1	3.17343	experimental	FALSE	TRUE	FALSE
SPAC56E4.03	aromatic aminotransferase (predicted)	GO:1901605	alpha-amino acid metabolic process	BP	1	0.519348	1	5.17073		FALSE	TRUE	FALSE
SPBC1271.10c	transmembrane transporter (predicted)	GO:0006812	cation transport	BP	1	0.268839	1	5.38532		FALSE	FALSE	FALSE
SPBC1271.10c	transmembrane transporter (predicted)	GO:0006811	ion transport	BP	1	0.266802	1	4.86602		FALSE	FALSE	FALSE
SPBC1271.10c	transmembrane transporter (predicted)	GO:0071702	organic substance transport	BP	1	0.342159	1	4.15874		FALSE	FALSE	FALSE
SPBC1773.13	aromatic aminotransferase (predicted)	GO:1901605	alpha-amino acid metabolic process	BP	1	0.232179	1	5.17073		FALSE	TRUE	FALSE
SPCC569.07	aromatic aminotransferase (predicted)	GO:1901605	alpha-amino acid metabolic process	BP	1	0.236253	1	5.17073		FALSE	TRUE	FALSE
SPBC1348.05	transmembrane transporter (predicted)	GO:0006812	cation transport	BP	1	0.244399	1	5.38532		FALSE	FALSE	FALSE
SPBC1348.05	transmembrane transporter (predicted)	GO:0034220	ion transmembrane transport	BP	1	0.421589	1	4.98698		FALSE	FALSE	FALSE
SPBC1348.05	transmembrane transporter (predicted)	GO:0006811	ion transport	BP	1	0.311609	1	4.86602		FALSE	FALSE	FALSE
SPBC1348.05	transmembrane transporter (predicted)	GO:0055085	transmembrane transport	BP	1	0.295316	1	4.56264	curated	FALSE	FALSE	FALSE
SPBC1348.05	transmembrane transporter (predicted)	GO:0098655	cation transmembrane transport	BP	1	0.305499	1	5.46271		FALSE	FALSE	FALSE
SPBPB2B2.16c	transmembrane transporter (predicted)	GO:0006812	cation transport	BP	1	0.224033	1	5.38532		FALSE	FALSE	FALSE
SPBPB2B2.16c	transmembrane transporter (predicted)	GO:0034220	ion transmembrane transport	BP	1	0.464358	1	4.98698		FALSE	FALSE	FALSE
SPBPB2B2.16c	transmembrane transporter (predicted)	GO:0006811	ion transport	BP	1	0.321792	1	4.86602		FALSE	FALSE	FALSE
SPBPB2B2.16c	transmembrane transporter (predicted)	GO:0055085	transmembrane transport	BP	1	0.348269	1	4.56264	curated	FALSE	FALSE	FALSE
SPBPB2B2.16c	transmembrane transporter (predicted)	GO:0098655	cation transmembrane transport	BP	1	0.162933	1	5.46271		FALSE	FALSE	FALSE
SPAC750.02c	transmembrane transporter (predicted)	GO:0006812	cation transport	BP	1	0.289206	1	5.38532		FALSE	FALSE	FALSE
SPAC750.02c	transmembrane transporter (predicted)	GO:0034220	ion transmembrane transport	BP	1	0.486762	1	4.98698		FALSE	FALSE	FALSE
SPAC750.02c	transmembrane transporter (predicted)	GO:0006811	ion transport	BP	1	0.472505	1	4.86602		FALSE	FALSE	FALSE
SPAC750.02c	transmembrane transporter (predicted)	GO:0055085	transmembrane transport	BP	1	0.386965	1	4.56264	curated	FALSE	FALSE	FALSE
SPAC750.02c	transmembrane transporter (predicted)	GO:0098655	cation transmembrane transport	BP	1	0.486762	1	5.46271		FALSE	FALSE	FALSE
SPAC23C4.02	actin binding protein, coronin Crn1	GO:0032970	regulation of actin filament-based process	BP	1	0.171079	1	5.89438		FALSE	TRUE	FALSE
SPAC23C4.02	actin binding protein, coronin Crn1	GO:0065008	regulation of biological quality	BP	1	0.281059	1	4.49708		FALSE	TRUE	FALSE
SPAC23C4.02	actin binding protein, coronin Crn1	GO:0033043	regulation of organelle organization	BP	1	0.164969	1	4.60317		FALSE	TRUE	FALSE
SPAC23C4.02	actin binding protein, coronin Crn1	GO:0048519	negative regulation of biological process	BP	1	0.160896	1	3.83054		FALSE	TRUE	FALSE
SPAC23C4.02	actin binding protein, coronin Crn1	GO:0051493	regulation of cytoskeleton organization	BP	1	0.187373	1	5.77758		FALSE	TRUE	FALSE
SPAC23C4.02	actin binding protein, coronin Crn1	GO:0016043	cellular component organization	BP	1	0.501018	1	3.17343		FALSE	TRUE	FALSE
SPAC23C4.02	actin binding protein, coronin Crn1	GO:0044087	regulation of cellular component biogenesis	BP	1	0.175153	1	5.45128		FALSE	TRUE	FALSE
SPAC23C4.02	actin binding protein, coronin Crn1	GO:0048523	negative regulation of cellular process	BP	1	0.156823	1	4.08943		FALSE	TRUE	FALSE
SPAC23C4.02	actin binding protein, coronin Crn1	GO:0051128	regulation of cellular component organization	BP	1	0.276986	1	4.49927		FALSE	TRUE	FALSE
SPAC23C4.02	actin binding protein, coronin Crn1	GO:0050794	regulation of cellular process	BP	1	0.480652	1	2.8982		FALSE	TRUE	FALSE
SPAC23C4.02	actin binding protein, coronin Crn1	GO:0032956	regulation of actin cytoskeleton organization	BP	1	0.124236	1	5.92129		FALSE	TRUE	FALSE
SPAC23C4.02	actin binding protein, coronin Crn1	GO:0048518	positive regulation of biological process	BP	1	0.256619	1	3.96761		FALSE	TRUE	FALSE
SPAC23C4.02	actin binding protein, coronin Crn1	GO:0048522	positive regulation of cellular process	BP	1	0.234216	1	3.98189		FALSE	TRUE	FALSE
SPAC23C4.02	actin binding protein, coronin Crn1	GO:0010638	positive regulation of organelle organization	BP	1	0.181263	1	5.54659		FALSE	TRUE	FALSE
SPAC23C4.02	actin binding protein, coronin Crn1	GO:0051130	positive regulation of cellular component organization	BP	1	0.12831	1	5.36427		FALSE	TRUE	FALSE
SPAC23C4.02	actin binding protein, coronin Crn1	GO:0097435	supramolecular fiber organization	BP	1	0.203666	1	6.0368		FALSE	TRUE	FALSE
SPAC23C4.02	actin binding protein, coronin Crn1	GO:0051641	cellular localization	BP	1	0.244399	1	3.67383		FALSE	TRUE	FALSE
SPAC23C4.02	actin binding protein, coronin Crn1	GO:0051179	localization	BP	1	0.415479	1	3.1988		FALSE	TRUE	FALSE
SPBC3F6.01c	TPR repeat serine/threonine protein phosphatase (predicted)	GO:0006793	phosphorus metabolic process	BP	1	0.130346	1	4.53955		FALSE	TRUE	FALSE
SPCC4B3.05c	uroporphyrinogen decarboxylase Hem12 (predicted)	GO:0051186	obsolete cofactor metabolic process	BP	1	0.144603	1	10.6218		FALSE	TRUE	FALSE
SPAC3A11.09	plasma membrane sodium ion/proton antiporter Sod22	GO:0006873	cellular ion homeostasis	BP	1	0.162933	1	6.13313	automatic	FALSE	FALSE	FALSE
SPAC3A11.09	plasma membrane sodium ion/proton antiporter Sod22	GO:0048878	chemical homeostasis	BP	1	0.112016	1	6.00665	automatic	FALSE	FALSE	FALSE
SPAC3A11.09	plasma membrane sodium ion/proton antiporter Sod22	GO:0019725	cellular homeostasis	BP	1	0.10998	1	5.90327	automatic	FALSE	FALSE	FALSE
SPAC3A11.09	plasma membrane sodium ion/proton antiporter Sod22	GO:0055082	cellular chemical homeostasis	BP	1	0.124236	1	6.09998	automatic	FALSE	FALSE	FALSE
SPAC3A11.09	plasma membrane sodium ion/proton antiporter Sod22	GO:0042592	homeostatic process	BP	1	0.181263	1	5.40141	automatic	FALSE	FALSE	FALSE
SPAC3A11.09	plasma membrane sodium ion/proton antiporter Sod22	GO:0065008	regulation of biological quality	BP	1	0.221996	1	4.49708	automatic	FALSE	FALSE	FALSE
SPAP8A3.07c	phospho-2-dehydro-3-deoxyheptonate aldolase (predicted)	GO:1901362	organic cyclic compound biosynthetic process	BP	1	0.181263	1	4.35078	automatic	FALSE	FALSE	FALSE
SPAP8A3.07c	phospho-2-dehydro-3-deoxyheptonate aldolase (predicted)	GO:1901566	organonitrogen compound biosynthetic process	BP	1	0.376782	1	3.94847	automatic	FALSE	FALSE	FALSE
SPAP8A3.07c	phospho-2-dehydro-3-deoxyheptonate aldolase (predicted)	GO:0006520	cellular amino acid metabolic process	BP	1	0.279022	1	4.94844	automatic	FALSE	FALSE	FALSE
SPAP8A3.07c	phospho-2-dehydro-3-deoxyheptonate aldolase (predicted)	GO:0008652	cellular amino acid biosynthetic process	BP	1	0.189409	1	5.57191	automatic	FALSE	FALSE	FALSE
SPAP8A3.07c	phospho-2-dehydro-3-deoxyheptonate aldolase (predicted)	GO:0019438	aromatic compound biosynthetic process	BP	1	0.142566	1	4.48404	automatic	FALSE	FALSE	FALSE
SPAC24H6.10c	phospho-2-dehydro-3-deoxyheptonate aldolase (predicted)	GO:1901362	organic cyclic compound biosynthetic process	BP	1	0.164969	1	4.35078	automatic	FALSE	FALSE	FALSE
SPAC24H6.10c	phospho-2-dehydro-3-deoxyheptonate aldolase (predicted)	GO:1901566	organonitrogen compound biosynthetic process	BP	1	0.393075	1	3.94847	automatic	FALSE	FALSE	FALSE
SPAC24H6.10c	phospho-2-dehydro-3-deoxyheptonate aldolase (predicted)	GO:0006520	cellular amino acid metabolic process	BP	1	0.279022	1	4.94844	automatic	FALSE	FALSE	FALSE
SPAC24H6.10c	phospho-2-dehydro-3-deoxyheptonate aldolase (predicted)	GO:0008652	cellular amino acid biosynthetic process	BP	1	0.114053	1	5.57191	automatic	FALSE	FALSE	FALSE
SPAC24H6.10c	phospho-2-dehydro-3-deoxyheptonate aldolase (predicted)	GO:0019438	aromatic compound biosynthetic process	BP	1	0.136456	1	4.48404	automatic	FALSE	FALSE	FALSE
SPCC1020.06c	transaldolase (predicted)	GO:0055114	oxidation-reduction process	BP	1	0.301426	1	6.21505	curated	FALSE	TRUE	FALSE
SPBC16G5.09	Golgi serine carboxypeptidase (predicted)	GO:0050794	regulation of cellular process	BP	1	0.171079	1	2.8982		FALSE	TRUE	FALSE
SPCC1682.09c	mitochondrial carrier, guanine nucleotide Ggc1 (predicted)	GO:0016043	cellular component organization	BP	1	0.152749	1	3.17343		FALSE	TRUE	FALSE
SPAC29B12.01	SNF2 family ATP-dependent 3' to 5' DNA helicase Ino80	GO:0045892	negative regulation of transcription, DNA-templated	BP	1	0.232179	1	5.42327		FALSE	TRUE	FALSE
SPAC29B12.01	SNF2 family ATP-dependent 3' to 5' DNA helicase Ino80	GO:0009892	negative regulation of metabolic process	BP	1	0.150713	1	4.36986		FALSE	TRUE	FALSE
SPAC29B12.01	SNF2 family ATP-dependent 3' to 5' DNA helicase Ino80	GO:1902679	negative regulation of RNA biosynthetic process	BP	1	0.162933	1	5.42327		FALSE	TRUE	FALSE
SPAC29B12.01	SNF2 family ATP-dependent 3' to 5' DNA helicase Ino80	GO:2000113	negative regulation of cellular macromolecule biosynthetic process	BP	1	0.179226	1	5.10834		FALSE	TRUE	FALSE
SPAC29B12.01	SNF2 family ATP-dependent 3' to 5' DNA helicase Ino80	GO:0048519	negative regulation of biological process	BP	1	0.260692	1	3.83054		FALSE	TRUE	FALSE
SPAC29B12.01	SNF2 family ATP-dependent 3' to 5' DNA helicase Ino80	GO:0031324	negative regulation of cellular metabolic process	BP	1	0.268839	1	4.84721		FALSE	TRUE	FALSE
SPAC29B12.01	SNF2 family ATP-dependent 3' to 5' DNA helicase Ino80	GO:0009890	negative regulation of biosynthetic process	BP	1	0.205703	1	5.04204		FALSE	TRUE	FALSE
SPAC29B12.01	SNF2 family ATP-dependent 3' to 5' DNA helicase Ino80	GO:0051172	negative regulation of nitrogen compound metabolic process	BP	1	0.238289	1	5.01229		FALSE	TRUE	FALSE
SPAC29B12.01	SNF2 family ATP-dependent 3' to 5' DNA helicase Ino80	GO:0010629	negative regulation of gene expression	BP	1	0.132383	1	4.67112		FALSE	TRUE	FALSE
SPAC29B12.01	SNF2 family ATP-dependent 3' to 5' DNA helicase Ino80	GO:0051253	negative regulation of RNA metabolic process	BP	1	0.107943	1	5.38002		FALSE	TRUE	FALSE
SPAC29B12.01	SNF2 family ATP-dependent 3' to 5' DNA helicase Ino80	GO:0048523	negative regulation of cellular process	BP	1	0.232179	1	4.08943		FALSE	TRUE	FALSE
SPAC29B12.01	SNF2 family ATP-dependent 3' to 5' DNA helicase Ino80	GO:0045934	negative regulation of nucleobase-containing compound metabolic process	BP	1	0.236253	1	5.21459		FALSE	TRUE	FALSE
SPAC29B12.01	SNF2 family ATP-dependent 3' to 5' DNA helicase Ino80	GO:1903507	negative regulation of nucleic acid-templated transcription	BP	1	0.230143	1	5.42327		FALSE	TRUE	FALSE
SPAC29B12.01	SNF2 family ATP-dependent 3' to 5' DNA helicase Ino80	GO:0031327	negative regulation of cellular biosynthetic process	BP	1	0.221996	1	5.04204		FALSE	TRUE	FALSE
SPAC29B12.01	SNF2 family ATP-dependent 3' to 5' DNA helicase Ino80	GO:0010558	negative regulation of macromolecule biosynthetic process	BP	1	0.199593	1	5.10834		FALSE	TRUE	FALSE
SPAC29B12.01	SNF2 family ATP-dependent 3' to 5' DNA helicase Ino80	GO:0010605	negative regulation of macromolecule metabolic process	BP	1	0.234216	1	4.41117		FALSE	TRUE	FALSE
SPCC1322.14c	vacuolar transporter chaperone (VTC) complex subunit (predicted)	GO:0050794	regulation of cellular process	BP	1	0.185336	1	2.8982		FALSE	FALSE	FALSE
SPAC23C11.16	Polo kinase Plo1	GO:0016043	cellular component organization	BP	1	0.323829	1	3.17343	experimental	FALSE	TRUE	FALSE
SPAC23C11.16	Polo kinase Plo1	GO:0065008	regulation of biological quality	BP	1	0.250509	1	4.49708	experimental	FALSE	TRUE	FALSE
SPAC23C11.16	Polo kinase Plo1	GO:0035556	intracellular signal transduction	BP	1	0.372709	1	5.19242	experimental	FALSE	TRUE	FALSE
SPAC23C11.16	Polo kinase Plo1	GO:0007165	signal transduction	BP	1	0.539715	1	4.83487	experimental	FALSE	TRUE	FALSE
SPAC19D5.01	tyrosine phosphatase Pyp2	GO:1902749	regulation of cell cycle G2/M phase transition	BP	1	0.101833	1	5.80148	experimental	FALSE	TRUE	FALSE
SPAC19D5.01	tyrosine phosphatase Pyp2	GO:1901990	regulation of mitotic cell cycle phase transition	BP	1	0.112016	1	5.06494	experimental	FALSE	TRUE	FALSE
SPAC19D5.01	tyrosine phosphatase Pyp2	GO:0010564	regulation of cell cycle process	BP	1	0.138493	1	4.45635	experimental	FALSE	TRUE	FALSE
SPAC19D5.01	tyrosine phosphatase Pyp2	GO:0051726	regulation of cell cycle	BP	1	0.154786	1	4.33391	experimental	FALSE	TRUE	FALSE
SPAC19D5.01	tyrosine phosphatase Pyp2	GO:0051716	cellular response to stimulus	BP	1	0.152749	1	4.04948	experimental	FALSE	TRUE	FALSE
SPAC19D5.01	tyrosine phosphatase Pyp2	GO:0050896	response to stimulus	BP	1	0.130346	1	4.04113	experimental	FALSE	TRUE	FALSE
SPAC3H8.02	sec14 cytosolic factor family, phospholipid-intermembrane transfer protein Csr102 (predicted)	GO:0050794	regulation of cellular process	BP	1	0.158859	1	2.8982		FALSE	TRUE	FALSE
SPAC3H8.02	sec14 cytosolic factor family, phospholipid-intermembrane transfer protein Csr102 (predicted)	GO:0051641	cellular localization	BP	1	0.217923	1	3.67383		FALSE	TRUE	FALSE
SPAC3H8.02	sec14 cytosolic factor family, phospholipid-intermembrane transfer protein Csr102 (predicted)	GO:0071705	nitrogen compound transport	BP	1	0.10998	1	4.27088		FALSE	TRUE	FALSE
SPAC3H8.02	sec14 cytosolic factor family, phospholipid-intermembrane transfer protein Csr102 (predicted)	GO:0034613	cellular protein localization	BP	1	0.10998	1	4.47758		FALSE	TRUE	FALSE
SPAC3H8.02	sec14 cytosolic factor family, phospholipid-intermembrane transfer protein Csr102 (predicted)	GO:0016192	vesicle-mediated transport	BP	1	0.114053	1	4.73012		FALSE	TRUE	FALSE
SPAC3H8.02	sec14 cytosolic factor family, phospholipid-intermembrane transfer protein Csr102 (predicted)	GO:0042886	amide transport	BP	1	0.105906	1	4.6328		FALSE	TRUE	FALSE
SPAC3H8.02	sec14 cytosolic factor family, phospholipid-intermembrane transfer protein Csr102 (predicted)	GO:0033036	macromolecule localization	BP	1	0.13442	1	4.13408	curated	FALSE	TRUE	FALSE
SPAC3H8.02	sec14 cytosolic factor family, phospholipid-intermembrane transfer protein Csr102 (predicted)	GO:0008104	protein localization	BP	1	0.114053	1	4.14326		FALSE	TRUE	FALSE
SPAC26F1.10c	tyrosine phosphatase Pyp1	GO:0010389	regulation of G2/M transition of mitotic cell cycle	BP	1	0.148676	1	5.82598	experimental	FALSE	TRUE	FALSE
SPAC26F1.10c	tyrosine phosphatase Pyp1	GO:1902749	regulation of cell cycle G2/M phase transition	BP	1	0.112016	1	5.80148	experimental	FALSE	TRUE	FALSE
SPAC26F1.10c	tyrosine phosphatase Pyp1	GO:1901990	regulation of mitotic cell cycle phase transition	BP	1	0.164969	1	5.06494	experimental	FALSE	TRUE	FALSE
SPAC26F1.10c	tyrosine phosphatase Pyp1	GO:0010564	regulation of cell cycle process	BP	1	0.221996	1	4.45635	experimental	FALSE	TRUE	FALSE
SPAC26F1.10c	tyrosine phosphatase Pyp1	GO:0051726	regulation of cell cycle	BP	1	0.179226	1	4.33391	experimental	FALSE	TRUE	FALSE
SPAC26F1.10c	tyrosine phosphatase Pyp1	GO:0007346	regulation of mitotic cell cycle	BP	1	0.112016	1	4.64288	experimental	FALSE	TRUE	FALSE
SPAC26F1.10c	tyrosine phosphatase Pyp1	GO:1901987	regulation of cell cycle phase transition	BP	1	0.138493	1	5.005	experimental	FALSE	TRUE	FALSE
SPAC26F1.10c	tyrosine phosphatase Pyp1	GO:0051716	cellular response to stimulus	BP	1	0.132383	1	4.04948	experimental	FALSE	TRUE	FALSE
SPAC26F1.10c	tyrosine phosphatase Pyp1	GO:0050896	response to stimulus	BP	1	0.114053	1	4.04113	experimental	FALSE	TRUE	FALSE
SPAC16.03c	dihydroorotase Ura2	GO:0055086	nucleobase-containing small molecule metabolic process	BP	1	0.150713	1	5.04582	automatic	FALSE	FALSE	FALSE
SPAC16.03c	dihydroorotase Ura2	GO:0044271	cellular nitrogen compound biosynthetic process	BP	1	0.260692	1	3.90396	automatic	FALSE	FALSE	FALSE
SPAC16.03c	dihydroorotase Ura2	GO:1901362	organic cyclic compound biosynthetic process	BP	1	0.232179	1	4.35078	automatic	FALSE	FALSE	FALSE
SPAC16.03c	dihydroorotase Ura2	GO:0044281	small molecule metabolic process	BP	1	0.460285	1	3.83054	automatic	FALSE	FALSE	FALSE
SPAC16.03c	dihydroorotase Ura2	GO:0018130	heterocycle biosynthetic process	BP	1	0.209776	1	4.44798	automatic	FALSE	FALSE	FALSE
SPAC16.03c	dihydroorotase Ura2	GO:1901566	organonitrogen compound biosynthetic process	BP	1	0.327902	1	3.94847	automatic	FALSE	FALSE	FALSE
SPAC16.03c	dihydroorotase Ura2	GO:0006796	phosphate-containing compound metabolic process	BP	1	0.10387	1	4.57439	automatic	FALSE	FALSE	FALSE
SPAC16.03c	dihydroorotase Ura2	GO:0034654	nucleobase-containing compound biosynthetic process	BP	1	0.1222	1	4.71913	automatic	FALSE	FALSE	FALSE
SPAC16.03c	dihydroorotase Ura2	GO:0019438	aromatic compound biosynthetic process	BP	1	0.138493	1	4.48404	automatic	FALSE	FALSE	FALSE
SPCC777.13	retromer complex subunit Vps35	GO:0006886	intracellular protein transport	BP	1	0.11609	1	4.76669	experimental	FALSE	TRUE	FALSE
SPAC589.09	sec14 cytosolic factor family, phospholipid-intermembrane transfer protein Csr1 (predicted)	GO:0050794	regulation of cellular process	BP	1	0.14664	1	2.8982		FALSE	TRUE	FALSE
SPAC589.09	sec14 cytosolic factor family, phospholipid-intermembrane transfer protein Csr1 (predicted)	GO:0048193	Golgi vesicle transport	BP	1	0.158859	1	5.60449		FALSE	TRUE	FALSE
SPAC589.09	sec14 cytosolic factor family, phospholipid-intermembrane transfer protein Csr1 (predicted)	GO:0045184	establishment of protein localization	BP	1	0.118126	1	4.68952		FALSE	TRUE	FALSE
SPAC589.09	sec14 cytosolic factor family, phospholipid-intermembrane transfer protein Csr1 (predicted)	GO:0015031	protein transport	BP	1	0.10998	1	4.73012		FALSE	TRUE	FALSE
SPAC589.09	sec14 cytosolic factor family, phospholipid-intermembrane transfer protein Csr1 (predicted)	GO:0051641	cellular localization	BP	1	0.260692	1	3.67383		FALSE	TRUE	FALSE
SPAC589.09	sec14 cytosolic factor family, phospholipid-intermembrane transfer protein Csr1 (predicted)	GO:0071705	nitrogen compound transport	BP	1	0.10387	1	4.27088		FALSE	TRUE	FALSE
SPAC589.09	sec14 cytosolic factor family, phospholipid-intermembrane transfer protein Csr1 (predicted)	GO:0016192	vesicle-mediated transport	BP	1	0.236253	1	4.73012		FALSE	TRUE	FALSE
SPAC589.09	sec14 cytosolic factor family, phospholipid-intermembrane transfer protein Csr1 (predicted)	GO:0042886	amide transport	BP	1	0.11609	1	4.6328		FALSE	TRUE	FALSE
SPAC589.09	sec14 cytosolic factor family, phospholipid-intermembrane transfer protein Csr1 (predicted)	GO:0033036	macromolecule localization	BP	1	0.142566	1	4.13408	curated	FALSE	TRUE	FALSE
SPAC589.09	sec14 cytosolic factor family, phospholipid-intermembrane transfer protein Csr1 (predicted)	GO:0008104	protein localization	BP	1	0.162933	1	4.14326		FALSE	TRUE	FALSE
SPCC777.03c	nifs homolog, possible cysteine desulfurase	GO:0006790	sulfur compound metabolic process	BP	1	0.209776	1	5.53417		FALSE	FALSE	TRUE
SPCC777.03c	nifs homolog, possible cysteine desulfurase	GO:0044281	small molecule metabolic process	BP	1	0.309572	1	3.83054		FALSE	FALSE	TRUE
SPCC777.03c	nifs homolog, possible cysteine desulfurase	GO:0044283	small molecule biosynthetic process	BP	1	0.154786	1	4.73844		FALSE	FALSE	TRUE
SPCC777.03c	nifs homolog, possible cysteine desulfurase	GO:0043436	oxoacid metabolic process	BP	1	0.232179	1	4.4949		FALSE	FALSE	TRUE
SPCC777.03c	nifs homolog, possible cysteine desulfurase	GO:0046394	carboxylic acid biosynthetic process	BP	1	0.12831	1	5.22814		FALSE	FALSE	TRUE
SPCC777.03c	nifs homolog, possible cysteine desulfurase	GO:0006082	organic acid metabolic process	BP	1	0.291242	1	4.49054		FALSE	FALSE	TRUE
SPCC777.03c	nifs homolog, possible cysteine desulfurase	GO:1901566	organonitrogen compound biosynthetic process	BP	1	0.205703	1	3.94847		FALSE	FALSE	TRUE
SPCC777.03c	nifs homolog, possible cysteine desulfurase	GO:0006520	cellular amino acid metabolic process	BP	1	0.124236	1	4.94844		FALSE	FALSE	TRUE
SPCC777.03c	nifs homolog, possible cysteine desulfurase	GO:0044271	cellular nitrogen compound biosynthetic process	BP	1	0.187373	1	3.90396		FALSE	FALSE	TRUE
SPCC777.03c	nifs homolog, possible cysteine desulfurase	GO:0019752	carboxylic acid metabolic process	BP	1	0.226069	1	4.5103		FALSE	FALSE	TRUE
SPBC29A10.10c	ATP-dependent RNA helicase Dbl8	GO:0006355	regulation of transcription, DNA-templated	BP	1	0.452138	1	4.19205		FALSE	TRUE	FALSE
SPBC29A10.10c	ATP-dependent RNA helicase Dbl8	GO:0051252	regulation of RNA metabolic process	BP	1	0.401222	1	4.14479		FALSE	TRUE	FALSE
SPBC29A10.10c	ATP-dependent RNA helicase Dbl8	GO:1903506	regulation of nucleic acid-templated transcription	BP	1	0.421589	1	4.18242		FALSE	TRUE	FALSE
SPBC29A10.10c	ATP-dependent RNA helicase Dbl8	GO:0019219	regulation of nucleobase-containing compound metabolic process	BP	1	0.468432	1	3.97408		FALSE	TRUE	FALSE
SPBC29A10.10c	ATP-dependent RNA helicase Dbl8	GO:0051171	regulation of nitrogen compound metabolic process	BP	1	0.494908	1	3.77908		FALSE	TRUE	FALSE
SPBC29A10.10c	ATP-dependent RNA helicase Dbl8	GO:2001141	regulation of RNA biosynthetic process	BP	1	0.11609	1	4.18082		FALSE	TRUE	FALSE
SPBC29A10.10c	ATP-dependent RNA helicase Dbl8	GO:0019222	regulation of metabolic process	BP	1	0.354379	1	3.51189		FALSE	TRUE	FALSE
SPBC29A10.10c	ATP-dependent RNA helicase Dbl8	GO:0050794	regulation of cellular process	BP	1	0.527495	1	2.8982		FALSE	TRUE	FALSE
SPBC29A10.10c	ATP-dependent RNA helicase Dbl8	GO:0060255	regulation of macromolecule metabolic process	BP	1	0.600815	1	3.55445		FALSE	TRUE	FALSE
SPBC29A10.10c	ATP-dependent RNA helicase Dbl8	GO:0009889	regulation of biosynthetic process	BP	1	0.488798	1	3.91981		FALSE	TRUE	FALSE
SPBC29A10.10c	ATP-dependent RNA helicase Dbl8	GO:2000112	regulation of cellular macromolecule biosynthetic process	BP	1	0.446029	1	3.96376		FALSE	TRUE	FALSE
SPBC29A10.10c	ATP-dependent RNA helicase Dbl8	GO:0080090	regulation of primary metabolic process	BP	1	0.350305	1	3.74241		FALSE	TRUE	FALSE
SPBC29A10.10c	ATP-dependent RNA helicase Dbl8	GO:0010556	regulation of macromolecule biosynthetic process	BP	1	0.454175	1	3.95481		FALSE	TRUE	FALSE
SPBC29A10.10c	ATP-dependent RNA helicase Dbl8	GO:0031323	regulation of cellular metabolic process	BP	1	0.417515	1	3.69519		FALSE	TRUE	FALSE
SPBC29A10.10c	ATP-dependent RNA helicase Dbl8	GO:0010468	regulation of gene expression	BP	1	0.539715	1	3.8283		FALSE	TRUE	FALSE
SPBC29A10.10c	ATP-dependent RNA helicase Dbl8	GO:0031326	regulation of cellular biosynthetic process	BP	1	0.417515	1	3.91981		FALSE	TRUE	FALSE
SPBC29A10.10c	ATP-dependent RNA helicase Dbl8	GO:0044271	cellular nitrogen compound biosynthetic process	BP	1	0.325866	1	3.90396		FALSE	TRUE	FALSE
SPBC29A10.10c	ATP-dependent RNA helicase Dbl8	GO:1901362	organic cyclic compound biosynthetic process	BP	1	0.313646	1	4.35078		FALSE	TRUE	FALSE
SPBC29A10.10c	ATP-dependent RNA helicase Dbl8	GO:0032774	RNA biosynthetic process	BP	1	0.329939	1	5.5219		FALSE	TRUE	FALSE
SPBC29A10.10c	ATP-dependent RNA helicase Dbl8	GO:0034654	nucleobase-containing compound biosynthetic process	BP	1	0.305499	1	4.71913		FALSE	TRUE	FALSE
SPBC29A10.10c	ATP-dependent RNA helicase Dbl8	GO:0009059	macromolecule biosynthetic process	BP	1	0.307536	1	3.92473		FALSE	TRUE	FALSE
SPBC29A10.10c	ATP-dependent RNA helicase Dbl8	GO:0018130	heterocycle biosynthetic process	BP	1	0.281059	1	4.44798		FALSE	TRUE	FALSE
SPBC119.15	RNA polymerase II binding AAA family ATPase Npa3 (predicted)	GO:0045184	establishment of protein localization	BP	1	0.156823	1	4.68952		FALSE	TRUE	FALSE
SPBC119.15	RNA polymerase II binding AAA family ATPase Npa3 (predicted)	GO:0015031	protein transport	BP	1	0.175153	1	4.73012		FALSE	TRUE	FALSE
SPBC119.15	RNA polymerase II binding AAA family ATPase Npa3 (predicted)	GO:0033365	protein localization to organelle	BP	1	0.142566	1	4.96928		FALSE	TRUE	FALSE
SPBC119.15	RNA polymerase II binding AAA family ATPase Npa3 (predicted)	GO:0051169	nuclear transport	BP	1	0.171079	1	5.72393		FALSE	TRUE	FALSE
SPBC119.15	RNA polymerase II binding AAA family ATPase Npa3 (predicted)	GO:0051641	cellular localization	BP	1	0.221996	1	3.67383		FALSE	TRUE	FALSE
SPBC119.15	RNA polymerase II binding AAA family ATPase Npa3 (predicted)	GO:0051234	establishment of localization	BP	1	0.203666	1	3.47657		FALSE	TRUE	FALSE
SPBC119.15	RNA polymerase II binding AAA family ATPase Npa3 (predicted)	GO:0070727	cellular macromolecule localization	BP	1	0.181263	1	4.47116		FALSE	TRUE	FALSE
SPBC119.15	RNA polymerase II binding AAA family ATPase Npa3 (predicted)	GO:0071705	nitrogen compound transport	BP	1	0.152749	1	4.27088		FALSE	TRUE	FALSE
SPBC119.15	RNA polymerase II binding AAA family ATPase Npa3 (predicted)	GO:0034613	cellular protein localization	BP	1	0.197556	1	4.47758		FALSE	TRUE	FALSE
SPBC119.15	RNA polymerase II binding AAA family ATPase Npa3 (predicted)	GO:0006886	intracellular protein transport	BP	1	0.114053	1	4.76669		FALSE	TRUE	FALSE
SPBC119.15	RNA polymerase II binding AAA family ATPase Npa3 (predicted)	GO:0006913	nucleocytoplasmic transport	BP	1	0.187373	1	5.72393		FALSE	TRUE	FALSE
SPBC119.15	RNA polymerase II binding AAA family ATPase Npa3 (predicted)	GO:0046907	intracellular transport	BP	1	0.179226	1	4.17446		FALSE	TRUE	FALSE
SPBC119.15	RNA polymerase II binding AAA family ATPase Npa3 (predicted)	GO:0042886	amide transport	BP	1	0.158859	1	4.6328		FALSE	TRUE	FALSE
SPBC119.15	RNA polymerase II binding AAA family ATPase Npa3 (predicted)	GO:0072594	establishment of protein localization to organelle	BP	1	0.138493	1	5.4978		FALSE	TRUE	FALSE
SPBC119.15	RNA polymerase II binding AAA family ATPase Npa3 (predicted)	GO:0033036	macromolecule localization	BP	1	0.148676	1	4.13408		FALSE	TRUE	FALSE
SPBC119.15	RNA polymerase II binding AAA family ATPase Npa3 (predicted)	GO:0006810	transport	BP	1	0.187373	1	3.50456		FALSE	TRUE	FALSE
SPBC119.15	RNA polymerase II binding AAA family ATPase Npa3 (predicted)	GO:0008104	protein localization	BP	1	0.193483	1	4.14326		FALSE	TRUE	FALSE
SPBC119.15	RNA polymerase II binding AAA family ATPase Npa3 (predicted)	GO:0071702	organic substance transport	BP	1	0.164969	1	4.15874		FALSE	TRUE	FALSE
SPBC119.15	RNA polymerase II binding AAA family ATPase Npa3 (predicted)	GO:0015833	peptide transport	BP	1	0.191446	1	4.66076		FALSE	TRUE	FALSE
SPBC119.15	RNA polymerase II binding AAA family ATPase Npa3 (predicted)	GO:0051179	localization	BP	1	0.177189	1	3.1988		FALSE	TRUE	FALSE
SPBC6B1.02	Ark1/Prk1 family protein kinase Ppk30	GO:0051128	regulation of cellular component organization	BP	1	0.136456	1	4.49927		FALSE	TRUE	FALSE
SPBC6B1.02	Ark1/Prk1 family protein kinase Ppk30	GO:0051049	regulation of transport	BP	1	0.120163	1	6.41707		FALSE	TRUE	FALSE
SPAC9E9.12c	ABC transmembrane transporter Ybt1	GO:0051234	establishment of localization	BP	1	0.716904	1	3.47657	automatic	FALSE	TRUE	FALSE
SPAC9E9.12c	ABC transmembrane transporter Ybt1	GO:0071705	nitrogen compound transport	BP	1	0.553971	1	4.27088		FALSE	TRUE	FALSE
SPAC9E9.12c	ABC transmembrane transporter Ybt1	GO:0007034	vacuolar transport	BP	1	0.162933	1	5.68729		FALSE	TRUE	FALSE
SPAC9E9.12c	ABC transmembrane transporter Ybt1	GO:0098656	anion transmembrane transport	BP	1	0.191446	1	5.70179		FALSE	TRUE	FALSE
SPAC9E9.12c	ABC transmembrane transporter Ybt1	GO:0006820	anion transport	BP	1	0.319756	1	5.55286		FALSE	TRUE	FALSE
SPAC9E9.12c	ABC transmembrane transporter Ybt1	GO:0042886	amide transport	BP	1	0.468432	1	4.6328		FALSE	TRUE	FALSE
SPAC9E9.12c	ABC transmembrane transporter Ybt1	GO:0034220	ion transmembrane transport	BP	1	0.468432	1	4.98698		FALSE	TRUE	FALSE
SPAC9E9.12c	ABC transmembrane transporter Ybt1	GO:0006811	ion transport	BP	1	0.389002	1	4.86602		FALSE	TRUE	FALSE
SPAC9E9.12c	ABC transmembrane transporter Ybt1	GO:0015711	organic anion transport	BP	1	0.301426	1	5.69451		FALSE	TRUE	FALSE
SPAC9E9.12c	ABC transmembrane transporter Ybt1	GO:0006810	transport	BP	1	0.763747	1	3.50456	automatic	FALSE	TRUE	FALSE
SPAC9E9.12c	ABC transmembrane transporter Ybt1	GO:0071702	organic substance transport	BP	1	0.639511	1	4.15874		FALSE	TRUE	FALSE
SPAC9E9.12c	ABC transmembrane transporter Ybt1	GO:0015833	peptide transport	BP	1	0.372709	1	4.66076		FALSE	TRUE	FALSE
SPAC9E9.12c	ABC transmembrane transporter Ybt1	GO:0051179	localization	BP	1	0.690428	1	3.1988	automatic	FALSE	TRUE	FALSE
SPAC9E9.12c	ABC transmembrane transporter Ybt1	GO:0055085	transmembrane transport	BP	1	0.743381	1	4.56264	automatic	FALSE	TRUE	FALSE
SPAC5D6.13	Golgi phosphoprotein 3 family Vps74 (predicted)	GO:0006464	cellular protein modification process	BP	1	0.112016	1	4.25702		FALSE	TRUE	FALSE
SPAC5D6.13	Golgi phosphoprotein 3 family Vps74 (predicted)	GO:0043412	macromolecule modification	BP	1	0.162933	1	4.03422		FALSE	TRUE	FALSE
SPAC5D6.13	Golgi phosphoprotein 3 family Vps74 (predicted)	GO:0019538	protein metabolic process	BP	1	0.175153	1	3.49327		FALSE	TRUE	FALSE
SPAC5D6.13	Golgi phosphoprotein 3 family Vps74 (predicted)	GO:0036211	protein modification process	BP	1	0.126273	1	4.25702		FALSE	TRUE	FALSE
SPAC5D6.13	Golgi phosphoprotein 3 family Vps74 (predicted)	GO:0044267	cellular protein metabolic process	BP	1	0.142566	1	3.76847		FALSE	TRUE	FALSE
SPAC5D6.13	Golgi phosphoprotein 3 family Vps74 (predicted)	GO:0051641	cellular localization	BP	1	0.336049	1	3.67383		FALSE	TRUE	FALSE
SPAC5D6.13	Golgi phosphoprotein 3 family Vps74 (predicted)	GO:0033036	macromolecule localization	BP	1	0.234216	1	4.13408		FALSE	TRUE	FALSE
SPAC5D6.13	Golgi phosphoprotein 3 family Vps74 (predicted)	GO:0008104	protein localization	BP	1	0.217923	1	4.14326		FALSE	TRUE	FALSE
SPAC11D3.10	nifs homolog, possible cysteine desulfurase	GO:0006790	sulfur compound metabolic process	BP	1	0.342159	1	5.53417		FALSE	FALSE	TRUE
SPAC11D3.10	nifs homolog, possible cysteine desulfurase	GO:0044281	small molecule metabolic process	BP	1	0.327902	1	3.83054		FALSE	FALSE	TRUE
SPAC11D3.10	nifs homolog, possible cysteine desulfurase	GO:0044283	small molecule biosynthetic process	BP	1	0.101833	1	4.73844		FALSE	FALSE	TRUE
SPAC11D3.10	nifs homolog, possible cysteine desulfurase	GO:0043436	oxoacid metabolic process	BP	1	0.264766	1	4.4949		FALSE	FALSE	TRUE
SPAC11D3.10	nifs homolog, possible cysteine desulfurase	GO:0016053	organic acid biosynthetic process	BP	1	0.215886	1	5.22814		FALSE	FALSE	TRUE
SPAC11D3.10	nifs homolog, possible cysteine desulfurase	GO:0046394	carboxylic acid biosynthetic process	BP	1	0.164969	1	5.22814		FALSE	FALSE	TRUE
SPAC11D3.10	nifs homolog, possible cysteine desulfurase	GO:0006082	organic acid metabolic process	BP	1	0.301426	1	4.49054		FALSE	FALSE	TRUE
SPAC11D3.10	nifs homolog, possible cysteine desulfurase	GO:1901566	organonitrogen compound biosynthetic process	BP	1	0.309572	1	3.94847		FALSE	FALSE	TRUE
SPAC11D3.10	nifs homolog, possible cysteine desulfurase	GO:0006520	cellular amino acid metabolic process	BP	1	0.215886	1	4.94844		FALSE	FALSE	TRUE
SPAC11D3.10	nifs homolog, possible cysteine desulfurase	GO:0008652	cellular amino acid biosynthetic process	BP	1	0.189409	1	5.57191		FALSE	FALSE	TRUE
SPAC11D3.10	nifs homolog, possible cysteine desulfurase	GO:0044271	cellular nitrogen compound biosynthetic process	BP	1	0.228106	1	3.90396		FALSE	FALSE	TRUE
SPAC11D3.10	nifs homolog, possible cysteine desulfurase	GO:0019752	carboxylic acid metabolic process	BP	1	0.262729	1	4.5103		FALSE	FALSE	TRUE
SPAC167.02	geranylgeranyltransferase II beta subunit Ptb1	GO:0045184	establishment of protein localization	BP	1	0.193483	1	4.68952		FALSE	TRUE	FALSE
SPAC167.02	geranylgeranyltransferase II beta subunit Ptb1	GO:0071705	nitrogen compound transport	BP	1	0.130346	1	4.27088		FALSE	TRUE	FALSE
SPAC167.02	geranylgeranyltransferase II beta subunit Ptb1	GO:0090150	establishment of protein localization to membrane	BP	1	0.10387	1	6.51089		FALSE	TRUE	FALSE
SPAC167.02	geranylgeranyltransferase II beta subunit Ptb1	GO:0071702	organic substance transport	BP	1	0.150713	1	4.15874		FALSE	TRUE	FALSE
SPAP8A3.12c	tripeptidyl-peptidase II Tpp2	GO:0006508	proteolysis	BP	1	0.148676	1	4.78112		FALSE	TRUE	FALSE
SPAP8A3.12c	tripeptidyl-peptidase II Tpp2	GO:0019538	protein metabolic process	BP	1	0.319756	1	3.49327		FALSE	TRUE	FALSE
SPCC4F11.02	MAP kinase threonine phosphatase Ptc1	GO:0070887	cellular response to chemical stimulus	BP	1	0.144603	1	5.64503	experimental	FALSE	TRUE	FALSE
SPCC4F11.02	MAP kinase threonine phosphatase Ptc1	GO:0042221	response to chemical	BP	1	0.207739	1	5.41228	experimental	FALSE	TRUE	FALSE
SPBC557.04	Ark1/Prk1 family protein kinase Ppk29	GO:0051128	regulation of cellular component organization	BP	1	0.160896	1	4.49927		FALSE	TRUE	FALSE
SPBC557.04	Ark1/Prk1 family protein kinase Ppk29	GO:0050794	regulation of cellular process	BP	1	0.653768	1	2.8982		FALSE	TRUE	FALSE
SPBC557.04	Ark1/Prk1 family protein kinase Ppk29	GO:0032879	regulation of localization	BP	1	0.130346	1	5.76195		FALSE	TRUE	FALSE
SPAC323.02c	20S proteasome complex subunit alpha 5, Pup2	GO:0006508	proteolysis	BP	1	0.810591	1	4.78112	automatic	FALSE	TRUE	FALSE
SPAC323.02c	20S proteasome complex subunit alpha 5, Pup2	GO:0019538	protein metabolic process	BP	1	0.737271	1	3.49327	automatic	FALSE	TRUE	FALSE
SPAC4D7.12c	predicted GTPAse with a role in RNA polymerase localization (predicted)	GO:0016043	cellular component organization	BP	1	0.240326	1	3.17343		FALSE	TRUE	FALSE
SPAC3A12.18	glucose-6-phosphate 1-dehydrogenase Zwf1	GO:0044281	small molecule metabolic process	BP	1	0.374745	1	3.83054	automatic	FALSE	TRUE	FALSE
SPAC3A12.18	glucose-6-phosphate 1-dehydrogenase Zwf1	GO:0005975	carbohydrate metabolic process	BP	1	0.258656	1	5.57191	automatic	FALSE	TRUE	FALSE
SPBC31F10.13c	histone H3.3 H4 chaperone, hira family Hip1	GO:0034728	nucleosome organization	BP	1	0.230143	1	6.23974	experimental	FALSE	TRUE	FALSE
SPCC576.05	TREX2 complex sununit Sac3 (predicted)	GO:0090304	nucleic acid metabolic process	BP	1	0.175153	1	3.20299		FALSE	TRUE	FALSE
SPCC576.05	TREX2 complex sununit Sac3 (predicted)	GO:0045184	establishment of protein localization	BP	1	0.209776	1	4.68952	curated	FALSE	TRUE	FALSE
SPCC576.05	TREX2 complex sununit Sac3 (predicted)	GO:0006886	intracellular protein transport	BP	1	0.14053	1	4.76669	curated	FALSE	TRUE	FALSE
SPCC576.05	TREX2 complex sununit Sac3 (predicted)	GO:0042886	amide transport	BP	1	0.12831	1	4.6328	curated	FALSE	TRUE	FALSE
SPCC576.05	TREX2 complex sununit Sac3 (predicted)	GO:0033036	macromolecule localization	BP	1	0.268839	1	4.13408	curated	FALSE	TRUE	FALSE
SPCC576.05	TREX2 complex sununit Sac3 (predicted)	GO:0008104	protein localization	BP	1	0.293279	1	4.14326	curated	FALSE	TRUE	FALSE
SPCC576.05	TREX2 complex sununit Sac3 (predicted)	GO:0015833	peptide transport	BP	1	0.187373	1	4.66076	curated	FALSE	TRUE	FALSE
SPCC576.05	TREX2 complex sununit Sac3 (predicted)	GO:0006396	RNA processing	BP	1	0.1222	1	4.40317		FALSE	TRUE	FALSE
SPCC576.05	TREX2 complex sununit Sac3 (predicted)	GO:0016071	mRNA metabolic process	BP	1	0.112016	1	4.88519		FALSE	TRUE	FALSE
SPCC576.05	TREX2 complex sununit Sac3 (predicted)	GO:0016070	RNA metabolic process	BP	1	0.167006	1	3.70307		FALSE	TRUE	FALSE
SPCC576.05	TREX2 complex sununit Sac3 (predicted)	GO:0016043	cellular component organization	BP	1	0.228106	1	3.17343		FALSE	TRUE	FALSE
SPCC576.05	TREX2 complex sununit Sac3 (predicted)	GO:0070727	cellular macromolecule localization	BP	1	0.285132	1	4.47116	curated	FALSE	TRUE	FALSE
SPCC1235.05c	SMARCAD1 family ATP-dependent DNA helicase Fft2 (predicted)	GO:0050794	regulation of cellular process	BP	1	0.509165	1	2.8982	curated	FALSE	TRUE	FALSE
SPBC1D7.05	MAP kinase kinase kinase Byr2	GO:0032268	regulation of cellular protein metabolic process	BP	1	0.136456	1	5.51582		FALSE	TRUE	FALSE
SPBC1D7.05	MAP kinase kinase kinase Byr2	GO:0009893	positive regulation of metabolic process	BP	1	0.152749	1	4.74684		FALSE	TRUE	FALSE
SPBC1D7.05	MAP kinase kinase kinase Byr2	GO:0048583	regulation of response to stimulus	BP	1	0.228106	1	5.42327		FALSE	TRUE	FALSE
SPBC1D7.05	MAP kinase kinase kinase Byr2	GO:0031323	regulation of cellular metabolic process	BP	1	0.242363	1	3.69519		FALSE	TRUE	FALSE
SPBC1D7.05	MAP kinase kinase kinase Byr2	GO:0048584	positive regulation of response to stimulus	BP	1	0.295316	1	6.46288		FALSE	TRUE	FALSE
SPBC1D7.05	MAP kinase kinase kinase Byr2	GO:0051171	regulation of nitrogen compound metabolic process	BP	1	0.250509	1	3.77908		FALSE	TRUE	FALSE
SPBC1D7.05	MAP kinase kinase kinase Byr2	GO:0080090	regulation of primary metabolic process	BP	1	0.217923	1	3.74241		FALSE	TRUE	FALSE
SPBC1D7.05	MAP kinase kinase kinase Byr2	GO:0031325	positive regulation of cellular metabolic process	BP	1	0.14664	1	4.77244		FALSE	TRUE	FALSE
SPBC1D7.05	MAP kinase kinase kinase Byr2	GO:0023051	regulation of signaling	BP	1	0.281059	1	5.78548		FALSE	TRUE	FALSE
SPBC1D7.05	MAP kinase kinase kinase Byr2	GO:0032270	positive regulation of cellular protein metabolic process	BP	1	0.11609	1	6.51089		FALSE	TRUE	FALSE
SPBC1D7.05	MAP kinase kinase kinase Byr2	GO:0010604	positive regulation of macromolecule metabolic process	BP	1	0.154786	1	4.78988		FALSE	TRUE	FALSE
SPBC1D7.05	MAP kinase kinase kinase Byr2	GO:0051174	regulation of phosphorus metabolic process	BP	1	0.167006	1	6.54423		FALSE	TRUE	FALSE
SPBC1D7.05	MAP kinase kinase kinase Byr2	GO:0060255	regulation of macromolecule metabolic process	BP	1	0.303462	1	3.55445		FALSE	TRUE	FALSE
SPBC1D7.05	MAP kinase kinase kinase Byr2	GO:1902531	regulation of intracellular signal transduction	BP	1	0.291242	1	6.0166		FALSE	TRUE	FALSE
SPBC1D7.05	MAP kinase kinase kinase Byr2	GO:0031399	regulation of protein modification process	BP	1	0.169043	1	6.09998		FALSE	TRUE	FALSE
SPBC1D7.05	MAP kinase kinase kinase Byr2	GO:0010646	regulation of cell communication	BP	1	0.246436	1	5.69451		FALSE	TRUE	FALSE
SPBC1D7.05	MAP kinase kinase kinase Byr2	GO:0051173	positive regulation of nitrogen compound metabolic process	BP	1	0.132383	1	4.80764		FALSE	TRUE	FALSE
SPBC1D7.05	MAP kinase kinase kinase Byr2	GO:0019220	regulation of phosphate metabolic process	BP	1	0.136456	1	6.54423		FALSE	TRUE	FALSE
SPBC1D7.05	MAP kinase kinase kinase Byr2	GO:0009966	regulation of signal transduction	BP	1	0.268839	1	5.79345		FALSE	TRUE	FALSE
SPBC1D7.05	MAP kinase kinase kinase Byr2	GO:0019222	regulation of metabolic process	BP	1	0.299389	1	3.51189		FALSE	TRUE	FALSE
SPBC1D7.05	MAP kinase kinase kinase Byr2	GO:0051247	positive regulation of protein metabolic process	BP	1	0.124236	1	6.51089		FALSE	TRUE	FALSE
SPBC1D7.05	MAP kinase kinase kinase Byr2	GO:0006950	response to stress	BP	1	0.228106	1	4.13256		FALSE	TRUE	FALSE
SPBC1D7.05	MAP kinase kinase kinase Byr2	GO:0033554	cellular response to stress	BP	1	0.201629	1	4.13866		FALSE	TRUE	FALSE
SPBC1D7.05	MAP kinase kinase kinase Byr2	GO:0051716	cellular response to stimulus	BP	1	0.279022	1	4.04948	experimental	FALSE	TRUE	FALSE
SPBC1D7.05	MAP kinase kinase kinase Byr2	GO:0050896	response to stimulus	BP	1	0.297352	1	4.04113	experimental	FALSE	TRUE	FALSE
SPAC26A3.11	mitochondrial omega-amidase (predicted)	GO:0006520	cellular amino acid metabolic process	BP	1	0.205703	1	4.94844		FALSE	TRUE	FALSE
SPAC26A3.11	mitochondrial omega-amidase (predicted)	GO:1901605	alpha-amino acid metabolic process	BP	1	0.203666	1	5.17073		FALSE	TRUE	FALSE
SPAC26A3.11	mitochondrial omega-amidase (predicted)	GO:0043603	cellular amide metabolic process	BP	1	0.114053	1	4.5282		FALSE	TRUE	FALSE
SPAC26A3.11	mitochondrial omega-amidase (predicted)	GO:0032787	monocarboxylic acid metabolic process	BP	1	0.152749	1	5.93964		FALSE	TRUE	FALSE
SPBC119.07	serine/threonine protein kinase Ppk19	GO:0033036	macromolecule localization	BP	1	0.175153	1	4.13408		FALSE	TRUE	FALSE
SPBC119.07	serine/threonine protein kinase Ppk19	GO:0070727	cellular macromolecule localization	BP	1	0.124236	1	4.47116		FALSE	TRUE	FALSE
SPBC119.07	serine/threonine protein kinase Ppk19	GO:0034613	cellular protein localization	BP	1	0.148676	1	4.47758		FALSE	TRUE	FALSE
SPBC119.07	serine/threonine protein kinase Ppk19	GO:0008104	protein localization	BP	1	0.171079	1	4.14326		FALSE	TRUE	FALSE
SPBC12D12.05c	mitochondrial carrier, ATP:ADP antiporter (predicted)	GO:0006812	cation transport	BP	1	0.169043	1	5.38532		FALSE	TRUE	FALSE
SPAC19G12.09	NADH/NADPH-dependent indole-3-acetaldehyde reductase, implicated in cellular detoxification	GO:0044281	small molecule metabolic process	BP	1	0.680244	1	3.83054		FALSE	FALSE	TRUE
SPBC713.04c	U3 snoRNP-associated protein Utp1 (predicted)	GO:0006364	rRNA processing	BP	1	0.374745	1	5.35391	curated	FALSE	TRUE	FALSE
SPAC977.17	MIP water channel (predicted)	GO:0055085	transmembrane transport	BP	1	0.230143	1	4.56264	curated	FALSE	TRUE	FALSE
SPCC31H12.07	COPII cargo receptor subunit Sec23a (predicted)	GO:0050794	regulation of cellular process	BP	1	0.124236	1	2.8982		FALSE	TRUE	FALSE
SPCC31H12.07	COPII cargo receptor subunit Sec23a (predicted)	GO:0016043	cellular component organization	BP	1	0.138493	1	3.17343	automatic	FALSE	TRUE	FALSE
SPCC1840.04	metacaspase Pca1	GO:0019538	protein metabolic process	BP	1	0.154786	1	3.49327		FALSE	FALSE	FALSE
SPAC23G3.12c	serine protease, involved in lipid metabolism (predicted)	GO:0019222	regulation of metabolic process	BP	1	0.12831	1	3.51189		FALSE	TRUE	FALSE
SPAC23G3.12c	serine protease, involved in lipid metabolism (predicted)	GO:0050794	regulation of cellular process	BP	1	0.112016	1	2.8982		FALSE	TRUE	FALSE
SPAC23G3.12c	serine protease, involved in lipid metabolism (predicted)	GO:0060255	regulation of macromolecule metabolic process	BP	1	0.112016	1	3.55445		FALSE	TRUE	FALSE
SPAC23G3.12c	serine protease, involved in lipid metabolism (predicted)	GO:1901575	organic substance catabolic process	BP	1	0.10387	1	4.16657		FALSE	TRUE	FALSE
SPAC23G3.12c	serine protease, involved in lipid metabolism (predicted)	GO:0006508	proteolysis	BP	1	0.112016	1	4.78112		FALSE	TRUE	FALSE
SPAC23G3.12c	serine protease, involved in lipid metabolism (predicted)	GO:0009056	catabolic process	BP	1	0.1222	1	4.05509		FALSE	TRUE	FALSE
SPAC23G3.12c	serine protease, involved in lipid metabolism (predicted)	GO:0019538	protein metabolic process	BP	1	0.187373	1	3.49327		FALSE	TRUE	FALSE
SPBC1683.03c	transmembrane transporter (predicted)	GO:0051234	establishment of localization	BP	1	0.443992	1	3.47657	automatic	FALSE	FALSE	FALSE
SPBC1683.03c	transmembrane transporter (predicted)	GO:0006811	ion transport	BP	1	0.248473	1	4.86602		FALSE	FALSE	FALSE
SPBC1683.03c	transmembrane transporter (predicted)	GO:0006810	transport	BP	1	0.433809	1	3.50456	automatic	FALSE	FALSE	FALSE
SPBC1683.03c	transmembrane transporter (predicted)	GO:0071705	nitrogen compound transport	BP	1	0.150713	1	4.27088		FALSE	FALSE	FALSE
SPBC1683.03c	transmembrane transporter (predicted)	GO:0006812	cation transport	BP	1	0.11609	1	5.38532		FALSE	FALSE	FALSE
SPBC1683.03c	transmembrane transporter (predicted)	GO:0051179	localization	BP	1	0.421589	1	3.1988	automatic	FALSE	FALSE	FALSE
SPBC336.05c	small RNA 2'-O-methyltransferase Hen1 (predicted)	GO:0043412	macromolecule modification	BP	1	0.144603	1	4.03422	automatic	FALSE	TRUE	FALSE
SPBC336.05c	small RNA 2'-O-methyltransferase Hen1 (predicted)	GO:0016070	RNA metabolic process	BP	1	0.118126	1	3.70307	curated	FALSE	TRUE	FALSE
SPBC336.05c	small RNA 2'-O-methyltransferase Hen1 (predicted)	GO:0090304	nucleic acid metabolic process	BP	1	0.181263	1	3.20299	curated	FALSE	TRUE	FALSE
SPAC17G6.14c	TREX complex subunit, ATP-dependent RNA helicase Uap56	GO:0009892	negative regulation of metabolic process	BP	1	0.126273	1	4.36986		FALSE	TRUE	FALSE
SPAC17G6.14c	TREX complex subunit, ATP-dependent RNA helicase Uap56	GO:0060255	regulation of macromolecule metabolic process	BP	1	0.144603	1	3.55445		FALSE	TRUE	FALSE
SPAC17G6.14c	TREX complex subunit, ATP-dependent RNA helicase Uap56	GO:0010629	negative regulation of gene expression	BP	1	0.10387	1	4.67112		FALSE	TRUE	FALSE
SPAC17G6.14c	TREX complex subunit, ATP-dependent RNA helicase Uap56	GO:0016043	cellular component organization	BP	1	0.12831	1	3.17343		FALSE	TRUE	FALSE
SPAC17G6.14c	TREX complex subunit, ATP-dependent RNA helicase Uap56	GO:0010468	regulation of gene expression	BP	1	0.156823	1	3.8283		FALSE	TRUE	FALSE
SPAC17G6.14c	TREX complex subunit, ATP-dependent RNA helicase Uap56	GO:0019222	regulation of metabolic process	BP	1	0.175153	1	3.51189		FALSE	TRUE	FALSE
SPAC17G6.14c	TREX complex subunit, ATP-dependent RNA helicase Uap56	GO:0010605	negative regulation of macromolecule metabolic process	BP	1	0.164969	1	4.41117		FALSE	TRUE	FALSE
SPAC17G6.14c	TREX complex subunit, ATP-dependent RNA helicase Uap56	GO:0044271	cellular nitrogen compound biosynthetic process	BP	1	0.10387	1	3.90396		FALSE	TRUE	FALSE
SPAC20G8.08c	SMARCAD1 family ATP-dependent DNA helicase Fft1 (predicted)	GO:0050794	regulation of cellular process	BP	1	0.441955	1	2.8982	curated	FALSE	TRUE	FALSE
SPAC1834.02	pentafunctional aromatic polypeptide Aro1 (predicted)	GO:1901362	organic cyclic compound biosynthetic process	BP	1	0.217923	1	4.35078	automatic	FALSE	FALSE	FALSE
SPAC1834.02	pentafunctional aromatic polypeptide Aro1 (predicted)	GO:1901566	organonitrogen compound biosynthetic process	BP	1	0.370672	1	3.94847	automatic	FALSE	FALSE	FALSE
SPAC1834.02	pentafunctional aromatic polypeptide Aro1 (predicted)	GO:0006520	cellular amino acid metabolic process	BP	1	0.297352	1	4.94844	automatic	FALSE	FALSE	FALSE
SPAC1834.02	pentafunctional aromatic polypeptide Aro1 (predicted)	GO:0008652	cellular amino acid biosynthetic process	BP	1	0.240326	1	5.57191	automatic	FALSE	FALSE	FALSE
SPAC1834.02	pentafunctional aromatic polypeptide Aro1 (predicted)	GO:0019438	aromatic compound biosynthetic process	BP	1	0.234216	1	4.48404	automatic	FALSE	FALSE	FALSE
SPBC1685.05	serine protease (predicted)	GO:0019222	regulation of metabolic process	BP	1	0.105906	1	3.51189		FALSE	TRUE	FALSE
SPBC1685.05	serine protease (predicted)	GO:1901575	organic substance catabolic process	BP	1	0.175153	1	4.16657	curated	FALSE	TRUE	FALSE
SPBC1685.05	serine protease (predicted)	GO:0009056	catabolic process	BP	1	0.162933	1	4.05509	curated	FALSE	TRUE	FALSE
SPBC1685.05	serine protease (predicted)	GO:0044248	cellular catabolic process	BP	1	0.126273	1	4.14326	curated	FALSE	TRUE	FALSE
SPAC3C7.13c	glucose-6-phosphate 1-dehydrogenase (predicted)	GO:0044281	small molecule metabolic process	BP	1	0.311609	1	3.83054	automatic	FALSE	TRUE	FALSE
SPAC3C7.13c	glucose-6-phosphate 1-dehydrogenase (predicted)	GO:0005975	carbohydrate metabolic process	BP	1	0.205703	1	5.57191	automatic	FALSE	TRUE	FALSE
SPCC1494.05c	CSN-associated deubiquitinating enzyme Ubp12	GO:0006464	cellular protein modification process	BP	1	0.11609	1	4.25702	experimental	FALSE	TRUE	FALSE
SPCC1494.05c	CSN-associated deubiquitinating enzyme Ubp12	GO:0036211	protein modification process	BP	1	0.158859	1	4.25702	experimental	FALSE	TRUE	FALSE
SPCC1494.05c	CSN-associated deubiquitinating enzyme Ubp12	GO:0043412	macromolecule modification	BP	1	0.187373	1	4.03422	experimental	FALSE	TRUE	FALSE
SPCC1494.05c	CSN-associated deubiquitinating enzyme Ubp12	GO:0044267	cellular protein metabolic process	BP	1	0.150713	1	3.76847	experimental	FALSE	TRUE	FALSE
SPCC1494.05c	CSN-associated deubiquitinating enzyme Ubp12	GO:0006508	proteolysis	BP	1	0.299389	1	4.78112	experimental	FALSE	TRUE	FALSE
SPCC1494.05c	CSN-associated deubiquitinating enzyme Ubp12	GO:0019538	protein metabolic process	BP	1	0.266802	1	3.49327	experimental	FALSE	TRUE	FALSE
SPCC1494.05c	CSN-associated deubiquitinating enzyme Ubp12	GO:0070647	protein modification by small protein conjugation or removal	BP	1	0.209776	1	5.28905	experimental	FALSE	TRUE	FALSE
SPCC1494.05c	CSN-associated deubiquitinating enzyme Ubp12	GO:0051128	regulation of cellular component organization	BP	1	0.132383	1	4.49927		FALSE	TRUE	FALSE
SPCC1494.05c	CSN-associated deubiquitinating enzyme Ubp12	GO:0048519	negative regulation of biological process	BP	1	0.120163	1	3.83054		FALSE	TRUE	FALSE
SPCC1494.05c	CSN-associated deubiquitinating enzyme Ubp12	GO:0050794	regulation of cellular process	BP	1	0.266802	1	2.8982		FALSE	TRUE	FALSE
SPBC16E9.11c	HECT-type ubiquitin-protein ligase E3 Pub3 (predicted)	GO:0015031	protein transport	BP	1	0.325866	1	4.73012		FALSE	TRUE	FALSE
SPBC16E9.11c	HECT-type ubiquitin-protein ligase E3 Pub3 (predicted)	GO:0045184	establishment of protein localization	BP	1	0.238289	1	4.68952		FALSE	TRUE	FALSE
SPBC16E9.11c	HECT-type ubiquitin-protein ligase E3 Pub3 (predicted)	GO:0042886	amide transport	BP	1	0.199593	1	4.6328		FALSE	TRUE	FALSE
SPBC16E9.11c	HECT-type ubiquitin-protein ligase E3 Pub3 (predicted)	GO:0051234	establishment of localization	BP	1	0.384929	1	3.47657		FALSE	TRUE	FALSE
SPBC16E9.11c	HECT-type ubiquitin-protein ligase E3 Pub3 (predicted)	GO:0033036	macromolecule localization	BP	1	0.228106	1	4.13408		FALSE	TRUE	FALSE
SPBC16E9.11c	HECT-type ubiquitin-protein ligase E3 Pub3 (predicted)	GO:0006810	transport	BP	1	0.191446	1	3.50456		FALSE	TRUE	FALSE
SPBC16E9.11c	HECT-type ubiquitin-protein ligase E3 Pub3 (predicted)	GO:0071705	nitrogen compound transport	BP	1	0.309572	1	4.27088		FALSE	TRUE	FALSE
SPBC16E9.11c	HECT-type ubiquitin-protein ligase E3 Pub3 (predicted)	GO:0008104	protein localization	BP	1	0.340122	1	4.14326		FALSE	TRUE	FALSE
SPBC16E9.11c	HECT-type ubiquitin-protein ligase E3 Pub3 (predicted)	GO:0071702	organic substance transport	BP	1	0.307536	1	4.15874		FALSE	TRUE	FALSE
SPBC16E9.11c	HECT-type ubiquitin-protein ligase E3 Pub3 (predicted)	GO:0015833	peptide transport	BP	1	0.199593	1	4.66076		FALSE	TRUE	FALSE
SPBC16E9.11c	HECT-type ubiquitin-protein ligase E3 Pub3 (predicted)	GO:0051179	localization	BP	1	0.336049	1	3.1988		FALSE	TRUE	FALSE
SPBC16E9.11c	HECT-type ubiquitin-protein ligase E3 Pub3 (predicted)	GO:0072594	establishment of protein localization to organelle	BP	1	0.315682	1	5.4978		FALSE	TRUE	FALSE
SPBC16E9.11c	HECT-type ubiquitin-protein ligase E3 Pub3 (predicted)	GO:0033365	protein localization to organelle	BP	1	0.240326	1	4.96928		FALSE	TRUE	FALSE
SPBC16E9.11c	HECT-type ubiquitin-protein ligase E3 Pub3 (predicted)	GO:0051641	cellular localization	BP	1	0.338086	1	3.67383		FALSE	TRUE	FALSE
SPBC16E9.11c	HECT-type ubiquitin-protein ligase E3 Pub3 (predicted)	GO:0070727	cellular macromolecule localization	BP	1	0.268839	1	4.47116		FALSE	TRUE	FALSE
SPBC16E9.11c	HECT-type ubiquitin-protein ligase E3 Pub3 (predicted)	GO:0034613	cellular protein localization	BP	1	0.344196	1	4.47758		FALSE	TRUE	FALSE
SPBC16E9.11c	HECT-type ubiquitin-protein ligase E3 Pub3 (predicted)	GO:0007034	vacuolar transport	BP	1	0.264766	1	5.68729		FALSE	TRUE	FALSE
SPBC16E9.11c	HECT-type ubiquitin-protein ligase E3 Pub3 (predicted)	GO:0046907	intracellular transport	BP	1	0.268839	1	4.17446		FALSE	TRUE	FALSE
SPAC823.08c	ATP-dependent RNA helicase Rrp3 (predicted)	GO:0006364	rRNA processing	BP	1	0.171079	1	5.35391	curated	FALSE	TRUE	FALSE
SPBC4F6.18c	ADP-ribosylation factor, Arf family Arf1	GO:0050793	regulation of developmental process	BP	1	0.313646	1	5.68012		FALSE	TRUE	FALSE
SPBC4F6.18c	ADP-ribosylation factor, Arf family Arf1	GO:0048518	positive regulation of biological process	BP	1	0.350305	1	3.96761		FALSE	TRUE	FALSE
SPBC4F6.18c	ADP-ribosylation factor, Arf family Arf1	GO:0048522	positive regulation of cellular process	BP	1	0.262729	1	3.98189		FALSE	TRUE	FALSE
SPBC4F6.18c	ADP-ribosylation factor, Arf family Arf1	GO:0050794	regulation of cellular process	BP	1	0.464358	1	2.8982		FALSE	TRUE	FALSE
SPBC4F6.18c	ADP-ribosylation factor, Arf family Arf1	GO:0035556	intracellular signal transduction	BP	1	0.150713	1	5.19242		FALSE	TRUE	FALSE
SPBC4F6.18c	ADP-ribosylation factor, Arf family Arf1	GO:0007165	signal transduction	BP	1	0.173116	1	4.83487		FALSE	TRUE	FALSE
SPBC4F6.18c	ADP-ribosylation factor, Arf family Arf1	GO:0070727	cellular macromolecule localization	BP	1	0.144603	1	4.47116	curated	FALSE	TRUE	FALSE
SPBC4F6.18c	ADP-ribosylation factor, Arf family Arf1	GO:0034613	cellular protein localization	BP	1	0.12831	1	4.47758	curated	FALSE	TRUE	FALSE
SPBC4F6.18c	ADP-ribosylation factor, Arf family Arf1	GO:0051128	regulation of cellular component organization	BP	1	0.346232	1	4.49927		FALSE	TRUE	FALSE
SPBC4F6.18c	ADP-ribosylation factor, Arf family Arf1	GO:0032879	regulation of localization	BP	1	0.132383	1	5.76195		FALSE	TRUE	FALSE
SPBC4F6.18c	ADP-ribosylation factor, Arf family Arf1	GO:0051049	regulation of transport	BP	1	0.14053	1	6.41707		FALSE	TRUE	FALSE
SPBC4F6.18c	ADP-ribosylation factor, Arf family Arf1	GO:0051130	positive regulation of cellular component organization	BP	1	0.164969	1	5.36427		FALSE	TRUE	FALSE
SPBC4F6.18c	ADP-ribosylation factor, Arf family Arf1	GO:0022402	cell cycle process	BP	1	0.250509	1	3.7611		FALSE	TRUE	FALSE
SPBC4F6.18c	ADP-ribosylation factor, Arf family Arf1	GO:0032506	cytokinetic process	BP	1	0.13442	1	5.81775		FALSE	TRUE	FALSE
SPBC4F6.18c	ADP-ribosylation factor, Arf family Arf1	GO:0016043	cellular component organization	BP	1	0.309572	1	3.17343		FALSE	TRUE	FALSE
SPBC4F6.18c	ADP-ribosylation factor, Arf family Arf1	GO:0065008	regulation of biological quality	BP	1	0.232179	1	4.49708		FALSE	TRUE	FALSE
SPCC63.07	tRNAHis guanylyltransferase Thg1 (predicted)	GO:0006400	tRNA modification	BP	1	0.154786	1	6.16742	curated	FALSE	TRUE	FALSE
SPBC12C2.11	glutamine-fructose-6-phosphate transaminase Gfa1 (predicted)	GO:1901135	carbohydrate derivative metabolic process	BP	1	0.213849	1	4.98698	curated	FALSE	TRUE	FALSE
SPBC12C2.11	glutamine-fructose-6-phosphate transaminase Gfa1 (predicted)	GO:1901137	carbohydrate derivative biosynthetic process	BP	1	0.105906	1	5.45698	curated	FALSE	TRUE	FALSE
SPBC12C2.11	glutamine-fructose-6-phosphate transaminase Gfa1 (predicted)	GO:1901566	organonitrogen compound biosynthetic process	BP	1	0.167006	1	3.94847	curated	FALSE	TRUE	FALSE
SPCC553.08c	GTPase Ria1 (predicted)	GO:0016043	cellular component organization	BP	1	0.14053	1	3.17343		FALSE	TRUE	FALSE
SPAC17C9.03	translation initiation factor eIF4G	GO:0016043	cellular component organization	BP	1	0.221996	1	3.17343		FALSE	TRUE	FALSE
SPAC17C9.03	translation initiation factor eIF4G	GO:0022607	cellular component assembly	BP	1	0.197556	1	4.31549		FALSE	TRUE	FALSE
SPAC31A2.07c	ATP-dependent RNA helicase Dbp10 (predicted)	GO:0006396	RNA processing	BP	1	0.633401	1	4.40317		FALSE	TRUE	FALSE
SPAC31A2.07c	ATP-dependent RNA helicase Dbp10 (predicted)	GO:0090304	nucleic acid metabolic process	BP	1	0.649695	1	3.20299		FALSE	TRUE	FALSE
SPAC31A2.07c	ATP-dependent RNA helicase Dbp10 (predicted)	GO:0016070	RNA metabolic process	BP	1	0.651731	1	3.70307		FALSE	TRUE	FALSE
SPAC959.02	alpha SNAP (predicted)	GO:0061024	membrane organization	BP	1	0.148676	1	5.68012		FALSE	TRUE	FALSE
SPAC4G8.05	serine/threonine protein kinase Ppk14 (predicted)	GO:0006464	cellular protein modification process	BP	1	0.124236	1	4.25702		FALSE	FALSE	FALSE
SPAC4G8.05	serine/threonine protein kinase Ppk14 (predicted)	GO:0036211	protein modification process	BP	1	0.11609	1	4.25702		FALSE	FALSE	FALSE
SPAC4G8.05	serine/threonine protein kinase Ppk14 (predicted)	GO:0043412	macromolecule modification	BP	1	0.132383	1	4.03422		FALSE	FALSE	FALSE
SPAC4G8.05	serine/threonine protein kinase Ppk14 (predicted)	GO:0044267	cellular protein metabolic process	BP	1	0.101833	1	3.76847		FALSE	FALSE	FALSE
SPAC4G8.05	serine/threonine protein kinase Ppk14 (predicted)	GO:0019538	protein metabolic process	BP	1	0.175153	1	3.49327		FALSE	FALSE	FALSE
SPAC4G8.05	serine/threonine protein kinase Ppk14 (predicted)	GO:0016043	cellular component organization	BP	1	0.344196	1	3.17343		FALSE	FALSE	FALSE
SPAC4G8.05	serine/threonine protein kinase Ppk14 (predicted)	GO:0065008	regulation of biological quality	BP	1	0.323829	1	4.49708		FALSE	FALSE	FALSE
SPBC660.10	mitochondrial translation elongation factor G Mef2 (predicted)	GO:0044271	cellular nitrogen compound biosynthetic process	BP	1	0.1222	1	3.90396	curated	FALSE	TRUE	FALSE
SPBC660.10	mitochondrial translation elongation factor G Mef2 (predicted)	GO:0044267	cellular protein metabolic process	BP	1	0.12831	1	3.76847	curated	FALSE	TRUE	FALSE
SPBC660.10	mitochondrial translation elongation factor G Mef2 (predicted)	GO:0043603	cellular amide metabolic process	BP	1	0.118126	1	4.5282	curated	FALSE	TRUE	FALSE
SPBC660.10	mitochondrial translation elongation factor G Mef2 (predicted)	GO:0019538	protein metabolic process	BP	1	0.183299	1	3.49327	curated	FALSE	TRUE	FALSE
SPBC660.10	mitochondrial translation elongation factor G Mef2 (predicted)	GO:0043604	amide biosynthetic process	BP	1	0.10387	1	4.66076	curated	FALSE	TRUE	FALSE
SPBC660.10	mitochondrial translation elongation factor G Mef2 (predicted)	GO:1901566	organonitrogen compound biosynthetic process	BP	1	0.11609	1	3.94847	curated	FALSE	TRUE	FALSE
SPBC660.10	mitochondrial translation elongation factor G Mef2 (predicted)	GO:0016043	cellular component organization	BP	1	0.118126	1	3.17343	automatic	FALSE	TRUE	FALSE
SPAC17G8.14c	protein kinase C (PKC)-like Pck1	GO:0071554	cell wall organization or biogenesis	BP	1	0.152749	1	6.37327	experimental	FALSE	TRUE	FALSE
SPAC13F5.01c	mitochondrial MutS protein Msh1 (predicted)	GO:0016043	cellular component organization	BP	1	0.602851	1	3.17343	curated	FALSE	FALSE	FALSE
SPAC13F5.01c	mitochondrial MutS protein Msh1 (predicted)	GO:0006996	organelle organization	BP	1	0.397149	1	4.03836	curated	FALSE	FALSE	FALSE
SPAC688.09	mitochondrial carrier, pyrimidine nucleotide Rim2 (predicted)	GO:0006811	ion transport	BP	1	0.627291	1	4.86602		FALSE	TRUE	FALSE
SPAC688.09	mitochondrial carrier, pyrimidine nucleotide Rim2 (predicted)	GO:0006812	cation transport	BP	1	0.154786	1	5.38532		FALSE	TRUE	FALSE
SPAC688.09	mitochondrial carrier, pyrimidine nucleotide Rim2 (predicted)	GO:0016043	cellular component organization	BP	1	0.268839	1	3.17343		FALSE	TRUE	FALSE
SPAC227.09	folylpolyglutamate synthase Fol3 (predicted)	GO:0051186	obsolete cofactor metabolic process	BP	1	0.12831	1	10.6218		FALSE	TRUE	FALSE
SPAC227.09	folylpolyglutamate synthase Fol3 (predicted)	GO:1901362	organic cyclic compound biosynthetic process	BP	1	0.177189	1	4.35078	automatic	FALSE	TRUE	FALSE
SPAC227.09	folylpolyglutamate synthase Fol3 (predicted)	GO:0044281	small molecule metabolic process	BP	1	0.376782	1	3.83054	automatic	FALSE	TRUE	FALSE
SPAC227.09	folylpolyglutamate synthase Fol3 (predicted)	GO:0044283	small molecule biosynthetic process	BP	1	0.144603	1	4.73844	automatic	FALSE	TRUE	FALSE
SPAC227.09	folylpolyglutamate synthase Fol3 (predicted)	GO:0043436	oxoacid metabolic process	BP	1	0.189409	1	4.4949	automatic	FALSE	TRUE	FALSE
SPAC227.09	folylpolyglutamate synthase Fol3 (predicted)	GO:0016053	organic acid biosynthetic process	BP	1	0.173116	1	5.22814	automatic	FALSE	TRUE	FALSE
SPAC227.09	folylpolyglutamate synthase Fol3 (predicted)	GO:0046394	carboxylic acid biosynthetic process	BP	1	0.114053	1	5.22814	automatic	FALSE	TRUE	FALSE
SPAC227.09	folylpolyglutamate synthase Fol3 (predicted)	GO:0018130	heterocycle biosynthetic process	BP	1	0.144603	1	4.44798	automatic	FALSE	TRUE	FALSE
SPAC227.09	folylpolyglutamate synthase Fol3 (predicted)	GO:0006082	organic acid metabolic process	BP	1	0.215886	1	4.49054	automatic	FALSE	TRUE	FALSE
SPAC227.09	folylpolyglutamate synthase Fol3 (predicted)	GO:1901566	organonitrogen compound biosynthetic process	BP	1	0.195519	1	3.94847	automatic	FALSE	TRUE	FALSE
SPAC227.09	folylpolyglutamate synthase Fol3 (predicted)	GO:0044271	cellular nitrogen compound biosynthetic process	BP	1	0.205703	1	3.90396	automatic	FALSE	TRUE	FALSE
SPAC227.09	folylpolyglutamate synthase Fol3 (predicted)	GO:0019752	carboxylic acid metabolic process	BP	1	0.234216	1	4.5103	automatic	FALSE	TRUE	FALSE
SPAC227.09	folylpolyglutamate synthase Fol3 (predicted)	GO:0019438	aromatic compound biosynthetic process	BP	1	0.179226	1	4.48404	automatic	FALSE	TRUE	FALSE
SPBC776.04	COPII cargo receptor subunit Sec23b (predicted)	GO:0050794	regulation of cellular process	BP	1	0.138493	1	2.8982		FALSE	TRUE	FALSE
SPBC776.04	COPII cargo receptor subunit Sec23b (predicted)	GO:0016043	cellular component organization	BP	1	0.144603	1	3.17343	automatic	FALSE	TRUE	FALSE
SPAC824.02	GPI inositol deacylase Bst1 (predicted)	GO:0019538	protein metabolic process	BP	1	0.252546	1	3.49327		FALSE	TRUE	FALSE
SPCC63.12c	20S proteasome complex subunit beta 3, Pup3	GO:0006508	proteolysis	BP	1	0.737271	1	4.78112	automatic	FALSE	TRUE	FALSE
SPCC63.12c	20S proteasome complex subunit beta 3, Pup3	GO:0019538	protein metabolic process	BP	1	0.737271	1	3.49327	automatic	FALSE	TRUE	FALSE
SPBC582.08	alanine aminotransferase (predicted)	GO:1901575	organic substance catabolic process	BP	1	0.136456	1	4.16657	automatic	FALSE	TRUE	FALSE
SPBC582.08	alanine aminotransferase (predicted)	GO:0009056	catabolic process	BP	1	0.112016	1	4.05509	automatic	FALSE	TRUE	FALSE
SPBC582.08	alanine aminotransferase (predicted)	GO:0044282	small molecule catabolic process	BP	1	0.136456	1	6.00665	automatic	FALSE	TRUE	FALSE
SPBC19C2.01	ATP-dependent RNA helicase Cdc28	GO:0006396	RNA processing	BP	1	0.462322	1	4.40317	curated	FALSE	TRUE	FALSE
SPBC19C2.01	ATP-dependent RNA helicase Cdc28	GO:0034470	ncRNA processing	BP	1	0.164969	1	4.85971		FALSE	TRUE	FALSE
SPBC19C2.01	ATP-dependent RNA helicase Cdc28	GO:0016070	RNA metabolic process	BP	1	0.539715	1	3.70307	curated	FALSE	TRUE	FALSE
SPBC19C2.01	ATP-dependent RNA helicase Cdc28	GO:0034660	ncRNA metabolic process	BP	1	0.152749	1	4.55334		FALSE	TRUE	FALSE
SPBC19C2.01	ATP-dependent RNA helicase Cdc28	GO:0008380	RNA splicing	BP	1	0.252546	1	5.87683	curated	FALSE	TRUE	FALSE
SPBC19C2.01	ATP-dependent RNA helicase Cdc28	GO:0090304	nucleic acid metabolic process	BP	1	0.578411	1	3.20299	curated	FALSE	TRUE	FALSE
SPBC1861.09	serine/threonine protein kinase Ppk22 (predicted)	GO:0006796	phosphate-containing compound metabolic process	BP	1	0.11609	1	4.57439		FALSE	FALSE	FALSE
SPBC1861.09	serine/threonine protein kinase Ppk22 (predicted)	GO:0043412	macromolecule modification	BP	1	0.112016	1	4.03422		FALSE	FALSE	FALSE
SPBC1861.09	serine/threonine protein kinase Ppk22 (predicted)	GO:0044267	cellular protein metabolic process	BP	1	0.1222	1	3.76847		FALSE	FALSE	FALSE
SPCC1235.09	Set3 complex subunit Hif2	GO:0006950	response to stress	BP	1	0.10998	1	4.13256		FALSE	TRUE	FALSE
SPCC1235.09	Set3 complex subunit Hif2	GO:0050896	response to stimulus	BP	1	0.114053	1	4.04113		FALSE	TRUE	FALSE
SPBC4B4.03	RSC complex subunit Rsc1	GO:0050896	response to stimulus	BP	1	0.126273	1	4.04113		FALSE	TRUE	FALSE
SPBC4B4.03	RSC complex subunit Rsc1	GO:0006259	DNA metabolic process	BP	1	0.14664	1	4.14019		FALSE	TRUE	FALSE
SPBC4B4.03	RSC complex subunit Rsc1	GO:0006950	response to stress	BP	1	0.1222	1	4.13256		FALSE	TRUE	FALSE
SPBC4B4.03	RSC complex subunit Rsc1	GO:0033554	cellular response to stress	BP	1	0.144603	1	4.13866		FALSE	TRUE	FALSE
SPBC4B4.03	RSC complex subunit Rsc1	GO:0051716	cellular response to stimulus	BP	1	0.10998	1	4.04948		FALSE	TRUE	FALSE
SPBC4B4.03	RSC complex subunit Rsc1	GO:0043933	protein-containing complex subunit organization	BP	1	0.154786	1	4.76383		FALSE	TRUE	FALSE
SPBC4B4.03	RSC complex subunit Rsc1	GO:0050794	regulation of cellular process	BP	1	0.720978	1	2.8982		FALSE	TRUE	FALSE
SPAC16A10.04	Rho family GTPase Rho4	GO:0032956	regulation of actin cytoskeleton organization	BP	1	0.114053	1	5.92129	experimental	FALSE	TRUE	FALSE
SPCC1682.10	19S proteasome regulatory subunit Rpn8	GO:0050896	response to stimulus	BP	1	0.10998	1	4.04113		FALSE	TRUE	FALSE
SPAC1687.11	rRNA methyltransferase Spb1 (predicted)	GO:0043414	macromolecule methylation	BP	1	0.384929	1	6.14443	automatic	FALSE	TRUE	FALSE
SPAC1687.11	rRNA methyltransferase Spb1 (predicted)	GO:0009451	RNA modification	BP	1	0.525458	1	5.68012	automatic	FALSE	TRUE	FALSE
SPAC1687.11	rRNA methyltransferase Spb1 (predicted)	GO:0043412	macromolecule modification	BP	1	0.374745	1	4.03422	automatic	FALSE	TRUE	FALSE
SPAC1687.11	rRNA methyltransferase Spb1 (predicted)	GO:0032259	methylation	BP	1	0.413442	1	6.14443	automatic	FALSE	TRUE	FALSE
SPAC343.01c	phosphomevalonate kinase Erg8 (predicted)	GO:0006793	phosphorus metabolic process	BP	1	0.10387	1	4.53955	automatic	FALSE	FALSE	FALSE
SPAC1805.02c	electron transfer flavoprotein beta subunit EtfB (predicted)	GO:1901575	organic substance catabolic process	BP	1	0.105906	1	4.16657		FALSE	TRUE	FALSE
SPAC1805.02c	electron transfer flavoprotein beta subunit EtfB (predicted)	GO:0044281	small molecule metabolic process	BP	1	0.364562	1	3.83054		FALSE	TRUE	FALSE
SPAC1805.02c	electron transfer flavoprotein beta subunit EtfB (predicted)	GO:0043436	oxoacid metabolic process	BP	1	0.224033	1	4.4949		FALSE	TRUE	FALSE
SPAC1805.02c	electron transfer flavoprotein beta subunit EtfB (predicted)	GO:0019752	carboxylic acid metabolic process	BP	1	0.268839	1	4.5103		FALSE	TRUE	FALSE
SPAC1805.02c	electron transfer flavoprotein beta subunit EtfB (predicted)	GO:0006082	organic acid metabolic process	BP	1	0.228106	1	4.49054		FALSE	TRUE	FALSE
SPAC14C4.02c	Smc5-6 complex SMC P-loop ATPase subunit Smc5	GO:0050794	regulation of cellular process	BP	1	0.215886	1	2.8982		FALSE	TRUE	FALSE
SPAC14C4.02c	Smc5-6 complex SMC P-loop ATPase subunit Smc5	GO:0006310	DNA recombination	BP	1	0.193483	1	5.63816	automatic	FALSE	TRUE	FALSE
SPAC14C4.02c	Smc5-6 complex SMC P-loop ATPase subunit Smc5	GO:0006996	organelle organization	BP	1	0.505092	1	4.03836		FALSE	TRUE	FALSE
SPAC14C4.02c	Smc5-6 complex SMC P-loop ATPase subunit Smc5	GO:0016043	cellular component organization	BP	1	0.431772	1	3.17343		FALSE	TRUE	FALSE
SPAC14C4.02c	Smc5-6 complex SMC P-loop ATPase subunit Smc5	GO:0051276	chromosome organization	BP	1	0.331976	1	4.85033		FALSE	TRUE	FALSE
SPAC14C4.02c	Smc5-6 complex SMC P-loop ATPase subunit Smc5	GO:0006281	DNA repair	BP	1	0.423625	1	5.09234	curated	FALSE	TRUE	FALSE
SPAC694.02	DEAD/DEAH box helicase, human DDL60 and DDL60L ortholog, implicated in mRNA degradation	GO:0050896	response to stimulus	BP	1	0.138493	1	4.04113		TRUE	TRUE	TRUE
SPBC17G9.06c	siderophore-iron biosynthesis protein (predicted)	GO:0044281	small molecule metabolic process	BP	1	0.238289	1	3.83054		FALSE	FALSE	FALSE
SPBC17G9.06c	siderophore-iron biosynthesis protein (predicted)	GO:0044283	small molecule biosynthetic process	BP	1	0.101833	1	4.73844		FALSE	FALSE	FALSE
SPBC17G9.06c	siderophore-iron biosynthesis protein (predicted)	GO:0043436	oxoacid metabolic process	BP	1	0.11609	1	4.4949		FALSE	FALSE	FALSE
SPBC17G9.06c	siderophore-iron biosynthesis protein (predicted)	GO:0006082	organic acid metabolic process	BP	1	0.107943	1	4.49054		FALSE	FALSE	FALSE
SPBC17G9.06c	siderophore-iron biosynthesis protein (predicted)	GO:0019752	carboxylic acid metabolic process	BP	1	0.114053	1	4.5103		FALSE	FALSE	FALSE
SPCC1183.05c	DNA repair ligase Lig4	GO:0006310	DNA recombination	BP	1	0.191446	1	5.63816	automatic	FALSE	TRUE	FALSE
SPCC1183.05c	DNA repair ligase Lig4	GO:0006259	DNA metabolic process	BP	1	0.600815	1	4.14019	automatic	FALSE	TRUE	FALSE
SPCC1183.05c	DNA repair ligase Lig4	GO:0090304	nucleic acid metabolic process	BP	1	0.529532	1	3.20299	automatic	FALSE	TRUE	FALSE
SPAC3H5.06c	DNA polymerase alpha catalytic subunit	GO:0006281	DNA repair	BP	1	0.207739	1	5.09234	experimental	FALSE	TRUE	FALSE
SPAC922.05c	transmembrane transporter (predicted)	GO:0071702	organic substance transport	BP	1	0.224033	1	4.15874		FALSE	FALSE	FALSE
SPAC922.05c	transmembrane transporter (predicted)	GO:0051179	localization	BP	1	0.323829	1	3.1988	automatic	FALSE	FALSE	FALSE
SPAC922.05c	transmembrane transporter (predicted)	GO:0051234	establishment of localization	BP	1	0.303462	1	3.47657	automatic	FALSE	FALSE	FALSE
SPAC922.05c	transmembrane transporter (predicted)	GO:0006810	transport	BP	1	0.283096	1	3.50456	automatic	FALSE	FALSE	FALSE
SPAC1006.09	MAP kinase kinase kinase Win1	GO:0070887	cellular response to chemical stimulus	BP	1	0.118126	1	5.64503	experimental	FALSE	TRUE	FALSE
SPAC1B3.15c	transmembrane transporter (predicted)	GO:0098656	anion transmembrane transport	BP	1	0.175153	1	5.70179		FALSE	FALSE	FALSE
SPAC1B3.15c	transmembrane transporter (predicted)	GO:1903825	organic acid transmembrane transport	BP	1	0.224033	1	6.12196		FALSE	FALSE	FALSE
SPAC1B3.15c	transmembrane transporter (predicted)	GO:0071702	organic substance transport	BP	1	0.334012	1	4.15874		FALSE	FALSE	FALSE
SPAC1B3.15c	transmembrane transporter (predicted)	GO:0015849	organic acid transport	BP	1	0.162933	1	6.11091		FALSE	FALSE	FALSE
SPAC1B3.15c	transmembrane transporter (predicted)	GO:0046942	carboxylic acid transport	BP	1	0.189409	1	6.11091		FALSE	FALSE	FALSE
SPAC1B3.15c	transmembrane transporter (predicted)	GO:0071705	nitrogen compound transport	BP	1	0.199593	1	4.27088		FALSE	FALSE	FALSE
SPAC1B3.15c	transmembrane transporter (predicted)	GO:0006820	anion transport	BP	1	0.209776	1	5.55286		FALSE	FALSE	FALSE
SPAC1B3.15c	transmembrane transporter (predicted)	GO:0034220	ion transmembrane transport	BP	1	0.411405	1	4.98698		FALSE	FALSE	FALSE
SPAC1B3.15c	transmembrane transporter (predicted)	GO:0006811	ion transport	BP	1	0.315682	1	4.86602		FALSE	FALSE	FALSE
SPAC1B3.15c	transmembrane transporter (predicted)	GO:0015711	organic anion transport	BP	1	0.177189	1	5.69451		FALSE	FALSE	FALSE
SPAC1B3.15c	transmembrane transporter (predicted)	GO:0055085	transmembrane transport	BP	1	0.352342	1	4.56264	curated	FALSE	FALSE	FALSE
SPCC1259.15c	ubiquitin conjugating enzyme E2, Ubc11/UbcP4	GO:0006511	ubiquitin-dependent protein catabolic process	BP	1	0.264766	1	5.25113	experimental	FALSE	TRUE	FALSE
SPAC644.18c	TRAPP complex subunit Bet3 (predicted)	GO:0007034	vacuolar transport	BP	1	0.14053	1	5.68729		FALSE	TRUE	FALSE
SPAC57A10.03	cyclophilin family peptidyl-prolyl cis-trans isomerase Cyp1	GO:0000398	mRNA splicing, via spliceosome	BP	1	0.276986	1	5.91224		FALSE	TRUE	FALSE
SPAC57A10.03	cyclophilin family peptidyl-prolyl cis-trans isomerase Cyp1	GO:0006396	RNA processing	BP	1	0.256619	1	4.40317		FALSE	TRUE	FALSE
SPAC57A10.03	cyclophilin family peptidyl-prolyl cis-trans isomerase Cyp1	GO:0000377	RNA splicing, via transesterification reactions with bulged adenosine as nucleophile	BP	1	0.260692	1	5.91224		FALSE	TRUE	FALSE
SPAC57A10.03	cyclophilin family peptidyl-prolyl cis-trans isomerase Cyp1	GO:0016071	mRNA metabolic process	BP	1	0.258656	1	4.88519		FALSE	TRUE	FALSE
SPAC57A10.03	cyclophilin family peptidyl-prolyl cis-trans isomerase Cyp1	GO:0016070	RNA metabolic process	BP	1	0.291242	1	3.70307		FALSE	TRUE	FALSE
SPAC57A10.03	cyclophilin family peptidyl-prolyl cis-trans isomerase Cyp1	GO:0008380	RNA splicing	BP	1	0.279022	1	5.87683		FALSE	TRUE	FALSE
SPAC57A10.03	cyclophilin family peptidyl-prolyl cis-trans isomerase Cyp1	GO:0090304	nucleic acid metabolic process	BP	1	0.354379	1	3.20299		FALSE	TRUE	FALSE
SPAC57A10.03	cyclophilin family peptidyl-prolyl cis-trans isomerase Cyp1	GO:0000375	RNA splicing, via transesterification reactions	BP	1	0.313646	1	5.89438		FALSE	TRUE	FALSE
SPAC2G11.11c	ATP-dependent RNA helicase Prh1 (predicted)	GO:0000398	mRNA splicing, via spliceosome	BP	1	0.211813	1	5.91224		FALSE	TRUE	FALSE
SPAC2G11.11c	ATP-dependent RNA helicase Prh1 (predicted)	GO:0006396	RNA processing	BP	1	0.562118	1	4.40317		FALSE	TRUE	FALSE
SPAC2G11.11c	ATP-dependent RNA helicase Prh1 (predicted)	GO:0006397	mRNA processing	BP	1	0.187373	1	5.63816		FALSE	TRUE	FALSE
SPAC2G11.11c	ATP-dependent RNA helicase Prh1 (predicted)	GO:0000377	RNA splicing, via transesterification reactions with bulged adenosine as nucleophile	BP	1	0.197556	1	5.91224		FALSE	TRUE	FALSE
SPAC2G11.11c	ATP-dependent RNA helicase Prh1 (predicted)	GO:0016071	mRNA metabolic process	BP	1	0.201629	1	4.88519		FALSE	TRUE	FALSE
SPAC2G11.11c	ATP-dependent RNA helicase Prh1 (predicted)	GO:0016070	RNA metabolic process	BP	1	0.610998	1	3.70307		FALSE	TRUE	FALSE
SPAC2G11.11c	ATP-dependent RNA helicase Prh1 (predicted)	GO:0008380	RNA splicing	BP	1	0.138493	1	5.87683		FALSE	TRUE	FALSE
SPAC2G11.11c	ATP-dependent RNA helicase Prh1 (predicted)	GO:0090304	nucleic acid metabolic process	BP	1	0.584521	1	3.20299		FALSE	TRUE	FALSE
SPCC1020.03	mitochondrial iron ion transmembrane transporter Mmt1 (predicted)	GO:0048878	chemical homeostasis	BP	1	0.1222	1	6.00665		FALSE	FALSE	FALSE
SPCC1020.03	mitochondrial iron ion transmembrane transporter Mmt1 (predicted)	GO:0019725	cellular homeostasis	BP	1	0.234216	1	5.90327		FALSE	FALSE	FALSE
SPCC1020.03	mitochondrial iron ion transmembrane transporter Mmt1 (predicted)	GO:0030003	cellular cation homeostasis	BP	1	0.142566	1	6.16742		FALSE	FALSE	FALSE
SPCC1020.03	mitochondrial iron ion transmembrane transporter Mmt1 (predicted)	GO:0055080	cation homeostasis	BP	1	0.189409	1	6.08917		FALSE	FALSE	FALSE
SPCC1020.03	mitochondrial iron ion transmembrane transporter Mmt1 (predicted)	GO:0006873	cellular ion homeostasis	BP	1	0.148676	1	6.13313		FALSE	FALSE	FALSE
SPCC1020.03	mitochondrial iron ion transmembrane transporter Mmt1 (predicted)	GO:0050801	ion homeostasis	BP	1	0.126273	1	6.0368		FALSE	FALSE	FALSE
SPCC1020.03	mitochondrial iron ion transmembrane transporter Mmt1 (predicted)	GO:0055082	cellular chemical homeostasis	BP	1	0.232179	1	6.09998		FALSE	FALSE	FALSE
SPCC1020.03	mitochondrial iron ion transmembrane transporter Mmt1 (predicted)	GO:0042592	homeostatic process	BP	1	0.120163	1	5.40141		FALSE	FALSE	FALSE
SPCC1020.03	mitochondrial iron ion transmembrane transporter Mmt1 (predicted)	GO:0098771	inorganic ion homeostasis	BP	1	0.203666	1	6.08917		FALSE	FALSE	FALSE
SPAC637.13c	cytoskeletal signaling protein Slm1 (predicted)	GO:0051641	cellular localization	BP	1	0.203666	1	3.67383		FALSE	FALSE	FALSE
SPAC637.13c	cytoskeletal signaling protein Slm1 (predicted)	GO:0033036	macromolecule localization	BP	1	0.150713	1	4.13408		FALSE	FALSE	FALSE
SPAC637.13c	cytoskeletal signaling protein Slm1 (predicted)	GO:0070727	cellular macromolecule localization	BP	1	0.112016	1	4.47116		FALSE	FALSE	FALSE
SPAC637.13c	cytoskeletal signaling protein Slm1 (predicted)	GO:0008104	protein localization	BP	1	0.167006	1	4.14326		FALSE	FALSE	FALSE
SPAC637.13c	cytoskeletal signaling protein Slm1 (predicted)	GO:0051179	localization	BP	1	0.311609	1	3.1988		FALSE	FALSE	FALSE
SPAC637.13c	cytoskeletal signaling protein Slm1 (predicted)	GO:0051234	establishment of localization	BP	1	0.272912	1	3.47657		FALSE	FALSE	FALSE
SPAC637.13c	cytoskeletal signaling protein Slm1 (predicted)	GO:0006810	transport	BP	1	0.197556	1	3.50456		FALSE	FALSE	FALSE
SPBC839.14c	elongation factor EF-1 alpha (eEF1A) l methyltransferase Efm4 (predicted)	GO:0043414	macromolecule methylation	BP	1	0.167006	1	6.14443		FALSE	TRUE	FALSE
SPBC839.14c	elongation factor EF-1 alpha (eEF1A) l methyltransferase Efm4 (predicted)	GO:0043412	macromolecule modification	BP	1	0.158859	1	4.03422		FALSE	TRUE	FALSE
SPBC839.14c	elongation factor EF-1 alpha (eEF1A) l methyltransferase Efm4 (predicted)	GO:0032259	methylation	BP	1	0.14053	1	6.14443		FALSE	TRUE	FALSE
SPBC839.14c	elongation factor EF-1 alpha (eEF1A) l methyltransferase Efm4 (predicted)	GO:0019538	protein metabolic process	BP	1	0.120163	1	3.49327		FALSE	TRUE	FALSE
SPBC839.14c	elongation factor EF-1 alpha (eEF1A) l methyltransferase Efm4 (predicted)	GO:0051234	establishment of localization	BP	1	0.118126	1	3.47657	automatic	FALSE	TRUE	FALSE
SPBC839.14c	elongation factor EF-1 alpha (eEF1A) l methyltransferase Efm4 (predicted)	GO:0006810	transport	BP	1	0.12831	1	3.50456	automatic	FALSE	TRUE	FALSE
SPBC839.14c	elongation factor EF-1 alpha (eEF1A) l methyltransferase Efm4 (predicted)	GO:0051179	localization	BP	1	0.209776	1	3.1988	automatic	FALSE	TRUE	FALSE
SPCC417.10	dipeptide transmembrane transporter Dal5h1 (predicted)	GO:0046942	carboxylic acid transport	BP	1	0.213849	1	6.11091		FALSE	TRUE	FALSE
SPCC417.10	dipeptide transmembrane transporter Dal5h1 (predicted)	GO:0015711	organic anion transport	BP	1	0.238289	1	5.69451		FALSE	TRUE	FALSE
SPCC417.10	dipeptide transmembrane transporter Dal5h1 (predicted)	GO:0006811	ion transport	BP	1	0.240326	1	4.86602		FALSE	TRUE	FALSE
SPCC417.10	dipeptide transmembrane transporter Dal5h1 (predicted)	GO:0006820	anion transport	BP	1	0.323829	1	5.55286		FALSE	TRUE	FALSE
SPCC417.10	dipeptide transmembrane transporter Dal5h1 (predicted)	GO:0015849	organic acid transport	BP	1	0.203666	1	6.11091		FALSE	TRUE	FALSE
SPAC23C4.14	mannosyltransferase complex subunit Alg1 (predicted)	GO:0006464	cellular protein modification process	BP	1	0.378819	1	4.25702	curated	FALSE	TRUE	FALSE
SPAC23C4.14	mannosyltransferase complex subunit Alg1 (predicted)	GO:0036211	protein modification process	BP	1	0.331976	1	4.25702	curated	FALSE	TRUE	FALSE
SPAC23C4.14	mannosyltransferase complex subunit Alg1 (predicted)	GO:0043412	macromolecule modification	BP	1	0.368635	1	4.03422	curated	FALSE	TRUE	FALSE
SPAC23C4.14	mannosyltransferase complex subunit Alg1 (predicted)	GO:0044267	cellular protein metabolic process	BP	1	0.226069	1	3.76847	curated	FALSE	TRUE	FALSE
SPAC23C4.14	mannosyltransferase complex subunit Alg1 (predicted)	GO:0019538	protein metabolic process	BP	1	0.299389	1	3.49327	curated	FALSE	TRUE	FALSE
SPAC19A8.07c	U3 snoRNP-associated protein Imp4 (predicted)	GO:0006364	rRNA processing	BP	1	0.350305	1	5.35391	curated	FALSE	TRUE	FALSE
SPAC19A8.07c	U3 snoRNP-associated protein Imp4 (predicted)	GO:0044085	cellular component biogenesis	BP	1	0.101833	1	5.63133	curated	FALSE	TRUE	FALSE
SPAC1687.21	fructose-2,6-bisphosphatase, human TIGAR ortholog (predicted)	GO:0006796	phosphate-containing compound metabolic process	BP	1	0.352342	1	4.57439	curated	FALSE	TRUE	FALSE
SPAC1687.21	fructose-2,6-bisphosphatase, human TIGAR ortholog (predicted)	GO:0006793	phosphorus metabolic process	BP	1	0.228106	1	4.53955	curated	FALSE	TRUE	FALSE
SPAC3F10.16c	GTP binding protein, HSR1-related (predicted)	GO:0006396	RNA processing	BP	1	0.215886	1	4.40317		FALSE	TRUE	FALSE
SPAC3F10.16c	GTP binding protein, HSR1-related (predicted)	GO:0034470	ncRNA processing	BP	1	0.439919	1	4.85971		FALSE	TRUE	FALSE
SPAC3F10.16c	GTP binding protein, HSR1-related (predicted)	GO:0016070	RNA metabolic process	BP	1	0.397149	1	3.70307		FALSE	TRUE	FALSE
SPAC3F10.16c	GTP binding protein, HSR1-related (predicted)	GO:0016072	rRNA metabolic process	BP	1	0.193483	1	5.21012		FALSE	TRUE	FALSE
SPAC3F10.16c	GTP binding protein, HSR1-related (predicted)	GO:0034660	ncRNA metabolic process	BP	1	0.409369	1	4.55334		FALSE	TRUE	FALSE
SPAC3F10.16c	GTP binding protein, HSR1-related (predicted)	GO:0090304	nucleic acid metabolic process	BP	1	0.433809	1	3.20299		FALSE	TRUE	FALSE
SPAC1F12.02c	translationally controlled tumor protein homolog Tma19/Tpt1	GO:0051128	regulation of cellular component organization	BP	1	0.114053	1	4.49927		FALSE	TRUE	FALSE
SPAC1F12.02c	translationally controlled tumor protein homolog Tma19/Tpt1	GO:0050794	regulation of cellular process	BP	1	0.213849	1	2.8982		FALSE	TRUE	FALSE
SPCC576.15c	serine/threonine protein kinase Ksg1	GO:0006464	cellular protein modification process	BP	1	0.191446	1	4.25702		FALSE	TRUE	FALSE
SPCC576.15c	serine/threonine protein kinase Ksg1	GO:0006796	phosphate-containing compound metabolic process	BP	1	0.132383	1	4.57439		FALSE	TRUE	FALSE
SPCC576.15c	serine/threonine protein kinase Ksg1	GO:0043412	macromolecule modification	BP	1	0.148676	1	4.03422		FALSE	TRUE	FALSE
SPCC576.15c	serine/threonine protein kinase Ksg1	GO:0019538	protein metabolic process	BP	1	0.150713	1	3.49327		FALSE	TRUE	FALSE
SPCC576.15c	serine/threonine protein kinase Ksg1	GO:0007165	signal transduction	BP	1	0.562118	1	4.83487	curated	FALSE	TRUE	FALSE
SPCC576.15c	serine/threonine protein kinase Ksg1	GO:0006793	phosphorus metabolic process	BP	1	0.120163	1	4.53955		FALSE	TRUE	FALSE
SPCC576.15c	serine/threonine protein kinase Ksg1	GO:0036211	protein modification process	BP	1	0.230143	1	4.25702		FALSE	TRUE	FALSE
SPCC576.15c	serine/threonine protein kinase Ksg1	GO:0035556	intracellular signal transduction	BP	1	0.344196	1	5.19242		FALSE	TRUE	FALSE
SPCC576.15c	serine/threonine protein kinase Ksg1	GO:0044267	cellular protein metabolic process	BP	1	0.132383	1	3.76847		FALSE	TRUE	FALSE
SPCC830.10	nucleoside triphosphatase Ham1 (predicted)	GO:0009259	ribonucleotide metabolic process	BP	1	0.10998	1	5.83427		FALSE	TRUE	FALSE
SPCC830.10	nucleoside triphosphatase Ham1 (predicted)	GO:1901362	organic cyclic compound biosynthetic process	BP	1	0.389002	1	4.35078	automatic	FALSE	TRUE	FALSE
SPCC830.10	nucleoside triphosphatase Ham1 (predicted)	GO:0019637	organophosphate metabolic process	BP	1	0.195519	1	4.75247	automatic	FALSE	TRUE	FALSE
SPCC830.10	nucleoside triphosphatase Ham1 (predicted)	GO:0006796	phosphate-containing compound metabolic process	BP	1	0.183299	1	4.57439	automatic	FALSE	TRUE	FALSE
SPCC830.10	nucleoside triphosphatase Ham1 (predicted)	GO:0018130	heterocycle biosynthetic process	BP	1	0.348269	1	4.44798	automatic	FALSE	TRUE	FALSE
SPCC830.10	nucleoside triphosphatase Ham1 (predicted)	GO:0055086	nucleobase-containing small molecule metabolic process	BP	1	0.189409	1	5.04582	automatic	FALSE	TRUE	FALSE
SPCC830.10	nucleoside triphosphatase Ham1 (predicted)	GO:0006793	phosphorus metabolic process	BP	1	0.173116	1	4.53955	automatic	FALSE	TRUE	FALSE
SPCC830.10	nucleoside triphosphatase Ham1 (predicted)	GO:0044271	cellular nitrogen compound biosynthetic process	BP	1	0.358452	1	3.90396	automatic	FALSE	TRUE	FALSE
SPCC830.10	nucleoside triphosphatase Ham1 (predicted)	GO:0044248	cellular catabolic process	BP	1	0.114053	1	4.14326	automatic	FALSE	TRUE	FALSE
SPCC830.10	nucleoside triphosphatase Ham1 (predicted)	GO:0044281	small molecule metabolic process	BP	1	0.407332	1	3.83054	automatic	FALSE	TRUE	FALSE
SPCC830.10	nucleoside triphosphatase Ham1 (predicted)	GO:1901135	carbohydrate derivative metabolic process	BP	1	0.156823	1	4.98698		FALSE	TRUE	FALSE
SPCC830.10	nucleoside triphosphatase Ham1 (predicted)	GO:0044283	small molecule biosynthetic process	BP	1	0.171079	1	4.73844	automatic	FALSE	TRUE	FALSE
SPCC830.10	nucleoside triphosphatase Ham1 (predicted)	GO:0009056	catabolic process	BP	1	0.105906	1	4.05509	automatic	FALSE	TRUE	FALSE
SPCC830.10	nucleoside triphosphatase Ham1 (predicted)	GO:0006753	nucleoside phosphate metabolic process	BP	1	0.162933	1	5.36427	automatic	FALSE	TRUE	FALSE
SPCC830.10	nucleoside triphosphatase Ham1 (predicted)	GO:0009117	nucleotide metabolic process	BP	1	0.169043	1	5.41228		FALSE	TRUE	FALSE
SPCC830.10	nucleoside triphosphatase Ham1 (predicted)	GO:0034654	nucleobase-containing compound biosynthetic process	BP	1	0.264766	1	4.71913	automatic	FALSE	TRUE	FALSE
SPCC830.10	nucleoside triphosphatase Ham1 (predicted)	GO:0019438	aromatic compound biosynthetic process	BP	1	0.315682	1	4.48404	automatic	FALSE	TRUE	FALSE
SPCC830.10	nucleoside triphosphatase Ham1 (predicted)	GO:0019693	ribose phosphate metabolic process	BP	1	0.1222	1	5.80958		FALSE	TRUE	FALSE
SPCC4G3.17	GMP 5'-nucleotidase (predicted)	GO:0044271	cellular nitrogen compound biosynthetic process	BP	1	0.213849	1	3.90396		FALSE	TRUE	FALSE
SPCC4G3.17	GMP 5'-nucleotidase (predicted)	GO:1901362	organic cyclic compound biosynthetic process	BP	1	0.203666	1	4.35078		FALSE	TRUE	FALSE
SPCC4G3.17	GMP 5'-nucleotidase (predicted)	GO:0044283	small molecule biosynthetic process	BP	1	0.169043	1	4.73844		FALSE	TRUE	FALSE
SPCC4G3.17	GMP 5'-nucleotidase (predicted)	GO:0034654	nucleobase-containing compound biosynthetic process	BP	1	0.101833	1	4.71913		FALSE	TRUE	FALSE
SPCC4G3.17	GMP 5'-nucleotidase (predicted)	GO:0018130	heterocycle biosynthetic process	BP	1	0.167006	1	4.44798		FALSE	TRUE	FALSE
SPCC4G3.17	GMP 5'-nucleotidase (predicted)	GO:0019438	aromatic compound biosynthetic process	BP	1	0.150713	1	4.48404		FALSE	TRUE	FALSE
SPCC61.01c	plasma membrane siderophore-iron transmembrane transporter Str2	GO:0051234	establishment of localization	BP	1	0.258656	1	3.47657	curated	FALSE	FALSE	FALSE
SPCC61.01c	plasma membrane siderophore-iron transmembrane transporter Str2	GO:0006810	transport	BP	1	0.236253	1	3.50456	curated	FALSE	FALSE	FALSE
SPCC61.01c	plasma membrane siderophore-iron transmembrane transporter Str2	GO:0006811	ion transport	BP	1	0.148676	1	4.86602	curated	FALSE	FALSE	FALSE
SPCC61.01c	plasma membrane siderophore-iron transmembrane transporter Str2	GO:0006812	cation transport	BP	1	0.11609	1	5.38532	curated	FALSE	FALSE	FALSE
SPCC61.01c	plasma membrane siderophore-iron transmembrane transporter Str2	GO:0051179	localization	BP	1	0.248473	1	3.1988	curated	FALSE	FALSE	FALSE
SPCC5E4.05c	mitochondrial acylglycerol lipase Mgl1 (predicted)	GO:0050794	regulation of cellular process	BP	1	0.101833	1	2.8982		FALSE	TRUE	FALSE
SPCC757.13	dipeptide transmembrane transporter (predicted)	GO:0046942	carboxylic acid transport	BP	1	0.156823	1	6.11091		FALSE	TRUE	FALSE
SPCC757.13	dipeptide transmembrane transporter (predicted)	GO:0015711	organic anion transport	BP	1	0.160896	1	5.69451		FALSE	TRUE	FALSE
SPCC757.13	dipeptide transmembrane transporter (predicted)	GO:0006811	ion transport	BP	1	0.228106	1	4.86602		FALSE	TRUE	FALSE
SPCC757.13	dipeptide transmembrane transporter (predicted)	GO:0006820	anion transport	BP	1	0.205703	1	5.55286		FALSE	TRUE	FALSE
SPCC757.13	dipeptide transmembrane transporter (predicted)	GO:0015849	organic acid transport	BP	1	0.171079	1	6.11091		FALSE	TRUE	FALSE
SPBC1773.15	dipeptide transmembrane transporter Dal5h2 (predicted)	GO:0046942	carboxylic acid transport	BP	1	0.191446	1	6.11091		FALSE	TRUE	FALSE
SPBC1773.15	dipeptide transmembrane transporter Dal5h2 (predicted)	GO:0015711	organic anion transport	BP	1	0.175153	1	5.69451		FALSE	TRUE	FALSE
SPBC1773.15	dipeptide transmembrane transporter Dal5h2 (predicted)	GO:0006811	ion transport	BP	1	0.162933	1	4.86602		FALSE	TRUE	FALSE
SPBC1773.15	dipeptide transmembrane transporter Dal5h2 (predicted)	GO:0071705	nitrogen compound transport	BP	1	0.203666	1	4.27088		FALSE	TRUE	FALSE
SPBC1773.15	dipeptide transmembrane transporter Dal5h2 (predicted)	GO:0071702	organic substance transport	BP	1	0.266802	1	4.15874		FALSE	TRUE	FALSE
SPBC1773.15	dipeptide transmembrane transporter Dal5h2 (predicted)	GO:0006820	anion transport	BP	1	0.181263	1	5.55286		FALSE	TRUE	FALSE
SPBC1773.15	dipeptide transmembrane transporter Dal5h2 (predicted)	GO:0015849	organic acid transport	BP	1	0.14664	1	6.11091		FALSE	TRUE	FALSE
SPCC1840.05c	phosphoglucomutase (predicted)	GO:1901575	organic substance catabolic process	BP	1	0.144603	1	4.16657		FALSE	TRUE	FALSE
SPCC1840.05c	phosphoglucomutase (predicted)	GO:1901135	carbohydrate derivative metabolic process	BP	1	0.395112	1	4.98698		FALSE	TRUE	FALSE
SPCC1840.05c	phosphoglucomutase (predicted)	GO:0009056	catabolic process	BP	1	0.152749	1	4.05509		FALSE	TRUE	FALSE
SPCC1840.05c	phosphoglucomutase (predicted)	GO:0055086	nucleobase-containing small molecule metabolic process	BP	1	0.281059	1	5.04582		FALSE	TRUE	FALSE
SPCC1840.05c	phosphoglucomutase (predicted)	GO:1901362	organic cyclic compound biosynthetic process	BP	1	0.283096	1	4.35078		FALSE	TRUE	FALSE
SPCC1840.05c	phosphoglucomutase (predicted)	GO:1901137	carbohydrate derivative biosynthetic process	BP	1	0.242363	1	5.45698		FALSE	TRUE	FALSE
SPCC1840.05c	phosphoglucomutase (predicted)	GO:0018130	heterocycle biosynthetic process	BP	1	0.238289	1	4.44798		FALSE	TRUE	FALSE
SPCC1840.05c	phosphoglucomutase (predicted)	GO:1901566	organonitrogen compound biosynthetic process	BP	1	0.132383	1	3.94847		FALSE	TRUE	FALSE
SPCC1840.05c	phosphoglucomutase (predicted)	GO:0044271	cellular nitrogen compound biosynthetic process	BP	1	0.219959	1	3.90396		FALSE	TRUE	FALSE
SPCC1840.05c	phosphoglucomutase (predicted)	GO:0044283	small molecule biosynthetic process	BP	1	0.10998	1	4.73844		FALSE	TRUE	FALSE
SPCC1840.05c	phosphoglucomutase (predicted)	GO:0034654	nucleobase-containing compound biosynthetic process	BP	1	0.10998	1	4.71913		FALSE	TRUE	FALSE
SPCC1840.05c	phosphoglucomutase (predicted)	GO:0019438	aromatic compound biosynthetic process	BP	1	0.240326	1	4.48404		FALSE	TRUE	FALSE
SPBC1271.12	sterol intermembrane transfer protein Kes1 (predicted)	GO:0016192	vesicle-mediated transport	BP	1	0.232179	1	4.73012		FALSE	TRUE	FALSE
SPBC460.05	transmembrane transporter (predicted)	GO:0046942	carboxylic acid transport	BP	1	0.162933	1	6.11091		FALSE	TRUE	FALSE
SPBC460.05	transmembrane transporter (predicted)	GO:0015711	organic anion transport	BP	1	0.219959	1	5.69451		FALSE	TRUE	FALSE
SPBC460.05	transmembrane transporter (predicted)	GO:0006811	ion transport	BP	1	0.289206	1	4.86602		FALSE	TRUE	FALSE
SPBC460.05	transmembrane transporter (predicted)	GO:0071705	nitrogen compound transport	BP	1	0.213849	1	4.27088		FALSE	TRUE	FALSE
SPBC460.05	transmembrane transporter (predicted)	GO:0071702	organic substance transport	BP	1	0.362525	1	4.15874		FALSE	TRUE	FALSE
SPBC460.05	transmembrane transporter (predicted)	GO:0006820	anion transport	BP	1	0.254582	1	5.55286		FALSE	TRUE	FALSE
SPBC460.05	transmembrane transporter (predicted)	GO:0015849	organic acid transport	BP	1	0.14053	1	6.11091		FALSE	TRUE	FALSE
SPAC1805.01c	serine/threonine protein kinase Ppk6 (predicted)	GO:0009892	negative regulation of metabolic process	BP	1	0.197556	1	4.36986		FALSE	TRUE	FALSE
SPAC1805.01c	serine/threonine protein kinase Ppk6 (predicted)	GO:0048519	negative regulation of biological process	BP	1	0.334012	1	3.83054		FALSE	TRUE	FALSE
SPAC1805.01c	serine/threonine protein kinase Ppk6 (predicted)	GO:0060255	regulation of macromolecule metabolic process	BP	1	0.362525	1	3.55445		FALSE	TRUE	FALSE
SPAC1805.01c	serine/threonine protein kinase Ppk6 (predicted)	GO:0031323	regulation of cellular metabolic process	BP	1	0.230143	1	3.69519		FALSE	TRUE	FALSE
SPAC1805.01c	serine/threonine protein kinase Ppk6 (predicted)	GO:0048523	negative regulation of cellular process	BP	1	0.209776	1	4.08943		FALSE	TRUE	FALSE
SPAC1805.01c	serine/threonine protein kinase Ppk6 (predicted)	GO:0031326	regulation of cellular biosynthetic process	BP	1	0.199593	1	3.91981		FALSE	TRUE	FALSE
SPAC1805.01c	serine/threonine protein kinase Ppk6 (predicted)	GO:0019222	regulation of metabolic process	BP	1	0.419552	1	3.51189		FALSE	TRUE	FALSE
SPAC1805.01c	serine/threonine protein kinase Ppk6 (predicted)	GO:2000112	regulation of cellular macromolecule biosynthetic process	BP	1	0.10998	1	3.96376		FALSE	TRUE	FALSE
SPAC1805.01c	serine/threonine protein kinase Ppk6 (predicted)	GO:0080090	regulation of primary metabolic process	BP	1	0.209776	1	3.74241		FALSE	TRUE	FALSE
SPAC1805.01c	serine/threonine protein kinase Ppk6 (predicted)	GO:0010556	regulation of macromolecule biosynthetic process	BP	1	0.154786	1	3.95481		FALSE	TRUE	FALSE
SPAC1805.01c	serine/threonine protein kinase Ppk6 (predicted)	GO:0009889	regulation of biosynthetic process	BP	1	0.167006	1	3.91981		FALSE	TRUE	FALSE
SPAC1805.01c	serine/threonine protein kinase Ppk6 (predicted)	GO:0010605	negative regulation of macromolecule metabolic process	BP	1	0.232179	1	4.41117		FALSE	TRUE	FALSE
SPAC1805.01c	serine/threonine protein kinase Ppk6 (predicted)	GO:0044267	cellular protein metabolic process	BP	1	0.10998	1	3.76847		FALSE	TRUE	FALSE
SPAC1805.01c	serine/threonine protein kinase Ppk6 (predicted)	GO:0019538	protein metabolic process	BP	1	0.14053	1	3.49327		FALSE	TRUE	FALSE
SPBC3B9.08c	exon junction complex subunit, Mago-nashi homolog Mnh1	GO:0019222	regulation of metabolic process	BP	1	0.10387	1	3.51189		FALSE	TRUE	FALSE
SPAC664.09	gamma-glutamyltranspeptidase Ggt1	GO:0043603	cellular amide metabolic process	BP	1	0.13442	1	4.5282	automatic	FALSE	TRUE	FALSE
SPAC227.07c	protein phosphatase PP2A regulatory subunit B-55 Pab1	GO:0051641	cellular localization	BP	1	0.268839	1	3.67383		FALSE	TRUE	FALSE
SPAC227.07c	protein phosphatase PP2A regulatory subunit B-55 Pab1	GO:0033036	macromolecule localization	BP	1	0.207739	1	4.13408		FALSE	TRUE	FALSE
SPAC227.07c	protein phosphatase PP2A regulatory subunit B-55 Pab1	GO:0010468	regulation of gene expression	BP	1	0.105906	1	3.8283		FALSE	TRUE	FALSE
SPAC227.07c	protein phosphatase PP2A regulatory subunit B-55 Pab1	GO:0070727	cellular macromolecule localization	BP	1	0.118126	1	4.47116		FALSE	TRUE	FALSE
SPAC227.07c	protein phosphatase PP2A regulatory subunit B-55 Pab1	GO:0034613	cellular protein localization	BP	1	0.156823	1	4.47758		FALSE	TRUE	FALSE
SPAC227.07c	protein phosphatase PP2A regulatory subunit B-55 Pab1	GO:0008104	protein localization	BP	1	0.181263	1	4.14326		FALSE	TRUE	FALSE
SPAC227.07c	protein phosphatase PP2A regulatory subunit B-55 Pab1	GO:0051179	localization	BP	1	0.256619	1	3.1988		FALSE	TRUE	FALSE
SPAC227.07c	protein phosphatase PP2A regulatory subunit B-55 Pab1	GO:0009889	regulation of biosynthetic process	BP	1	0.107943	1	3.91981		FALSE	TRUE	FALSE
SPAC227.07c	protein phosphatase PP2A regulatory subunit B-55 Pab1	GO:0033044	regulation of chromosome organization	BP	1	0.112016	1	5.17073		FALSE	TRUE	FALSE
SPAC227.07c	protein phosphatase PP2A regulatory subunit B-55 Pab1	GO:1903047	mitotic cell cycle process	BP	1	0.126273	1	4.2553	experimental	FALSE	TRUE	FALSE
SPBPB2B2.05	class I glutamine amidotransferase family protein	GO:1901575	organic substance catabolic process	BP	1	0.105906	1	4.16657		FALSE	FALSE	TRUE
SPBPB2B2.05	class I glutamine amidotransferase family protein	GO:0009056	catabolic process	BP	1	0.13442	1	4.05509		FALSE	FALSE	TRUE
SPBPB2B2.05	class I glutamine amidotransferase family protein	GO:1901565	organonitrogen compound catabolic process	BP	1	0.101833	1	5.06108		FALSE	FALSE	TRUE
SPAC6G9.05	coenzyme A diphosphatase (predicted)	GO:0009259	ribonucleotide metabolic process	BP	1	0.112016	1	5.83427		FALSE	TRUE	FALSE
SPAC6G9.05	coenzyme A diphosphatase (predicted)	GO:1901362	organic cyclic compound biosynthetic process	BP	1	0.435845	1	4.35078		FALSE	TRUE	FALSE
SPAC6G9.05	coenzyme A diphosphatase (predicted)	GO:0009150	purine ribonucleotide metabolic process	BP	1	0.124236	1	6.0368		FALSE	TRUE	FALSE
SPAC6G9.05	coenzyme A diphosphatase (predicted)	GO:0019637	organophosphate metabolic process	BP	1	0.356415	1	4.75247	automatic	FALSE	TRUE	FALSE
SPAC6G9.05	coenzyme A diphosphatase (predicted)	GO:0006796	phosphate-containing compound metabolic process	BP	1	0.358452	1	4.57439	automatic	FALSE	TRUE	FALSE
SPAC6G9.05	coenzyme A diphosphatase (predicted)	GO:1901565	organonitrogen compound catabolic process	BP	1	0.187373	1	5.06108		FALSE	TRUE	FALSE
SPAC6G9.05	coenzyme A diphosphatase (predicted)	GO:0018130	heterocycle biosynthetic process	BP	1	0.415479	1	4.44798		FALSE	TRUE	FALSE
SPAC6G9.05	coenzyme A diphosphatase (predicted)	GO:0072521	purine-containing compound metabolic process	BP	1	0.175153	1	5.68729		FALSE	TRUE	FALSE
SPAC6G9.05	coenzyme A diphosphatase (predicted)	GO:0006732	obsolete coenzyme metabolic process	BP	1	0.189409	1	10.6218		FALSE	TRUE	FALSE
SPAC6G9.05	coenzyme A diphosphatase (predicted)	GO:0055086	nucleobase-containing small molecule metabolic process	BP	1	0.305499	1	5.04582	automatic	FALSE	TRUE	FALSE
SPAC6G9.05	coenzyme A diphosphatase (predicted)	GO:0006793	phosphorus metabolic process	BP	1	0.350305	1	4.53955	automatic	FALSE	TRUE	FALSE
SPAC6G9.05	coenzyme A diphosphatase (predicted)	GO:0019439	aromatic compound catabolic process	BP	1	0.285132	1	5.1495		FALSE	TRUE	FALSE
SPAC6G9.05	coenzyme A diphosphatase (predicted)	GO:0044271	cellular nitrogen compound biosynthetic process	BP	1	0.329939	1	3.90396		FALSE	TRUE	FALSE
SPAC6G9.05	coenzyme A diphosphatase (predicted)	GO:0044248	cellular catabolic process	BP	1	0.215886	1	4.14326		FALSE	TRUE	FALSE
SPAC6G9.05	coenzyme A diphosphatase (predicted)	GO:1901361	organic cyclic compound catabolic process	BP	1	0.238289	1	5.1246		FALSE	TRUE	FALSE
SPAC6G9.05	coenzyme A diphosphatase (predicted)	GO:0051186	obsolete cofactor metabolic process	BP	1	0.213849	1	10.6218		FALSE	TRUE	FALSE
SPAC6G9.05	coenzyme A diphosphatase (predicted)	GO:0044270	cellular nitrogen compound catabolic process	BP	1	0.301426	1	5.13697		FALSE	TRUE	FALSE
SPAC6G9.05	coenzyme A diphosphatase (predicted)	GO:1901575	organic substance catabolic process	BP	1	0.370672	1	4.16657		FALSE	TRUE	FALSE
SPAC6G9.05	coenzyme A diphosphatase (predicted)	GO:0044281	small molecule metabolic process	BP	1	0.488798	1	3.83054	automatic	FALSE	TRUE	FALSE
SPAC6G9.05	coenzyme A diphosphatase (predicted)	GO:1901135	carbohydrate derivative metabolic process	BP	1	0.158859	1	4.98698		FALSE	TRUE	FALSE
SPAC6G9.05	coenzyme A diphosphatase (predicted)	GO:0044283	small molecule biosynthetic process	BP	1	0.268839	1	4.73844		FALSE	TRUE	FALSE
SPAC6G9.05	coenzyme A diphosphatase (predicted)	GO:0009056	catabolic process	BP	1	0.244399	1	4.05509		FALSE	TRUE	FALSE
SPAC6G9.05	coenzyme A diphosphatase (predicted)	GO:0034655	nucleobase-containing compound catabolic process	BP	1	0.217923	1	5.18804		FALSE	TRUE	FALSE
SPAC6G9.05	coenzyme A diphosphatase (predicted)	GO:0046700	heterocycle catabolic process	BP	1	0.266802	1	5.13283		FALSE	TRUE	FALSE
SPAC6G9.05	coenzyme A diphosphatase (predicted)	GO:0006753	nucleoside phosphate metabolic process	BP	1	0.258656	1	5.36427	automatic	FALSE	TRUE	FALSE
SPAC6G9.05	coenzyme A diphosphatase (predicted)	GO:0009117	nucleotide metabolic process	BP	1	0.201629	1	5.41228		FALSE	TRUE	FALSE
SPAC6G9.05	coenzyme A diphosphatase (predicted)	GO:0034654	nucleobase-containing compound biosynthetic process	BP	1	0.336049	1	4.71913		FALSE	TRUE	FALSE
SPAC6G9.05	coenzyme A diphosphatase (predicted)	GO:0019438	aromatic compound biosynthetic process	BP	1	0.301426	1	4.48404		FALSE	TRUE	FALSE
SPCC1183.07	U3 snoRNP-associated protein Rrp5 (predicted)	GO:0006364	rRNA processing	BP	1	0.105906	1	5.35391	curated	FALSE	TRUE	FALSE
SPCC1223.03c	glycerol-3-phosphate dehydrogenase Gut2 (predicted)	GO:0044281	small molecule metabolic process	BP	1	0.366599	1	3.83054	automatic	FALSE	TRUE	FALSE
SPCC1223.03c	glycerol-3-phosphate dehydrogenase Gut2 (predicted)	GO:0005975	carbohydrate metabolic process	BP	1	0.132383	1	5.57191	automatic	FALSE	TRUE	FALSE
SPCC4B3.06c	NADPH-dependent FMN reductase (predicted)	GO:0050794	regulation of cellular process	BP	1	0.144603	1	2.8982		FALSE	FALSE	TRUE
SPCC4B3.06c	NADPH-dependent FMN reductase (predicted)	GO:0031323	regulation of cellular metabolic process	BP	1	0.114053	1	3.69519		FALSE	FALSE	TRUE
SPBC1539.03c	argininosuccinate lyase (predicted)	GO:1901605	alpha-amino acid metabolic process	BP	1	0.600815	1	5.17073	automatic	FALSE	TRUE	FALSE
SPBC1539.03c	argininosuccinate lyase (predicted)	GO:0006520	cellular amino acid metabolic process	BP	1	0.672098	1	4.94844	automatic	FALSE	TRUE	FALSE
SPBC1539.03c	argininosuccinate lyase (predicted)	GO:0019752	carboxylic acid metabolic process	BP	1	0.733198	1	4.5103	automatic	FALSE	TRUE	FALSE
SPBC1539.03c	argininosuccinate lyase (predicted)	GO:0006082	organic acid metabolic process	BP	1	0.725051	1	4.49054	automatic	FALSE	TRUE	FALSE
SPBC1539.03c	argininosuccinate lyase (predicted)	GO:0043436	oxoacid metabolic process	BP	1	0.672098	1	4.4949	automatic	FALSE	TRUE	FALSE
SPBC13E7.11	mitochondrial rhomboid protease (predicted)	GO:0050794	regulation of cellular process	BP	1	0.112016	1	2.8982		FALSE	TRUE	FALSE
SPBC800.06	ribosome biogenesis protein Brx1 (predicted)	GO:0034622	cellular protein-containing complex assembly	BP	1	0.14053	1	5.05342		FALSE	TRUE	FALSE
SPBC800.06	ribosome biogenesis protein Brx1 (predicted)	GO:0071826	ribonucleoprotein complex subunit organization	BP	1	0.148676	1	5.92129		FALSE	TRUE	FALSE
SPBC800.06	ribosome biogenesis protein Brx1 (predicted)	GO:0016043	cellular component organization	BP	1	0.1222	1	3.17343		FALSE	TRUE	FALSE
SPBC800.06	ribosome biogenesis protein Brx1 (predicted)	GO:0022607	cellular component assembly	BP	1	0.10387	1	4.31549		FALSE	TRUE	FALSE
SPBC800.06	ribosome biogenesis protein Brx1 (predicted)	GO:0065003	protein-containing complex assembly	BP	1	0.138493	1	5.03827		FALSE	TRUE	FALSE
SPBC800.06	ribosome biogenesis protein Brx1 (predicted)	GO:0043933	protein-containing complex subunit organization	BP	1	0.130346	1	4.76383		FALSE	TRUE	FALSE
SPBC11B10.10c	histone H2A variant H2A.Z, Pht1	GO:0097549	chromatin organization involved in negative regulation of transcription	BP	1	0.10387	1	5.66594		FALSE	TRUE	FALSE
SPBC11B10.10c	histone H2A variant H2A.Z, Pht1	GO:0009892	negative regulation of metabolic process	BP	1	0.181263	1	4.36986		FALSE	TRUE	FALSE
SPBC11B10.10c	histone H2A variant H2A.Z, Pht1	GO:2000113	negative regulation of cellular macromolecule biosynthetic process	BP	1	0.148676	1	5.10834		FALSE	TRUE	FALSE
SPBC11B10.10c	histone H2A variant H2A.Z, Pht1	GO:0031324	negative regulation of cellular metabolic process	BP	1	0.189409	1	4.84721		FALSE	TRUE	FALSE
SPBC11B10.10c	histone H2A variant H2A.Z, Pht1	GO:0009890	negative regulation of biosynthetic process	BP	1	0.12831	1	5.04204		FALSE	TRUE	FALSE
SPBC11B10.10c	histone H2A variant H2A.Z, Pht1	GO:0051172	negative regulation of nitrogen compound metabolic process	BP	1	0.130346	1	5.01229		FALSE	TRUE	FALSE
SPBC11B10.10c	histone H2A variant H2A.Z, Pht1	GO:0010629	negative regulation of gene expression	BP	1	0.11609	1	4.67112		FALSE	TRUE	FALSE
SPBC11B10.10c	histone H2A variant H2A.Z, Pht1	GO:0051253	negative regulation of RNA metabolic process	BP	1	0.124236	1	5.38002		FALSE	TRUE	FALSE
SPBC11B10.10c	histone H2A variant H2A.Z, Pht1	GO:0045934	negative regulation of nucleobase-containing compound metabolic process	BP	1	0.126273	1	5.21459		FALSE	TRUE	FALSE
SPBC11B10.10c	histone H2A variant H2A.Z, Pht1	GO:1903507	negative regulation of nucleic acid-templated transcription	BP	1	0.112016	1	5.42327		FALSE	TRUE	FALSE
SPBC11B10.10c	histone H2A variant H2A.Z, Pht1	GO:0031327	negative regulation of cellular biosynthetic process	BP	1	0.126273	1	5.04204		FALSE	TRUE	FALSE
SPBC11B10.10c	histone H2A variant H2A.Z, Pht1	GO:0045892	negative regulation of transcription, DNA-templated	BP	1	0.11609	1	5.42327		FALSE	TRUE	FALSE
SPBC11B10.10c	histone H2A variant H2A.Z, Pht1	GO:0010558	negative regulation of macromolecule biosynthetic process	BP	1	0.156823	1	5.10834		FALSE	TRUE	FALSE
SPBC11B10.10c	histone H2A variant H2A.Z, Pht1	GO:0010605	negative regulation of macromolecule metabolic process	BP	1	0.193483	1	4.41117		FALSE	TRUE	FALSE
SPBC11B10.10c	histone H2A variant H2A.Z, Pht1	GO:0090304	nucleic acid metabolic process	BP	1	0.215886	1	3.20299		FALSE	TRUE	FALSE
SPAC30.02c	elongator complex associated protein Kti12 (predicted)	GO:0051171	regulation of nitrogen compound metabolic process	BP	1	0.105906	1	3.77908		FALSE	TRUE	FALSE
SPAC30.02c	elongator complex associated protein Kti12 (predicted)	GO:0010468	regulation of gene expression	BP	1	0.130346	1	3.8283		FALSE	TRUE	FALSE
SPAC30.02c	elongator complex associated protein Kti12 (predicted)	GO:0019222	regulation of metabolic process	BP	1	0.112016	1	3.51189		FALSE	TRUE	FALSE
SPAC30.02c	elongator complex associated protein Kti12 (predicted)	GO:0050794	regulation of cellular process	BP	1	0.13442	1	2.8982		FALSE	TRUE	FALSE
SPAC30.02c	elongator complex associated protein Kti12 (predicted)	GO:0060255	regulation of macromolecule metabolic process	BP	1	0.120163	1	3.55445		FALSE	TRUE	FALSE
SPAC30.02c	elongator complex associated protein Kti12 (predicted)	GO:2000112	regulation of cellular macromolecule biosynthetic process	BP	1	0.124236	1	3.96376		FALSE	TRUE	FALSE
SPAC30.02c	elongator complex associated protein Kti12 (predicted)	GO:0080090	regulation of primary metabolic process	BP	1	0.10387	1	3.74241		FALSE	TRUE	FALSE
SPAC30.02c	elongator complex associated protein Kti12 (predicted)	GO:0031323	regulation of cellular metabolic process	BP	1	0.13442	1	3.69519		FALSE	TRUE	FALSE
SPAC30.02c	elongator complex associated protein Kti12 (predicted)	GO:0009889	regulation of biosynthetic process	BP	1	0.136456	1	3.91981		FALSE	TRUE	FALSE
SPAC30.02c	elongator complex associated protein Kti12 (predicted)	GO:0031326	regulation of cellular biosynthetic process	BP	1	0.107943	1	3.91981		FALSE	TRUE	FALSE
SPAC222.06	nuclear HMG-like acidic protein Mak16 (predicted)	GO:0006396	RNA processing	BP	1	0.411405	1	4.40317		FALSE	TRUE	FALSE
SPAC222.06	nuclear HMG-like acidic protein Mak16 (predicted)	GO:0006364	rRNA processing	BP	1	0.126273	1	5.35391		FALSE	TRUE	FALSE
SPAC222.06	nuclear HMG-like acidic protein Mak16 (predicted)	GO:0034470	ncRNA processing	BP	1	0.466395	1	4.85971		FALSE	TRUE	FALSE
SPAC222.06	nuclear HMG-like acidic protein Mak16 (predicted)	GO:0016070	RNA metabolic process	BP	1	0.448065	1	3.70307		FALSE	TRUE	FALSE
SPAC222.06	nuclear HMG-like acidic protein Mak16 (predicted)	GO:0016072	rRNA metabolic process	BP	1	0.505092	1	5.21012		FALSE	TRUE	FALSE
SPAC222.06	nuclear HMG-like acidic protein Mak16 (predicted)	GO:0034660	ncRNA metabolic process	BP	1	0.529532	1	4.55334		FALSE	TRUE	FALSE
SPAC222.06	nuclear HMG-like acidic protein Mak16 (predicted)	GO:0090304	nucleic acid metabolic process	BP	1	0.486762	1	3.20299		FALSE	TRUE	FALSE
SPAC19D5.04	HECT-type ubiquitin-protein ligase E3 Ptr1	GO:0006810	transport	BP	1	0.270876	1	3.50456		FALSE	TRUE	FALSE
SPAC19D5.04	HECT-type ubiquitin-protein ligase E3 Ptr1	GO:0051234	establishment of localization	BP	1	0.217923	1	3.47657		FALSE	TRUE	FALSE
SPAC19D5.04	HECT-type ubiquitin-protein ligase E3 Ptr1	GO:0051179	localization	BP	1	0.344196	1	3.1988		FALSE	TRUE	FALSE
SPCC622.09	histone H2B Htb1	GO:0009892	negative regulation of metabolic process	BP	1	0.12831	1	4.36986		FALSE	TRUE	FALSE
SPCC622.09	histone H2B Htb1	GO:0006355	regulation of transcription, DNA-templated	BP	1	0.238289	1	4.19205		FALSE	TRUE	FALSE
SPCC622.09	histone H2B Htb1	GO:1903506	regulation of nucleic acid-templated transcription	BP	1	0.285132	1	4.18242		FALSE	TRUE	FALSE
SPCC622.09	histone H2B Htb1	GO:1902679	negative regulation of RNA biosynthetic process	BP	1	0.101833	1	5.42327		FALSE	TRUE	FALSE
SPCC622.09	histone H2B Htb1	GO:2000113	negative regulation of cellular macromolecule biosynthetic process	BP	1	0.177189	1	5.10834		FALSE	TRUE	FALSE
SPCC622.09	histone H2B Htb1	GO:0048519	negative regulation of biological process	BP	1	0.203666	1	3.83054		FALSE	TRUE	FALSE
SPCC622.09	histone H2B Htb1	GO:0031324	negative regulation of cellular metabolic process	BP	1	0.112016	1	4.84721		FALSE	TRUE	FALSE
SPCC622.09	histone H2B Htb1	GO:0009890	negative regulation of biosynthetic process	BP	1	0.169043	1	5.04204		FALSE	TRUE	FALSE
SPCC622.09	histone H2B Htb1	GO:0006357	regulation of transcription by RNA polymerase II	BP	1	0.154786	1	4.46479		FALSE	TRUE	FALSE
SPCC622.09	histone H2B Htb1	GO:0060255	regulation of macromolecule metabolic process	BP	1	0.386965	1	3.55445		FALSE	TRUE	FALSE
SPCC622.09	histone H2B Htb1	GO:0010629	negative regulation of gene expression	BP	1	0.107943	1	4.67112		FALSE	TRUE	FALSE
SPCC622.09	histone H2B Htb1	GO:0031323	regulation of cellular metabolic process	BP	1	0.325866	1	3.69519		FALSE	TRUE	FALSE
SPCC622.09	histone H2B Htb1	GO:0010468	regulation of gene expression	BP	1	0.315682	1	3.8283		FALSE	TRUE	FALSE
SPCC622.09	histone H2B Htb1	GO:0048523	negative regulation of cellular process	BP	1	0.217923	1	4.08943		FALSE	TRUE	FALSE
SPCC622.09	histone H2B Htb1	GO:0051252	regulation of RNA metabolic process	BP	1	0.264766	1	4.14479		FALSE	TRUE	FALSE
SPCC622.09	histone H2B Htb1	GO:0051171	regulation of nitrogen compound metabolic process	BP	1	0.382892	1	3.77908		FALSE	TRUE	FALSE
SPCC622.09	histone H2B Htb1	GO:0045934	negative regulation of nucleobase-containing compound metabolic process	BP	1	0.118126	1	5.21459		FALSE	TRUE	FALSE
SPCC622.09	histone H2B Htb1	GO:2001141	regulation of RNA biosynthetic process	BP	1	0.289206	1	4.18082		FALSE	TRUE	FALSE
SPCC622.09	histone H2B Htb1	GO:0019222	regulation of metabolic process	BP	1	0.391039	1	3.51189		FALSE	TRUE	FALSE
SPCC622.09	histone H2B Htb1	GO:0050794	regulation of cellular process	BP	1	0.472505	1	2.8982		FALSE	TRUE	FALSE
SPCC622.09	histone H2B Htb1	GO:0031327	negative regulation of cellular biosynthetic process	BP	1	0.138493	1	5.04204		FALSE	TRUE	FALSE
SPCC622.09	histone H2B Htb1	GO:2000112	regulation of cellular macromolecule biosynthetic process	BP	1	0.305499	1	3.96376		FALSE	TRUE	FALSE
SPCC622.09	histone H2B Htb1	GO:0080090	regulation of primary metabolic process	BP	1	0.411405	1	3.74241		FALSE	TRUE	FALSE
SPCC622.09	histone H2B Htb1	GO:0010556	regulation of macromolecule biosynthetic process	BP	1	0.350305	1	3.95481		FALSE	TRUE	FALSE
SPCC622.09	histone H2B Htb1	GO:0009889	regulation of biosynthetic process	BP	1	0.336049	1	3.91981		FALSE	TRUE	FALSE
SPCC622.09	histone H2B Htb1	GO:0019219	regulation of nucleobase-containing compound metabolic process	BP	1	0.299389	1	3.97408		FALSE	TRUE	FALSE
SPCC622.09	histone H2B Htb1	GO:0010558	negative regulation of macromolecule biosynthetic process	BP	1	0.158859	1	5.10834		FALSE	TRUE	FALSE
SPCC622.09	histone H2B Htb1	GO:0010605	negative regulation of macromolecule metabolic process	BP	1	0.101833	1	4.41117		FALSE	TRUE	FALSE
SPCC622.09	histone H2B Htb1	GO:0031326	regulation of cellular biosynthetic process	BP	1	0.281059	1	3.91981		FALSE	TRUE	FALSE
SPCC622.09	histone H2B Htb1	GO:0006950	response to stress	BP	1	0.14053	1	4.13256		FALSE	TRUE	FALSE
SPCC622.09	histone H2B Htb1	GO:0050896	response to stimulus	BP	1	0.197556	1	4.04113		FALSE	TRUE	FALSE
SPCC622.09	histone H2B Htb1	GO:0033554	cellular response to stress	BP	1	0.169043	1	4.13866		FALSE	TRUE	FALSE
SPCC622.09	histone H2B Htb1	GO:0006259	DNA metabolic process	BP	1	0.14664	1	4.14019		FALSE	TRUE	FALSE
SPCC622.09	histone H2B Htb1	GO:0090304	nucleic acid metabolic process	BP	1	0.201629	1	3.20299		FALSE	TRUE	FALSE
SPCC622.09	histone H2B Htb1	GO:0051716	cellular response to stimulus	BP	1	0.173116	1	4.04948		FALSE	TRUE	FALSE
SPCC622.09	histone H2B Htb1	GO:0006325	chromatin organization	BP	1	0.285132	1	4.34889	curated	FALSE	TRUE	FALSE
SPBC947.05c	ferric-chelate reductase Frp2 (predicted)	GO:0033554	cellular response to stress	BP	1	0.10387	1	4.13866		FALSE	TRUE	FALSE
SPBC947.05c	ferric-chelate reductase Frp2 (predicted)	GO:0051716	cellular response to stimulus	BP	1	0.101833	1	4.04948		FALSE	TRUE	FALSE
SPBC1105.12	histone H4 h4.3	GO:0031323	regulation of cellular metabolic process	BP	1	0.148676	1	3.69519		FALSE	TRUE	FALSE
SPBC1105.12	histone H4 h4.3	GO:0080090	regulation of primary metabolic process	BP	1	0.10998	1	3.74241		FALSE	TRUE	FALSE
SPBC1105.12	histone H4 h4.3	GO:0019219	regulation of nucleobase-containing compound metabolic process	BP	1	0.13442	1	3.97408		FALSE	TRUE	FALSE
SPBC1105.12	histone H4 h4.3	GO:0006325	chromatin organization	BP	1	0.167006	1	4.34889		FALSE	TRUE	FALSE
SPBC1105.12	histone H4 h4.3	GO:0006355	regulation of transcription, DNA-templated	BP	1	0.105906	1	4.19205		FALSE	TRUE	FALSE
SPBC1105.12	histone H4 h4.3	GO:0016043	cellular component organization	BP	1	0.226069	1	3.17343		FALSE	TRUE	FALSE
SPBC1105.12	histone H4 h4.3	GO:0019222	regulation of metabolic process	BP	1	0.1222	1	3.51189		FALSE	TRUE	FALSE
SPBC1105.12	histone H4 h4.3	GO:0050794	regulation of cellular process	BP	1	0.297352	1	2.8982		FALSE	TRUE	FALSE
SPBC1105.12	histone H4 h4.3	GO:0010556	regulation of macromolecule biosynthetic process	BP	1	0.112016	1	3.95481		FALSE	TRUE	FALSE
SPBC1105.12	histone H4 h4.3	GO:0031326	regulation of cellular biosynthetic process	BP	1	0.112016	1	3.91981		FALSE	TRUE	FALSE
SPBC1105.12	histone H4 h4.3	GO:0022402	cell cycle process	BP	1	0.177189	1	3.7611		FALSE	TRUE	FALSE
SPBC1198.14c	fructose-1,6-bisphosphatase Fbp1	GO:0016043	cellular component organization	BP	1	0.112016	1	3.17343		FALSE	TRUE	FALSE
SPCC1795.01c	mitotic spindle checkpoint protein Mad3	GO:2001252	positive regulation of chromosome organization	BP	1	0.293279	1	6.08917		FALSE	TRUE	FALSE
SPCC1795.01c	mitotic spindle checkpoint protein Mad3	GO:0060255	regulation of macromolecule metabolic process	BP	1	0.112016	1	3.55445		FALSE	TRUE	FALSE
SPCC1795.01c	mitotic spindle checkpoint protein Mad3	GO:0048518	positive regulation of biological process	BP	1	0.287169	1	3.96761		FALSE	TRUE	FALSE
SPCC1795.01c	mitotic spindle checkpoint protein Mad3	GO:0048522	positive regulation of cellular process	BP	1	0.303462	1	3.98189		FALSE	TRUE	FALSE
SPCC1795.01c	mitotic spindle checkpoint protein Mad3	GO:0010638	positive regulation of organelle organization	BP	1	0.264766	1	5.54659		FALSE	TRUE	FALSE
SPCC1795.01c	mitotic spindle checkpoint protein Mad3	GO:0051130	positive regulation of cellular component organization	BP	1	0.244399	1	5.36427		FALSE	TRUE	FALSE
SPCC1795.01c	mitotic spindle checkpoint protein Mad3	GO:0009889	regulation of biosynthetic process	BP	1	0.107943	1	3.91981		FALSE	TRUE	FALSE
SPCC1795.01c	mitotic spindle checkpoint protein Mad3	GO:1903046	meiotic cell cycle process	BP	1	0.458248	1	4.93819		FALSE	TRUE	FALSE
SPCC1795.01c	mitotic spindle checkpoint protein Mad3	GO:0006996	organelle organization	BP	1	0.492872	1	4.03836	experimental	FALSE	TRUE	FALSE
SPCC1795.01c	mitotic spindle checkpoint protein Mad3	GO:0051276	chromosome organization	BP	1	0.429735	1	4.85033	experimental	FALSE	TRUE	FALSE
SPCC1795.01c	mitotic spindle checkpoint protein Mad3	GO:0016043	cellular component organization	BP	1	0.482688	1	3.17343	experimental	FALSE	TRUE	FALSE
SPCC1795.01c	mitotic spindle checkpoint protein Mad3	GO:0022414	reproductive process	BP	1	0.407332	1	4.58151		FALSE	TRUE	FALSE
SPAPYUK71.03c	tricalbin, C2 domain protein (phospholipid binding) ER-plasma membrane tethering protein Tcb3	GO:0019222	regulation of metabolic process	BP	1	0.118126	1	3.51189		FALSE	TRUE	FALSE
SPAPYUK71.03c	tricalbin, C2 domain protein (phospholipid binding) ER-plasma membrane tethering protein Tcb3	GO:0050794	regulation of cellular process	BP	1	0.329939	1	2.8982		FALSE	TRUE	FALSE
SPAPYUK71.03c	tricalbin, C2 domain protein (phospholipid binding) ER-plasma membrane tethering protein Tcb3	GO:0060255	regulation of macromolecule metabolic process	BP	1	0.101833	1	3.55445		FALSE	TRUE	FALSE
SPAPYUK71.03c	tricalbin, C2 domain protein (phospholipid binding) ER-plasma membrane tethering protein Tcb3	GO:0031323	regulation of cellular metabolic process	BP	1	0.130346	1	3.69519		FALSE	TRUE	FALSE
SPAPYUK71.03c	tricalbin, C2 domain protein (phospholipid binding) ER-plasma membrane tethering protein Tcb3	GO:0016043	cellular component organization	BP	1	0.203666	1	3.17343	curated	FALSE	TRUE	FALSE
SPAC110.04c	heat shock protein Pss1	GO:0050896	response to stimulus	BP	1	0.132383	1	4.04113		FALSE	TRUE	FALSE
SPAC110.04c	heat shock protein Pss1	GO:0006950	response to stress	BP	1	0.105906	1	4.13256		FALSE	TRUE	FALSE
SPAC6G9.11	SNAP receptor, synaptobrevin family	GO:0016192	vesicle-mediated transport	BP	1	0.543788	1	4.73012	experimental	FALSE	TRUE	FALSE
SPAC1142.02c	TPR repeat protein, SGT2 family (predicted)	GO:0033365	protein localization to organelle	BP	1	0.154786	1	4.96928		FALSE	TRUE	FALSE
SPAC1142.02c	TPR repeat protein, SGT2 family (predicted)	GO:0051641	cellular localization	BP	1	0.150713	1	3.67383		FALSE	TRUE	FALSE
SPAC1142.02c	TPR repeat protein, SGT2 family (predicted)	GO:0046907	intracellular transport	BP	1	0.156823	1	4.17446		FALSE	TRUE	FALSE
SPAC1142.02c	TPR repeat protein, SGT2 family (predicted)	GO:0042886	amide transport	BP	1	0.183299	1	4.6328		FALSE	TRUE	FALSE
SPAC1142.02c	TPR repeat protein, SGT2 family (predicted)	GO:0033036	macromolecule localization	BP	1	0.187373	1	4.13408		FALSE	TRUE	FALSE
SPAC1142.02c	TPR repeat protein, SGT2 family (predicted)	GO:0006605	protein targeting	BP	1	0.120163	1	6.57872		FALSE	TRUE	FALSE
SPAC1142.02c	TPR repeat protein, SGT2 family (predicted)	GO:0071702	organic substance transport	BP	1	0.156823	1	4.15874		FALSE	TRUE	FALSE
SPAC1142.02c	TPR repeat protein, SGT2 family (predicted)	GO:0045184	establishment of protein localization	BP	1	0.152749	1	4.68952		FALSE	TRUE	FALSE
SPAC1142.02c	TPR repeat protein, SGT2 family (predicted)	GO:0015031	protein transport	BP	1	0.171079	1	4.73012		FALSE	TRUE	FALSE
SPAC1142.02c	TPR repeat protein, SGT2 family (predicted)	GO:0070727	cellular macromolecule localization	BP	1	0.167006	1	4.47116		FALSE	TRUE	FALSE
SPAC1142.02c	TPR repeat protein, SGT2 family (predicted)	GO:0071705	nitrogen compound transport	BP	1	0.14053	1	4.27088		FALSE	TRUE	FALSE
SPAC1142.02c	TPR repeat protein, SGT2 family (predicted)	GO:0034613	cellular protein localization	BP	1	0.148676	1	4.47758		FALSE	TRUE	FALSE
SPAC1142.02c	TPR repeat protein, SGT2 family (predicted)	GO:0006886	intracellular protein transport	BP	1	0.144603	1	4.76669		FALSE	TRUE	FALSE
SPAC1142.02c	TPR repeat protein, SGT2 family (predicted)	GO:0008104	protein localization	BP	1	0.193483	1	4.14326		FALSE	TRUE	FALSE
SPBC27B12.12c	CorA family magnesium ion transmembrane transporter (predicted)	GO:0098660	inorganic ion transmembrane transport	BP	1	0.101833	1	5.79345	curated	FALSE	FALSE	FALSE
SPBC27B12.12c	CorA family magnesium ion transmembrane transporter (predicted)	GO:0034220	ion transmembrane transport	BP	1	0.158859	1	4.98698	curated	FALSE	FALSE	FALSE
SPBC27B12.12c	CorA family magnesium ion transmembrane transporter (predicted)	GO:0055085	transmembrane transport	BP	1	0.150713	1	4.56264	curated	FALSE	FALSE	FALSE
SPBC27B12.12c	CorA family magnesium ion transmembrane transporter (predicted)	GO:0098655	cation transmembrane transport	BP	1	0.118126	1	5.46271	curated	FALSE	FALSE	FALSE
SPCC4B3.04c	lysophospholipase (predicted)	GO:0019222	regulation of metabolic process	BP	1	0.132383	1	3.51189		FALSE	TRUE	FALSE
SPCC4B3.04c	lysophospholipase (predicted)	GO:0050794	regulation of cellular process	BP	1	0.197556	1	2.8982		FALSE	TRUE	FALSE
SPAC144.12	ribose 5-phosphate isomerase Rki1 (predicted)	GO:1901362	organic cyclic compound biosynthetic process	BP	1	0.205703	1	4.35078		FALSE	TRUE	FALSE
SPAC144.12	ribose 5-phosphate isomerase Rki1 (predicted)	GO:0044281	small molecule metabolic process	BP	1	0.441955	1	3.83054		FALSE	TRUE	FALSE
SPAC144.12	ribose 5-phosphate isomerase Rki1 (predicted)	GO:0044283	small molecule biosynthetic process	BP	1	0.183299	1	4.73844		FALSE	TRUE	FALSE
SPAC144.12	ribose 5-phosphate isomerase Rki1 (predicted)	GO:0017144	drug metabolic process	BP	1	0.14664	1	10.6218		FALSE	TRUE	FALSE
SPAC144.12	ribose 5-phosphate isomerase Rki1 (predicted)	GO:0018130	heterocycle biosynthetic process	BP	1	0.185336	1	4.44798		FALSE	TRUE	FALSE
SPAC144.12	ribose 5-phosphate isomerase Rki1 (predicted)	GO:1901566	organonitrogen compound biosynthetic process	BP	1	0.246436	1	3.94847		FALSE	TRUE	FALSE
SPAC144.12	ribose 5-phosphate isomerase Rki1 (predicted)	GO:0044271	cellular nitrogen compound biosynthetic process	BP	1	0.228106	1	3.90396		FALSE	TRUE	FALSE
SPAC144.12	ribose 5-phosphate isomerase Rki1 (predicted)	GO:0019438	aromatic compound biosynthetic process	BP	1	0.183299	1	4.48404		FALSE	TRUE	FALSE
SPAC144.12	ribose 5-phosphate isomerase Rki1 (predicted)	GO:0006793	phosphorus metabolic process	BP	1	0.142566	1	4.53955	curated	FALSE	TRUE	FALSE
SPAC144.12	ribose 5-phosphate isomerase Rki1 (predicted)	GO:0019637	organophosphate metabolic process	BP	1	0.185336	1	4.75247	curated	FALSE	TRUE	FALSE
SPAC144.12	ribose 5-phosphate isomerase Rki1 (predicted)	GO:0006796	phosphate-containing compound metabolic process	BP	1	0.173116	1	4.57439	curated	FALSE	TRUE	FALSE
SPAC13C5.05c	N-acetylglucosamine-phosphate mutase (predicted)	GO:1901137	carbohydrate derivative biosynthetic process	BP	1	0.311609	1	5.45698	automatic	FALSE	TRUE	FALSE
SPAC13C5.05c	N-acetylglucosamine-phosphate mutase (predicted)	GO:1901135	carbohydrate derivative metabolic process	BP	1	0.425662	1	4.98698	automatic	FALSE	TRUE	FALSE
SPBC216.04c	peptide-methionine (R)-S-oxide reductase MsrB	GO:0050896	response to stimulus	BP	1	0.124236	1	4.04113	curated	FALSE	TRUE	FALSE
SPBC216.04c	peptide-methionine (R)-S-oxide reductase MsrB	GO:0006950	response to stress	BP	1	0.101833	1	4.13256		FALSE	TRUE	FALSE
SPCC794.01c	glucose dehydrogenase Gcd1	GO:0044281	small molecule metabolic process	BP	1	0.362525	1	3.83054	automatic	FALSE	TRUE	FALSE
SPCC794.01c	glucose dehydrogenase Gcd1	GO:0005975	carbohydrate metabolic process	BP	1	0.254582	1	5.57191	automatic	FALSE	TRUE	FALSE
SPCC794.01c	glucose dehydrogenase Gcd1	GO:0006091	generation of precursor metabolites and energy	BP	1	0.364562	1	5.97738	automatic	FALSE	TRUE	FALSE
SPCC794.01c	glucose dehydrogenase Gcd1	GO:0006793	phosphorus metabolic process	BP	1	0.327902	1	4.53955	automatic	FALSE	TRUE	FALSE
SPCC794.01c	glucose dehydrogenase Gcd1	GO:0019637	organophosphate metabolic process	BP	1	0.378819	1	4.75247	automatic	FALSE	TRUE	FALSE
SPCC794.01c	glucose dehydrogenase Gcd1	GO:0006796	phosphate-containing compound metabolic process	BP	1	0.309572	1	4.57439	automatic	FALSE	TRUE	FALSE
SPCC794.01c	glucose dehydrogenase Gcd1	GO:1901135	carbohydrate derivative metabolic process	BP	1	0.419552	1	4.98698	automatic	FALSE	TRUE	FALSE
SPCC794.01c	glucose dehydrogenase Gcd1	GO:0055114	oxidation-reduction process	BP	1	0.264766	1	6.21505	automatic	FALSE	TRUE	FALSE
SPAC8C9.05	D-Tyr-tRNA deacylase Dtd1 (predicted)	GO:0006399	tRNA metabolic process	BP	1	0.105906	1	5.55286	curated	FALSE	TRUE	FALSE
SPAC1006.06	RhoGEF Rgf2	GO:0050794	regulation of cellular process	BP	1	0.533605	1	2.8982	automatic	FALSE	TRUE	FALSE
SPCC5E4.03c	SAGA complex subunit/TATA-binding protein associated factor/transcription factor TFIID complex subunit Taf5	GO:0009893	positive regulation of metabolic process	BP	1	0.1222	1	4.74684		FALSE	TRUE	FALSE
SPCC5E4.03c	SAGA complex subunit/TATA-binding protein associated factor/transcription factor TFIID complex subunit Taf5	GO:0006355	regulation of transcription, DNA-templated	BP	1	0.244399	1	4.19205		FALSE	TRUE	FALSE
SPCC5E4.03c	SAGA complex subunit/TATA-binding protein associated factor/transcription factor TFIID complex subunit Taf5	GO:1903506	regulation of nucleic acid-templated transcription	BP	1	0.279022	1	4.18242		FALSE	TRUE	FALSE
SPCC5E4.03c	SAGA complex subunit/TATA-binding protein associated factor/transcription factor TFIID complex subunit Taf5	GO:0010604	positive regulation of macromolecule metabolic process	BP	1	0.13442	1	4.78988		FALSE	TRUE	FALSE
SPCC5E4.03c	SAGA complex subunit/TATA-binding protein associated factor/transcription factor TFIID complex subunit Taf5	GO:0006357	regulation of transcription by RNA polymerase II	BP	1	0.185336	1	4.46479		FALSE	TRUE	FALSE
SPCC5E4.03c	SAGA complex subunit/TATA-binding protein associated factor/transcription factor TFIID complex subunit Taf5	GO:0060255	regulation of macromolecule metabolic process	BP	1	0.307536	1	3.55445		FALSE	TRUE	FALSE
SPCC5E4.03c	SAGA complex subunit/TATA-binding protein associated factor/transcription factor TFIID complex subunit Taf5	GO:0048518	positive regulation of biological process	BP	1	0.179226	1	3.96761		FALSE	TRUE	FALSE
SPCC5E4.03c	SAGA complex subunit/TATA-binding protein associated factor/transcription factor TFIID complex subunit Taf5	GO:0031323	regulation of cellular metabolic process	BP	1	0.368635	1	3.69519		FALSE	TRUE	FALSE
SPCC5E4.03c	SAGA complex subunit/TATA-binding protein associated factor/transcription factor TFIID complex subunit Taf5	GO:0010468	regulation of gene expression	BP	1	0.317719	1	3.8283		FALSE	TRUE	FALSE
SPCC5E4.03c	SAGA complex subunit/TATA-binding protein associated factor/transcription factor TFIID complex subunit Taf5	GO:0051252	regulation of RNA metabolic process	BP	1	0.287169	1	4.14479		FALSE	TRUE	FALSE
SPCC5E4.03c	SAGA complex subunit/TATA-binding protein associated factor/transcription factor TFIID complex subunit Taf5	GO:0048522	positive regulation of cellular process	BP	1	0.185336	1	3.98189		FALSE	TRUE	FALSE
SPCC5E4.03c	SAGA complex subunit/TATA-binding protein associated factor/transcription factor TFIID complex subunit Taf5	GO:0051171	regulation of nitrogen compound metabolic process	BP	1	0.362525	1	3.77908		FALSE	TRUE	FALSE
SPCC5E4.03c	SAGA complex subunit/TATA-binding protein associated factor/transcription factor TFIID complex subunit Taf5	GO:0051173	positive regulation of nitrogen compound metabolic process	BP	1	0.14664	1	4.80764		FALSE	TRUE	FALSE
SPCC5E4.03c	SAGA complex subunit/TATA-binding protein associated factor/transcription factor TFIID complex subunit Taf5	GO:2001141	regulation of RNA biosynthetic process	BP	1	0.236253	1	4.18082		FALSE	TRUE	FALSE
SPCC5E4.03c	SAGA complex subunit/TATA-binding protein associated factor/transcription factor TFIID complex subunit Taf5	GO:0019222	regulation of metabolic process	BP	1	0.356415	1	3.51189		FALSE	TRUE	FALSE
SPCC5E4.03c	SAGA complex subunit/TATA-binding protein associated factor/transcription factor TFIID complex subunit Taf5	GO:0050794	regulation of cellular process	BP	1	0.450102	1	2.8982		FALSE	TRUE	FALSE
SPCC5E4.03c	SAGA complex subunit/TATA-binding protein associated factor/transcription factor TFIID complex subunit Taf5	GO:2000112	regulation of cellular macromolecule biosynthetic process	BP	1	0.323829	1	3.96376		FALSE	TRUE	FALSE
SPCC5E4.03c	SAGA complex subunit/TATA-binding protein associated factor/transcription factor TFIID complex subunit Taf5	GO:0080090	regulation of primary metabolic process	BP	1	0.364562	1	3.74241		FALSE	TRUE	FALSE
SPCC5E4.03c	SAGA complex subunit/TATA-binding protein associated factor/transcription factor TFIID complex subunit Taf5	GO:0010556	regulation of macromolecule biosynthetic process	BP	1	0.376782	1	3.95481		FALSE	TRUE	FALSE
SPCC5E4.03c	SAGA complex subunit/TATA-binding protein associated factor/transcription factor TFIID complex subunit Taf5	GO:0031325	positive regulation of cellular metabolic process	BP	1	0.13442	1	4.77244		FALSE	TRUE	FALSE
SPCC5E4.03c	SAGA complex subunit/TATA-binding protein associated factor/transcription factor TFIID complex subunit Taf5	GO:0009889	regulation of biosynthetic process	BP	1	0.340122	1	3.91981		FALSE	TRUE	FALSE
SPCC5E4.03c	SAGA complex subunit/TATA-binding protein associated factor/transcription factor TFIID complex subunit Taf5	GO:0019219	regulation of nucleobase-containing compound metabolic process	BP	1	0.319756	1	3.97408		FALSE	TRUE	FALSE
SPCC5E4.03c	SAGA complex subunit/TATA-binding protein associated factor/transcription factor TFIID complex subunit Taf5	GO:0031326	regulation of cellular biosynthetic process	BP	1	0.358452	1	3.91981		FALSE	TRUE	FALSE
SPAC2F7.05c	translation initiation factor eIF5, Tif5(predicted)	GO:0048519	negative regulation of biological process	BP	1	0.1222	1	3.83054		FALSE	TRUE	FALSE
SPAC2F7.05c	translation initiation factor eIF5, Tif5(predicted)	GO:0060255	regulation of macromolecule metabolic process	BP	1	0.105906	1	3.55445		FALSE	TRUE	FALSE
SPAC2F7.05c	translation initiation factor eIF5, Tif5(predicted)	GO:0010468	regulation of gene expression	BP	1	0.112016	1	3.8283		FALSE	TRUE	FALSE
SPAC2F7.05c	translation initiation factor eIF5, Tif5(predicted)	GO:0019222	regulation of metabolic process	BP	1	0.120163	1	3.51189		FALSE	TRUE	FALSE
SPAC2F7.05c	translation initiation factor eIF5, Tif5(predicted)	GO:0050794	regulation of cellular process	BP	1	0.10998	1	2.8982		FALSE	TRUE	FALSE
SPAC2F7.05c	translation initiation factor eIF5, Tif5(predicted)	GO:0010605	negative regulation of macromolecule metabolic process	BP	1	0.10998	1	4.41117		FALSE	TRUE	FALSE
SPAC2F7.05c	translation initiation factor eIF5, Tif5(predicted)	GO:0034622	cellular protein-containing complex assembly	BP	1	0.107943	1	5.05342		FALSE	TRUE	FALSE
SPAC2F7.05c	translation initiation factor eIF5, Tif5(predicted)	GO:0071826	ribonucleoprotein complex subunit organization	BP	1	0.11609	1	5.92129		FALSE	TRUE	FALSE
SPAC2F7.05c	translation initiation factor eIF5, Tif5(predicted)	GO:0065003	protein-containing complex assembly	BP	1	0.105906	1	5.03827		FALSE	TRUE	FALSE
SPAC2F7.05c	translation initiation factor eIF5, Tif5(predicted)	GO:0043933	protein-containing complex subunit organization	BP	1	0.156823	1	4.76383		FALSE	TRUE	FALSE
SPBC651.03c	GTPase activating protein Gyp10	GO:0016192	vesicle-mediated transport	BP	1	0.240326	1	4.73012	experimental	FALSE	TRUE	FALSE
SPAC323.05c	eRF1 methyltransferase Mtq2 (predicted)	GO:0043412	macromolecule modification	BP	1	0.156823	1	4.03422		FALSE	TRUE	FALSE
SPAC323.05c	eRF1 methyltransferase Mtq2 (predicted)	GO:0044267	cellular protein metabolic process	BP	1	0.156823	1	3.76847	curated	FALSE	TRUE	FALSE
SPAC323.05c	eRF1 methyltransferase Mtq2 (predicted)	GO:0019538	protein metabolic process	BP	1	0.276986	1	3.49327	curated	FALSE	TRUE	FALSE
SPBC25B2.05	rRNA processing protein Mis3	GO:0006364	rRNA processing	BP	1	0.423625	1	5.35391	experimental	FALSE	TRUE	FALSE
SPAC1250.03	ubiquitin conjugating enzyme E2 for HECT-type and RBR family E3 Ub ligases, Ubc14 (predicted)	GO:0043161	proteasome-mediated ubiquitin-dependent protein catabolic process	BP	1	0.366599	1	5.4978		FALSE	TRUE	FALSE
SPAC1250.03	ubiquitin conjugating enzyme E2 for HECT-type and RBR family E3 Ub ligases, Ubc14 (predicted)	GO:0030163	protein catabolic process	BP	1	0.409369	1	5.38002	curated	FALSE	TRUE	FALSE
SPAC1250.03	ubiquitin conjugating enzyme E2 for HECT-type and RBR family E3 Ub ligases, Ubc14 (predicted)	GO:0010498	proteasomal protein catabolic process	BP	1	0.511202	1	5.46271		FALSE	TRUE	FALSE
SPAC1250.03	ubiquitin conjugating enzyme E2 for HECT-type and RBR family E3 Ub ligases, Ubc14 (predicted)	GO:1901565	organonitrogen compound catabolic process	BP	1	0.435845	1	5.06108	curated	FALSE	TRUE	FALSE
SPAC1250.03	ubiquitin conjugating enzyme E2 for HECT-type and RBR family E3 Ub ligases, Ubc14 (predicted)	GO:0006511	ubiquitin-dependent protein catabolic process	BP	1	0.419552	1	5.25113	curated	FALSE	TRUE	FALSE
SPAC1250.03	ubiquitin conjugating enzyme E2 for HECT-type and RBR family E3 Ub ligases, Ubc14 (predicted)	GO:0048518	positive regulation of biological process	BP	1	0.287169	1	3.96761		FALSE	TRUE	FALSE
SPAC1250.03	ubiquitin conjugating enzyme E2 for HECT-type and RBR family E3 Ub ligases, Ubc14 (predicted)	GO:0048522	positive regulation of cellular process	BP	1	0.221996	1	3.98189		FALSE	TRUE	FALSE
SPAC1250.03	ubiquitin conjugating enzyme E2 for HECT-type and RBR family E3 Ub ligases, Ubc14 (predicted)	GO:0050794	regulation of cellular process	BP	1	0.488798	1	2.8982		FALSE	TRUE	FALSE
SPAC10F6.10	protein kinase, RIO family Rio1 (predicted)	GO:0050794	regulation of cellular process	BP	1	0.10387	1	2.8982		FALSE	TRUE	FALSE
SPBC713.06	DNA ligase (predicted)	GO:0006281	DNA repair	BP	1	0.478615	1	5.09234	automatic	FALSE	TRUE	FALSE
SPBC713.06	DNA ligase (predicted)	GO:0006974	cellular response to DNA damage stimulus	BP	1	0.464358	1	4.75814	automatic	FALSE	TRUE	FALSE
SPBC713.06	DNA ligase (predicted)	GO:0006950	response to stress	BP	1	0.472505	1	4.13256	automatic	FALSE	TRUE	FALSE
SPBC713.06	DNA ligase (predicted)	GO:0050896	response to stimulus	BP	1	0.486762	1	4.04113	automatic	FALSE	TRUE	FALSE
SPBC713.06	DNA ligase (predicted)	GO:0033554	cellular response to stress	BP	1	0.545825	1	4.13866	automatic	FALSE	TRUE	FALSE
SPBC713.06	DNA ligase (predicted)	GO:0051716	cellular response to stimulus	BP	1	0.435845	1	4.04948	automatic	FALSE	TRUE	FALSE
SPBC23G7.05	translation initiation factor eIF1	GO:0034622	cellular protein-containing complex assembly	BP	1	0.124236	1	5.05342		FALSE	TRUE	FALSE
SPBC23G7.05	translation initiation factor eIF1	GO:0016043	cellular component organization	BP	1	0.11609	1	3.17343		FALSE	TRUE	FALSE
SPBC23G7.05	translation initiation factor eIF1	GO:0009059	macromolecule biosynthetic process	BP	1	0.484725	1	3.92473	curated	FALSE	TRUE	FALSE
SPCC1739.06c	uroporphyrin methyltransferase Met1	GO:1901566	organonitrogen compound biosynthetic process	BP	1	0.321792	1	3.94847	automatic	FALSE	FALSE	FALSE
SPAC22F3.05c	GTP-binding protein involved in beta-tubulin folding Alp41	GO:0046907	intracellular transport	BP	1	0.197556	1	4.17446		FALSE	TRUE	FALSE
SPAC22F3.05c	GTP-binding protein involved in beta-tubulin folding Alp41	GO:0051234	establishment of localization	BP	1	0.232179	1	3.47657		FALSE	TRUE	FALSE
SPAC22F3.05c	GTP-binding protein involved in beta-tubulin folding Alp41	GO:0051179	localization	BP	1	0.303462	1	3.1988		FALSE	TRUE	FALSE
SPAC22F3.05c	GTP-binding protein involved in beta-tubulin folding Alp41	GO:0051641	cellular localization	BP	1	0.285132	1	3.67383		FALSE	TRUE	FALSE
SPAC22F3.05c	GTP-binding protein involved in beta-tubulin folding Alp41	GO:0006810	transport	BP	1	0.175153	1	3.50456		FALSE	TRUE	FALSE
SPBC1734.15	RSC complex subunit Rsc4	GO:1903506	regulation of nucleic acid-templated transcription	BP	1	0.539715	1	4.18242		FALSE	TRUE	FALSE
SPBC1734.15	RSC complex subunit Rsc4	GO:0031324	negative regulation of cellular metabolic process	BP	1	0.112016	1	4.84721		FALSE	TRUE	FALSE
SPBC1734.15	RSC complex subunit Rsc4	GO:0031323	regulation of cellular metabolic process	BP	1	0.533605	1	3.69519		FALSE	TRUE	FALSE
SPBC1734.15	RSC complex subunit Rsc4	GO:0051253	negative regulation of RNA metabolic process	BP	1	0.118126	1	5.38002		FALSE	TRUE	FALSE
SPBC1734.15	RSC complex subunit Rsc4	GO:0048523	negative regulation of cellular process	BP	1	0.209776	1	4.08943		FALSE	TRUE	FALSE
SPBC1734.15	RSC complex subunit Rsc4	GO:0051171	regulation of nitrogen compound metabolic process	BP	1	0.556008	1	3.77908		FALSE	TRUE	FALSE
SPBC1734.15	RSC complex subunit Rsc4	GO:0045934	negative regulation of nucleobase-containing compound metabolic process	BP	1	0.136456	1	5.21459		FALSE	TRUE	FALSE
SPBC1734.15	RSC complex subunit Rsc4	GO:1903507	negative regulation of nucleic acid-templated transcription	BP	1	0.105906	1	5.42327		FALSE	TRUE	FALSE
SPBC1734.15	RSC complex subunit Rsc4	GO:0080090	regulation of primary metabolic process	BP	1	0.535642	1	3.74241		FALSE	TRUE	FALSE
SPBC1734.15	RSC complex subunit Rsc4	GO:0045892	negative regulation of transcription, DNA-templated	BP	1	0.120163	1	5.42327		FALSE	TRUE	FALSE
SPBC1734.15	RSC complex subunit Rsc4	GO:0009889	regulation of biosynthetic process	BP	1	0.572301	1	3.91981		FALSE	TRUE	FALSE
SPBC1734.15	RSC complex subunit Rsc4	GO:0019219	regulation of nucleobase-containing compound metabolic process	BP	1	0.437882	1	3.97408		FALSE	TRUE	FALSE
SPBC1734.15	RSC complex subunit Rsc4	GO:0010558	negative regulation of macromolecule biosynthetic process	BP	1	0.12831	1	5.10834		FALSE	TRUE	FALSE
SPBC1734.15	RSC complex subunit Rsc4	GO:0006355	regulation of transcription, DNA-templated	BP	1	0.460285	1	4.19205		FALSE	TRUE	FALSE
SPBC1734.15	RSC complex subunit Rsc4	GO:2000113	negative regulation of cellular macromolecule biosynthetic process	BP	1	0.177189	1	5.10834		FALSE	TRUE	FALSE
SPBC1734.15	RSC complex subunit Rsc4	GO:0048519	negative regulation of biological process	BP	1	0.248473	1	3.83054		FALSE	TRUE	FALSE
SPBC1734.15	RSC complex subunit Rsc4	GO:0009890	negative regulation of biosynthetic process	BP	1	0.11609	1	5.04204		FALSE	TRUE	FALSE
SPBC1734.15	RSC complex subunit Rsc4	GO:0006357	regulation of transcription by RNA polymerase II	BP	1	0.248473	1	4.46479		FALSE	TRUE	FALSE
SPBC1734.15	RSC complex subunit Rsc4	GO:0060255	regulation of macromolecule metabolic process	BP	1	0.562118	1	3.55445		FALSE	TRUE	FALSE
SPBC1734.15	RSC complex subunit Rsc4	GO:0010629	negative regulation of gene expression	BP	1	0.126273	1	4.67112		FALSE	TRUE	FALSE
SPBC1734.15	RSC complex subunit Rsc4	GO:0010468	regulation of gene expression	BP	1	0.470468	1	3.8283		FALSE	TRUE	FALSE
SPBC1734.15	RSC complex subunit Rsc4	GO:0051252	regulation of RNA metabolic process	BP	1	0.448065	1	4.14479		FALSE	TRUE	FALSE
SPBC1734.15	RSC complex subunit Rsc4	GO:2001141	regulation of RNA biosynthetic process	BP	1	0.443992	1	4.18082		FALSE	TRUE	FALSE
SPBC1734.15	RSC complex subunit Rsc4	GO:0019222	regulation of metabolic process	BP	1	0.531568	1	3.51189		FALSE	TRUE	FALSE
SPBC1734.15	RSC complex subunit Rsc4	GO:0050794	regulation of cellular process	BP	1	0.570265	1	2.8982		FALSE	TRUE	FALSE
SPBC1734.15	RSC complex subunit Rsc4	GO:0031327	negative regulation of cellular biosynthetic process	BP	1	0.105906	1	5.04204		FALSE	TRUE	FALSE
SPBC1734.15	RSC complex subunit Rsc4	GO:2000112	regulation of cellular macromolecule biosynthetic process	BP	1	0.486762	1	3.96376		FALSE	TRUE	FALSE
SPBC1734.15	RSC complex subunit Rsc4	GO:0010556	regulation of macromolecule biosynthetic process	BP	1	0.494908	1	3.95481		FALSE	TRUE	FALSE
SPBC1734.15	RSC complex subunit Rsc4	GO:0010605	negative regulation of macromolecule metabolic process	BP	1	0.101833	1	4.41117		FALSE	TRUE	FALSE
SPBC1734.15	RSC complex subunit Rsc4	GO:0031326	regulation of cellular biosynthetic process	BP	1	0.498982	1	3.91981		FALSE	TRUE	FALSE
SPBC1734.15	RSC complex subunit Rsc4	GO:0006950	response to stress	BP	1	0.124236	1	4.13256		FALSE	TRUE	FALSE
SPBC1734.15	RSC complex subunit Rsc4	GO:0050896	response to stimulus	BP	1	0.126273	1	4.04113		FALSE	TRUE	FALSE
SPBC1734.15	RSC complex subunit Rsc4	GO:0033554	cellular response to stress	BP	1	0.138493	1	4.13866		FALSE	TRUE	FALSE
SPBC1734.15	RSC complex subunit Rsc4	GO:0006259	DNA metabolic process	BP	1	0.12831	1	4.14019		FALSE	TRUE	FALSE
SPBC1734.15	RSC complex subunit Rsc4	GO:0051716	cellular response to stimulus	BP	1	0.107943	1	4.04948		FALSE	TRUE	FALSE
SPBC1734.15	RSC complex subunit Rsc4	GO:0071824	protein-DNA complex subunit organization	BP	1	0.197556	1	5.89438		FALSE	TRUE	FALSE
SPBC1734.15	RSC complex subunit Rsc4	GO:0034728	nucleosome organization	BP	1	0.118126	1	6.23974		FALSE	TRUE	FALSE
SPBC1734.15	RSC complex subunit Rsc4	GO:0043933	protein-containing complex subunit organization	BP	1	0.199593	1	4.76383		FALSE	TRUE	FALSE
SPBC1734.15	RSC complex subunit Rsc4	GO:0006338	chromatin remodeling	BP	1	0.203666	1	5.1246	curated	FALSE	TRUE	FALSE
SPAC57A10.10c	La protein homolog	GO:0006396	RNA processing	BP	1	0.319756	1	4.40317	experimental	FALSE	TRUE	FALSE
SPAC57A10.10c	La protein homolog	GO:0034470	ncRNA processing	BP	1	0.254582	1	4.85971	experimental	FALSE	TRUE	FALSE
SPAC57A10.10c	La protein homolog	GO:0034660	ncRNA metabolic process	BP	1	0.368635	1	4.55334	experimental	FALSE	TRUE	FALSE
SPAPB1E7.02c	DNA polymerase alpha accessory factor Mcl1	GO:0006974	cellular response to DNA damage stimulus	BP	1	0.285132	1	4.75814	experimental	FALSE	TRUE	FALSE
SPAC31A2.02	eRF1 methyltransferase complex and tRNA (m2G10) methyltransferase complex regulatory subunit Trm112 (predicted)	GO:0006364	rRNA processing	BP	1	0.114053	1	5.35391		FALSE	TRUE	FALSE
SPAC31A2.02	eRF1 methyltransferase complex and tRNA (m2G10) methyltransferase complex regulatory subunit Trm112 (predicted)	GO:0016072	rRNA metabolic process	BP	1	0.142566	1	5.21012		FALSE	TRUE	FALSE
SPAC31A2.02	eRF1 methyltransferase complex and tRNA (m2G10) methyltransferase complex regulatory subunit Trm112 (predicted)	GO:0022613	ribonucleoprotein complex biogenesis	BP	1	0.160896	1	5.93042		FALSE	TRUE	FALSE
SPAC31A2.02	eRF1 methyltransferase complex and tRNA (m2G10) methyltransferase complex regulatory subunit Trm112 (predicted)	GO:0044085	cellular component biogenesis	BP	1	0.130346	1	5.63133		FALSE	TRUE	FALSE
SPCC132.01c	microtubule regulator Mtr1	GO:0051171	regulation of nitrogen compound metabolic process	BP	1	0.114053	1	3.77908		FALSE	TRUE	FALSE
SPCC132.01c	microtubule regulator Mtr1	GO:0019222	regulation of metabolic process	BP	1	0.154786	1	3.51189		FALSE	TRUE	FALSE
SPCC132.01c	microtubule regulator Mtr1	GO:0050794	regulation of cellular process	BP	1	0.195519	1	2.8982		FALSE	TRUE	FALSE
SPCC132.01c	microtubule regulator Mtr1	GO:0060255	regulation of macromolecule metabolic process	BP	1	0.14053	1	3.55445		FALSE	TRUE	FALSE
SPCC132.01c	microtubule regulator Mtr1	GO:0080090	regulation of primary metabolic process	BP	1	0.112016	1	3.74241		FALSE	TRUE	FALSE
SPCC132.01c	microtubule regulator Mtr1	GO:0031323	regulation of cellular metabolic process	BP	1	0.11609	1	3.69519		FALSE	TRUE	FALSE
SPBC365.10	Ino80 complex actin-like protein Arp5	GO:0006974	cellular response to DNA damage stimulus	BP	1	0.120163	1	4.75814		FALSE	TRUE	FALSE
SPBC365.10	Ino80 complex actin-like protein Arp5	GO:0006950	response to stress	BP	1	0.14053	1	4.13256		FALSE	TRUE	FALSE
SPBC365.10	Ino80 complex actin-like protein Arp5	GO:0050896	response to stimulus	BP	1	0.12831	1	4.04113		FALSE	TRUE	FALSE
SPBC365.10	Ino80 complex actin-like protein Arp5	GO:0033554	cellular response to stress	BP	1	0.14053	1	4.13866		FALSE	TRUE	FALSE
SPBC365.10	Ino80 complex actin-like protein Arp5	GO:0006259	DNA metabolic process	BP	1	0.150713	1	4.14019		FALSE	TRUE	FALSE
SPBC365.10	Ino80 complex actin-like protein Arp5	GO:0090304	nucleic acid metabolic process	BP	1	0.348269	1	3.20299		FALSE	TRUE	FALSE
SPBC365.10	Ino80 complex actin-like protein Arp5	GO:0051716	cellular response to stimulus	BP	1	0.150713	1	4.04948		FALSE	TRUE	FALSE
SPCC622.14	GTPase activating protein (predicted)	GO:0016043	cellular component organization	BP	1	0.272912	1	3.17343		FALSE	TRUE	FALSE
SPAC139.03	transcription factor, zf-fungal binuclear cluster type (predicted)	GO:0006357	regulation of transcription by RNA polymerase II	BP	1	0.12831	1	4.46479	experimental	FALSE	FALSE	FALSE
SPBC30B4.04c	SWI/SNF complex subunit Sol1	GO:0006357	regulation of transcription by RNA polymerase II	BP	1	0.10998	1	4.46479	experimental	FALSE	TRUE	FALSE
SPAC2C4.11c	KH domain RNA-binding protein Pno1 (predicted)	GO:0006364	rRNA processing	BP	1	0.289206	1	5.35391	curated	FALSE	TRUE	FALSE
SPAC2C4.11c	KH domain RNA-binding protein Pno1 (predicted)	GO:0016043	cellular component organization	BP	1	0.107943	1	3.17343		FALSE	TRUE	FALSE
SPAC2C4.11c	KH domain RNA-binding protein Pno1 (predicted)	GO:0043933	protein-containing complex subunit organization	BP	1	0.105906	1	4.76383		FALSE	TRUE	FALSE
SPAC1556.04c	cytidine deaminase Ccd1 (predicted)	GO:1901135	carbohydrate derivative metabolic process	BP	1	0.205703	1	4.98698	automatic	FALSE	TRUE	FALSE
SPAC1556.04c	cytidine deaminase Ccd1 (predicted)	GO:0044281	small molecule metabolic process	BP	1	0.417515	1	3.83054	automatic	FALSE	TRUE	FALSE
SPAC1556.04c	cytidine deaminase Ccd1 (predicted)	GO:0055086	nucleobase-containing small molecule metabolic process	BP	1	0.260692	1	5.04582	automatic	FALSE	TRUE	FALSE
SPAC1556.04c	cytidine deaminase Ccd1 (predicted)	GO:0044270	cellular nitrogen compound catabolic process	BP	1	0.11609	1	5.13697	automatic	FALSE	TRUE	FALSE
SPAC1556.04c	cytidine deaminase Ccd1 (predicted)	GO:1901575	organic substance catabolic process	BP	1	0.221996	1	4.16657	automatic	FALSE	TRUE	FALSE
SPAC1556.04c	cytidine deaminase Ccd1 (predicted)	GO:0009056	catabolic process	BP	1	0.211813	1	4.05509	automatic	FALSE	TRUE	FALSE
SPAC1556.04c	cytidine deaminase Ccd1 (predicted)	GO:1901565	organonitrogen compound catabolic process	BP	1	0.10998	1	5.06108	automatic	FALSE	TRUE	FALSE
SPAC1556.04c	cytidine deaminase Ccd1 (predicted)	GO:0046700	heterocycle catabolic process	BP	1	0.112016	1	5.13283	automatic	FALSE	TRUE	FALSE
SPAC1556.04c	cytidine deaminase Ccd1 (predicted)	GO:0044282	small molecule catabolic process	BP	1	0.101833	1	6.00665	automatic	FALSE	TRUE	FALSE
SPAC1556.04c	cytidine deaminase Ccd1 (predicted)	GO:0044248	cellular catabolic process	BP	1	0.179226	1	4.14326	automatic	FALSE	TRUE	FALSE
SPAC1556.04c	cytidine deaminase Ccd1 (predicted)	GO:1901361	organic cyclic compound catabolic process	BP	1	0.124236	1	5.1246	automatic	FALSE	TRUE	FALSE
SPAC19A8.14	mitochondrial aminoacyl-tRNA hydrolase Pth2 (predicted)	GO:0050794	regulation of cellular process	BP	1	0.126273	1	2.8982		FALSE	TRUE	FALSE
SPBC3D6.08c	mRNA decapping complex subunit (predicted)	GO:0006397	mRNA processing	BP	1	0.244399	1	5.63816		FALSE	TRUE	FALSE
SPBC3D6.08c	mRNA decapping complex subunit (predicted)	GO:0006396	RNA processing	BP	1	0.281059	1	4.40317		FALSE	TRUE	FALSE
SPBP22H7.02c	ribosome biogenesis RNA-binding protein Mrd1 (predicted)	GO:0006364	rRNA processing	BP	1	0.211813	1	5.35391	curated	FALSE	TRUE	FALSE
SPBC23E6.01c	splicing factor Cxr1	GO:0051252	regulation of RNA metabolic process	BP	1	0.384929	1	4.14479		FALSE	TRUE	FALSE
SPBC23E6.01c	splicing factor Cxr1	GO:0019219	regulation of nucleobase-containing compound metabolic process	BP	1	0.362525	1	3.97408		FALSE	TRUE	FALSE
SPBC23E6.01c	splicing factor Cxr1	GO:0051171	regulation of nitrogen compound metabolic process	BP	1	0.325866	1	3.77908		FALSE	TRUE	FALSE
SPBC23E6.01c	splicing factor Cxr1	GO:0019222	regulation of metabolic process	BP	1	0.334012	1	3.51189		FALSE	TRUE	FALSE
SPBC23E6.01c	splicing factor Cxr1	GO:0050794	regulation of cellular process	BP	1	0.323829	1	2.8982		FALSE	TRUE	FALSE
SPBC23E6.01c	splicing factor Cxr1	GO:0060255	regulation of macromolecule metabolic process	BP	1	0.279022	1	3.55445		FALSE	TRUE	FALSE
SPBC23E6.01c	splicing factor Cxr1	GO:0080090	regulation of primary metabolic process	BP	1	0.446029	1	3.74241		FALSE	TRUE	FALSE
SPBC23E6.01c	splicing factor Cxr1	GO:0031323	regulation of cellular metabolic process	BP	1	0.346232	1	3.69519		FALSE	TRUE	FALSE
SPBC23E6.01c	splicing factor Cxr1	GO:0010468	regulation of gene expression	BP	1	0.395112	1	3.8283		FALSE	TRUE	FALSE
SPBC23E6.01c	splicing factor Cxr1	GO:0010604	positive regulation of macromolecule metabolic process	BP	1	0.266802	1	4.78988		FALSE	TRUE	FALSE
SPBC23E6.01c	splicing factor Cxr1	GO:0009893	positive regulation of metabolic process	BP	1	0.132383	1	4.74684		FALSE	TRUE	FALSE
SPBC23E6.01c	splicing factor Cxr1	GO:0048518	positive regulation of biological process	BP	1	0.254582	1	3.96761		FALSE	TRUE	FALSE
SPCC320.11c	RNA-binding ribosome biogenesis protein Nip7 (predicted)	GO:0006396	RNA processing	BP	1	0.397149	1	4.40317		FALSE	TRUE	FALSE
SPCC320.11c	RNA-binding ribosome biogenesis protein Nip7 (predicted)	GO:0006364	rRNA processing	BP	1	0.13442	1	5.35391		FALSE	TRUE	FALSE
SPCC320.11c	RNA-binding ribosome biogenesis protein Nip7 (predicted)	GO:0034470	ncRNA processing	BP	1	0.427699	1	4.85971		FALSE	TRUE	FALSE
SPCC320.11c	RNA-binding ribosome biogenesis protein Nip7 (predicted)	GO:0016070	RNA metabolic process	BP	1	0.476578	1	3.70307		FALSE	TRUE	FALSE
SPCC320.11c	RNA-binding ribosome biogenesis protein Nip7 (predicted)	GO:0016072	rRNA metabolic process	BP	1	0.285132	1	5.21012		FALSE	TRUE	FALSE
SPCC320.11c	RNA-binding ribosome biogenesis protein Nip7 (predicted)	GO:0034660	ncRNA metabolic process	BP	1	0.450102	1	4.55334		FALSE	TRUE	FALSE
SPCC320.11c	RNA-binding ribosome biogenesis protein Nip7 (predicted)	GO:0090304	nucleic acid metabolic process	BP	1	0.511202	1	3.20299		FALSE	TRUE	FALSE
SPCC320.11c	RNA-binding ribosome biogenesis protein Nip7 (predicted)	GO:0022613	ribonucleoprotein complex biogenesis	BP	1	0.232179	1	5.93042	curated	FALSE	TRUE	FALSE
SPCC320.11c	RNA-binding ribosome biogenesis protein Nip7 (predicted)	GO:0044085	cellular component biogenesis	BP	1	0.158859	1	5.63133	curated	FALSE	TRUE	FALSE
SPCP1E11.08	ribosome biogenesis protein Nsa2 (predicted)	GO:0006396	RNA processing	BP	1	0.336049	1	4.40317		FALSE	TRUE	FALSE
SPCP1E11.08	ribosome biogenesis protein Nsa2 (predicted)	GO:0006364	rRNA processing	BP	1	0.270876	1	5.35391		FALSE	TRUE	FALSE
SPCP1E11.08	ribosome biogenesis protein Nsa2 (predicted)	GO:0034470	ncRNA processing	BP	1	0.352342	1	4.85971		FALSE	TRUE	FALSE
SPCP1E11.08	ribosome biogenesis protein Nsa2 (predicted)	GO:0016070	RNA metabolic process	BP	1	0.462322	1	3.70307		FALSE	TRUE	FALSE
SPCP1E11.08	ribosome biogenesis protein Nsa2 (predicted)	GO:0016072	rRNA metabolic process	BP	1	0.362525	1	5.21012		FALSE	TRUE	FALSE
SPCP1E11.08	ribosome biogenesis protein Nsa2 (predicted)	GO:0034660	ncRNA metabolic process	BP	1	0.319756	1	4.55334		FALSE	TRUE	FALSE
SPCP1E11.08	ribosome biogenesis protein Nsa2 (predicted)	GO:0090304	nucleic acid metabolic process	BP	1	0.476578	1	3.20299		FALSE	TRUE	FALSE
SPAC343.09	UBX domain protein Ubx3, Cdc48 cofactor	GO:0043161	proteasome-mediated ubiquitin-dependent protein catabolic process	BP	1	0.189409	1	5.4978	experimental	FALSE	TRUE	FALSE
SPAC57A10.05c	F-box/WD repeat protein Pof1	GO:0006355	regulation of transcription, DNA-templated	BP	1	0.11609	1	4.19205		FALSE	TRUE	FALSE
SPAC57A10.05c	F-box/WD repeat protein Pof1	GO:1903506	regulation of nucleic acid-templated transcription	BP	1	0.120163	1	4.18242		FALSE	TRUE	FALSE
SPAC57A10.05c	F-box/WD repeat protein Pof1	GO:0051171	regulation of nitrogen compound metabolic process	BP	1	0.201629	1	3.77908		FALSE	TRUE	FALSE
SPAC57A10.05c	F-box/WD repeat protein Pof1	GO:0010468	regulation of gene expression	BP	1	0.142566	1	3.8283		FALSE	TRUE	FALSE
SPAC57A10.05c	F-box/WD repeat protein Pof1	GO:2001141	regulation of RNA biosynthetic process	BP	1	0.148676	1	4.18082		FALSE	TRUE	FALSE
SPAC57A10.05c	F-box/WD repeat protein Pof1	GO:0019222	regulation of metabolic process	BP	1	0.285132	1	3.51189		FALSE	TRUE	FALSE
SPAC57A10.05c	F-box/WD repeat protein Pof1	GO:0050794	regulation of cellular process	BP	1	0.354379	1	2.8982		FALSE	TRUE	FALSE
SPAC57A10.05c	F-box/WD repeat protein Pof1	GO:0060255	regulation of macromolecule metabolic process	BP	1	0.207739	1	3.55445		FALSE	TRUE	FALSE
SPAC57A10.05c	F-box/WD repeat protein Pof1	GO:2000112	regulation of cellular macromolecule biosynthetic process	BP	1	0.181263	1	3.96376		FALSE	TRUE	FALSE
SPAC57A10.05c	F-box/WD repeat protein Pof1	GO:0080090	regulation of primary metabolic process	BP	1	0.221996	1	3.74241		FALSE	TRUE	FALSE
SPAC57A10.05c	F-box/WD repeat protein Pof1	GO:0010556	regulation of macromolecule biosynthetic process	BP	1	0.213849	1	3.95481		FALSE	TRUE	FALSE
SPAC57A10.05c	F-box/WD repeat protein Pof1	GO:0031323	regulation of cellular metabolic process	BP	1	0.287169	1	3.69519		FALSE	TRUE	FALSE
SPAC57A10.05c	F-box/WD repeat protein Pof1	GO:0009889	regulation of biosynthetic process	BP	1	0.219959	1	3.91981		FALSE	TRUE	FALSE
SPAC57A10.05c	F-box/WD repeat protein Pof1	GO:0019219	regulation of nucleobase-containing compound metabolic process	BP	1	0.173116	1	3.97408		FALSE	TRUE	FALSE
SPAC57A10.05c	F-box/WD repeat protein Pof1	GO:0031326	regulation of cellular biosynthetic process	BP	1	0.205703	1	3.91981		FALSE	TRUE	FALSE
SPAC57A10.05c	F-box/WD repeat protein Pof1	GO:0006464	cellular protein modification process	BP	1	0.228106	1	4.25702		FALSE	TRUE	FALSE
SPAC57A10.05c	F-box/WD repeat protein Pof1	GO:0036211	protein modification process	BP	1	0.205703	1	4.25702		FALSE	TRUE	FALSE
SPAC57A10.05c	F-box/WD repeat protein Pof1	GO:0043412	macromolecule modification	BP	1	0.209776	1	4.03422		FALSE	TRUE	FALSE
SPAC57A10.05c	F-box/WD repeat protein Pof1	GO:0044267	cellular protein metabolic process	BP	1	0.195519	1	3.76847	curated	FALSE	TRUE	FALSE
SPAC57A10.05c	F-box/WD repeat protein Pof1	GO:0042221	response to chemical	BP	1	0.142566	1	5.41228		FALSE	TRUE	FALSE
SPAC57A10.05c	F-box/WD repeat protein Pof1	GO:0050896	response to stimulus	BP	1	0.228106	1	4.04113		FALSE	TRUE	FALSE
SPBC2G5.07c	DNA-directed RNA polymerase III complex subunit Rpc25	GO:0034645	cellular macromolecule biosynthetic process	BP	1	0.350305	1	4.06357	curated	FALSE	TRUE	FALSE
SPCC4G3.05c	Holliday junction resolvase subunit Mus81	GO:0006996	organelle organization	BP	1	0.230143	1	4.03836	experimental	FALSE	TRUE	FALSE
SPCC4G3.05c	Holliday junction resolvase subunit Mus81	GO:0051276	chromosome organization	BP	1	0.315682	1	4.85033		FALSE	TRUE	FALSE
SPCC4G3.05c	Holliday junction resolvase subunit Mus81	GO:0016043	cellular component organization	BP	1	0.454175	1	3.17343	experimental	FALSE	TRUE	FALSE
SPAC2C4.15c	UBX domain protein Ubx2	GO:0043161	proteasome-mediated ubiquitin-dependent protein catabolic process	BP	1	0.185336	1	5.4978	experimental	FALSE	TRUE	FALSE
SPCC1223.05c	60S ribosomal protein L37 (predicted)	GO:0090304	nucleic acid metabolic process	BP	1	0.112016	1	3.20299		FALSE	TRUE	FALSE
SPAC19A8.13	U1 snRNP-associated protein Usp101	GO:0000398	mRNA splicing, via spliceosome	BP	1	0.384929	1	5.91224	curated	FALSE	TRUE	FALSE
SPAC19A8.13	U1 snRNP-associated protein Usp101	GO:0006396	RNA processing	BP	1	0.470468	1	4.40317	curated	FALSE	TRUE	FALSE
SPAC19A8.13	U1 snRNP-associated protein Usp101	GO:0006397	mRNA processing	BP	1	0.450102	1	5.63816	curated	FALSE	TRUE	FALSE
SPAC19A8.13	U1 snRNP-associated protein Usp101	GO:0000377	RNA splicing, via transesterification reactions with bulged adenosine as nucleophile	BP	1	0.303462	1	5.91224	curated	FALSE	TRUE	FALSE
SPAC19A8.13	U1 snRNP-associated protein Usp101	GO:0016071	mRNA metabolic process	BP	1	0.405295	1	4.88519	curated	FALSE	TRUE	FALSE
SPAC19A8.13	U1 snRNP-associated protein Usp101	GO:0016070	RNA metabolic process	BP	1	0.541752	1	3.70307	curated	FALSE	TRUE	FALSE
SPAC19A8.13	U1 snRNP-associated protein Usp101	GO:0008380	RNA splicing	BP	1	0.325866	1	5.87683	curated	FALSE	TRUE	FALSE
SPAC19A8.13	U1 snRNP-associated protein Usp101	GO:0090304	nucleic acid metabolic process	BP	1	0.610998	1	3.20299	curated	FALSE	TRUE	FALSE
SPAC19A8.13	U1 snRNP-associated protein Usp101	GO:0000375	RNA splicing, via transesterification reactions	BP	1	0.301426	1	5.89438	curated	FALSE	TRUE	FALSE
SPAP27G11.07c	EKC/KEOPS complex associated ATPase Bud32 (predicted)	GO:0019538	protein metabolic process	BP	1	0.150713	1	3.49327		FALSE	TRUE	FALSE
SPBC4F6.10	guanyl-nucleotide exchange factor Vps902	GO:0045184	establishment of protein localization	BP	1	0.348269	1	4.68952		FALSE	TRUE	FALSE
SPBC4F6.10	guanyl-nucleotide exchange factor Vps902	GO:0015031	protein transport	BP	1	0.315682	1	4.73012		FALSE	TRUE	FALSE
SPBC4F6.10	guanyl-nucleotide exchange factor Vps902	GO:0033365	protein localization to organelle	BP	1	0.114053	1	4.96928		FALSE	TRUE	FALSE
SPBC4F6.10	guanyl-nucleotide exchange factor Vps902	GO:0051641	cellular localization	BP	1	0.498982	1	3.67383		FALSE	TRUE	FALSE
SPBC4F6.10	guanyl-nucleotide exchange factor Vps902	GO:0070727	cellular macromolecule localization	BP	1	0.156823	1	4.47116		FALSE	TRUE	FALSE
SPBC4F6.10	guanyl-nucleotide exchange factor Vps902	GO:0071705	nitrogen compound transport	BP	1	0.287169	1	4.27088		FALSE	TRUE	FALSE
SPBC4F6.10	guanyl-nucleotide exchange factor Vps902	GO:0007034	vacuolar transport	BP	1	0.211813	1	5.68729		FALSE	TRUE	FALSE
SPBC4F6.10	guanyl-nucleotide exchange factor Vps902	GO:0034613	cellular protein localization	BP	1	0.144603	1	4.47758		FALSE	TRUE	FALSE
SPBC4F6.10	guanyl-nucleotide exchange factor Vps902	GO:0006886	intracellular protein transport	BP	1	0.114053	1	4.76669		FALSE	TRUE	FALSE
SPBC4F6.10	guanyl-nucleotide exchange factor Vps902	GO:0046907	intracellular transport	BP	1	0.472505	1	4.17446		FALSE	TRUE	FALSE
SPBC4F6.10	guanyl-nucleotide exchange factor Vps902	GO:0042886	amide transport	BP	1	0.382892	1	4.6328		FALSE	TRUE	FALSE
SPBC4F6.10	guanyl-nucleotide exchange factor Vps902	GO:0033036	macromolecule localization	BP	1	0.344196	1	4.13408		FALSE	TRUE	FALSE
SPBC4F6.10	guanyl-nucleotide exchange factor Vps902	GO:0008104	protein localization	BP	1	0.376782	1	4.14326		FALSE	TRUE	FALSE
SPBC4F6.10	guanyl-nucleotide exchange factor Vps902	GO:0071702	organic substance transport	BP	1	0.295316	1	4.15874		FALSE	TRUE	FALSE
SPBC4F6.10	guanyl-nucleotide exchange factor Vps902	GO:0015833	peptide transport	BP	1	0.344196	1	4.66076		FALSE	TRUE	FALSE
SPBC4F6.10	guanyl-nucleotide exchange factor Vps902	GO:0048193	Golgi vesicle transport	BP	1	0.191446	1	5.60449		FALSE	TRUE	FALSE
SPBC4F6.10	guanyl-nucleotide exchange factor Vps902	GO:0016192	vesicle-mediated transport	BP	1	0.417515	1	4.73012	curated	FALSE	TRUE	FALSE
SPBC4F6.10	guanyl-nucleotide exchange factor Vps902	GO:0006996	organelle organization	BP	1	0.114053	1	4.03836		FALSE	TRUE	FALSE
SPBC4F6.10	guanyl-nucleotide exchange factor Vps902	GO:0016043	cellular component organization	BP	1	0.274949	1	3.17343		FALSE	TRUE	FALSE
SPAC1296.02	cytochrome c oxidase subunit IV (predicted)	GO:0022607	cellular component assembly	BP	1	0.107943	1	4.31549		FALSE	TRUE	FALSE
SPAC1296.02	cytochrome c oxidase subunit IV (predicted)	GO:0065003	protein-containing complex assembly	BP	1	0.130346	1	5.03827		FALSE	TRUE	FALSE
SPAC1296.02	cytochrome c oxidase subunit IV (predicted)	GO:0043933	protein-containing complex subunit organization	BP	1	0.14664	1	4.76383		FALSE	TRUE	FALSE
SPAC1296.02	cytochrome c oxidase subunit IV (predicted)	GO:0034622	cellular protein-containing complex assembly	BP	1	0.126273	1	5.05342		FALSE	TRUE	FALSE
SPAC1296.02	cytochrome c oxidase subunit IV (predicted)	GO:0016043	cellular component organization	BP	1	0.199593	1	3.17343		FALSE	TRUE	FALSE
SPAC2C4.16c	40S ribosomal protein S8 (predicted)	GO:0006396	RNA processing	BP	1	0.132383	1	4.40317		FALSE	TRUE	FALSE
SPAC2C4.16c	40S ribosomal protein S8 (predicted)	GO:0016070	RNA metabolic process	BP	1	0.201629	1	3.70307		FALSE	TRUE	FALSE
SPAC2C4.16c	40S ribosomal protein S8 (predicted)	GO:0090304	nucleic acid metabolic process	BP	1	0.224033	1	3.20299		FALSE	TRUE	FALSE
SPAC521.05	40S ribosomal protein S8 (predicted)	GO:0006396	RNA processing	BP	1	0.118126	1	4.40317		FALSE	TRUE	FALSE
SPAC521.05	40S ribosomal protein S8 (predicted)	GO:0016070	RNA metabolic process	BP	1	0.199593	1	3.70307		FALSE	TRUE	FALSE
SPAC521.05	40S ribosomal protein S8 (predicted)	GO:0016072	rRNA metabolic process	BP	1	0.114053	1	5.21012		FALSE	TRUE	FALSE
SPAC521.05	40S ribosomal protein S8 (predicted)	GO:0034660	ncRNA metabolic process	BP	1	0.13442	1	4.55334		FALSE	TRUE	FALSE
SPAC521.05	40S ribosomal protein S8 (predicted)	GO:0090304	nucleic acid metabolic process	BP	1	0.236253	1	3.20299		FALSE	TRUE	FALSE
SPCC126.12	GTP cyclohydrolase (predicted)	GO:0050794	regulation of cellular process	BP	1	0.130346	1	2.8982		TRUE	TRUE	TRUE
SPBC365.09c	human KIN ortholog (predicted)	GO:0033554	cellular response to stress	BP	1	0.215886	1	4.13866		FALSE	TRUE	FALSE
SPBC365.09c	human KIN ortholog (predicted)	GO:0051716	cellular response to stimulus	BP	1	0.219959	1	4.04948		FALSE	TRUE	FALSE
SPBC365.09c	human KIN ortholog (predicted)	GO:0006950	response to stress	BP	1	0.187373	1	4.13256		FALSE	TRUE	FALSE
SPBC365.09c	human KIN ortholog (predicted)	GO:0050896	response to stimulus	BP	1	0.156823	1	4.04113		FALSE	TRUE	FALSE
SPBC2G5.06c	sulfide-quinone oxidoreductase	GO:0017144	drug metabolic process	BP	1	0.171079	1	10.6218		FALSE	TRUE	FALSE
SPAC1486.09	ribosome biogenesis protein Nob1 (predicted)	GO:0006364	rRNA processing	BP	1	0.191446	1	5.35391	curated	FALSE	TRUE	FALSE
SPAC1486.09	ribosome biogenesis protein Nob1 (predicted)	GO:0006396	RNA processing	BP	1	0.527495	1	4.40317	curated	FALSE	TRUE	FALSE
SPAC1486.09	ribosome biogenesis protein Nob1 (predicted)	GO:0034470	ncRNA processing	BP	1	0.494908	1	4.85971	curated	FALSE	TRUE	FALSE
SPAC1486.09	ribosome biogenesis protein Nob1 (predicted)	GO:0016072	rRNA metabolic process	BP	1	0.313646	1	5.21012	curated	FALSE	TRUE	FALSE
SPAC1486.09	ribosome biogenesis protein Nob1 (predicted)	GO:0034660	ncRNA metabolic process	BP	1	0.558045	1	4.55334	curated	FALSE	TRUE	FALSE
SPBC1289.16c	copper amine oxidase-like protein Cao2	GO:0030003	cellular cation homeostasis	BP	1	0.107943	1	6.16742		FALSE	TRUE	FALSE
SPBC1289.16c	copper amine oxidase-like protein Cao2	GO:0055080	cation homeostasis	BP	1	0.10387	1	6.08917		FALSE	TRUE	FALSE
SPBC1289.16c	copper amine oxidase-like protein Cao2	GO:0009056	catabolic process	BP	1	0.179226	1	4.05509		FALSE	TRUE	FALSE
SPBC1289.16c	copper amine oxidase-like protein Cao2	GO:1901575	organic substance catabolic process	BP	1	0.215886	1	4.16657		FALSE	TRUE	FALSE
SPBC1289.16c	copper amine oxidase-like protein Cao2	GO:1901565	organonitrogen compound catabolic process	BP	1	0.12831	1	5.06108		FALSE	TRUE	FALSE
SPBC1347.02	CENP-A amino terminus domain (NTD) isomerase Ani1	GO:0050794	regulation of cellular process	BP	1	0.156823	1	2.8982		FALSE	FALSE	FALSE
SPAC343.03	anaphase-promoting complex ubiquitin -protein ligase E3 subunit Apc11	GO:0043161	proteasome-mediated ubiquitin-dependent protein catabolic process	BP	1	0.313646	1	5.4978	curated	FALSE	TRUE	FALSE
SPAC343.03	anaphase-promoting complex ubiquitin -protein ligase E3 subunit Apc11	GO:0022402	cell cycle process	BP	1	0.12831	1	3.7611	curated	FALSE	TRUE	FALSE
SPAC343.03	anaphase-promoting complex ubiquitin -protein ligase E3 subunit Apc11	GO:0022414	reproductive process	BP	1	0.105906	1	4.58151		FALSE	TRUE	FALSE
SPAC1039.08	serine acetyltransferase (predicted)	GO:1901575	organic substance catabolic process	BP	1	0.136456	1	4.16657		FALSE	FALSE	FALSE
SPAC1039.08	serine acetyltransferase (predicted)	GO:0009056	catabolic process	BP	1	0.118126	1	4.05509		FALSE	FALSE	FALSE
SPAC1039.08	serine acetyltransferase (predicted)	GO:0044248	cellular catabolic process	BP	1	0.101833	1	4.14326		FALSE	FALSE	FALSE
SPAC20G8.04c	mitochondrial electron transfer flavoprotein-ubiquinone oxidoreductase Cir2 (predicted)	GO:1901605	alpha-amino acid metabolic process	BP	1	0.126273	1	5.17073		FALSE	TRUE	FALSE
SPAC20G8.04c	mitochondrial electron transfer flavoprotein-ubiquinone oxidoreductase Cir2 (predicted)	GO:0044281	small molecule metabolic process	BP	1	0.578411	1	3.83054		FALSE	TRUE	FALSE
SPAC20G8.04c	mitochondrial electron transfer flavoprotein-ubiquinone oxidoreductase Cir2 (predicted)	GO:0043436	oxoacid metabolic process	BP	1	0.309572	1	4.4949		FALSE	TRUE	FALSE
SPAC20G8.04c	mitochondrial electron transfer flavoprotein-ubiquinone oxidoreductase Cir2 (predicted)	GO:0009056	catabolic process	BP	1	0.1222	1	4.05509		FALSE	TRUE	FALSE
SPAC20G8.04c	mitochondrial electron transfer flavoprotein-ubiquinone oxidoreductase Cir2 (predicted)	GO:0006082	organic acid metabolic process	BP	1	0.279022	1	4.49054		FALSE	TRUE	FALSE
SPAC20G8.04c	mitochondrial electron transfer flavoprotein-ubiquinone oxidoreductase Cir2 (predicted)	GO:0006520	cellular amino acid metabolic process	BP	1	0.130346	1	4.94844		FALSE	TRUE	FALSE
SPAC20G8.04c	mitochondrial electron transfer flavoprotein-ubiquinone oxidoreductase Cir2 (predicted)	GO:0019752	carboxylic acid metabolic process	BP	1	0.344196	1	4.5103		FALSE	TRUE	FALSE
SPAC19D5.05c	U3 snoRNP-associated protein Imp3 (predicted)	GO:0006364	rRNA processing	BP	1	0.120163	1	5.35391	curated	FALSE	TRUE	FALSE
SPAC19D5.05c	U3 snoRNP-associated protein Imp3 (predicted)	GO:0022613	ribonucleoprotein complex biogenesis	BP	1	0.217923	1	5.93042	curated	FALSE	TRUE	FALSE
SPAC19D5.05c	U3 snoRNP-associated protein Imp3 (predicted)	GO:0044085	cellular component biogenesis	BP	1	0.254582	1	5.63133	curated	FALSE	TRUE	FALSE
SPCC297.03	Ca2+/calmodulin-dependent (CaMMK)-like protein kinase Ssp1	GO:0006464	cellular protein modification process	BP	1	0.152749	1	4.25702		FALSE	TRUE	FALSE
SPCC297.03	Ca2+/calmodulin-dependent (CaMMK)-like protein kinase Ssp1	GO:0006793	phosphorus metabolic process	BP	1	0.118126	1	4.53955		FALSE	TRUE	FALSE
SPCC297.03	Ca2+/calmodulin-dependent (CaMMK)-like protein kinase Ssp1	GO:0036211	protein modification process	BP	1	0.187373	1	4.25702		FALSE	TRUE	FALSE
SPCC297.03	Ca2+/calmodulin-dependent (CaMMK)-like protein kinase Ssp1	GO:0006796	phosphate-containing compound metabolic process	BP	1	0.101833	1	4.57439		FALSE	TRUE	FALSE
SPCC297.03	Ca2+/calmodulin-dependent (CaMMK)-like protein kinase Ssp1	GO:0043412	macromolecule modification	BP	1	0.1222	1	4.03422		FALSE	TRUE	FALSE
SPCC297.03	Ca2+/calmodulin-dependent (CaMMK)-like protein kinase Ssp1	GO:0044267	cellular protein metabolic process	BP	1	0.199593	1	3.76847		FALSE	TRUE	FALSE
SPCC297.03	Ca2+/calmodulin-dependent (CaMMK)-like protein kinase Ssp1	GO:0019538	protein metabolic process	BP	1	0.191446	1	3.49327		FALSE	TRUE	FALSE
SPCC297.03	Ca2+/calmodulin-dependent (CaMMK)-like protein kinase Ssp1	GO:0016310	phosphorylation	BP	1	0.171079	1	5.97738		FALSE	TRUE	FALSE
SPAC31G5.08	uroporphyrinogen-III synthase Ups	GO:0051186	obsolete cofactor metabolic process	BP	1	0.112016	1	10.6218		FALSE	TRUE	FALSE
SPAC31G5.08	uroporphyrinogen-III synthase Ups	GO:0044271	cellular nitrogen compound biosynthetic process	BP	1	0.230143	1	3.90396	automatic	FALSE	TRUE	FALSE
SPAC31G5.08	uroporphyrinogen-III synthase Ups	GO:1901362	organic cyclic compound biosynthetic process	BP	1	0.205703	1	4.35078	automatic	FALSE	TRUE	FALSE
SPAC31G5.08	uroporphyrinogen-III synthase Ups	GO:0051188	obsolete cofactor biosynthetic process	BP	1	0.114053	1	10.6218		FALSE	TRUE	FALSE
SPAC31G5.08	uroporphyrinogen-III synthase Ups	GO:0018130	heterocycle biosynthetic process	BP	1	0.169043	1	4.44798	automatic	FALSE	TRUE	FALSE
SPAC31G5.08	uroporphyrinogen-III synthase Ups	GO:0019438	aromatic compound biosynthetic process	BP	1	0.177189	1	4.48404	automatic	FALSE	TRUE	FALSE
SPAC31G5.08	uroporphyrinogen-III synthase Ups	GO:1901566	organonitrogen compound biosynthetic process	BP	1	0.248473	1	3.94847	automatic	FALSE	TRUE	FALSE
SPAC1002.04c	transcription factor TFIID complex subunit Taf11 (predicted)	GO:0071824	protein-DNA complex subunit organization	BP	1	0.13442	1	5.89438		FALSE	TRUE	FALSE
SPAC1002.04c	transcription factor TFIID complex subunit Taf11 (predicted)	GO:0034622	cellular protein-containing complex assembly	BP	1	0.183299	1	5.05342		FALSE	TRUE	FALSE
SPAC1002.04c	transcription factor TFIID complex subunit Taf11 (predicted)	GO:0016043	cellular component organization	BP	1	0.456212	1	3.17343		FALSE	TRUE	FALSE
SPAC1002.04c	transcription factor TFIID complex subunit Taf11 (predicted)	GO:0022607	cellular component assembly	BP	1	0.189409	1	4.31549		FALSE	TRUE	FALSE
SPAC1002.04c	transcription factor TFIID complex subunit Taf11 (predicted)	GO:0065003	protein-containing complex assembly	BP	1	0.156823	1	5.03827		FALSE	TRUE	FALSE
SPAC1002.04c	transcription factor TFIID complex subunit Taf11 (predicted)	GO:0043933	protein-containing complex subunit organization	BP	1	0.11609	1	4.76383		FALSE	TRUE	FALSE
SPBC1773.09c	DNAJ domain protein, exocytosis associated Mug184 (predicted)	GO:0006996	organelle organization	BP	1	0.276986	1	4.03836		FALSE	TRUE	FALSE
SPBC1773.09c	DNAJ domain protein, exocytosis associated Mug184 (predicted)	GO:0016043	cellular component organization	BP	1	0.291242	1	3.17343		FALSE	TRUE	FALSE
SPBC1773.09c	DNAJ domain protein, exocytosis associated Mug184 (predicted)	GO:0022411	cellular component disassembly	BP	1	0.101833	1	6.49463		FALSE	TRUE	FALSE
SPBC1773.09c	DNAJ domain protein, exocytosis associated Mug184 (predicted)	GO:0050794	regulation of cellular process	BP	1	0.181263	1	2.8982		FALSE	TRUE	FALSE
SPBC1773.09c	DNAJ domain protein, exocytosis associated Mug184 (predicted)	GO:0022402	cell cycle process	BP	1	0.107943	1	3.7611		FALSE	TRUE	FALSE
SPBC1773.09c	DNAJ domain protein, exocytosis associated Mug184 (predicted)	GO:0046907	intracellular transport	BP	1	0.162933	1	4.17446		FALSE	TRUE	FALSE
SPBC1773.09c	DNAJ domain protein, exocytosis associated Mug184 (predicted)	GO:0022607	cellular component assembly	BP	1	0.118126	1	4.31549		FALSE	TRUE	FALSE
SPBC3F6.05	RhoGAP, GTPase activating protein Rga1	GO:0008360	regulation of cell shape	BP	1	0.10998	1	6.04706	experimental	FALSE	FALSE	FALSE
SPBC3F6.05	RhoGAP, GTPase activating protein Rga1	GO:0030036	actin cytoskeleton organization	BP	1	0.158859	1	6.05742	experimental	FALSE	FALSE	FALSE
SPBC1289.02c	U2 snRNP-associated protein Uap2	GO:0060255	regulation of macromolecule metabolic process	BP	1	0.124236	1	3.55445		FALSE	TRUE	FALSE
SPBC1289.02c	U2 snRNP-associated protein Uap2	GO:0019222	regulation of metabolic process	BP	1	0.160896	1	3.51189		FALSE	TRUE	FALSE
SPCC74.09	RNA-binding protein, rrm type	GO:2000241	regulation of reproductive process	BP	1	0.142566	1	5.1453		FALSE	FALSE	TRUE
SPCC74.09	RNA-binding protein, rrm type	GO:0009892	negative regulation of metabolic process	BP	1	0.317719	1	4.36986		FALSE	FALSE	TRUE
SPCC74.09	RNA-binding protein, rrm type	GO:0046999	regulation of conjugation	BP	1	0.105906	1	5.87683		FALSE	FALSE	TRUE
SPCC74.09	RNA-binding protein, rrm type	GO:0006355	regulation of transcription, DNA-templated	BP	1	0.160896	1	4.19205		FALSE	FALSE	TRUE
SPCC74.09	RNA-binding protein, rrm type	GO:1903506	regulation of nucleic acid-templated transcription	BP	1	0.126273	1	4.18242		FALSE	FALSE	TRUE
SPCC74.09	RNA-binding protein, rrm type	GO:2000113	negative regulation of cellular macromolecule biosynthetic process	BP	1	0.156823	1	5.10834		FALSE	FALSE	TRUE
SPCC74.09	RNA-binding protein, rrm type	GO:0048519	negative regulation of biological process	BP	1	0.321792	1	3.83054		FALSE	FALSE	TRUE
SPCC74.09	RNA-binding protein, rrm type	GO:0031324	negative regulation of cellular metabolic process	BP	1	0.244399	1	4.84721		FALSE	FALSE	TRUE
SPCC74.09	RNA-binding protein, rrm type	GO:0051172	negative regulation of nitrogen compound metabolic process	BP	1	0.285132	1	5.01229		FALSE	FALSE	TRUE
SPCC74.09	RNA-binding protein, rrm type	GO:0060255	regulation of macromolecule metabolic process	BP	1	0.236253	1	3.55445		FALSE	FALSE	TRUE
SPCC74.09	RNA-binding protein, rrm type	GO:0031323	regulation of cellular metabolic process	BP	1	0.325866	1	3.69519		FALSE	FALSE	TRUE
SPCC74.09	RNA-binding protein, rrm type	GO:0010468	regulation of gene expression	BP	1	0.248473	1	3.8283		FALSE	FALSE	TRUE
SPCC74.09	RNA-binding protein, rrm type	GO:0031137	regulation of conjugation with cellular fusion	BP	1	0.142566	1	5.87683		FALSE	FALSE	TRUE
SPCC74.09	RNA-binding protein, rrm type	GO:0051253	negative regulation of RNA metabolic process	BP	1	0.230143	1	5.38002		FALSE	FALSE	TRUE
SPCC74.09	RNA-binding protein, rrm type	GO:0048523	negative regulation of cellular process	BP	1	0.276986	1	4.08943		FALSE	FALSE	TRUE
SPCC74.09	RNA-binding protein, rrm type	GO:0051252	regulation of RNA metabolic process	BP	1	0.152749	1	4.14479		FALSE	FALSE	TRUE
SPCC74.09	RNA-binding protein, rrm type	GO:2000242	negative regulation of reproductive process	BP	1	0.11609	1	6.22732		FALSE	FALSE	TRUE
SPCC74.09	RNA-binding protein, rrm type	GO:0051171	regulation of nitrogen compound metabolic process	BP	1	0.252546	1	3.77908		FALSE	FALSE	TRUE
SPCC74.09	RNA-binding protein, rrm type	GO:0043900	regulation of multi-organism process	BP	1	0.14664	1	5.60449		FALSE	FALSE	TRUE
SPCC74.09	RNA-binding protein, rrm type	GO:0045934	negative regulation of nucleobase-containing compound metabolic process	BP	1	0.164969	1	5.21459		FALSE	FALSE	TRUE
SPCC74.09	RNA-binding protein, rrm type	GO:0019222	regulation of metabolic process	BP	1	0.164969	1	3.51189		FALSE	FALSE	TRUE
SPCC74.09	RNA-binding protein, rrm type	GO:1903507	negative regulation of nucleic acid-templated transcription	BP	1	0.10387	1	5.42327		FALSE	FALSE	TRUE
SPCC74.09	RNA-binding protein, rrm type	GO:0050794	regulation of cellular process	BP	1	0.272912	1	2.8982		FALSE	FALSE	TRUE
SPCC74.09	RNA-binding protein, rrm type	GO:0031327	negative regulation of cellular biosynthetic process	BP	1	0.142566	1	5.04204		FALSE	FALSE	TRUE
SPCC74.09	RNA-binding protein, rrm type	GO:2000112	regulation of cellular macromolecule biosynthetic process	BP	1	0.1222	1	3.96376		FALSE	FALSE	TRUE
SPCC74.09	RNA-binding protein, rrm type	GO:0080090	regulation of primary metabolic process	BP	1	0.171079	1	3.74241		FALSE	FALSE	TRUE
SPCC74.09	RNA-binding protein, rrm type	GO:0010556	regulation of macromolecule biosynthetic process	BP	1	0.177189	1	3.95481		FALSE	FALSE	TRUE
SPCC74.09	RNA-binding protein, rrm type	GO:0019219	regulation of nucleobase-containing compound metabolic process	BP	1	0.217923	1	3.97408		FALSE	FALSE	TRUE
SPCC74.09	RNA-binding protein, rrm type	GO:0010558	negative regulation of macromolecule biosynthetic process	BP	1	0.130346	1	5.10834		FALSE	FALSE	TRUE
SPCC74.09	RNA-binding protein, rrm type	GO:0010605	negative regulation of macromolecule metabolic process	BP	1	0.285132	1	4.41117		FALSE	FALSE	TRUE
SPCC74.09	RNA-binding protein, rrm type	GO:0031326	regulation of cellular biosynthetic process	BP	1	0.191446	1	3.91981		FALSE	FALSE	TRUE
SPBC12D12.06	mediator complex cyclin subunit Srb11	GO:0043900	regulation of multi-organism process	BP	1	0.107943	1	5.60449		FALSE	TRUE	FALSE
SPAC12G12.06c	rRNA processing protein Rcl1 (predicted)	GO:0090305	nucleic acid phosphodiester bond hydrolysis	BP	1	0.105906	1	5.88557		FALSE	TRUE	FALSE
SPAC12G12.06c	rRNA processing protein Rcl1 (predicted)	GO:0006364	rRNA processing	BP	1	0.321792	1	5.35391	curated	FALSE	TRUE	FALSE
SPBC1861.07	elongin C (predicted)	GO:0050896	response to stimulus	BP	1	0.132383	1	4.04113		FALSE	TRUE	FALSE
SPBC1861.07	elongin C (predicted)	GO:0033554	cellular response to stress	BP	1	0.10998	1	4.13866		FALSE	TRUE	FALSE
SPBC1861.07	elongin C (predicted)	GO:0090304	nucleic acid metabolic process	BP	1	0.183299	1	3.20299	curated	FALSE	TRUE	FALSE
SPBC1861.07	elongin C (predicted)	GO:0051716	cellular response to stimulus	BP	1	0.10387	1	4.04948		FALSE	TRUE	FALSE
SPBC1861.07	elongin C (predicted)	GO:0006511	ubiquitin-dependent protein catabolic process	BP	1	0.130346	1	5.25113	automatic	FALSE	TRUE	FALSE
SPBC1861.07	elongin C (predicted)	GO:1901575	organic substance catabolic process	BP	1	0.142566	1	4.16657	automatic	FALSE	TRUE	FALSE
SPBC1861.07	elongin C (predicted)	GO:0043632	modification-dependent macromolecule catabolic process	BP	1	0.162933	1	5.05725	automatic	FALSE	TRUE	FALSE
SPBC1861.07	elongin C (predicted)	GO:0051603	proteolysis involved in cellular protein catabolic process	BP	1	0.136456	1	5.17073	automatic	FALSE	TRUE	FALSE
SPBC1861.07	elongin C (predicted)	GO:0006508	proteolysis	BP	1	0.171079	1	4.78112	automatic	FALSE	TRUE	FALSE
SPBC1861.07	elongin C (predicted)	GO:0044248	cellular catabolic process	BP	1	0.181263	1	4.14326	automatic	FALSE	TRUE	FALSE
SPBC1861.07	elongin C (predicted)	GO:0044265	cellular macromolecule catabolic process	BP	1	0.158859	1	4.54183	automatic	FALSE	TRUE	FALSE
SPBC1861.07	elongin C (predicted)	GO:0009056	catabolic process	BP	1	0.193483	1	4.05509	automatic	FALSE	TRUE	FALSE
SPBC1861.07	elongin C (predicted)	GO:0019538	protein metabolic process	BP	1	0.287169	1	3.49327	automatic	FALSE	TRUE	FALSE
SPBC1861.07	elongin C (predicted)	GO:0019941	modification-dependent protein catabolic process	BP	1	0.138493	1	5.24649	automatic	FALSE	TRUE	FALSE
SPBC1861.07	elongin C (predicted)	GO:0009057	macromolecule catabolic process	BP	1	0.175153	1	4.49272	automatic	FALSE	TRUE	FALSE
SPAC24B11.13	hydroxymethylbilane synthase Hem3 (predicted)	GO:0044271	cellular nitrogen compound biosynthetic process	BP	1	0.209776	1	3.90396	automatic	FALSE	TRUE	FALSE
SPAC24B11.13	hydroxymethylbilane synthase Hem3 (predicted)	GO:1901362	organic cyclic compound biosynthetic process	BP	1	0.185336	1	4.35078	automatic	FALSE	TRUE	FALSE
SPAC24B11.13	hydroxymethylbilane synthase Hem3 (predicted)	GO:0018130	heterocycle biosynthetic process	BP	1	0.14053	1	4.44798	automatic	FALSE	TRUE	FALSE
SPAC24B11.13	hydroxymethylbilane synthase Hem3 (predicted)	GO:0019438	aromatic compound biosynthetic process	BP	1	0.10998	1	4.48404	automatic	FALSE	TRUE	FALSE
SPAC24B11.13	hydroxymethylbilane synthase Hem3 (predicted)	GO:1901566	organonitrogen compound biosynthetic process	BP	1	0.228106	1	3.94847	automatic	FALSE	TRUE	FALSE
SPAC27F1.06c	CENP-A amino terminus domain (NTD) isomerase Ani2	GO:0050794	regulation of cellular process	BP	1	0.114053	1	2.8982		FALSE	FALSE	FALSE
SPCC965.10	transcription factor (predicted)	GO:0051252	regulation of RNA metabolic process	BP	1	0.132383	1	4.14479		FALSE	FALSE	FALSE
SPCC965.10	transcription factor (predicted)	GO:0006355	regulation of transcription, DNA-templated	BP	1	0.112016	1	4.19205		FALSE	FALSE	FALSE
SPCC965.10	transcription factor (predicted)	GO:1903506	regulation of nucleic acid-templated transcription	BP	1	0.144603	1	4.18242		FALSE	FALSE	FALSE
SPCC965.10	transcription factor (predicted)	GO:0051171	regulation of nitrogen compound metabolic process	BP	1	0.162933	1	3.77908		FALSE	FALSE	FALSE
SPCC965.10	transcription factor (predicted)	GO:0010468	regulation of gene expression	BP	1	0.152749	1	3.8283		FALSE	FALSE	FALSE
SPCC965.10	transcription factor (predicted)	GO:2001141	regulation of RNA biosynthetic process	BP	1	0.11609	1	4.18082		FALSE	FALSE	FALSE
SPCC965.10	transcription factor (predicted)	GO:0019222	regulation of metabolic process	BP	1	0.177189	1	3.51189		FALSE	FALSE	FALSE
SPCC965.10	transcription factor (predicted)	GO:0050794	regulation of cellular process	BP	1	0.246436	1	2.8982		FALSE	FALSE	FALSE
SPCC965.10	transcription factor (predicted)	GO:0060255	regulation of macromolecule metabolic process	BP	1	0.203666	1	3.55445		FALSE	FALSE	FALSE
SPCC965.10	transcription factor (predicted)	GO:2000112	regulation of cellular macromolecule biosynthetic process	BP	1	0.158859	1	3.96376		FALSE	FALSE	FALSE
SPCC965.10	transcription factor (predicted)	GO:0080090	regulation of primary metabolic process	BP	1	0.177189	1	3.74241		FALSE	FALSE	FALSE
SPCC965.10	transcription factor (predicted)	GO:0010556	regulation of macromolecule biosynthetic process	BP	1	0.169043	1	3.95481		FALSE	FALSE	FALSE
SPCC965.10	transcription factor (predicted)	GO:0031323	regulation of cellular metabolic process	BP	1	0.177189	1	3.69519		FALSE	FALSE	FALSE
SPCC965.10	transcription factor (predicted)	GO:0009889	regulation of biosynthetic process	BP	1	0.160896	1	3.91981		FALSE	FALSE	FALSE
SPCC965.10	transcription factor (predicted)	GO:0019219	regulation of nucleobase-containing compound metabolic process	BP	1	0.171079	1	3.97408		FALSE	FALSE	FALSE
SPCC965.10	transcription factor (predicted)	GO:0031326	regulation of cellular biosynthetic process	BP	1	0.160896	1	3.91981		FALSE	FALSE	FALSE
SPAC1B3.02c	transcription elongation factor, Elf1 family (predicted)	GO:0006355	regulation of transcription, DNA-templated	BP	1	0.10387	1	4.19205		FALSE	TRUE	FALSE
SPAC1B3.02c	transcription elongation factor, Elf1 family (predicted)	GO:1903506	regulation of nucleic acid-templated transcription	BP	1	0.11609	1	4.18242		FALSE	TRUE	FALSE
SPAC1B3.02c	transcription elongation factor, Elf1 family (predicted)	GO:0060255	regulation of macromolecule metabolic process	BP	1	0.142566	1	3.55445		FALSE	TRUE	FALSE
SPAC1B3.02c	transcription elongation factor, Elf1 family (predicted)	GO:0016043	cellular component organization	BP	1	0.171079	1	3.17343		FALSE	TRUE	FALSE
SPAC1B3.02c	transcription elongation factor, Elf1 family (predicted)	GO:0031323	regulation of cellular metabolic process	BP	1	0.12831	1	3.69519		FALSE	TRUE	FALSE
SPAC1B3.02c	transcription elongation factor, Elf1 family (predicted)	GO:0010468	regulation of gene expression	BP	1	0.162933	1	3.8283		FALSE	TRUE	FALSE
SPAC1B3.02c	transcription elongation factor, Elf1 family (predicted)	GO:0051171	regulation of nitrogen compound metabolic process	BP	1	0.12831	1	3.77908		FALSE	TRUE	FALSE
SPAC1B3.02c	transcription elongation factor, Elf1 family (predicted)	GO:2001141	regulation of RNA biosynthetic process	BP	1	0.114053	1	4.18082		FALSE	TRUE	FALSE
SPAC1B3.02c	transcription elongation factor, Elf1 family (predicted)	GO:0019222	regulation of metabolic process	BP	1	0.14664	1	3.51189		FALSE	TRUE	FALSE
SPAC1B3.02c	transcription elongation factor, Elf1 family (predicted)	GO:0050794	regulation of cellular process	BP	1	0.152749	1	2.8982		FALSE	TRUE	FALSE
SPAC1B3.02c	transcription elongation factor, Elf1 family (predicted)	GO:2000112	regulation of cellular macromolecule biosynthetic process	BP	1	0.10387	1	3.96376		FALSE	TRUE	FALSE
SPAC1B3.02c	transcription elongation factor, Elf1 family (predicted)	GO:0080090	regulation of primary metabolic process	BP	1	0.126273	1	3.74241		FALSE	TRUE	FALSE
SPAC1B3.02c	transcription elongation factor, Elf1 family (predicted)	GO:0010556	regulation of macromolecule biosynthetic process	BP	1	0.136456	1	3.95481		FALSE	TRUE	FALSE
SPAC1B3.02c	transcription elongation factor, Elf1 family (predicted)	GO:0009889	regulation of biosynthetic process	BP	1	0.10998	1	3.91981		FALSE	TRUE	FALSE
SPBC776.18c	transcription factor TFIIK complex ubiquitin-protein ligase E3 subunit, Pmh1	GO:0050794	regulation of cellular process	BP	1	0.299389	1	2.8982		FALSE	TRUE	FALSE
SPAC6F12.07	mitochondrial TOM complex subunit Tom20 (predicted)	GO:0016043	cellular component organization	BP	1	0.258656	1	3.17343	curated	FALSE	TRUE	FALSE
SPAC6F12.07	mitochondrial TOM complex subunit Tom20 (predicted)	GO:0043933	protein-containing complex subunit organization	BP	1	0.10387	1	4.76383	curated	FALSE	TRUE	FALSE
SPAC688.04c	glutathione S-transferase Gst3	GO:0019538	protein metabolic process	BP	1	0.177189	1	3.49327		FALSE	FALSE	FALSE
SPAC3C7.10	peroxin 13 (predicted)	GO:0008104	protein localization	BP	1	0.191446	1	4.14326	automatic	FALSE	TRUE	FALSE
SPAC3C7.10	peroxin 13 (predicted)	GO:0033036	macromolecule localization	BP	1	0.164969	1	4.13408	automatic	FALSE	TRUE	FALSE
SPAC3C7.10	peroxin 13 (predicted)	GO:0051179	localization	BP	1	0.274949	1	3.1988	automatic	FALSE	TRUE	FALSE
SPAC2C4.09	mitochondrial calcium uniporter regulator (predicted)	GO:0016043	cellular component organization	BP	1	0.258656	1	3.17343		FALSE	TRUE	FALSE
SPCC550.14	KH domain RNA binding protein, vigilin (predicted)	GO:0060255	regulation of macromolecule metabolic process	BP	1	0.130346	1	3.55445		FALSE	TRUE	FALSE
SPCC550.14	KH domain RNA binding protein, vigilin (predicted)	GO:0010608	posttranscriptional regulation of gene expression	BP	1	0.10387	1	6.43211		FALSE	TRUE	FALSE
SPCC550.14	KH domain RNA binding protein, vigilin (predicted)	GO:0010468	regulation of gene expression	BP	1	0.169043	1	3.8283		FALSE	TRUE	FALSE
SPCC550.14	KH domain RNA binding protein, vigilin (predicted)	GO:0051171	regulation of nitrogen compound metabolic process	BP	1	0.105906	1	3.77908		FALSE	TRUE	FALSE
SPCC550.14	KH domain RNA binding protein, vigilin (predicted)	GO:0019222	regulation of metabolic process	BP	1	0.148676	1	3.51189		FALSE	TRUE	FALSE
SPCC550.14	KH domain RNA binding protein, vigilin (predicted)	GO:0050794	regulation of cellular process	BP	1	0.201629	1	2.8982		FALSE	TRUE	FALSE
SPCC550.14	KH domain RNA binding protein, vigilin (predicted)	GO:0016043	cellular component organization	BP	1	0.187373	1	3.17343		FALSE	TRUE	FALSE
SPBC32F12.15	transcription factor TFIIH complex subunit Tfb5 (predicted)	GO:0006464	cellular protein modification process	BP	1	0.105906	1	4.25702		FALSE	TRUE	FALSE
SPBC32F12.15	transcription factor TFIIH complex subunit Tfb5 (predicted)	GO:0043412	macromolecule modification	BP	1	0.142566	1	4.03422		FALSE	TRUE	FALSE
SPBC32F12.15	transcription factor TFIIH complex subunit Tfb5 (predicted)	GO:0019538	protein metabolic process	BP	1	0.148676	1	3.49327		FALSE	TRUE	FALSE
SPBC32F12.15	transcription factor TFIIH complex subunit Tfb5 (predicted)	GO:0060255	regulation of macromolecule metabolic process	BP	1	0.160896	1	3.55445	automatic	FALSE	TRUE	FALSE
SPBC32F12.15	transcription factor TFIIH complex subunit Tfb5 (predicted)	GO:0031323	regulation of cellular metabolic process	BP	1	0.158859	1	3.69519	automatic	FALSE	TRUE	FALSE
SPBC32F12.15	transcription factor TFIIH complex subunit Tfb5 (predicted)	GO:0051171	regulation of nitrogen compound metabolic process	BP	1	0.164969	1	3.77908	automatic	FALSE	TRUE	FALSE
SPBC32F12.15	transcription factor TFIIH complex subunit Tfb5 (predicted)	GO:0044267	cellular protein metabolic process	BP	1	0.10387	1	3.76847		FALSE	TRUE	FALSE
SPBC32F12.15	transcription factor TFIIH complex subunit Tfb5 (predicted)	GO:2001141	regulation of RNA biosynthetic process	BP	1	0.11609	1	4.18082	automatic	FALSE	TRUE	FALSE
SPBC32F12.15	transcription factor TFIIH complex subunit Tfb5 (predicted)	GO:0019222	regulation of metabolic process	BP	1	0.177189	1	3.51189	automatic	FALSE	TRUE	FALSE
SPBC32F12.15	transcription factor TFIIH complex subunit Tfb5 (predicted)	GO:0050794	regulation of cellular process	BP	1	0.327902	1	2.8982	automatic	FALSE	TRUE	FALSE
SPBC32F12.15	transcription factor TFIIH complex subunit Tfb5 (predicted)	GO:2000112	regulation of cellular macromolecule biosynthetic process	BP	1	0.114053	1	3.96376	automatic	FALSE	TRUE	FALSE
SPBC32F12.15	transcription factor TFIIH complex subunit Tfb5 (predicted)	GO:0080090	regulation of primary metabolic process	BP	1	0.142566	1	3.74241	automatic	FALSE	TRUE	FALSE
SPBC32F12.15	transcription factor TFIIH complex subunit Tfb5 (predicted)	GO:0010556	regulation of macromolecule biosynthetic process	BP	1	0.13442	1	3.95481	automatic	FALSE	TRUE	FALSE
SPBC32F12.15	transcription factor TFIIH complex subunit Tfb5 (predicted)	GO:0009889	regulation of biosynthetic process	BP	1	0.144603	1	3.91981	automatic	FALSE	TRUE	FALSE
SPBC32F12.15	transcription factor TFIIH complex subunit Tfb5 (predicted)	GO:0019219	regulation of nucleobase-containing compound metabolic process	BP	1	0.156823	1	3.97408	automatic	FALSE	TRUE	FALSE
SPBC32F12.15	transcription factor TFIIH complex subunit Tfb5 (predicted)	GO:0031326	regulation of cellular biosynthetic process	BP	1	0.152749	1	3.91981	automatic	FALSE	TRUE	FALSE
SPBC13G1.13	transcription factor TFIIH complex subunit Tfb2	GO:0034645	cellular macromolecule biosynthetic process	BP	1	0.101833	1	4.06357	curated	FALSE	TRUE	FALSE
SPBC800.12c	ubiquitin family protein (predicted)	GO:0090304	nucleic acid metabolic process	BP	1	0.112016	1	3.20299		FALSE	FALSE	FALSE
SPAC16A10.07c	shelterin complex subunit Taz1	GO:0034613	cellular protein localization	BP	1	0.152749	1	4.47758	experimental	FALSE	TRUE	FALSE
SPBC8D2.16c	SPOUT domain containing methyltransferase (predicted)	GO:0006396	RNA processing	BP	1	0.289206	1	4.40317		FALSE	TRUE	FALSE
SPBC8D2.16c	SPOUT domain containing methyltransferase (predicted)	GO:0016070	RNA metabolic process	BP	1	0.331976	1	3.70307		FALSE	TRUE	FALSE
SPBC8D2.16c	SPOUT domain containing methyltransferase (predicted)	GO:0090304	nucleic acid metabolic process	BP	1	0.370672	1	3.20299		FALSE	TRUE	FALSE
SPCC757.04	transcription factor (predicted)	GO:0006355	regulation of transcription, DNA-templated	BP	1	0.260692	1	4.19205		FALSE	FALSE	FALSE
SPCC757.04	transcription factor (predicted)	GO:0051252	regulation of RNA metabolic process	BP	1	0.283096	1	4.14479		FALSE	FALSE	FALSE
SPCC757.04	transcription factor (predicted)	GO:1903506	regulation of nucleic acid-templated transcription	BP	1	0.378819	1	4.18242		FALSE	FALSE	FALSE
SPCC757.04	transcription factor (predicted)	GO:0019219	regulation of nucleobase-containing compound metabolic process	BP	1	0.336049	1	3.97408		FALSE	FALSE	FALSE
SPCC757.04	transcription factor (predicted)	GO:0051171	regulation of nitrogen compound metabolic process	BP	1	0.315682	1	3.77908		FALSE	FALSE	FALSE
SPCC757.04	transcription factor (predicted)	GO:2001141	regulation of RNA biosynthetic process	BP	1	0.283096	1	4.18082		FALSE	FALSE	FALSE
SPCC757.04	transcription factor (predicted)	GO:0019222	regulation of metabolic process	BP	1	0.307536	1	3.51189		FALSE	FALSE	FALSE
SPCC757.04	transcription factor (predicted)	GO:0050794	regulation of cellular process	BP	1	0.374745	1	2.8982		FALSE	FALSE	FALSE
SPCC757.04	transcription factor (predicted)	GO:0060255	regulation of macromolecule metabolic process	BP	1	0.293279	1	3.55445		FALSE	FALSE	FALSE
SPCC757.04	transcription factor (predicted)	GO:0009889	regulation of biosynthetic process	BP	1	0.279022	1	3.91981		FALSE	FALSE	FALSE
SPCC757.04	transcription factor (predicted)	GO:2000112	regulation of cellular macromolecule biosynthetic process	BP	1	0.289206	1	3.96376		FALSE	FALSE	FALSE
SPCC757.04	transcription factor (predicted)	GO:0080090	regulation of primary metabolic process	BP	1	0.254582	1	3.74241		FALSE	FALSE	FALSE
SPCC757.04	transcription factor (predicted)	GO:0010556	regulation of macromolecule biosynthetic process	BP	1	0.228106	1	3.95481		FALSE	FALSE	FALSE
SPCC757.04	transcription factor (predicted)	GO:0031323	regulation of cellular metabolic process	BP	1	0.336049	1	3.69519		FALSE	FALSE	FALSE
SPCC757.04	transcription factor (predicted)	GO:0010468	regulation of gene expression	BP	1	0.272912	1	3.8283		FALSE	FALSE	FALSE
SPCC757.04	transcription factor (predicted)	GO:0031326	regulation of cellular biosynthetic process	BP	1	0.301426	1	3.91981		FALSE	FALSE	FALSE
SPBP35G2.09	U1 snRNP-associated protein Usp103	GO:0000398	mRNA splicing, via spliceosome	BP	1	0.551935	1	5.91224	curated	FALSE	TRUE	FALSE
SPBP35G2.09	U1 snRNP-associated protein Usp103	GO:0006396	RNA processing	BP	1	0.525458	1	4.40317	curated	FALSE	TRUE	FALSE
SPBP35G2.09	U1 snRNP-associated protein Usp103	GO:0006397	mRNA processing	BP	1	0.511202	1	5.63816	curated	FALSE	TRUE	FALSE
SPBP35G2.09	U1 snRNP-associated protein Usp103	GO:0000377	RNA splicing, via transesterification reactions with bulged adenosine as nucleophile	BP	1	0.545825	1	5.91224	curated	FALSE	TRUE	FALSE
SPBP35G2.09	U1 snRNP-associated protein Usp103	GO:0016071	mRNA metabolic process	BP	1	0.617108	1	4.88519	curated	FALSE	TRUE	FALSE
SPBP35G2.09	U1 snRNP-associated protein Usp103	GO:0016070	RNA metabolic process	BP	1	0.509165	1	3.70307	curated	FALSE	TRUE	FALSE
SPBP35G2.09	U1 snRNP-associated protein Usp103	GO:0008380	RNA splicing	BP	1	0.503055	1	5.87683	curated	FALSE	TRUE	FALSE
SPBP35G2.09	U1 snRNP-associated protein Usp103	GO:0090304	nucleic acid metabolic process	BP	1	0.533605	1	3.20299	curated	FALSE	TRUE	FALSE
SPBP35G2.09	U1 snRNP-associated protein Usp103	GO:0000375	RNA splicing, via transesterification reactions	BP	1	0.519348	1	5.89438	curated	FALSE	TRUE	FALSE
SPCC1494.02c	transcription factor TFIID complex subunit Taf13 (predicted)	GO:0034622	cellular protein-containing complex assembly	BP	1	0.132383	1	5.05342		FALSE	TRUE	FALSE
SPCC1494.02c	transcription factor TFIID complex subunit Taf13 (predicted)	GO:0016043	cellular component organization	BP	1	0.372709	1	3.17343		FALSE	TRUE	FALSE
SPCC1494.02c	transcription factor TFIID complex subunit Taf13 (predicted)	GO:0022607	cellular component assembly	BP	1	0.114053	1	4.31549		FALSE	TRUE	FALSE
SPCC1494.02c	transcription factor TFIID complex subunit Taf13 (predicted)	GO:0065003	protein-containing complex assembly	BP	1	0.10387	1	5.03827		FALSE	TRUE	FALSE
SPCC1494.02c	transcription factor TFIID complex subunit Taf13 (predicted)	GO:0043933	protein-containing complex subunit organization	BP	1	0.156823	1	4.76383		FALSE	TRUE	FALSE
SPAC4A8.16c	translation initiation factor eIF3c	GO:0044267	cellular protein metabolic process	BP	1	0.175153	1	3.76847	curated	FALSE	TRUE	FALSE
SPAC4A8.16c	translation initiation factor eIF3c	GO:0019538	protein metabolic process	BP	1	0.217923	1	3.49327	curated	FALSE	TRUE	FALSE
SPBC530.08	membrane-tethered transcription factor (predicted)	GO:0006355	regulation of transcription, DNA-templated	BP	1	0.283096	1	4.19205		FALSE	FALSE	FALSE
SPBC530.08	membrane-tethered transcription factor (predicted)	GO:0051252	regulation of RNA metabolic process	BP	1	0.307536	1	4.14479		FALSE	FALSE	FALSE
SPBC530.08	membrane-tethered transcription factor (predicted)	GO:1903506	regulation of nucleic acid-templated transcription	BP	1	0.232179	1	4.18242		FALSE	FALSE	FALSE
SPBC530.08	membrane-tethered transcription factor (predicted)	GO:0019219	regulation of nucleobase-containing compound metabolic process	BP	1	0.342159	1	3.97408		FALSE	FALSE	FALSE
SPBC530.08	membrane-tethered transcription factor (predicted)	GO:0051171	regulation of nitrogen compound metabolic process	BP	1	0.327902	1	3.77908		FALSE	FALSE	FALSE
SPBC530.08	membrane-tethered transcription factor (predicted)	GO:2001141	regulation of RNA biosynthetic process	BP	1	0.289206	1	4.18082		FALSE	FALSE	FALSE
SPBC530.08	membrane-tethered transcription factor (predicted)	GO:0019222	regulation of metabolic process	BP	1	0.338086	1	3.51189		FALSE	FALSE	FALSE
SPBC530.08	membrane-tethered transcription factor (predicted)	GO:0050794	regulation of cellular process	BP	1	0.362525	1	2.8982		FALSE	FALSE	FALSE
SPBC530.08	membrane-tethered transcription factor (predicted)	GO:0060255	regulation of macromolecule metabolic process	BP	1	0.291242	1	3.55445		FALSE	FALSE	FALSE
SPBC530.08	membrane-tethered transcription factor (predicted)	GO:0009889	regulation of biosynthetic process	BP	1	0.321792	1	3.91981		FALSE	FALSE	FALSE
SPBC530.08	membrane-tethered transcription factor (predicted)	GO:2000112	regulation of cellular macromolecule biosynthetic process	BP	1	0.358452	1	3.96376		FALSE	FALSE	FALSE
SPBC530.08	membrane-tethered transcription factor (predicted)	GO:0080090	regulation of primary metabolic process	BP	1	0.364562	1	3.74241		FALSE	FALSE	FALSE
SPBC530.08	membrane-tethered transcription factor (predicted)	GO:0010556	regulation of macromolecule biosynthetic process	BP	1	0.368635	1	3.95481		FALSE	FALSE	FALSE
SPBC530.08	membrane-tethered transcription factor (predicted)	GO:0031323	regulation of cellular metabolic process	BP	1	0.240326	1	3.69519		FALSE	FALSE	FALSE
SPBC530.08	membrane-tethered transcription factor (predicted)	GO:0010468	regulation of gene expression	BP	1	0.285132	1	3.8283		FALSE	FALSE	FALSE
SPBC530.08	membrane-tethered transcription factor (predicted)	GO:0031326	regulation of cellular biosynthetic process	BP	1	0.307536	1	3.91981		FALSE	FALSE	FALSE
SPCC338.12	vaculoar proteinase B inhibitor Pbi2	GO:0019222	regulation of metabolic process	BP	1	0.167006	1	3.51189		FALSE	TRUE	FALSE
SPCC338.12	vaculoar proteinase B inhibitor Pbi2	GO:0060255	regulation of macromolecule metabolic process	BP	1	0.150713	1	3.55445		FALSE	TRUE	FALSE
SPCC338.12	vaculoar proteinase B inhibitor Pbi2	GO:0080090	regulation of primary metabolic process	BP	1	0.11609	1	3.74241		FALSE	TRUE	FALSE
SPCC338.12	vaculoar proteinase B inhibitor Pbi2	GO:0051171	regulation of nitrogen compound metabolic process	BP	1	0.14664	1	3.77908		FALSE	TRUE	FALSE
SPCC777.02	transcription factor (predicted)	GO:0006355	regulation of transcription, DNA-templated	BP	1	0.321792	1	4.19205		FALSE	FALSE	FALSE
SPCC777.02	transcription factor (predicted)	GO:0051252	regulation of RNA metabolic process	BP	1	0.342159	1	4.14479		FALSE	FALSE	FALSE
SPCC777.02	transcription factor (predicted)	GO:1903506	regulation of nucleic acid-templated transcription	BP	1	0.386965	1	4.18242		FALSE	FALSE	FALSE
SPCC777.02	transcription factor (predicted)	GO:0019219	regulation of nucleobase-containing compound metabolic process	BP	1	0.374745	1	3.97408		FALSE	FALSE	FALSE
SPCC777.02	transcription factor (predicted)	GO:0051171	regulation of nitrogen compound metabolic process	BP	1	0.329939	1	3.77908		FALSE	FALSE	FALSE
SPCC777.02	transcription factor (predicted)	GO:2001141	regulation of RNA biosynthetic process	BP	1	0.313646	1	4.18082		FALSE	FALSE	FALSE
SPCC777.02	transcription factor (predicted)	GO:0019222	regulation of metabolic process	BP	1	0.346232	1	3.51189		FALSE	FALSE	FALSE
SPCC777.02	transcription factor (predicted)	GO:0050794	regulation of cellular process	BP	1	0.429735	1	2.8982		FALSE	FALSE	FALSE
SPCC777.02	transcription factor (predicted)	GO:0060255	regulation of macromolecule metabolic process	BP	1	0.354379	1	3.55445		FALSE	FALSE	FALSE
SPCC777.02	transcription factor (predicted)	GO:0009889	regulation of biosynthetic process	BP	1	0.264766	1	3.91981		FALSE	FALSE	FALSE
SPCC777.02	transcription factor (predicted)	GO:2000112	regulation of cellular macromolecule biosynthetic process	BP	1	0.305499	1	3.96376		FALSE	FALSE	FALSE
SPCC777.02	transcription factor (predicted)	GO:0080090	regulation of primary metabolic process	BP	1	0.303462	1	3.74241		FALSE	FALSE	FALSE
SPCC777.02	transcription factor (predicted)	GO:0010556	regulation of macromolecule biosynthetic process	BP	1	0.403259	1	3.95481		FALSE	FALSE	FALSE
SPCC777.02	transcription factor (predicted)	GO:0031323	regulation of cellular metabolic process	BP	1	0.362525	1	3.69519		FALSE	FALSE	FALSE
SPCC777.02	transcription factor (predicted)	GO:0010468	regulation of gene expression	BP	1	0.336049	1	3.8283		FALSE	FALSE	FALSE
SPCC777.02	transcription factor (predicted)	GO:0031326	regulation of cellular biosynthetic process	BP	1	0.272912	1	3.91981		FALSE	FALSE	FALSE
SPAC19G12.15c	trehalose-6-phosphate phosphatase Tpp1	GO:0003006	developmental process involved in reproduction	BP	1	0.112016	1	6.41707		FALSE	FALSE	FALSE
SPCC1682.01	ubiquinol-cytochrome-c reductase complex subunit 9 (predicted)	GO:0065003	protein-containing complex assembly	BP	1	0.10998	1	5.03827		FALSE	TRUE	FALSE
SPCC1682.01	ubiquinol-cytochrome-c reductase complex subunit 9 (predicted)	GO:0034622	cellular protein-containing complex assembly	BP	1	0.13442	1	5.05342		FALSE	TRUE	FALSE
SPCC1682.01	ubiquinol-cytochrome-c reductase complex subunit 9 (predicted)	GO:0016043	cellular component organization	BP	1	0.230143	1	3.17343		FALSE	TRUE	FALSE
SPAC3C7.04	transcription factor (predicted)	GO:0051252	regulation of RNA metabolic process	BP	1	0.185336	1	4.14479		FALSE	FALSE	FALSE
SPAC3C7.04	transcription factor (predicted)	GO:0006355	regulation of transcription, DNA-templated	BP	1	0.175153	1	4.19205		FALSE	FALSE	FALSE
SPAC3C7.04	transcription factor (predicted)	GO:1903506	regulation of nucleic acid-templated transcription	BP	1	0.213849	1	4.18242		FALSE	FALSE	FALSE
SPAC3C7.04	transcription factor (predicted)	GO:0051171	regulation of nitrogen compound metabolic process	BP	1	0.203666	1	3.77908		FALSE	FALSE	FALSE
SPAC3C7.04	transcription factor (predicted)	GO:0010468	regulation of gene expression	BP	1	0.215886	1	3.8283		FALSE	FALSE	FALSE
SPAC3C7.04	transcription factor (predicted)	GO:2001141	regulation of RNA biosynthetic process	BP	1	0.203666	1	4.18082		FALSE	FALSE	FALSE
SPAC3C7.04	transcription factor (predicted)	GO:0019222	regulation of metabolic process	BP	1	0.272912	1	3.51189		FALSE	FALSE	FALSE
SPAC3C7.04	transcription factor (predicted)	GO:0050794	regulation of cellular process	BP	1	0.285132	1	2.8982		FALSE	FALSE	FALSE
SPAC3C7.04	transcription factor (predicted)	GO:0060255	regulation of macromolecule metabolic process	BP	1	0.181263	1	3.55445		FALSE	FALSE	FALSE
SPAC3C7.04	transcription factor (predicted)	GO:2000112	regulation of cellular macromolecule biosynthetic process	BP	1	0.207739	1	3.96376		FALSE	FALSE	FALSE
SPAC3C7.04	transcription factor (predicted)	GO:0080090	regulation of primary metabolic process	BP	1	0.185336	1	3.74241		FALSE	FALSE	FALSE
SPAC3C7.04	transcription factor (predicted)	GO:0010556	regulation of macromolecule biosynthetic process	BP	1	0.252546	1	3.95481		FALSE	FALSE	FALSE
SPAC3C7.04	transcription factor (predicted)	GO:0031323	regulation of cellular metabolic process	BP	1	0.205703	1	3.69519		FALSE	FALSE	FALSE
SPAC3C7.04	transcription factor (predicted)	GO:0009889	regulation of biosynthetic process	BP	1	0.221996	1	3.91981		FALSE	FALSE	FALSE
SPAC3C7.04	transcription factor (predicted)	GO:0019219	regulation of nucleobase-containing compound metabolic process	BP	1	0.14053	1	3.97408		FALSE	FALSE	FALSE
SPAC3C7.04	transcription factor (predicted)	GO:0031326	regulation of cellular biosynthetic process	BP	1	0.228106	1	3.91981		FALSE	FALSE	FALSE
SPAC4C5.01	pseudouridine-5'-phosphatase (predicted)	GO:0005975	carbohydrate metabolic process	BP	1	0.118126	1	5.57191		FALSE	TRUE	FALSE
SPAC4C5.01	pseudouridine-5'-phosphatase (predicted)	GO:0006796	phosphate-containing compound metabolic process	BP	1	0.112016	1	4.57439		FALSE	TRUE	FALSE
SPAC4C5.01	pseudouridine-5'-phosphatase (predicted)	GO:0006793	phosphorus metabolic process	BP	1	0.14053	1	4.53955		FALSE	TRUE	FALSE
SPBC543.05c	plasma membrane borate efflux transmembrane transporter Bor1 (predicted)	GO:0045184	establishment of protein localization	BP	1	0.10387	1	4.68952		FALSE	TRUE	FALSE
SPBC543.05c	plasma membrane borate efflux transmembrane transporter Bor1 (predicted)	GO:0051641	cellular localization	BP	1	0.162933	1	3.67383		FALSE	TRUE	FALSE
SPBC543.05c	plasma membrane borate efflux transmembrane transporter Bor1 (predicted)	GO:0034613	cellular protein localization	BP	1	0.107943	1	4.47758		FALSE	TRUE	FALSE
SPBC543.05c	plasma membrane borate efflux transmembrane transporter Bor1 (predicted)	GO:0033036	macromolecule localization	BP	1	0.114053	1	4.13408		FALSE	TRUE	FALSE
SPBC543.05c	plasma membrane borate efflux transmembrane transporter Bor1 (predicted)	GO:0071702	organic substance transport	BP	1	0.177189	1	4.15874		FALSE	TRUE	FALSE
SPAPB24D3.01	transcription factor (predicted)	GO:0006357	regulation of transcription by RNA polymerase II	BP	1	0.171079	1	4.46479	experimental	FALSE	FALSE	FALSE
SPBC36B7.07	SNARE Tlg1 (predicted)	GO:0045184	establishment of protein localization	BP	1	0.415479	1	4.68952		FALSE	TRUE	FALSE
SPBC36B7.07	SNARE Tlg1 (predicted)	GO:0015031	protein transport	BP	1	0.366599	1	4.73012		FALSE	TRUE	FALSE
SPBC36B7.07	SNARE Tlg1 (predicted)	GO:0051641	cellular localization	BP	1	0.625255	1	3.67383		FALSE	TRUE	FALSE
SPBC36B7.07	SNARE Tlg1 (predicted)	GO:0051234	establishment of localization	BP	1	0.808554	1	3.47657	automatic	FALSE	TRUE	FALSE
SPBC36B7.07	SNARE Tlg1 (predicted)	GO:0071705	nitrogen compound transport	BP	1	0.352342	1	4.27088		FALSE	TRUE	FALSE
SPBC36B7.07	SNARE Tlg1 (predicted)	GO:0046907	intracellular transport	BP	1	0.653768	1	4.17446		FALSE	TRUE	FALSE
SPBC36B7.07	SNARE Tlg1 (predicted)	GO:0042886	amide transport	BP	1	0.389002	1	4.6328		FALSE	TRUE	FALSE
SPBC36B7.07	SNARE Tlg1 (predicted)	GO:0033036	macromolecule localization	BP	1	0.380855	1	4.13408		FALSE	TRUE	FALSE
SPBC36B7.07	SNARE Tlg1 (predicted)	GO:0006810	transport	BP	1	0.778004	1	3.50456	automatic	FALSE	TRUE	FALSE
SPBC36B7.07	SNARE Tlg1 (predicted)	GO:0008104	protein localization	BP	1	0.437882	1	4.14326		FALSE	TRUE	FALSE
SPBC36B7.07	SNARE Tlg1 (predicted)	GO:0071702	organic substance transport	BP	1	0.299389	1	4.15874		FALSE	TRUE	FALSE
SPBC36B7.07	SNARE Tlg1 (predicted)	GO:0015833	peptide transport	BP	1	0.295316	1	4.66076		FALSE	TRUE	FALSE
SPBC36B7.07	SNARE Tlg1 (predicted)	GO:0051179	localization	BP	1	0.818737	1	3.1988	automatic	FALSE	TRUE	FALSE
SPAC1039.05c	transcription factor, zf-fungal binuclear cluster type Klf1	GO:0045944	positive regulation of transcription by RNA polymerase II	BP	1	0.105906	1	5.42327	experimental	FALSE	FALSE	FALSE
SPBC215.06c	nucleolar RNA-binding protein, human LYAR homolog, implicated in transcriptional regulation	GO:0060255	regulation of macromolecule metabolic process	BP	1	0.101833	1	3.55445		TRUE	TRUE	TRUE
SPBC215.06c	nucleolar RNA-binding protein, human LYAR homolog, implicated in transcriptional regulation	GO:0010556	regulation of macromolecule biosynthetic process	BP	1	0.101833	1	3.95481		TRUE	TRUE	TRUE
SPCC1753.01c	single-stranded DNA binding protein Ssb2	GO:0048519	negative regulation of biological process	BP	1	0.258656	1	3.83054		FALSE	TRUE	FALSE
SPAC1399.01c	nucleobase transmembrane transporter (predicted)	GO:0006811	ion transport	BP	1	0.203666	1	4.86602		FALSE	TRUE	FALSE
SPAC23H3.11c	beta-glucan biosynthesis protein (predicted)	GO:0016043	cellular component organization	BP	1	0.193483	1	3.17343		FALSE	FALSE	FALSE
SPCC74.01	SNARE binding protein Sly1 (predicted)	GO:0016192	vesicle-mediated transport	BP	1	0.568228	1	4.73012	curated	FALSE	TRUE	FALSE
SPAC15A10.06	CPA1 sodium ion/proton antiporter (predicted)	GO:0048518	positive regulation of biological process	BP	1	0.101833	1	3.96761		FALSE	TRUE	FALSE
SPAC15A10.06	CPA1 sodium ion/proton antiporter (predicted)	GO:0016043	cellular component organization	BP	1	0.160896	1	3.17343		FALSE	TRUE	FALSE
SPAC15A10.06	CPA1 sodium ion/proton antiporter (predicted)	GO:0050794	regulation of cellular process	BP	1	0.177189	1	2.8982		FALSE	TRUE	FALSE
SPAC869.03c	plasma membrane urea transmembrane transporter (predicted)	GO:0006811	ion transport	BP	1	0.162933	1	4.86602		FALSE	FALSE	FALSE
SPBPB8B6.02c	plasma membrane urea transmembrane transporter (predicted)	GO:0006811	ion transport	BP	1	0.142566	1	4.86602		FALSE	FALSE	FALSE
SPBPB8B6.02c	plasma membrane urea transmembrane transporter (predicted)	GO:0006812	cation transport	BP	1	0.10387	1	5.38532		FALSE	FALSE	FALSE
SPAC1F7.11c	transcription factor, zf-fungal binuclear cluster type (predicted)	GO:0019222	regulation of metabolic process	BP	1	0.315682	1	3.51189		FALSE	FALSE	FALSE
SPAC1F7.11c	transcription factor, zf-fungal binuclear cluster type (predicted)	GO:0009893	positive regulation of metabolic process	BP	1	0.183299	1	4.74684		FALSE	FALSE	FALSE
SPAC1F7.11c	transcription factor, zf-fungal binuclear cluster type (predicted)	GO:0048518	positive regulation of biological process	BP	1	0.169043	1	3.96761		FALSE	FALSE	FALSE
SPAC1F7.11c	transcription factor, zf-fungal binuclear cluster type (predicted)	GO:0009891	positive regulation of biosynthetic process	BP	1	0.169043	1	5.01596		FALSE	FALSE	FALSE
SPAC1F7.11c	transcription factor, zf-fungal binuclear cluster type (predicted)	GO:0009889	regulation of biosynthetic process	BP	1	0.264766	1	3.91981		FALSE	FALSE	FALSE
SPBC216.06c	replication fork protection complex subunit Swi1	GO:0010389	regulation of G2/M transition of mitotic cell cycle	BP	1	0.348269	1	5.82598	experimental	FALSE	TRUE	FALSE
SPBC216.06c	replication fork protection complex subunit Swi1	GO:0010948	negative regulation of cell cycle process	BP	1	0.372709	1	5.3335	experimental	FALSE	TRUE	FALSE
SPBC216.06c	replication fork protection complex subunit Swi1	GO:1902749	regulation of cell cycle G2/M phase transition	BP	1	0.219959	1	5.80148	experimental	FALSE	TRUE	FALSE
SPBC216.06c	replication fork protection complex subunit Swi1	GO:1903047	mitotic cell cycle process	BP	1	0.655804	1	4.2553	experimental	FALSE	TRUE	FALSE
SPBC216.06c	replication fork protection complex subunit Swi1	GO:0022402	cell cycle process	BP	1	0.800407	1	3.7611	experimental	FALSE	TRUE	FALSE
SPBC216.06c	replication fork protection complex subunit Swi1	GO:0007346	regulation of mitotic cell cycle	BP	1	0.393075	1	4.64288	experimental	FALSE	TRUE	FALSE
SPBC216.06c	replication fork protection complex subunit Swi1	GO:1901988	negative regulation of cell cycle phase transition	BP	1	0.276986	1	5.94894	experimental	FALSE	TRUE	FALSE
SPBC216.06c	replication fork protection complex subunit Swi1	GO:1901991	negative regulation of mitotic cell cycle phase transition	BP	1	0.291242	1	6.0368	experimental	FALSE	TRUE	FALSE
SPBC216.06c	replication fork protection complex subunit Swi1	GO:0045786	negative regulation of cell cycle	BP	1	0.272912	1	5.15371	experimental	FALSE	TRUE	FALSE
SPBC216.06c	replication fork protection complex subunit Swi1	GO:1901990	regulation of mitotic cell cycle phase transition	BP	1	0.307536	1	5.06494	experimental	FALSE	TRUE	FALSE
SPBC216.06c	replication fork protection complex subunit Swi1	GO:0045930	negative regulation of mitotic cell cycle	BP	1	0.295316	1	5.51582	experimental	FALSE	TRUE	FALSE
SPBC216.06c	replication fork protection complex subunit Swi1	GO:0010564	regulation of cell cycle process	BP	1	0.317719	1	4.45635	experimental	FALSE	TRUE	FALSE
SPBC216.06c	replication fork protection complex subunit Swi1	GO:0051726	regulation of cell cycle	BP	1	0.389002	1	4.33391	experimental	FALSE	TRUE	FALSE
SPBC216.06c	replication fork protection complex subunit Swi1	GO:1901987	regulation of cell cycle phase transition	BP	1	0.228106	1	5.005	experimental	FALSE	TRUE	FALSE
SPBC1683.05	plasma membrane uricil/uridine transmembrane transporter transmembrane transporter family (predicted)	GO:0071702	organic substance transport	BP	1	0.380855	1	4.15874		FALSE	FALSE	FALSE
SPBC1683.05	plasma membrane uricil/uridine transmembrane transporter transmembrane transporter family (predicted)	GO:0051234	establishment of localization	BP	1	0.515275	1	3.47657	automatic	FALSE	FALSE	FALSE
SPBC1683.05	plasma membrane uricil/uridine transmembrane transporter transmembrane transporter family (predicted)	GO:0006810	transport	BP	1	0.446029	1	3.50456	automatic	FALSE	FALSE	FALSE
SPBC1683.05	plasma membrane uricil/uridine transmembrane transporter transmembrane transporter family (predicted)	GO:0051179	localization	BP	1	0.507128	1	3.1988	automatic	FALSE	FALSE	FALSE
SPBC1683.05	plasma membrane uricil/uridine transmembrane transporter transmembrane transporter family (predicted)	GO:0071705	nitrogen compound transport	BP	1	0.262729	1	4.27088		FALSE	FALSE	FALSE
SPCC18.08	mitochondrial lysine-tRNA ligase (predicted)	GO:0008033	tRNA processing	BP	1	0.148676	1	6.00665		FALSE	TRUE	FALSE
SPCC18.08	mitochondrial lysine-tRNA ligase (predicted)	GO:0006396	RNA processing	BP	1	0.154786	1	4.40317		FALSE	TRUE	FALSE
SPCC18.08	mitochondrial lysine-tRNA ligase (predicted)	GO:0034470	ncRNA processing	BP	1	0.158859	1	4.85971		FALSE	TRUE	FALSE
SPCC18.08	mitochondrial lysine-tRNA ligase (predicted)	GO:1901566	organonitrogen compound biosynthetic process	BP	1	0.112016	1	3.94847	curated	FALSE	TRUE	FALSE
SPAC23D3.06c	nucleoporin, WD repeat Nup146	GO:0045184	establishment of protein localization	BP	1	0.14664	1	4.68952	curated	FALSE	TRUE	FALSE
SPAC23D3.06c	nucleoporin, WD repeat Nup146	GO:0015031	protein transport	BP	1	0.160896	1	4.73012	curated	FALSE	TRUE	FALSE
SPAC23D3.06c	nucleoporin, WD repeat Nup146	GO:0006886	intracellular protein transport	BP	1	0.150713	1	4.76669	curated	FALSE	TRUE	FALSE
SPAC23D3.06c	nucleoporin, WD repeat Nup146	GO:0042886	amide transport	BP	1	0.217923	1	4.6328	curated	FALSE	TRUE	FALSE
SPAC23D3.06c	nucleoporin, WD repeat Nup146	GO:0033036	macromolecule localization	BP	1	0.211813	1	4.13408	curated	FALSE	TRUE	FALSE
SPAC23D3.06c	nucleoporin, WD repeat Nup146	GO:0008104	protein localization	BP	1	0.207739	1	4.14326	curated	FALSE	TRUE	FALSE
SPAC23D3.06c	nucleoporin, WD repeat Nup146	GO:0015833	peptide transport	BP	1	0.171079	1	4.66076	curated	FALSE	TRUE	FALSE
SPAC23D3.06c	nucleoporin, WD repeat Nup146	GO:0033365	protein localization to organelle	BP	1	0.195519	1	4.96928		FALSE	TRUE	FALSE
SPAC23D3.06c	nucleoporin, WD repeat Nup146	GO:0070727	cellular macromolecule localization	BP	1	0.205703	1	4.47116	curated	FALSE	TRUE	FALSE
SPAC23D3.06c	nucleoporin, WD repeat Nup146	GO:0034613	cellular protein localization	BP	1	0.148676	1	4.47758	curated	FALSE	TRUE	FALSE
SPAC23D3.06c	nucleoporin, WD repeat Nup146	GO:0072594	establishment of protein localization to organelle	BP	1	0.144603	1	5.4978		FALSE	TRUE	FALSE
SPAC23D3.06c	nucleoporin, WD repeat Nup146	GO:0016043	cellular component organization	BP	1	0.173116	1	3.17343		FALSE	TRUE	FALSE
SPAC23H4.15	ribosome biogenesis protein Tsr1 (predicted)	GO:0006364	rRNA processing	BP	1	0.142566	1	5.35391	curated	FALSE	TRUE	FALSE
SPCC338.15	dolichyl-di-phosphooligosaccharide-protein glycotransferase subunit Wbp1 (predicted)	GO:0006464	cellular protein modification process	BP	1	0.372709	1	4.25702	automatic	FALSE	TRUE	FALSE
SPCC338.15	dolichyl-di-phosphooligosaccharide-protein glycotransferase subunit Wbp1 (predicted)	GO:0036211	protein modification process	BP	1	0.287169	1	4.25702	automatic	FALSE	TRUE	FALSE
SPCC338.15	dolichyl-di-phosphooligosaccharide-protein glycotransferase subunit Wbp1 (predicted)	GO:0043412	macromolecule modification	BP	1	0.319756	1	4.03422	automatic	FALSE	TRUE	FALSE
SPCC338.15	dolichyl-di-phosphooligosaccharide-protein glycotransferase subunit Wbp1 (predicted)	GO:0044267	cellular protein metabolic process	BP	1	0.384929	1	3.76847	automatic	FALSE	TRUE	FALSE
SPCC338.15	dolichyl-di-phosphooligosaccharide-protein glycotransferase subunit Wbp1 (predicted)	GO:0019538	protein metabolic process	BP	1	0.490835	1	3.49327	automatic	FALSE	TRUE	FALSE
SPCC338.15	dolichyl-di-phosphooligosaccharide-protein glycotransferase subunit Wbp1 (predicted)	GO:0070085	glycosylation	BP	1	0.352342	1	6.29103	automatic	FALSE	TRUE	FALSE
SPCC1620.09c	transcription factor TFIIF complex alpha subunit Tfg1 (predicted)	GO:0006355	regulation of transcription, DNA-templated	BP	1	0.346232	1	4.19205		FALSE	TRUE	FALSE
SPCC1620.09c	transcription factor TFIIF complex alpha subunit Tfg1 (predicted)	GO:1903506	regulation of nucleic acid-templated transcription	BP	1	0.360489	1	4.18242		FALSE	TRUE	FALSE
SPCC1620.09c	transcription factor TFIIF complex alpha subunit Tfg1 (predicted)	GO:0043412	macromolecule modification	BP	1	0.114053	1	4.03422		FALSE	TRUE	FALSE
SPCC1620.09c	transcription factor TFIIF complex alpha subunit Tfg1 (predicted)	GO:0006357	regulation of transcription by RNA polymerase II	BP	1	0.207739	1	4.46479		FALSE	TRUE	FALSE
SPCC1620.09c	transcription factor TFIIF complex alpha subunit Tfg1 (predicted)	GO:0019538	protein metabolic process	BP	1	0.132383	1	3.49327		FALSE	TRUE	FALSE
SPCC1620.09c	transcription factor TFIIF complex alpha subunit Tfg1 (predicted)	GO:0060255	regulation of macromolecule metabolic process	BP	1	0.350305	1	3.55445		FALSE	TRUE	FALSE
SPCC1620.09c	transcription factor TFIIF complex alpha subunit Tfg1 (predicted)	GO:0031323	regulation of cellular metabolic process	BP	1	0.368635	1	3.69519		FALSE	TRUE	FALSE
SPCC1620.09c	transcription factor TFIIF complex alpha subunit Tfg1 (predicted)	GO:0010468	regulation of gene expression	BP	1	0.386965	1	3.8283		FALSE	TRUE	FALSE
SPCC1620.09c	transcription factor TFIIF complex alpha subunit Tfg1 (predicted)	GO:0051252	regulation of RNA metabolic process	BP	1	0.342159	1	4.14479		FALSE	TRUE	FALSE
SPCC1620.09c	transcription factor TFIIF complex alpha subunit Tfg1 (predicted)	GO:0051171	regulation of nitrogen compound metabolic process	BP	1	0.389002	1	3.77908		FALSE	TRUE	FALSE
SPCC1620.09c	transcription factor TFIIF complex alpha subunit Tfg1 (predicted)	GO:2001141	regulation of RNA biosynthetic process	BP	1	0.319756	1	4.18082		FALSE	TRUE	FALSE
SPCC1620.09c	transcription factor TFIIF complex alpha subunit Tfg1 (predicted)	GO:0019222	regulation of metabolic process	BP	1	0.340122	1	3.51189		FALSE	TRUE	FALSE
SPCC1620.09c	transcription factor TFIIF complex alpha subunit Tfg1 (predicted)	GO:0050794	regulation of cellular process	BP	1	0.393075	1	2.8982		FALSE	TRUE	FALSE
SPCC1620.09c	transcription factor TFIIF complex alpha subunit Tfg1 (predicted)	GO:2000112	regulation of cellular macromolecule biosynthetic process	BP	1	0.338086	1	3.96376		FALSE	TRUE	FALSE
SPCC1620.09c	transcription factor TFIIF complex alpha subunit Tfg1 (predicted)	GO:0080090	regulation of primary metabolic process	BP	1	0.311609	1	3.74241		FALSE	TRUE	FALSE
SPCC1620.09c	transcription factor TFIIF complex alpha subunit Tfg1 (predicted)	GO:0010556	regulation of macromolecule biosynthetic process	BP	1	0.309572	1	3.95481		FALSE	TRUE	FALSE
SPCC1620.09c	transcription factor TFIIF complex alpha subunit Tfg1 (predicted)	GO:0009889	regulation of biosynthetic process	BP	1	0.380855	1	3.91981		FALSE	TRUE	FALSE
SPCC1620.09c	transcription factor TFIIF complex alpha subunit Tfg1 (predicted)	GO:0019219	regulation of nucleobase-containing compound metabolic process	BP	1	0.331976	1	3.97408		FALSE	TRUE	FALSE
SPCC1620.09c	transcription factor TFIIF complex alpha subunit Tfg1 (predicted)	GO:0031326	regulation of cellular biosynthetic process	BP	1	0.352342	1	3.91981		FALSE	TRUE	FALSE
SPAC1071.02	CIA machinery protein Mms19	GO:0090304	nucleic acid metabolic process	BP	1	0.272912	1	3.20299		FALSE	TRUE	FALSE
SPAC1071.02	CIA machinery protein Mms19	GO:0016043	cellular component organization	BP	1	0.315682	1	3.17343		FALSE	TRUE	FALSE
SPAC26H5.08c	glucan beta-glucosidase Bgl2 (predicted)	GO:0071554	cell wall organization or biogenesis	BP	1	0.144603	1	6.37327	curated	FALSE	FALSE	FALSE
SPAC26H5.08c	glucan beta-glucosidase Bgl2 (predicted)	GO:0016043	cellular component organization	BP	1	0.167006	1	3.17343		FALSE	FALSE	FALSE
SPAC7D4.05	HAD superfamily hydrolase, unknown role	GO:0055086	nucleobase-containing small molecule metabolic process	BP	1	0.185336	1	5.04582		TRUE	TRUE	TRUE
SPAC7D4.05	HAD superfamily hydrolase, unknown role	GO:0044281	small molecule metabolic process	BP	1	0.291242	1	3.83054		TRUE	TRUE	TRUE
SPAC7D4.05	HAD superfamily hydrolase, unknown role	GO:0044271	cellular nitrogen compound biosynthetic process	BP	1	0.201629	1	3.90396		TRUE	TRUE	TRUE
SPAC7D4.05	HAD superfamily hydrolase, unknown role	GO:1901362	organic cyclic compound biosynthetic process	BP	1	0.175153	1	4.35078		TRUE	TRUE	TRUE
SPAC7D4.05	HAD superfamily hydrolase, unknown role	GO:0034654	nucleobase-containing compound biosynthetic process	BP	1	0.144603	1	4.71913		TRUE	TRUE	TRUE
SPAC7D4.05	HAD superfamily hydrolase, unknown role	GO:0018130	heterocycle biosynthetic process	BP	1	0.177189	1	4.44798		TRUE	TRUE	TRUE
SPAC7D4.05	HAD superfamily hydrolase, unknown role	GO:0019438	aromatic compound biosynthetic process	BP	1	0.169043	1	4.48404		TRUE	TRUE	TRUE
SPCC1322.12c	mitotic spindle checkpoint kinase Bub1	GO:0019222	regulation of metabolic process	BP	1	0.164969	1	3.51189		FALSE	TRUE	FALSE
SPCC1322.12c	mitotic spindle checkpoint kinase Bub1	GO:0031323	regulation of cellular metabolic process	BP	1	0.175153	1	3.69519		FALSE	TRUE	FALSE
SPCC70.06	nuclear export factor Sac32 (predicted)	GO:0060255	regulation of macromolecule metabolic process	BP	1	0.136456	1	3.55445		FALSE	TRUE	FALSE
SPCC70.06	nuclear export factor Sac32 (predicted)	GO:0031323	regulation of cellular metabolic process	BP	1	0.101833	1	3.69519		FALSE	TRUE	FALSE
SPCC70.06	nuclear export factor Sac32 (predicted)	GO:0051171	regulation of nitrogen compound metabolic process	BP	1	0.101833	1	3.77908		FALSE	TRUE	FALSE
SPCC70.06	nuclear export factor Sac32 (predicted)	GO:0019222	regulation of metabolic process	BP	1	0.10387	1	3.51189		FALSE	TRUE	FALSE
SPCC70.06	nuclear export factor Sac32 (predicted)	GO:0050794	regulation of cellular process	BP	1	0.244399	1	2.8982		FALSE	TRUE	FALSE
SPCC1906.04	wtf element Wtf20	GO:0022414	reproductive process	BP	1	0.321792	1	4.58151	curated	FALSE	FALSE	FALSE
SPAC12B10.08c	mitochondrial tRNA(Ile)-lysidine synthetase Til1 (predicted)	GO:0016043	cellular component organization	BP	1	0.132383	1	3.17343		FALSE	FALSE	FALSE
SPAC22E12.01	Golgi phosphoenolpyruvate transmembrane transporter Pet3	GO:0071705	nitrogen compound transport	BP	1	0.211813	1	4.27088		FALSE	TRUE	FALSE
SPAC22E12.01	Golgi phosphoenolpyruvate transmembrane transporter Pet3	GO:0015931	nucleobase-containing compound transport	BP	1	0.221996	1	6.02665		FALSE	TRUE	FALSE
SPAC1F5.11c	NuA4 complex phosphatidylinositol pseudokinase complex subunit Tra2	GO:0006355	regulation of transcription, DNA-templated	BP	1	0.213849	1	4.19205		FALSE	TRUE	FALSE
SPAC1F5.11c	NuA4 complex phosphatidylinositol pseudokinase complex subunit Tra2	GO:0051252	regulation of RNA metabolic process	BP	1	0.205703	1	4.14479		FALSE	TRUE	FALSE
SPAC1F5.11c	NuA4 complex phosphatidylinositol pseudokinase complex subunit Tra2	GO:1903506	regulation of nucleic acid-templated transcription	BP	1	0.224033	1	4.18242		FALSE	TRUE	FALSE
SPAC1F5.11c	NuA4 complex phosphatidylinositol pseudokinase complex subunit Tra2	GO:0019219	regulation of nucleobase-containing compound metabolic process	BP	1	0.313646	1	3.97408		FALSE	TRUE	FALSE
SPAC1F5.11c	NuA4 complex phosphatidylinositol pseudokinase complex subunit Tra2	GO:0051171	regulation of nitrogen compound metabolic process	BP	1	0.427699	1	3.77908		FALSE	TRUE	FALSE
SPAC1F5.11c	NuA4 complex phosphatidylinositol pseudokinase complex subunit Tra2	GO:2001141	regulation of RNA biosynthetic process	BP	1	0.175153	1	4.18082		FALSE	TRUE	FALSE
SPAC1F5.11c	NuA4 complex phosphatidylinositol pseudokinase complex subunit Tra2	GO:0019222	regulation of metabolic process	BP	1	0.429735	1	3.51189		FALSE	TRUE	FALSE
SPAC1F5.11c	NuA4 complex phosphatidylinositol pseudokinase complex subunit Tra2	GO:0050794	regulation of cellular process	BP	1	0.712831	1	2.8982		FALSE	TRUE	FALSE
SPAC1F5.11c	NuA4 complex phosphatidylinositol pseudokinase complex subunit Tra2	GO:0060255	regulation of macromolecule metabolic process	BP	1	0.360489	1	3.55445		FALSE	TRUE	FALSE
SPAC1F5.11c	NuA4 complex phosphatidylinositol pseudokinase complex subunit Tra2	GO:0009889	regulation of biosynthetic process	BP	1	0.342159	1	3.91981		FALSE	TRUE	FALSE
SPAC1F5.11c	NuA4 complex phosphatidylinositol pseudokinase complex subunit Tra2	GO:2000112	regulation of cellular macromolecule biosynthetic process	BP	1	0.344196	1	3.96376		FALSE	TRUE	FALSE
SPAC1F5.11c	NuA4 complex phosphatidylinositol pseudokinase complex subunit Tra2	GO:0080090	regulation of primary metabolic process	BP	1	0.325866	1	3.74241		FALSE	TRUE	FALSE
SPAC1F5.11c	NuA4 complex phosphatidylinositol pseudokinase complex subunit Tra2	GO:0010556	regulation of macromolecule biosynthetic process	BP	1	0.270876	1	3.95481		FALSE	TRUE	FALSE
SPAC1F5.11c	NuA4 complex phosphatidylinositol pseudokinase complex subunit Tra2	GO:0031323	regulation of cellular metabolic process	BP	1	0.374745	1	3.69519		FALSE	TRUE	FALSE
SPAC1F5.11c	NuA4 complex phosphatidylinositol pseudokinase complex subunit Tra2	GO:0010468	regulation of gene expression	BP	1	0.207739	1	3.8283		FALSE	TRUE	FALSE
SPAC1F5.11c	NuA4 complex phosphatidylinositol pseudokinase complex subunit Tra2	GO:0031326	regulation of cellular biosynthetic process	BP	1	0.291242	1	3.91981		FALSE	TRUE	FALSE
SPBC577.13	inositol-polyphosphate 5-phosphatase, synaptojanin homolog 2 (predicted)	GO:0006810	transport	BP	1	0.350305	1	3.50456		FALSE	TRUE	FALSE
SPBC577.13	inositol-polyphosphate 5-phosphatase, synaptojanin homolog 2 (predicted)	GO:0051234	establishment of localization	BP	1	0.389002	1	3.47657		FALSE	TRUE	FALSE
SPBC577.13	inositol-polyphosphate 5-phosphatase, synaptojanin homolog 2 (predicted)	GO:0051179	localization	BP	1	0.466395	1	3.1988		FALSE	TRUE	FALSE
SPBC577.13	inositol-polyphosphate 5-phosphatase, synaptojanin homolog 2 (predicted)	GO:0006996	organelle organization	BP	1	0.191446	1	4.03836		FALSE	TRUE	FALSE
SPBC577.13	inositol-polyphosphate 5-phosphatase, synaptojanin homolog 2 (predicted)	GO:0016043	cellular component organization	BP	1	0.171079	1	3.17343		FALSE	TRUE	FALSE
SPAC637.06	alpha-1,2-galactosyltransferase (predicted)	GO:1901135	carbohydrate derivative metabolic process	BP	1	0.264766	1	4.98698	curated	FALSE	FALSE	FALSE
SPBC25H2.14	UNC-50 family protein, implicated in vesicle-mediated transport	GO:0016192	vesicle-mediated transport	BP	1	0.274949	1	4.73012		TRUE	TRUE	TRUE
SPBC25H2.14	UNC-50 family protein, implicated in vesicle-mediated transport	GO:0051234	establishment of localization	BP	1	0.370672	1	3.47657		TRUE	TRUE	TRUE
SPBC25H2.14	UNC-50 family protein, implicated in vesicle-mediated transport	GO:0006810	transport	BP	1	0.366599	1	3.50456		TRUE	TRUE	TRUE
SPBC25H2.14	UNC-50 family protein, implicated in vesicle-mediated transport	GO:0051179	localization	BP	1	0.433809	1	3.1988		TRUE	TRUE	TRUE
SPAC24H6.13	calcium permeable stress-gated cation channel (predicted)	GO:0016192	vesicle-mediated transport	BP	1	0.162933	1	4.73012	curated	FALSE	TRUE	FALSE
SPAC2G11.02	ribosome biogenesis protein Urb2 (predicted)	GO:0016072	rRNA metabolic process	BP	1	0.148676	1	5.21012		FALSE	TRUE	FALSE
SPAC2G11.02	ribosome biogenesis protein Urb2 (predicted)	GO:0016070	RNA metabolic process	BP	1	0.205703	1	3.70307		FALSE	TRUE	FALSE
SPAC2G11.02	ribosome biogenesis protein Urb2 (predicted)	GO:0034660	ncRNA metabolic process	BP	1	0.195519	1	4.55334		FALSE	TRUE	FALSE
SPAC2G11.02	ribosome biogenesis protein Urb2 (predicted)	GO:0090304	nucleic acid metabolic process	BP	1	0.254582	1	3.20299		FALSE	TRUE	FALSE
SPAC14C4.03	Cds1/Rad53/Chk2 family protein kinase Mek1	GO:0006464	cellular protein modification process	BP	1	0.14664	1	4.25702		FALSE	FALSE	FALSE
SPAC14C4.03	Cds1/Rad53/Chk2 family protein kinase Mek1	GO:0006793	phosphorus metabolic process	BP	1	0.14664	1	4.53955		FALSE	FALSE	FALSE
SPAC14C4.03	Cds1/Rad53/Chk2 family protein kinase Mek1	GO:0036211	protein modification process	BP	1	0.156823	1	4.25702		FALSE	FALSE	FALSE
SPAC14C4.03	Cds1/Rad53/Chk2 family protein kinase Mek1	GO:0006796	phosphate-containing compound metabolic process	BP	1	0.107943	1	4.57439		FALSE	FALSE	FALSE
SPAC14C4.03	Cds1/Rad53/Chk2 family protein kinase Mek1	GO:0043412	macromolecule modification	BP	1	0.156823	1	4.03422		FALSE	FALSE	FALSE
SPAC14C4.03	Cds1/Rad53/Chk2 family protein kinase Mek1	GO:0044267	cellular protein metabolic process	BP	1	0.132383	1	3.76847		FALSE	FALSE	FALSE
SPAC14C4.03	Cds1/Rad53/Chk2 family protein kinase Mek1	GO:0019538	protein metabolic process	BP	1	0.203666	1	3.49327		FALSE	FALSE	FALSE
SPAC4D7.10c	SAGA complex subunit Spt20	GO:0006357	regulation of transcription by RNA polymerase II	BP	1	0.171079	1	4.46479	experimental	FALSE	TRUE	FALSE
SPCC162.06c	vacuolar sorting protein Vps60 (predicted)	GO:0033365	protein localization to organelle	BP	1	0.260692	1	4.96928		FALSE	TRUE	FALSE
SPCC162.06c	vacuolar sorting protein Vps60 (predicted)	GO:0070727	cellular macromolecule localization	BP	1	0.219959	1	4.47116	curated	FALSE	TRUE	FALSE
SPCC162.06c	vacuolar sorting protein Vps60 (predicted)	GO:0034613	cellular protein localization	BP	1	0.285132	1	4.47758	curated	FALSE	TRUE	FALSE
SPCC162.06c	vacuolar sorting protein Vps60 (predicted)	GO:0016043	cellular component organization	BP	1	0.213849	1	3.17343		FALSE	TRUE	FALSE
SPCC162.06c	vacuolar sorting protein Vps60 (predicted)	GO:0006996	organelle organization	BP	1	0.126273	1	4.03836		FALSE	TRUE	FALSE
SPAC3H1.13	serine/threonine protein kinase Ppk13 (predicted)	GO:0006464	cellular protein modification process	BP	1	0.118126	1	4.25702		FALSE	TRUE	FALSE
SPAC3H1.13	serine/threonine protein kinase Ppk13 (predicted)	GO:0043412	macromolecule modification	BP	1	0.132383	1	4.03422		FALSE	TRUE	FALSE
SPAC3H1.13	serine/threonine protein kinase Ppk13 (predicted)	GO:0044267	cellular protein metabolic process	BP	1	0.11609	1	3.76847		FALSE	TRUE	FALSE
SPAC3H1.13	serine/threonine protein kinase Ppk13 (predicted)	GO:0019538	protein metabolic process	BP	1	0.201629	1	3.49327		FALSE	TRUE	FALSE
SPCC895.09c	ATP-dependent RNA helicase Ucp12, unknown location and role, implicated in mRNA processing (predicted)	GO:0016043	cellular component organization	BP	1	0.354379	1	3.17343		TRUE	TRUE	TRUE
SPBC16A3.14	superoxide dismutase, mitochondrial ribosomal protein subunit (predicted)	GO:0070887	cellular response to chemical stimulus	BP	1	0.13442	1	5.64503	curated	FALSE	FALSE	FALSE
SPBC16A3.14	superoxide dismutase, mitochondrial ribosomal protein subunit (predicted)	GO:0051716	cellular response to stimulus	BP	1	0.10998	1	4.04948	curated	FALSE	FALSE	FALSE
SPBC16A3.14	superoxide dismutase, mitochondrial ribosomal protein subunit (predicted)	GO:0050896	response to stimulus	BP	1	0.136456	1	4.04113	curated	FALSE	FALSE	FALSE
SPAC31A2.12	arrestin/PY protein involved in ubiquitin-mediated endocytosis Rod1 (predicted)	GO:0050794	regulation of cellular process	BP	1	0.205703	1	2.8982		FALSE	TRUE	FALSE
SPAC3H1.04c	mitochondrial inner membrane protein Mdm31	GO:0051641	cellular localization	BP	1	0.187373	1	3.67383	automatic	FALSE	FALSE	FALSE
SPAC3H1.04c	mitochondrial inner membrane protein Mdm31	GO:0006996	organelle organization	BP	1	0.173116	1	4.03836	automatic	FALSE	FALSE	FALSE
SPAC3H1.04c	mitochondrial inner membrane protein Mdm31	GO:0007005	mitochondrion organization	BP	1	0.11609	1	6.09998	automatic	FALSE	FALSE	FALSE
SPAC3H1.04c	mitochondrial inner membrane protein Mdm31	GO:0016043	cellular component organization	BP	1	0.327902	1	3.17343	automatic	FALSE	FALSE	FALSE
SPAC3H1.04c	mitochondrial inner membrane protein Mdm31	GO:0051179	localization	BP	1	0.305499	1	3.1988	automatic	FALSE	FALSE	FALSE
SPAC23D3.11	1-acyldihydroxyacetone phosphate reductase Ayr1 (predicted)	GO:1901362	organic cyclic compound biosynthetic process	BP	1	0.175153	1	4.35078		FALSE	TRUE	FALSE
SPBC1A4.10c	mediator complex subunit Med14	GO:0044271	cellular nitrogen compound biosynthetic process	BP	1	0.148676	1	3.90396	curated	FALSE	TRUE	FALSE
SPBC1A4.10c	mediator complex subunit Med14	GO:1901362	organic cyclic compound biosynthetic process	BP	1	0.132383	1	4.35078	curated	FALSE	TRUE	FALSE
SPBC1A4.10c	mediator complex subunit Med14	GO:0016070	RNA metabolic process	BP	1	0.221996	1	3.70307	curated	FALSE	TRUE	FALSE
SPBC1A4.10c	mediator complex subunit Med14	GO:0032774	RNA biosynthetic process	BP	1	0.150713	1	5.5219	curated	FALSE	TRUE	FALSE
SPBC1A4.10c	mediator complex subunit Med14	GO:0034654	nucleobase-containing compound biosynthetic process	BP	1	0.12831	1	4.71913	curated	FALSE	TRUE	FALSE
SPBC1A4.10c	mediator complex subunit Med14	GO:0090304	nucleic acid metabolic process	BP	1	0.268839	1	3.20299	curated	FALSE	TRUE	FALSE
SPBC1A4.10c	mediator complex subunit Med14	GO:0009059	macromolecule biosynthetic process	BP	1	0.118126	1	3.92473	curated	FALSE	TRUE	FALSE
SPBC1A4.10c	mediator complex subunit Med14	GO:0018130	heterocycle biosynthetic process	BP	1	0.118126	1	4.44798	curated	FALSE	TRUE	FALSE
SPBC1A4.10c	mediator complex subunit Med14	GO:0019438	aromatic compound biosynthetic process	BP	1	0.144603	1	4.48404	curated	FALSE	TRUE	FALSE
SPBC26H8.09c	SWI/SNF complex subunit Snf59	GO:0006357	regulation of transcription by RNA polymerase II	BP	1	0.1222	1	4.46479	experimental	FALSE	FALSE	FALSE
SPAC57A7.11	WD repeat protein, Raptor homolog Mip1	GO:0023051	regulation of signaling	BP	1	0.158859	1	5.78548		FALSE	TRUE	FALSE
SPAC57A7.11	WD repeat protein, Raptor homolog Mip1	GO:0010646	regulation of cell communication	BP	1	0.11609	1	5.69451		FALSE	TRUE	FALSE
SPAC57A7.11	WD repeat protein, Raptor homolog Mip1	GO:0048583	regulation of response to stimulus	BP	1	0.195519	1	5.42327		FALSE	TRUE	FALSE
SPAC57A7.11	WD repeat protein, Raptor homolog Mip1	GO:0009966	regulation of signal transduction	BP	1	0.118126	1	5.79345		FALSE	TRUE	FALSE
SPAC57A7.11	WD repeat protein, Raptor homolog Mip1	GO:1902531	regulation of intracellular signal transduction	BP	1	0.11609	1	6.0166		FALSE	TRUE	FALSE
SPAC57A7.11	WD repeat protein, Raptor homolog Mip1	GO:0016043	cellular component organization	BP	1	0.401222	1	3.17343		FALSE	TRUE	FALSE
SPAC57A7.11	WD repeat protein, Raptor homolog Mip1	GO:0065008	regulation of biological quality	BP	1	0.120163	1	4.49708		FALSE	TRUE	FALSE
SPAC6B12.03c	HbrB family protein involved in TOR signaling Bit2 (predicted)	GO:0016043	cellular component organization	BP	1	0.124236	1	3.17343		FALSE	TRUE	FALSE
SPAC12G12.16c	Fen1 family nuclease, XP-G family (predicted)	GO:0006310	DNA recombination	BP	1	0.1222	1	5.63816		FALSE	TRUE	FALSE
SPAC12G12.16c	Fen1 family nuclease, XP-G family (predicted)	GO:0050794	regulation of cellular process	BP	1	0.219959	1	2.8982		FALSE	TRUE	FALSE
SPAC12G12.16c	Fen1 family nuclease, XP-G family (predicted)	GO:0048519	negative regulation of biological process	BP	1	0.126273	1	3.83054		FALSE	TRUE	FALSE
SPCC4G3.16	CMP deaminase family/ methyltransferase bifunctional enzyme involved in riboflavin biosynthesis and tRNA pseudouridine biosynthesis Rib2 (predicted)	GO:0044271	cellular nitrogen compound biosynthetic process	BP	1	0.276986	1	3.90396	automatic	FALSE	FALSE	FALSE
SPCC4G3.16	CMP deaminase family/ methyltransferase bifunctional enzyme involved in riboflavin biosynthesis and tRNA pseudouridine biosynthesis Rib2 (predicted)	GO:1901362	organic cyclic compound biosynthetic process	BP	1	0.309572	1	4.35078	automatic	FALSE	FALSE	FALSE
SPCC4G3.16	CMP deaminase family/ methyltransferase bifunctional enzyme involved in riboflavin biosynthesis and tRNA pseudouridine biosynthesis Rib2 (predicted)	GO:0044281	small molecule metabolic process	BP	1	0.427699	1	3.83054	automatic	FALSE	FALSE	FALSE
SPCC4G3.16	CMP deaminase family/ methyltransferase bifunctional enzyme involved in riboflavin biosynthesis and tRNA pseudouridine biosynthesis Rib2 (predicted)	GO:0044283	small molecule biosynthetic process	BP	1	0.272912	1	4.73844	automatic	FALSE	FALSE	FALSE
SPCC4G3.16	CMP deaminase family/ methyltransferase bifunctional enzyme involved in riboflavin biosynthesis and tRNA pseudouridine biosynthesis Rib2 (predicted)	GO:0017144	drug metabolic process	BP	1	0.215886	1	10.6218		FALSE	FALSE	FALSE
SPCC4G3.16	CMP deaminase family/ methyltransferase bifunctional enzyme involved in riboflavin biosynthesis and tRNA pseudouridine biosynthesis Rib2 (predicted)	GO:0018130	heterocycle biosynthetic process	BP	1	0.274949	1	4.44798	automatic	FALSE	FALSE	FALSE
SPCC4G3.16	CMP deaminase family/ methyltransferase bifunctional enzyme involved in riboflavin biosynthesis and tRNA pseudouridine biosynthesis Rib2 (predicted)	GO:1901566	organonitrogen compound biosynthetic process	BP	1	0.299389	1	3.94847	automatic	FALSE	FALSE	FALSE
SPCC1281.05	RSC complex subunit Rsc7	GO:0006357	regulation of transcription by RNA polymerase II	BP	1	0.132383	1	4.46479	curated	FALSE	TRUE	FALSE
SPBC19G7.15	nucleoporin Nup44	GO:0045184	establishment of protein localization	BP	1	0.244399	1	4.68952	curated	FALSE	TRUE	FALSE
SPBC19G7.15	nucleoporin Nup44	GO:0015031	protein transport	BP	1	0.207739	1	4.73012	curated	FALSE	TRUE	FALSE
SPBC19G7.15	nucleoporin Nup44	GO:0033365	protein localization to organelle	BP	1	0.169043	1	4.96928		FALSE	TRUE	FALSE
SPBC19G7.15	nucleoporin Nup44	GO:0070727	cellular macromolecule localization	BP	1	0.175153	1	4.47116	curated	FALSE	TRUE	FALSE
SPBC19G7.15	nucleoporin Nup44	GO:0034613	cellular protein localization	BP	1	0.154786	1	4.47758	curated	FALSE	TRUE	FALSE
SPBC19G7.15	nucleoporin Nup44	GO:0006886	intracellular protein transport	BP	1	0.246436	1	4.76669	curated	FALSE	TRUE	FALSE
SPBC19G7.15	nucleoporin Nup44	GO:0042886	amide transport	BP	1	0.181263	1	4.6328	curated	FALSE	TRUE	FALSE
SPBC19G7.15	nucleoporin Nup44	GO:0072594	establishment of protein localization to organelle	BP	1	0.138493	1	5.4978		FALSE	TRUE	FALSE
SPBC19G7.15	nucleoporin Nup44	GO:0033036	macromolecule localization	BP	1	0.289206	1	4.13408	curated	FALSE	TRUE	FALSE
SPBC19G7.15	nucleoporin Nup44	GO:0008104	protein localization	BP	1	0.219959	1	4.14326	curated	FALSE	TRUE	FALSE
SPBC19G7.15	nucleoporin Nup44	GO:0015833	peptide transport	BP	1	0.276986	1	4.66076	curated	FALSE	TRUE	FALSE
SPBC19G7.15	nucleoporin Nup44	GO:0017038	protein import	BP	1	0.126273	1	6.27796		FALSE	TRUE	FALSE
SPBC19G7.15	nucleoporin Nup44	GO:0016043	cellular component organization	BP	1	0.211813	1	3.17343		FALSE	TRUE	FALSE
SPBP35G2.02	26S proteasome co-factor Txc1	GO:0060255	regulation of macromolecule metabolic process	BP	1	0.10387	1	3.55445		FALSE	TRUE	FALSE
SPBP35G2.02	26S proteasome co-factor Txc1	GO:0031323	regulation of cellular metabolic process	BP	1	0.105906	1	3.69519		FALSE	TRUE	FALSE
SPBP35G2.02	26S proteasome co-factor Txc1	GO:0019222	regulation of metabolic process	BP	1	0.10387	1	3.51189		FALSE	TRUE	FALSE
SPBP35G2.02	26S proteasome co-factor Txc1	GO:0050794	regulation of cellular process	BP	1	0.179226	1	2.8982		FALSE	TRUE	FALSE
SPBP35G2.02	26S proteasome co-factor Txc1	GO:1901575	organic substance catabolic process	BP	1	0.160896	1	4.16657		FALSE	TRUE	FALSE
SPBP35G2.02	26S proteasome co-factor Txc1	GO:0044248	cellular catabolic process	BP	1	0.160896	1	4.14326		FALSE	TRUE	FALSE
SPBP35G2.02	26S proteasome co-factor Txc1	GO:0044265	cellular macromolecule catabolic process	BP	1	0.11609	1	4.54183		FALSE	TRUE	FALSE
SPBP35G2.02	26S proteasome co-factor Txc1	GO:0009056	catabolic process	BP	1	0.160896	1	4.05509		FALSE	TRUE	FALSE
SPBP35G2.02	26S proteasome co-factor Txc1	GO:0019538	protein metabolic process	BP	1	0.142566	1	3.49327		FALSE	TRUE	FALSE
SPBP35G2.02	26S proteasome co-factor Txc1	GO:0009057	macromolecule catabolic process	BP	1	0.11609	1	4.49272		FALSE	TRUE	FALSE
SPAC3G9.15c	rRNA processing protein Fcf2 (predicted)	GO:0006364	rRNA processing	BP	1	0.13442	1	5.35391	curated	FALSE	TRUE	FALSE
SPCC548.04	ubiquitin-like protein modifier Urm1 (predicted)	GO:0050896	response to stimulus	BP	1	0.112016	1	4.04113		FALSE	TRUE	FALSE
SPBC29A3.08	elongin-A, F-box protein Pof4 (predicted)	GO:0044271	cellular nitrogen compound biosynthetic process	BP	1	0.10998	1	3.90396	curated	FALSE	TRUE	FALSE
SPBC29A3.08	elongin-A, F-box protein Pof4 (predicted)	GO:0016070	RNA metabolic process	BP	1	0.201629	1	3.70307	curated	FALSE	TRUE	FALSE
SPBC29A3.08	elongin-A, F-box protein Pof4 (predicted)	GO:0032774	RNA biosynthetic process	BP	1	0.10998	1	5.5219	curated	FALSE	TRUE	FALSE
SPBC29A3.08	elongin-A, F-box protein Pof4 (predicted)	GO:0090304	nucleic acid metabolic process	BP	1	0.256619	1	3.20299	curated	FALSE	TRUE	FALSE
SPBC29A3.08	elongin-A, F-box protein Pof4 (predicted)	GO:0009059	macromolecule biosynthetic process	BP	1	0.13442	1	3.92473	curated	FALSE	TRUE	FALSE
SPBC211.08c	exosome subunit Mtr3	GO:0044271	cellular nitrogen compound biosynthetic process	BP	1	0.272912	1	3.90396		FALSE	TRUE	FALSE
SPBC211.08c	exosome subunit Mtr3	GO:1901362	organic cyclic compound biosynthetic process	BP	1	0.201629	1	4.35078		FALSE	TRUE	FALSE
SPBC211.08c	exosome subunit Mtr3	GO:0032774	RNA biosynthetic process	BP	1	0.156823	1	5.5219		FALSE	TRUE	FALSE
SPBC211.08c	exosome subunit Mtr3	GO:0009059	macromolecule biosynthetic process	BP	1	0.224033	1	3.92473		FALSE	TRUE	FALSE
SPBC211.08c	exosome subunit Mtr3	GO:0018130	heterocycle biosynthetic process	BP	1	0.256619	1	4.44798		FALSE	TRUE	FALSE
SPBC211.08c	exosome subunit Mtr3	GO:0019438	aromatic compound biosynthetic process	BP	1	0.197556	1	4.48404		FALSE	TRUE	FALSE
SPCC1442.14c	adenosine 5'-monophosphoramidase (predicted)	GO:0009117	nucleotide metabolic process	BP	1	0.154786	1	5.41228	curated	FALSE	TRUE	FALSE
SPBC17A3.06	phosphoprotein phosphatase (predicted)	GO:0032268	regulation of cellular protein metabolic process	BP	1	0.264766	1	5.51582		FALSE	TRUE	FALSE
SPBC17A3.06	phosphoprotein phosphatase (predicted)	GO:0048583	regulation of response to stimulus	BP	1	0.126273	1	5.42327		FALSE	TRUE	FALSE
SPBC17A3.06	phosphoprotein phosphatase (predicted)	GO:0031323	regulation of cellular metabolic process	BP	1	0.228106	1	3.69519		FALSE	TRUE	FALSE
SPBC17A3.06	phosphoprotein phosphatase (predicted)	GO:0048523	negative regulation of cellular process	BP	1	0.334012	1	4.08943		FALSE	TRUE	FALSE
SPBC17A3.06	phosphoprotein phosphatase (predicted)	GO:0051171	regulation of nitrogen compound metabolic process	BP	1	0.219959	1	3.77908		FALSE	TRUE	FALSE
SPBC17A3.06	phosphoprotein phosphatase (predicted)	GO:0080090	regulation of primary metabolic process	BP	1	0.350305	1	3.74241		FALSE	TRUE	FALSE
SPBC17A3.06	phosphoprotein phosphatase (predicted)	GO:0048585	negative regulation of response to stimulus	BP	1	0.160896	1	6.27796		FALSE	TRUE	FALSE
SPBC17A3.06	phosphoprotein phosphatase (predicted)	GO:0023051	regulation of signaling	BP	1	0.293279	1	5.78548		FALSE	TRUE	FALSE
SPBC17A3.06	phosphoprotein phosphatase (predicted)	GO:0051246	regulation of protein metabolic process	BP	1	0.201629	1	5.50377		FALSE	TRUE	FALSE
SPBC17A3.06	phosphoprotein phosphatase (predicted)	GO:0051174	regulation of phosphorus metabolic process	BP	1	0.193483	1	6.54423		FALSE	TRUE	FALSE
SPBC17A3.06	phosphoprotein phosphatase (predicted)	GO:0048519	negative regulation of biological process	BP	1	0.364562	1	3.83054		FALSE	TRUE	FALSE
SPBC17A3.06	phosphoprotein phosphatase (predicted)	GO:0051172	negative regulation of nitrogen compound metabolic process	BP	1	0.199593	1	5.01229		FALSE	TRUE	FALSE
SPBC17A3.06	phosphoprotein phosphatase (predicted)	GO:0060255	regulation of macromolecule metabolic process	BP	1	0.340122	1	3.55445		FALSE	TRUE	FALSE
SPBC17A3.06	phosphoprotein phosphatase (predicted)	GO:1902531	regulation of intracellular signal transduction	BP	1	0.238289	1	6.0166		FALSE	TRUE	FALSE
SPBC17A3.06	phosphoprotein phosphatase (predicted)	GO:0031399	regulation of protein modification process	BP	1	0.230143	1	6.09998		FALSE	TRUE	FALSE
SPBC17A3.06	phosphoprotein phosphatase (predicted)	GO:0010646	regulation of cell communication	BP	1	0.268839	1	5.69451		FALSE	TRUE	FALSE
SPBC17A3.06	phosphoprotein phosphatase (predicted)	GO:0019220	regulation of phosphate metabolic process	BP	1	0.179226	1	6.54423		FALSE	TRUE	FALSE
SPBC17A3.06	phosphoprotein phosphatase (predicted)	GO:0009966	regulation of signal transduction	BP	1	0.266802	1	5.79345		FALSE	TRUE	FALSE
SPBC17A3.06	phosphoprotein phosphatase (predicted)	GO:0019222	regulation of metabolic process	BP	1	0.366599	1	3.51189		FALSE	TRUE	FALSE
SPBC17A3.06	phosphoprotein phosphatase (predicted)	GO:0050794	regulation of cellular process	BP	1	0.507128	1	2.8982		FALSE	TRUE	FALSE
SPBC17A3.06	phosphoprotein phosphatase (predicted)	GO:0010605	negative regulation of macromolecule metabolic process	BP	1	0.262729	1	4.41117		FALSE	TRUE	FALSE
SPBC17A3.06	phosphoprotein phosphatase (predicted)	GO:0006793	phosphorus metabolic process	BP	1	0.10387	1	4.53955		FALSE	TRUE	FALSE
SPBC17A3.06	phosphoprotein phosphatase (predicted)	GO:0006796	phosphate-containing compound metabolic process	BP	1	0.10998	1	4.57439		FALSE	TRUE	FALSE
SPBC17A3.06	phosphoprotein phosphatase (predicted)	GO:0051716	cellular response to stimulus	BP	1	0.13442	1	4.04948		FALSE	TRUE	FALSE
SPBC17A3.06	phosphoprotein phosphatase (predicted)	GO:0010468	regulation of gene expression	BP	1	0.124236	1	3.8283		FALSE	TRUE	FALSE
SPCC962.01	tricalbin, C2 domain protein (phospholipid binding) ER-plasma membrane tethering protein Tcb1 (predicted)	GO:0019222	regulation of metabolic process	BP	1	0.10998	1	3.51189		FALSE	TRUE	FALSE
SPCC962.01	tricalbin, C2 domain protein (phospholipid binding) ER-plasma membrane tethering protein Tcb1 (predicted)	GO:0050794	regulation of cellular process	BP	1	0.307536	1	2.8982		FALSE	TRUE	FALSE
SPCC962.01	tricalbin, C2 domain protein (phospholipid binding) ER-plasma membrane tethering protein Tcb1 (predicted)	GO:0080090	regulation of primary metabolic process	BP	1	0.150713	1	3.74241		FALSE	TRUE	FALSE
SPCC962.01	tricalbin, C2 domain protein (phospholipid binding) ER-plasma membrane tethering protein Tcb1 (predicted)	GO:0031323	regulation of cellular metabolic process	BP	1	0.120163	1	3.69519		FALSE	TRUE	FALSE
SPCC962.01	tricalbin, C2 domain protein (phospholipid binding) ER-plasma membrane tethering protein Tcb1 (predicted)	GO:0016043	cellular component organization	BP	1	0.183299	1	3.17343	curated	FALSE	TRUE	FALSE
SPBP16F5.05c	ribosome biogenesis protein Yar1 (predicted)	GO:0048518	positive regulation of biological process	BP	1	0.317719	1	3.96761		FALSE	FALSE	FALSE
SPBP16F5.05c	ribosome biogenesis protein Yar1 (predicted)	GO:0048522	positive regulation of cellular process	BP	1	0.301426	1	3.98189		FALSE	FALSE	FALSE
SPBP16F5.05c	ribosome biogenesis protein Yar1 (predicted)	GO:0050794	regulation of cellular process	BP	1	0.399185	1	2.8982		FALSE	FALSE	FALSE
SPAC23C4.09c	DNA-binding TFAR19-related protein, human Programmed cell death protein 5 ortholog (predicted)	GO:0090304	nucleic acid metabolic process	BP	1	0.232179	1	3.20299		TRUE	TRUE	TRUE
SPBC25H2.18	cytochrome c oxidase assembly protein Cox20 (predicted)	GO:0019538	protein metabolic process	BP	1	0.203666	1	3.49327		FALSE	TRUE	FALSE
SPBC25H2.18	cytochrome c oxidase assembly protein Cox20 (predicted)	GO:0050794	regulation of cellular process	BP	1	0.10387	1	2.8982		FALSE	TRUE	FALSE
SPAC25B8.04c	mitochondrial Cox1 translation regulator Mss51 (predicted)	GO:0016043	cellular component organization	BP	1	0.197556	1	3.17343		FALSE	FALSE	FALSE
SPBC36.08c	Golgi transport complex subunit Cog2 (predicted)	GO:0050794	regulation of cellular process	BP	1	0.213849	1	2.8982		FALSE	TRUE	FALSE
SPBC887.06c	sorting nexin Snx3 (predicted)	GO:0006996	organelle organization	BP	1	0.14053	1	4.03836		FALSE	TRUE	FALSE
SPBC887.06c	sorting nexin Snx3 (predicted)	GO:0016043	cellular component organization	BP	1	0.397149	1	3.17343		FALSE	TRUE	FALSE
SPBC36.12c	SGT1-like protein Git7	GO:0006950	response to stress	BP	1	0.101833	1	4.13256		FALSE	TRUE	FALSE
SPAC4G9.20c	mitochondrial carrier, glutamate/glycine (predicted)	GO:0098660	inorganic ion transmembrane transport	BP	1	0.101833	1	5.79345		FALSE	TRUE	FALSE
SPAC14C4.16	DASH complex subunit Dad3	GO:0050794	regulation of cellular process	BP	1	0.169043	1	2.8982		FALSE	FALSE	FALSE
SPAC26A3.08	Sm snRNP core protein Smb1	GO:0006396	RNA processing	BP	1	0.234216	1	4.40317	curated	FALSE	TRUE	FALSE
SPAC26A3.08	Sm snRNP core protein Smb1	GO:0006397	mRNA processing	BP	1	0.258656	1	5.63816	curated	FALSE	TRUE	FALSE
SPAC26A3.08	Sm snRNP core protein Smb1	GO:0000377	RNA splicing, via transesterification reactions with bulged adenosine as nucleophile	BP	1	0.293279	1	5.91224	curated	FALSE	TRUE	FALSE
SPAC26A3.08	Sm snRNP core protein Smb1	GO:0016071	mRNA metabolic process	BP	1	0.252546	1	4.88519	curated	FALSE	TRUE	FALSE
SPAC26A3.08	Sm snRNP core protein Smb1	GO:0016070	RNA metabolic process	BP	1	0.329939	1	3.70307	curated	FALSE	TRUE	FALSE
SPAC26A3.08	Sm snRNP core protein Smb1	GO:0008380	RNA splicing	BP	1	0.219959	1	5.87683	curated	FALSE	TRUE	FALSE
SPAC26A3.08	Sm snRNP core protein Smb1	GO:0090304	nucleic acid metabolic process	BP	1	0.315682	1	3.20299	curated	FALSE	TRUE	FALSE
SPAC26A3.08	Sm snRNP core protein Smb1	GO:0000398	mRNA splicing, via spliceosome	BP	1	0.185336	1	5.91224	curated	FALSE	TRUE	FALSE
SPAC26A3.08	Sm snRNP core protein Smb1	GO:0000375	RNA splicing, via transesterification reactions	BP	1	0.268839	1	5.89438	curated	FALSE	TRUE	FALSE
SPBC1778.01c	ribosome-associated chaperone, zuotin (predicted)	GO:0050794	regulation of cellular process	BP	1	0.107943	1	2.8982		FALSE	TRUE	FALSE
SPBC1778.01c	ribosome-associated chaperone, zuotin (predicted)	GO:0060255	regulation of macromolecule metabolic process	BP	1	0.107943	1	3.55445		FALSE	TRUE	FALSE
SPBC21B10.03c	ataxin-2 homolog	GO:0019222	regulation of metabolic process	BP	1	0.226069	1	3.51189		FALSE	TRUE	FALSE
SPBC21B10.03c	ataxin-2 homolog	GO:0060255	regulation of macromolecule metabolic process	BP	1	0.221996	1	3.55445		FALSE	TRUE	FALSE
SPBC21B10.03c	ataxin-2 homolog	GO:0010468	regulation of gene expression	BP	1	0.228106	1	3.8283		FALSE	TRUE	FALSE
SPAC227.05	prefoldin subunit 4, Gim3 (predicted)	GO:0050794	regulation of cellular process	BP	1	0.11609	1	2.8982		FALSE	TRUE	FALSE
SPAC227.05	prefoldin subunit 4, Gim3 (predicted)	GO:0019538	protein metabolic process	BP	1	0.167006	1	3.49327		FALSE	TRUE	FALSE
SPAC19E9.01c	nucleoporin Nup40	GO:0050794	regulation of cellular process	BP	1	0.293279	1	2.8982		FALSE	TRUE	FALSE
SPAC19E9.01c	nucleoporin Nup40	GO:1901990	regulation of mitotic cell cycle phase transition	BP	1	0.14664	1	5.06494		FALSE	TRUE	FALSE
SPAC19E9.01c	nucleoporin Nup40	GO:0010564	regulation of cell cycle process	BP	1	0.11609	1	4.45635		FALSE	TRUE	FALSE
SPAC19E9.01c	nucleoporin Nup40	GO:0051726	regulation of cell cycle	BP	1	0.136456	1	4.33391		FALSE	TRUE	FALSE
SPAC19E9.01c	nucleoporin Nup40	GO:1901987	regulation of cell cycle phase transition	BP	1	0.144603	1	5.005		FALSE	TRUE	FALSE
SPAC19E9.01c	nucleoporin Nup40	GO:0016043	cellular component organization	BP	1	0.203666	1	3.17343		FALSE	TRUE	FALSE
SPAC19E9.01c	nucleoporin Nup40	GO:0006996	organelle organization	BP	1	0.120163	1	4.03836		FALSE	TRUE	FALSE
SPBC20F10.04c	Smc5-6 complex non-SMC delta-kleisin subunit Nse4	GO:0019222	regulation of metabolic process	BP	1	0.187373	1	3.51189		FALSE	TRUE	FALSE
SPBC20F10.04c	Smc5-6 complex non-SMC delta-kleisin subunit Nse4	GO:0060255	regulation of macromolecule metabolic process	BP	1	0.195519	1	3.55445		FALSE	TRUE	FALSE
SPBC20F10.04c	Smc5-6 complex non-SMC delta-kleisin subunit Nse4	GO:0050896	response to stimulus	BP	1	0.340122	1	4.04113	automatic	FALSE	TRUE	FALSE
SPAC22G7.10	mRNA cleavage and polyadenylation specificity factor complex subunit, Fip1 homolog (predicted)	GO:0019222	regulation of metabolic process	BP	1	0.344196	1	3.51189		FALSE	TRUE	FALSE
SPAC22G7.10	mRNA cleavage and polyadenylation specificity factor complex subunit, Fip1 homolog (predicted)	GO:0060255	regulation of macromolecule metabolic process	BP	1	0.311609	1	3.55445		FALSE	TRUE	FALSE
SPAC22G7.10	mRNA cleavage and polyadenylation specificity factor complex subunit, Fip1 homolog (predicted)	GO:0010468	regulation of gene expression	BP	1	0.382892	1	3.8283		FALSE	TRUE	FALSE
SPAC23A1.05	serine palmitoyltransferase subunit A (predicted)	GO:0016043	cellular component organization	BP	1	0.179226	1	3.17343		FALSE	TRUE	FALSE
SPCC790.02	HOPS/CORVET complex subunit, ubiquitin-protein ligase E3 Pep3/Vps18 (predicted)	GO:0006996	organelle organization	BP	1	0.242363	1	4.03836		FALSE	TRUE	FALSE
SPMIT.03	mitochondrial DNA binding endonuclease (predicted)	GO:0016070	RNA metabolic process	BP	1	0.105906	1	3.70307		FALSE	FALSE	FALSE
SPCC1281.02c	splicing factor Spf30 (predicted)	GO:1903047	mitotic cell cycle process	BP	1	0.124236	1	4.2553		FALSE	TRUE	FALSE
SPCC1281.02c	splicing factor Spf30 (predicted)	GO:0048519	negative regulation of biological process	BP	1	0.12831	1	3.83054		FALSE	TRUE	FALSE
SPCC1281.02c	splicing factor Spf30 (predicted)	GO:0022402	cell cycle process	BP	1	0.169043	1	3.7611		FALSE	TRUE	FALSE
SPCC1281.02c	splicing factor Spf30 (predicted)	GO:0048523	negative regulation of cellular process	BP	1	0.142566	1	4.08943		FALSE	TRUE	FALSE
SPCC1281.02c	splicing factor Spf30 (predicted)	GO:0050794	regulation of cellular process	BP	1	0.246436	1	2.8982		FALSE	TRUE	FALSE
SPCC1281.02c	splicing factor Spf30 (predicted)	GO:0009892	negative regulation of metabolic process	BP	1	0.12831	1	4.36986		FALSE	TRUE	FALSE
SPCC1281.02c	splicing factor Spf30 (predicted)	GO:0060255	regulation of macromolecule metabolic process	BP	1	0.152749	1	3.55445		FALSE	TRUE	FALSE
SPCC1281.02c	splicing factor Spf30 (predicted)	GO:0031323	regulation of cellular metabolic process	BP	1	0.10998	1	3.69519		FALSE	TRUE	FALSE
SPCC1281.02c	splicing factor Spf30 (predicted)	GO:0051171	regulation of nitrogen compound metabolic process	BP	1	0.120163	1	3.77908		FALSE	TRUE	FALSE
SPCC1281.02c	splicing factor Spf30 (predicted)	GO:0019222	regulation of metabolic process	BP	1	0.112016	1	3.51189		FALSE	TRUE	FALSE
SPCC1281.02c	splicing factor Spf30 (predicted)	GO:0080090	regulation of primary metabolic process	BP	1	0.112016	1	3.74241		FALSE	TRUE	FALSE
SPCC1281.02c	splicing factor Spf30 (predicted)	GO:0010605	negative regulation of macromolecule metabolic process	BP	1	0.11609	1	4.41117		FALSE	TRUE	FALSE
SPAC25G10.01	RNA-binding protein involved in histone acetylation	GO:0006396	RNA processing	BP	1	0.405295	1	4.40317		FALSE	TRUE	FALSE
SPAC25G10.01	RNA-binding protein involved in histone acetylation	GO:0016070	RNA metabolic process	BP	1	0.439919	1	3.70307		FALSE	TRUE	FALSE
SPAC25G10.01	RNA-binding protein involved in histone acetylation	GO:0090304	nucleic acid metabolic process	BP	1	0.462322	1	3.20299		FALSE	TRUE	FALSE
SPBC651.09c	RNA polymerase II associated Paf1 complex (predicted)	GO:0050794	regulation of cellular process	BP	1	0.450102	1	2.8982		FALSE	TRUE	FALSE
SPCC613.12c	CLRC ubiquitin ligase complex WD repeat subunit Raf1/Dos1	GO:0034613	cellular protein localization	BP	1	0.120163	1	4.47758	experimental	FALSE	FALSE	FALSE
SPAC3G6.02	multifunctional proteasome assembly, lid subcomplex subunit Rpn15/Dss1	GO:0048518	positive regulation of biological process	BP	1	0.242363	1	3.96761		FALSE	TRUE	FALSE
SPAC3G6.02	multifunctional proteasome assembly, lid subcomplex subunit Rpn15/Dss1	GO:0048522	positive regulation of cellular process	BP	1	0.321792	1	3.98189		FALSE	TRUE	FALSE
SPAC3G6.02	multifunctional proteasome assembly, lid subcomplex subunit Rpn15/Dss1	GO:0050794	regulation of cellular process	BP	1	0.352342	1	2.8982		FALSE	TRUE	FALSE
SPAC3G6.02	multifunctional proteasome assembly, lid subcomplex subunit Rpn15/Dss1	GO:0051234	establishment of localization	BP	1	0.169043	1	3.47657	automatic	FALSE	TRUE	FALSE
SPAC3G6.02	multifunctional proteasome assembly, lid subcomplex subunit Rpn15/Dss1	GO:0006810	transport	BP	1	0.162933	1	3.50456	automatic	FALSE	TRUE	FALSE
SPAC3G6.02	multifunctional proteasome assembly, lid subcomplex subunit Rpn15/Dss1	GO:0051179	localization	BP	1	0.162933	1	3.1988	automatic	FALSE	TRUE	FALSE
SPBC1709.10c	copper chaperone Atx1	GO:0051234	establishment of localization	BP	1	0.228106	1	3.47657	experimental	FALSE	TRUE	FALSE
SPBC1709.10c	copper chaperone Atx1	GO:0006810	transport	BP	1	0.252546	1	3.50456	experimental	FALSE	TRUE	FALSE
SPBC1709.10c	copper chaperone Atx1	GO:0006811	ion transport	BP	1	0.124236	1	4.86602	experimental	FALSE	TRUE	FALSE
SPBC1709.10c	copper chaperone Atx1	GO:0051179	localization	BP	1	0.303462	1	3.1988	experimental	FALSE	TRUE	FALSE
SPBC1604.16c	RNA-binding protein, G-patch type, human GPANK1 ortholog	GO:0050794	regulation of cellular process	BP	1	0.283096	1	2.8982		TRUE	TRUE	TRUE
SPAC890.05	ribosome biogenesis protein, G-patch domain, PINX1 family Pxr1 (predicted)	GO:0050794	regulation of cellular process	BP	1	0.160896	1	2.8982		FALSE	TRUE	FALSE
SPAP14E8.03	SNARE Bos1 (predicted)	GO:0061024	membrane organization	BP	1	0.12831	1	5.68012		FALSE	TRUE	FALSE
SPAP14E8.03	SNARE Bos1 (predicted)	GO:0006996	organelle organization	BP	1	0.187373	1	4.03836		FALSE	TRUE	FALSE
SPAP14E8.03	SNARE Bos1 (predicted)	GO:0016043	cellular component organization	BP	1	0.291242	1	3.17343		FALSE	TRUE	FALSE
SPBC1711.07	WD repeat protein Rrb1 (predicted)	GO:0006396	RNA processing	BP	1	0.276986	1	4.40317		FALSE	TRUE	FALSE
SPBC1711.07	WD repeat protein Rrb1 (predicted)	GO:0034470	ncRNA processing	BP	1	0.352342	1	4.85971		FALSE	TRUE	FALSE
SPBC1711.07	WD repeat protein Rrb1 (predicted)	GO:0016070	RNA metabolic process	BP	1	0.433809	1	3.70307		FALSE	TRUE	FALSE
SPBC1711.07	WD repeat protein Rrb1 (predicted)	GO:0016072	rRNA metabolic process	BP	1	0.309572	1	5.21012		FALSE	TRUE	FALSE
SPBC1711.07	WD repeat protein Rrb1 (predicted)	GO:0034660	ncRNA metabolic process	BP	1	0.352342	1	4.55334		FALSE	TRUE	FALSE
SPBC1711.07	WD repeat protein Rrb1 (predicted)	GO:0090304	nucleic acid metabolic process	BP	1	0.427699	1	3.20299		FALSE	TRUE	FALSE
SPBC1711.07	WD repeat protein Rrb1 (predicted)	GO:0060255	regulation of macromolecule metabolic process	BP	1	0.10387	1	3.55445		FALSE	TRUE	FALSE
SPBC1711.07	WD repeat protein Rrb1 (predicted)	GO:0031323	regulation of cellular metabolic process	BP	1	0.10998	1	3.69519		FALSE	TRUE	FALSE
SPBC1711.07	WD repeat protein Rrb1 (predicted)	GO:0010468	regulation of gene expression	BP	1	0.120163	1	3.8283		FALSE	TRUE	FALSE
SPBC1711.07	WD repeat protein Rrb1 (predicted)	GO:0019222	regulation of metabolic process	BP	1	0.107943	1	3.51189		FALSE	TRUE	FALSE
SPBC1711.07	WD repeat protein Rrb1 (predicted)	GO:0050794	regulation of cellular process	BP	1	0.181263	1	2.8982		FALSE	TRUE	FALSE
SPBC337.03	RNA polymerase II transcription termination factor homolog	GO:0006396	RNA processing	BP	1	0.158859	1	4.40317		FALSE	TRUE	FALSE
SPAC4G8.10	SNARE Gos1 (predicted)	GO:0006996	organelle organization	BP	1	0.154786	1	4.03836		FALSE	TRUE	FALSE
SPBC14F5.10c	ubiquitin-protein ligase E3, unknown biological role, implicated in protein catabolic process (predicted)	GO:0070647	protein modification by small protein conjugation or removal	BP	1	0.132383	1	5.28905	curated	TRUE	TRUE	TRUE
SPBC3D6.11c	SUMO-targeted ubiquitin-protein ligase E3 Slx8	GO:0006464	cellular protein modification process	BP	1	0.784114	1	4.25702	experimental	FALSE	TRUE	FALSE
SPBC3D6.11c	SUMO-targeted ubiquitin-protein ligase E3 Slx8	GO:0036211	protein modification process	BP	1	0.676171	1	4.25702	experimental	FALSE	TRUE	FALSE
SPBC3D6.11c	SUMO-targeted ubiquitin-protein ligase E3 Slx8	GO:0043412	macromolecule modification	BP	1	0.696538	1	4.03422	experimental	FALSE	TRUE	FALSE
SPBC3D6.11c	SUMO-targeted ubiquitin-protein ligase E3 Slx8	GO:0044267	cellular protein metabolic process	BP	1	0.653768	1	3.76847	experimental	FALSE	TRUE	FALSE
SPBC3D6.11c	SUMO-targeted ubiquitin-protein ligase E3 Slx8	GO:0070647	protein modification by small protein conjugation or removal	BP	1	0.221996	1	5.28905	experimental	FALSE	TRUE	FALSE
SPBC16G5.03	ubiquitin-protein ligase E3/SUMO transferase, Topors, possibly associated with DNA damage (predicted)	GO:0060255	regulation of macromolecule metabolic process	BP	1	0.112016	1	3.55445		FALSE	FALSE	FALSE
SPBC16G5.03	ubiquitin-protein ligase E3/SUMO transferase, Topors, possibly associated with DNA damage (predicted)	GO:0051252	regulation of RNA metabolic process	BP	1	0.112016	1	4.14479		FALSE	FALSE	FALSE
SPBC16G5.03	ubiquitin-protein ligase E3/SUMO transferase, Topors, possibly associated with DNA damage (predicted)	GO:0019222	regulation of metabolic process	BP	1	0.144603	1	3.51189		FALSE	FALSE	FALSE
SPBC16G5.03	ubiquitin-protein ligase E3/SUMO transferase, Topors, possibly associated with DNA damage (predicted)	GO:0050794	regulation of cellular process	BP	1	0.254582	1	2.8982		FALSE	FALSE	FALSE
SPBC16G5.03	ubiquitin-protein ligase E3/SUMO transferase, Topors, possibly associated with DNA damage (predicted)	GO:0080090	regulation of primary metabolic process	BP	1	0.14053	1	3.74241		FALSE	FALSE	FALSE
SPBC16G5.03	ubiquitin-protein ligase E3/SUMO transferase, Topors, possibly associated with DNA damage (predicted)	GO:0009889	regulation of biosynthetic process	BP	1	0.124236	1	3.91981		FALSE	FALSE	FALSE
SPBC16G5.03	ubiquitin-protein ligase E3/SUMO transferase, Topors, possibly associated with DNA damage (predicted)	GO:0031326	regulation of cellular biosynthetic process	BP	1	0.101833	1	3.91981		FALSE	FALSE	FALSE
SPBC16G5.03	ubiquitin-protein ligase E3/SUMO transferase, Topors, possibly associated with DNA damage (predicted)	GO:0070647	protein modification by small protein conjugation or removal	BP	1	0.112016	1	5.28905	curated	FALSE	FALSE	FALSE
SPAC10F6.04	RCC domain protein Ats1 (predicted)	GO:0050896	response to stimulus	BP	1	0.162933	1	4.04113		FALSE	TRUE	FALSE
SPAC227.15	protein phosphatase regulatory subunit Reg1 (predicted)	GO:0031323	regulation of cellular metabolic process	BP	1	0.211813	1	3.69519		FALSE	FALSE	FALSE
SPAC227.15	protein phosphatase regulatory subunit Reg1 (predicted)	GO:0050794	regulation of cellular process	BP	1	0.329939	1	2.8982		FALSE	FALSE	FALSE
SPAC227.15	protein phosphatase regulatory subunit Reg1 (predicted)	GO:0051171	regulation of nitrogen compound metabolic process	BP	1	0.138493	1	3.77908		FALSE	FALSE	FALSE
SPAC227.15	protein phosphatase regulatory subunit Reg1 (predicted)	GO:0060255	regulation of macromolecule metabolic process	BP	1	0.148676	1	3.55445		FALSE	FALSE	FALSE
SPAC2E1P5.04c	geranylgeranyltransferase I beta subunit Cwg2	GO:0005515	protein binding	MF	1	0.142566	1	2.77713	experimental	FALSE	TRUE	FALSE
SPBC216.07c	serine/threonine protein kinase Tor2	GO:0097159	organic cyclic compound binding	MF	1	0.154786	1	3.00401	automatic	FALSE	TRUE	FALSE
SPBC216.07c	serine/threonine protein kinase Tor2	GO:1901363	heterocyclic compound binding	MF	1	0.138493	1	3.00894	automatic	FALSE	TRUE	FALSE
SPBC216.07c	serine/threonine protein kinase Tor2	GO:0003676	nucleic acid binding	MF	1	0.138493	1	3.50537		FALSE	TRUE	FALSE
SPCC548.06c	plasma membrane hexose:proton symporter, unknown specificity Ght8 (predicted)	GO:0005215	transporter activity	MF	1	0.731161	1	4.67635	automatic	FALSE	FALSE	FALSE
SPCC548.06c	plasma membrane hexose:proton symporter, unknown specificity Ght8 (predicted)	GO:0022857	transmembrane transporter activity	MF	1	0.596741	1	4.81063	automatic	FALSE	FALSE	FALSE
SPAC56E4.03	aromatic aminotransferase (predicted)	GO:0016740	transferase activity	MF	1	0.248473	1	3.34383	automatic	FALSE	TRUE	FALSE
SPAC977.09c	phospholipase (predicted)	GO:0016787	hydrolase activity	MF	1	0.126273	1	2.76506	automatic	FALSE	TRUE	FALSE
SPBC1348.10c	phospholipase (predicted)	GO:0016788	hydrolase activity, acting on ester bonds	MF	1	0.114053	1	4.6816	automatic	FALSE	TRUE	FALSE
SPBC1348.10c	phospholipase (predicted)	GO:0016787	hydrolase activity	MF	1	0.144603	1	2.76506	automatic	FALSE	TRUE	FALSE
SPCC1672.10	kinetochore protein Mis16	GO:0005515	protein binding	MF	1	0.142566	1	2.77713	experimental	FALSE	TRUE	FALSE
SPAC4F8.15	myo-inositol transmembrane transporter Itr1	GO:0022857	transmembrane transporter activity	MF	1	0.686354	1	4.81063	automatic	FALSE	TRUE	FALSE
SPAC4F8.15	myo-inositol transmembrane transporter Itr1	GO:0005215	transporter activity	MF	1	0.796334	1	4.67635	automatic	FALSE	TRUE	FALSE
SPAC4F8.15	myo-inositol transmembrane transporter Itr1	GO:0015318	inorganic molecular entity transmembrane transporter activity	MF	1	0.488798	1	5.39602		FALSE	TRUE	FALSE
SPBC1271.10c	transmembrane transporter (predicted)	GO:0022857	transmembrane transporter activity	MF	1	0.413442	1	4.81063	curated	FALSE	FALSE	FALSE
SPBC1271.10c	transmembrane transporter (predicted)	GO:0015318	inorganic molecular entity transmembrane transporter activity	MF	1	0.126273	1	5.39602		FALSE	FALSE	FALSE
SPBC1271.10c	transmembrane transporter (predicted)	GO:0015075	ion transmembrane transporter activity	MF	1	0.321792	1	5.26518		FALSE	FALSE	FALSE
SPBC1271.10c	transmembrane transporter (predicted)	GO:0008324	cation transmembrane transporter activity	MF	1	0.189409	1	5.72393		FALSE	FALSE	FALSE
SPBC1773.13	aromatic aminotransferase (predicted)	GO:0016740	transferase activity	MF	1	0.238289	1	3.34383	automatic	FALSE	TRUE	FALSE
SPBC1683.08	plasma membrane hexose:proton symporter, unknown specificity Ght4	GO:0005215	transporter activity	MF	1	0.737271	1	4.67635	automatic	FALSE	FALSE	FALSE
SPBC1683.08	plasma membrane hexose:proton symporter, unknown specificity Ght4	GO:0022857	transmembrane transporter activity	MF	1	0.641548	1	4.81063	automatic	FALSE	FALSE	FALSE
SPCC569.07	aromatic aminotransferase (predicted)	GO:0016740	transferase activity	MF	1	0.228106	1	3.34383	automatic	FALSE	TRUE	FALSE
SPBPJ4664.04	coatomer alpha subunit Cop1 (predicted)	GO:0005515	protein binding	MF	1	0.276986	1	2.77713		FALSE	TRUE	FALSE
SPBC1348.05	transmembrane transporter (predicted)	GO:0015075	ion transmembrane transporter activity	MF	1	0.297352	1	5.26518		FALSE	FALSE	FALSE
SPBC1348.05	transmembrane transporter (predicted)	GO:0015318	inorganic molecular entity transmembrane transporter activity	MF	1	0.276986	1	5.39602		FALSE	FALSE	FALSE
SPBC1348.05	transmembrane transporter (predicted)	GO:0008324	cation transmembrane transporter activity	MF	1	0.539715	1	5.72393		FALSE	FALSE	FALSE
SPBC1348.05	transmembrane transporter (predicted)	GO:0022857	transmembrane transporter activity	MF	1	0.317719	1	4.81063		FALSE	FALSE	FALSE
SPBC1348.05	transmembrane transporter (predicted)	GO:0005215	transporter activity	MF	1	0.92668	1	4.67635		FALSE	FALSE	FALSE
SPBPB2B2.16c	transmembrane transporter (predicted)	GO:0015075	ion transmembrane transporter activity	MF	1	0.291242	1	5.26518		FALSE	FALSE	FALSE
SPBPB2B2.16c	transmembrane transporter (predicted)	GO:0015318	inorganic molecular entity transmembrane transporter activity	MF	1	0.132383	1	5.39602		FALSE	FALSE	FALSE
SPBPB2B2.16c	transmembrane transporter (predicted)	GO:0008324	cation transmembrane transporter activity	MF	1	0.533605	1	5.72393		FALSE	FALSE	FALSE
SPBPB2B2.16c	transmembrane transporter (predicted)	GO:0022857	transmembrane transporter activity	MF	1	0.433809	1	4.81063	curated	FALSE	FALSE	FALSE
SPAC750.02c	transmembrane transporter (predicted)	GO:0015075	ion transmembrane transporter activity	MF	1	0.437882	1	5.26518		FALSE	FALSE	FALSE
SPAC750.02c	transmembrane transporter (predicted)	GO:0015318	inorganic molecular entity transmembrane transporter activity	MF	1	0.386965	1	5.39602		FALSE	FALSE	FALSE
SPAC750.02c	transmembrane transporter (predicted)	GO:0008324	cation transmembrane transporter activity	MF	1	0.615071	1	5.72393		FALSE	FALSE	FALSE
SPAC750.02c	transmembrane transporter (predicted)	GO:0022857	transmembrane transporter activity	MF	1	0.588595	1	4.81063	curated	FALSE	FALSE	FALSE
SPAC29A4.18	Clr6 histone deacetylase complex subunit Prw1	GO:0005515	protein binding	MF	1	0.162933	1	2.77713	experimental	FALSE	TRUE	FALSE
SPCC1450.09c	phospholipase (predicted)	GO:0016787	hydrolase activity	MF	1	0.193483	1	2.76506	automatic	FALSE	TRUE	FALSE
SPBC577.15c	NASP family CENP-A chaperone	GO:0005515	protein binding	MF	1	0.189409	1	2.77713	experimental	FALSE	TRUE	FALSE
SPBC4F6.06	microtubule affinity-regulating kinase Kin1	GO:0005515	protein binding	MF	1	0.118126	1	2.77713	experimental	FALSE	TRUE	FALSE
SPBC21B10.05c	WD repeat protein Pop3	GO:0005515	protein binding	MF	1	0.248473	1	2.77713	experimental	FALSE	TRUE	FALSE
SPBC16A3.05c	RNA export factor, nucleoporin Rae1	GO:0005515	protein binding	MF	1	0.105906	1	2.77713	experimental	FALSE	TRUE	FALSE
SPAC1786.02	phospholipase (predicted)	GO:0016788	hydrolase activity, acting on ester bonds	MF	1	0.105906	1	4.6816	automatic	FALSE	TRUE	FALSE
SPAC1786.02	phospholipase (predicted)	GO:0016787	hydrolase activity	MF	1	0.120163	1	2.76506	automatic	FALSE	TRUE	FALSE
SPAC1834.07	kinesin-like protein Klp3	GO:0005515	protein binding	MF	1	0.590631	1	2.77713	experimental	FALSE	TRUE	FALSE
SPBC418.01c	imidazoleglycerol-phosphate synthase His4	GO:0016787	hydrolase activity	MF	1	0.191446	1	2.76506		FALSE	FALSE	FALSE
SPAC1F7.12	aldose reductase ARK13 family YakC, implicated in cellular detoxification from family members	GO:0016614	oxidoreductase activity, acting on CH-OH group of donors	MF	1	0.397149	1	6.00665	experimental	FALSE	FALSE	TRUE
SPAC821.06	mitotic and meiotic (sporulation) septin Spn2	GO:0005515	protein binding	MF	1	0.124236	1	2.77713	experimental	FALSE	TRUE	FALSE
SPBC18H10.08c	ubiquitin C-terminal hydrolase Ubp4	GO:0005515	protein binding	MF	1	0.10387	1	2.77713	experimental	FALSE	TRUE	FALSE
SPBC3E7.10	methionine aminopeptidase Fma1 (predicted)	GO:1901363	heterocyclic compound binding	MF	1	0.224033	1	3.00894		FALSE	TRUE	FALSE
SPBC3E7.10	methionine aminopeptidase Fma1 (predicted)	GO:0097159	organic cyclic compound binding	MF	1	0.242363	1	3.00401		FALSE	TRUE	FALSE
SPBC3E7.10	methionine aminopeptidase Fma1 (predicted)	GO:0003676	nucleic acid binding	MF	1	0.144603	1	3.50537		FALSE	TRUE	FALSE
SPAC3G9.06	cytoplasmic phenylalanine-tRNA ligase alpha subunit Frs2 (predicted)	GO:0016787	hydrolase activity	MF	1	0.154786	1	2.76506		FALSE	TRUE	FALSE
SPCC1529.01	transmembrane transporter (predicted)	GO:0022857	transmembrane transporter activity	MF	1	0.633401	1	4.81063	curated	FALSE	FALSE	FALSE
SPCC777.03c	nifs homolog, possible cysteine desulfurase	GO:0016829	lyase activity	MF	1	0.12831	1	5.93964		FALSE	FALSE	TRUE
SPBC29A10.10c	ATP-dependent RNA helicase Dbl8	GO:0140097	catalytic activity, acting on DNA	MF	1	0.452138	1	5.46271		FALSE	TRUE	FALSE
SPCC1620.04c	meiotic fizzy-related APC coactivator Fzr3	GO:0098772	molecular function regulator	MF	1	0.276986	1	5.17073	automatic	FALSE	FALSE	FALSE
SPCC1620.04c	meiotic fizzy-related APC coactivator Fzr3	GO:0030234	enzyme regulator activity	MF	1	0.228106	1	5.38532	automatic	FALSE	FALSE	FALSE
SPBC6B1.10	Prp19 complex WD repeat protein Prp17	GO:0005515	protein binding	MF	1	0.14053	1	2.77713		FALSE	TRUE	FALSE
SPAC11D3.10	nifs homolog, possible cysteine desulfurase	GO:0016829	lyase activity	MF	1	0.201629	1	5.93964		FALSE	FALSE	TRUE
SPBC16C6.13c	coatomer beta' subunit (predicted)	GO:0005515	protein binding	MF	1	0.187373	1	2.77713		FALSE	TRUE	FALSE
SPAC9G1.11c	mitotic septin Spn4	GO:0005515	protein binding	MF	1	0.185336	1	2.77713	experimental	FALSE	FALSE	FALSE
SPBC557.04	Ark1/Prk1 family protein kinase Ppk29	GO:0005515	protein binding	MF	1	0.10387	1	2.77713		FALSE	TRUE	FALSE
SPAC22G7.01c	iron responsive transcriptional regulator, peptidase family (predicted)	GO:0140096	catalytic activity, acting on a protein	MF	1	0.215886	1	2.73945	automatic	FALSE	TRUE	FALSE
SPAC22G7.01c	iron responsive transcriptional regulator, peptidase family (predicted)	GO:0008233	peptidase activity	MF	1	0.272912	1	3.17927	automatic	FALSE	TRUE	FALSE
SPAC22G7.01c	iron responsive transcriptional regulator, peptidase family (predicted)	GO:0070011	peptidase activity, acting on L-amino acid peptides	MF	1	0.311609	1	3.18574	automatic	FALSE	TRUE	FALSE
SPAC22G7.01c	iron responsive transcriptional regulator, peptidase family (predicted)	GO:0016787	hydrolase activity	MF	1	0.327902	1	2.76506	automatic	FALSE	TRUE	FALSE
SPBC1683.04	glycosyl hydrolase family 3 (predicted)	GO:0016787	hydrolase activity	MF	1	0.301426	1	2.76506	automatic	FALSE	FALSE	FALSE
SPAC16C9.02c	S-methyl-5-thioadenosine phosphorylase (predicted)	GO:1901363	heterocyclic compound binding	MF	1	0.10387	1	3.00894		FALSE	TRUE	FALSE
SPAC16C9.02c	S-methyl-5-thioadenosine phosphorylase (predicted)	GO:0097159	organic cyclic compound binding	MF	1	0.107943	1	3.00401		FALSE	TRUE	FALSE
SPBC31F10.13c	histone H3.3 H4 chaperone, hira family Hip1	GO:0005515	protein binding	MF	1	0.167006	1	2.77713	experimental	FALSE	TRUE	FALSE
SPAC9G1.05	actin binding WD repeat protein Aip1	GO:0005515	protein binding	MF	1	0.181263	1	2.77713		FALSE	TRUE	FALSE
SPBC713.05	WD repeat protein, human MAPK organizer 1 (MORG1) family Wdr83 (predicted)	GO:0005515	protein binding	MF	1	0.211813	1	2.77713		FALSE	TRUE	FALSE
SPAPB1A10.04c	geranylgeranyltransferase I and farnesyltransferase alpha subunit Cwp1	GO:0005515	protein binding	MF	1	0.177189	1	2.77713	experimental	FALSE	TRUE	FALSE
SPBC2G2.08	C-1-tetrahydrofolatesynthase/methylenetetrahydrof olatedehydrogenase/methylenetetrahydrofolatecyclohydrolase/ formyltetrahydrofolatesynthetase Ade9	GO:0003677	DNA binding	MF	1	0.144603	1	4.46903		FALSE	TRUE	FALSE
SPBC2G2.08	C-1-tetrahydrofolatesynthase/methylenetetrahydrof olatedehydrogenase/methylenetetrahydrofolatecyclohydrolase/ formyltetrahydrofolatesynthetase Ade9	GO:0003676	nucleic acid binding	MF	1	0.152749	1	3.50537		FALSE	TRUE	FALSE
SPAC1093.05	ATP-dependent RNA helicase Hca4 (predicted)	GO:1901363	heterocyclic compound binding	MF	1	0.686354	1	3.00894	automatic	FALSE	TRUE	FALSE
SPAC1093.05	ATP-dependent RNA helicase Hca4 (predicted)	GO:0097159	organic cyclic compound binding	MF	1	0.613035	1	3.00401	automatic	FALSE	TRUE	FALSE
SPAC1093.05	ATP-dependent RNA helicase Hca4 (predicted)	GO:0003676	nucleic acid binding	MF	1	0.252546	1	3.50537		FALSE	TRUE	FALSE
SPBC1709.06	tRNA dihydrouridine synthase Dus2 (predicted)	GO:0140098	catalytic activity, acting on RNA	MF	1	0.12831	1	5.02705	automatic	FALSE	TRUE	FALSE
SPBC12D12.05c	mitochondrial carrier, ATP:ADP antiporter (predicted)	GO:0008324	cation transmembrane transporter activity	MF	1	0.209776	1	5.72393		FALSE	TRUE	FALSE
SPAC688.10	DNA polymerase zeta catalytic subunit Rev3 (predicted)	GO:0016740	transferase activity	MF	1	0.309572	1	3.34383		FALSE	TRUE	FALSE
SPAC688.10	DNA polymerase zeta catalytic subunit Rev3 (predicted)	GO:0140097	catalytic activity, acting on DNA	MF	1	0.439919	1	5.46271		FALSE	TRUE	FALSE
SPAC688.10	DNA polymerase zeta catalytic subunit Rev3 (predicted)	GO:0016772	transferase activity, transferring phosphorus-containing groups	MF	1	0.281059	1	3.90155		FALSE	TRUE	FALSE
SPCC663.08c	short chain dehydrogenase, unknown specificity (predicted)	GO:0016491	oxidoreductase activity	MF	1	0.279022	1	4.6505	curated	FALSE	FALSE	FALSE
SPCC663.08c	short chain dehydrogenase, unknown specificity (predicted)	GO:0016616	oxidoreductase activity, acting on the CH-OH group of donors, NAD or NADP as acceptor	MF	1	0.268839	1	6.09998		FALSE	FALSE	FALSE
SPCC663.08c	short chain dehydrogenase, unknown specificity (predicted)	GO:0016614	oxidoreductase activity, acting on CH-OH group of donors	MF	1	0.250509	1	6.00665		FALSE	FALSE	FALSE
SPCC663.06c	short chain dehydrogenase, unknown specificity (predicted)	GO:0016491	oxidoreductase activity	MF	1	0.419552	1	4.6505	curated	FALSE	FALSE	FALSE
SPCC663.06c	short chain dehydrogenase, unknown specificity (predicted)	GO:0016616	oxidoreductase activity, acting on the CH-OH group of donors, NAD or NADP as acceptor	MF	1	0.274949	1	6.09998		FALSE	FALSE	FALSE
SPCC663.06c	short chain dehydrogenase, unknown specificity (predicted)	GO:0016614	oxidoreductase activity, acting on CH-OH group of donors	MF	1	0.260692	1	6.00665		FALSE	FALSE	FALSE
SPAC222.14c	GTP binding protein Sey1 (predicted)	GO:0017111	nucleoside-triphosphatase activity	MF	1	0.118126	1	5.2236	automatic	FALSE	FALSE	FALSE
SPAC222.14c	GTP binding protein Sey1 (predicted)	GO:0016817	hydrolase activity, acting on acid anhydrides	MF	1	0.150713	1	5.01965	automatic	FALSE	FALSE	FALSE
SPAC977.17	MIP water channel (predicted)	GO:0015318	inorganic molecular entity transmembrane transporter activity	MF	1	0.154786	1	5.39602		FALSE	TRUE	FALSE
SPAC977.17	MIP water channel (predicted)	GO:0022857	transmembrane transporter activity	MF	1	0.195519	1	4.81063	automatic	FALSE	TRUE	FALSE
SPAC977.17	MIP water channel (predicted)	GO:0005215	transporter activity	MF	1	0.266802	1	4.67635	automatic	FALSE	TRUE	FALSE
SPBPB10D8.07c	transmembrane transporter (predicted)	GO:0008324	cation transmembrane transporter activity	MF	1	0.126273	1	5.72393		FALSE	FALSE	FALSE
SPBPB10D8.07c	transmembrane transporter (predicted)	GO:0022890	inorganic cation transmembrane transporter activity	MF	1	0.10998	1	6.21505		FALSE	FALSE	FALSE
SPBPB10D8.07c	transmembrane transporter (predicted)	GO:0005342	organic acid transmembrane transporter activity	MF	1	0.164969	1	6.25232		FALSE	FALSE	FALSE
SPBPB10D8.07c	transmembrane transporter (predicted)	GO:0015075	ion transmembrane transporter activity	MF	1	0.177189	1	5.26518		FALSE	FALSE	FALSE
SPBPB10D8.07c	transmembrane transporter (predicted)	GO:0022804	active transmembrane transporter activity	MF	1	0.112016	1	6.21505		FALSE	FALSE	FALSE
SPBPB10D8.07c	transmembrane transporter (predicted)	GO:0008509	anion transmembrane transporter activity	MF	1	0.101833	1	5.93042		FALSE	FALSE	FALSE
SPBPB10D8.07c	transmembrane transporter (predicted)	GO:0022857	transmembrane transporter activity	MF	1	0.167006	1	4.81063	curated	FALSE	FALSE	FALSE
SPBPB10D8.07c	transmembrane transporter (predicted)	GO:0008514	organic anion transmembrane transporter activity	MF	1	0.175153	1	6.06789		FALSE	FALSE	FALSE
SPCC31H12.07	COPII cargo receptor subunit Sec23a (predicted)	GO:0005515	protein binding	MF	1	0.126273	1	2.77713		FALSE	TRUE	FALSE
SPBC1683.03c	transmembrane transporter (predicted)	GO:0008324	cation transmembrane transporter activity	MF	1	0.101833	1	5.72393		FALSE	FALSE	FALSE
SPBC1683.03c	transmembrane transporter (predicted)	GO:0015075	ion transmembrane transporter activity	MF	1	0.205703	1	5.26518		FALSE	FALSE	FALSE
SPBC1683.03c	transmembrane transporter (predicted)	GO:0022857	transmembrane transporter activity	MF	1	0.289206	1	4.81063	curated	FALSE	FALSE	FALSE
SPCC663.09c	short chain dehydrogenase, unknown specificity (predicted)	GO:0016491	oxidoreductase activity	MF	1	0.342159	1	4.6505	curated	FALSE	FALSE	FALSE
SPCC663.09c	short chain dehydrogenase, unknown specificity (predicted)	GO:0016616	oxidoreductase activity, acting on the CH-OH group of donors, NAD or NADP as acceptor	MF	1	0.191446	1	6.09998		FALSE	FALSE	FALSE
SPCC663.09c	short chain dehydrogenase, unknown specificity (predicted)	GO:0016614	oxidoreductase activity, acting on CH-OH group of donors	MF	1	0.366599	1	6.00665		FALSE	FALSE	FALSE
SPAC1834.02	pentafunctional aromatic polypeptide Aro1 (predicted)	GO:0016829	lyase activity	MF	1	0.138493	1	5.93964	automatic	FALSE	FALSE	FALSE
SPAC1834.02	pentafunctional aromatic polypeptide Aro1 (predicted)	GO:0016491	oxidoreductase activity	MF	1	0.11609	1	4.6505	automatic	FALSE	FALSE	FALSE
SPAC1834.02	pentafunctional aromatic polypeptide Aro1 (predicted)	GO:0016740	transferase activity	MF	1	0.276986	1	3.34383	automatic	FALSE	FALSE	FALSE
SPCC24B10.20	short chain dehydrogenase, unknown specificity (predicted)	GO:0016491	oxidoreductase activity	MF	1	0.156823	1	4.6505	curated	FALSE	FALSE	FALSE
SPCC24B10.20	short chain dehydrogenase, unknown specificity (predicted)	GO:0016616	oxidoreductase activity, acting on the CH-OH group of donors, NAD or NADP as acceptor	MF	1	0.338086	1	6.09998		FALSE	FALSE	FALSE
SPCC24B10.20	short chain dehydrogenase, unknown specificity (predicted)	GO:0016614	oxidoreductase activity, acting on CH-OH group of donors	MF	1	0.382892	1	6.00665		FALSE	FALSE	FALSE
SPCC1494.05c	CSN-associated deubiquitinating enzyme Ubp12	GO:0016787	hydrolase activity	MF	1	0.366599	1	2.76506	experimental	FALSE	TRUE	FALSE
SPCC1494.05c	CSN-associated deubiquitinating enzyme Ubp12	GO:0140096	catalytic activity, acting on a protein	MF	1	0.342159	1	2.73945	experimental	FALSE	TRUE	FALSE
SPCC1494.05c	CSN-associated deubiquitinating enzyme Ubp12	GO:0008233	peptidase activity	MF	1	0.466395	1	3.17927	experimental	FALSE	TRUE	FALSE
SPCC1494.05c	CSN-associated deubiquitinating enzyme Ubp12	GO:0070011	peptidase activity, acting on L-amino acid peptides	MF	1	0.439919	1	3.18574	experimental	FALSE	TRUE	FALSE
SPBC1683.01	inorganic phosphate transmembrane transporter (predicted)	GO:0008324	cation transmembrane transporter activity	MF	1	0.138493	1	5.72393		FALSE	FALSE	FALSE
SPBC1683.01	inorganic phosphate transmembrane transporter (predicted)	GO:0015075	ion transmembrane transporter activity	MF	1	0.219959	1	5.26518		FALSE	FALSE	FALSE
SPBC1683.01	inorganic phosphate transmembrane transporter (predicted)	GO:0008509	anion transmembrane transporter activity	MF	1	0.150713	1	5.93042		FALSE	FALSE	FALSE
SPBC8E4.01c	inorganic phosphate transmembrane transporter (predicted)	GO:0008324	cation transmembrane transporter activity	MF	1	0.164969	1	5.72393		FALSE	FALSE	FALSE
SPBC8E4.01c	inorganic phosphate transmembrane transporter (predicted)	GO:0015075	ion transmembrane transporter activity	MF	1	0.181263	1	5.26518		FALSE	FALSE	FALSE
SPBC8E4.01c	inorganic phosphate transmembrane transporter (predicted)	GO:0008509	anion transmembrane transporter activity	MF	1	0.13442	1	5.93042		FALSE	FALSE	FALSE
SPAC23D3.12	plasma membrane inorganic phosphate transmembrane transporter (predicted)	GO:0008324	cation transmembrane transporter activity	MF	1	0.118126	1	5.72393		FALSE	FALSE	FALSE
SPAC23D3.12	plasma membrane inorganic phosphate transmembrane transporter (predicted)	GO:0015075	ion transmembrane transporter activity	MF	1	0.173116	1	5.26518		FALSE	FALSE	FALSE
SPAC23D3.12	plasma membrane inorganic phosphate transmembrane transporter (predicted)	GO:0008509	anion transmembrane transporter activity	MF	1	0.179226	1	5.93042		FALSE	FALSE	FALSE
SPACUNK4.12c	insulinase pombe homologue 1	GO:0016787	hydrolase activity	MF	1	0.230143	1	2.76506	automatic	FALSE	TRUE	FALSE
SPACUNK4.12c	insulinase pombe homologue 1	GO:0140096	catalytic activity, acting on a protein	MF	1	0.126273	1	2.73945	automatic	FALSE	TRUE	FALSE
SPACUNK4.12c	insulinase pombe homologue 1	GO:0008233	peptidase activity	MF	1	0.169043	1	3.17927	automatic	FALSE	TRUE	FALSE
SPACUNK4.12c	insulinase pombe homologue 1	GO:0070011	peptidase activity, acting on L-amino acid peptides	MF	1	0.160896	1	3.18574	automatic	FALSE	TRUE	FALSE
SPAC4D7.04c	cis-prenyltransferase	GO:0016740	transferase activity	MF	1	0.264766	1	3.34383		FALSE	TRUE	FALSE
SPAC4G8.05	serine/threonine protein kinase Ppk14 (predicted)	GO:0016740	transferase activity	MF	1	0.949084	1	3.34383		FALSE	FALSE	FALSE
SPAC4G8.05	serine/threonine protein kinase Ppk14 (predicted)	GO:0016773	phosphotransferase activity, alcohol group as acceptor	MF	1	0.973523	1	4.12048		FALSE	FALSE	FALSE
SPAC4G8.05	serine/threonine protein kinase Ppk14 (predicted)	GO:0016301	kinase activity	MF	1	0.96945	1	4.07069		FALSE	FALSE	FALSE
SPAC4G8.05	serine/threonine protein kinase Ppk14 (predicted)	GO:0140096	catalytic activity, acting on a protein	MF	1	0.99389	1	2.73945		FALSE	FALSE	FALSE
SPAC4G8.05	serine/threonine protein kinase Ppk14 (predicted)	GO:0004672	protein kinase activity	MF	1	0.983707	1	4.24164		FALSE	FALSE	FALSE
SPAC4G8.05	serine/threonine protein kinase Ppk14 (predicted)	GO:0016772	transferase activity, transferring phosphorus-containing groups	MF	1	0.997963	1	3.90155		FALSE	FALSE	FALSE
SPBC660.10	mitochondrial translation elongation factor G Mef2 (predicted)	GO:0016462	pyrophosphatase activity	MF	1	0.279022	1	5.02334	automatic	FALSE	TRUE	FALSE
SPBC660.10	mitochondrial translation elongation factor G Mef2 (predicted)	GO:0016818	hydrolase activity, acting on acid anhydrides, in phosphorus-containing anhydrides	MF	1	0.164969	1	5.02334	automatic	FALSE	TRUE	FALSE
SPBC660.10	mitochondrial translation elongation factor G Mef2 (predicted)	GO:0017111	nucleoside-triphosphatase activity	MF	1	0.213849	1	5.2236	automatic	FALSE	TRUE	FALSE
SPBC660.10	mitochondrial translation elongation factor G Mef2 (predicted)	GO:0016817	hydrolase activity, acting on acid anhydrides	MF	1	0.272912	1	5.01965	automatic	FALSE	TRUE	FALSE
SPBC660.10	mitochondrial translation elongation factor G Mef2 (predicted)	GO:0016787	hydrolase activity	MF	1	0.181263	1	2.76506	automatic	FALSE	TRUE	FALSE
SPBC947.09	ThiJ domain protein, implicated in cellular detoxification	GO:0016829	lyase activity	MF	1	0.268839	1	5.93964		FALSE	FALSE	TRUE
SPBC776.04	COPII cargo receptor subunit Sec23b (predicted)	GO:0005515	protein binding	MF	1	0.1222	1	2.77713		FALSE	TRUE	FALSE
SPAC4F10.11	mitotic septin Spn1	GO:0005515	protein binding	MF	1	0.181263	1	2.77713	experimental	FALSE	TRUE	FALSE
SPBC365.15	gamma tubulin complex Spc97/GCP2 subunit Alp4	GO:0005515	protein binding	MF	1	0.289206	1	2.77713	experimental	FALSE	TRUE	FALSE
SPCC777.15	tRNA dihydrouridine synthase Dus4 (predicted)	GO:0140098	catalytic activity, acting on RNA	MF	1	0.11609	1	5.02705	automatic	FALSE	TRUE	FALSE
SPBC1711.17	ATP-dependent RNA helicase Prp16	GO:0003723	RNA binding	MF	1	0.126273	1	3.99108	experimental	FALSE	TRUE	FALSE
SPBC428.13c	Sid2-Mob1 kinase complex regulatory subunit Mob1	GO:0005515	protein binding	MF	1	0.173116	1	2.77713	experimental	FALSE	TRUE	FALSE
SPAC4G8.07c	tRNA (m5U54) methyltransferase Trm2 (predicted)	GO:0016788	hydrolase activity, acting on ester bonds	MF	1	0.11609	1	4.6816		FALSE	TRUE	FALSE
SPAC4G8.07c	tRNA (m5U54) methyltransferase Trm2 (predicted)	GO:0016787	hydrolase activity	MF	1	0.230143	1	2.76506		FALSE	TRUE	FALSE
SPAC4G8.07c	tRNA (m5U54) methyltransferase Trm2 (predicted)	GO:0016740	transferase activity	MF	1	0.309572	1	3.34383	automatic	FALSE	TRUE	FALSE
SPAC4G8.07c	tRNA (m5U54) methyltransferase Trm2 (predicted)	GO:0140101	catalytic activity, acting on a tRNA	MF	1	0.175153	1	5.93042	automatic	FALSE	TRUE	FALSE
SPAC4G8.07c	tRNA (m5U54) methyltransferase Trm2 (predicted)	GO:0140098	catalytic activity, acting on RNA	MF	1	0.285132	1	5.02705	automatic	FALSE	TRUE	FALSE
SPAC4G8.07c	tRNA (m5U54) methyltransferase Trm2 (predicted)	GO:0008168	methyltransferase activity	MF	1	0.344196	1	5.63816	automatic	FALSE	TRUE	FALSE
SPAC4G8.07c	tRNA (m5U54) methyltransferase Trm2 (predicted)	GO:0016741	transferase activity, transferring one-carbon groups	MF	1	0.450102	1	5.56552	automatic	FALSE	TRUE	FALSE
SPAC1399.02	transmembrane transporter (predicted)	GO:0022857	transmembrane transporter activity	MF	1	0.537678	1	4.81063	curated	FALSE	FALSE	FALSE
SPAC3H1.06c	transmembrane transporter (predicted)	GO:0022857	transmembrane transporter activity	MF	1	0.553971	1	4.81063	curated	FALSE	FALSE	FALSE
SPBC16A3.17c	transmembrane transporter (predicted)	GO:0022857	transmembrane transporter activity	MF	1	0.476578	1	4.81063	curated	FALSE	FALSE	FALSE
SPCC895.03c	tRNA N6-threonyl-carbamoyl-adenosine (t6A) Sua5 (predicted)	GO:0097159	organic cyclic compound binding	MF	1	0.195519	1	3.00401	automatic	FALSE	TRUE	FALSE
SPCC895.03c	tRNA N6-threonyl-carbamoyl-adenosine (t6A) Sua5 (predicted)	GO:1901363	heterocyclic compound binding	MF	1	0.201629	1	3.00894	automatic	FALSE	TRUE	FALSE
SPBP22H7.05c	ATPase with bromodomain protein (predicted)	GO:0005515	protein binding	MF	1	0.105906	1	2.77713		FALSE	TRUE	FALSE
SPBC17G9.06c	siderophore-iron biosynthesis protein (predicted)	GO:0016740	transferase activity	MF	1	0.132383	1	3.34383	automatic	FALSE	FALSE	FALSE
SPBC16A3.01	mitotic septin Spn3	GO:0005515	protein binding	MF	1	0.130346	1	2.77713	experimental	FALSE	FALSE	FALSE
SPBC20F10.06	mitotic spindle checkpoint protein Mad2	GO:0005515	protein binding	MF	1	0.10998	1	2.77713	experimental	FALSE	TRUE	FALSE
SPAC1006.09	MAP kinase kinase kinase Win1	GO:0005515	protein binding	MF	1	0.10387	1	2.77713	experimental	FALSE	TRUE	FALSE
SPAC29A4.20	elongator complex subunit Elp3	GO:0016740	transferase activity	MF	1	0.12831	1	3.34383	automatic	FALSE	TRUE	FALSE
SPAC1B3.15c	transmembrane transporter (predicted)	GO:0015075	ion transmembrane transporter activity	MF	1	0.317719	1	5.26518		FALSE	FALSE	FALSE
SPAC1B3.15c	transmembrane transporter (predicted)	GO:0015318	inorganic molecular entity transmembrane transporter activity	MF	1	0.219959	1	5.39602		FALSE	FALSE	FALSE
SPAC1B3.15c	transmembrane transporter (predicted)	GO:0008509	anion transmembrane transporter activity	MF	1	0.228106	1	5.93042		FALSE	FALSE	FALSE
SPAC1B3.15c	transmembrane transporter (predicted)	GO:0022857	transmembrane transporter activity	MF	1	0.352342	1	4.81063	curated	FALSE	FALSE	FALSE
SPAC1B3.15c	transmembrane transporter (predicted)	GO:0005342	organic acid transmembrane transporter activity	MF	1	0.152749	1	6.25232		FALSE	FALSE	FALSE
SPAC1B3.15c	transmembrane transporter (predicted)	GO:0008514	organic anion transmembrane transporter activity	MF	1	0.136456	1	6.06789		FALSE	FALSE	FALSE
SPAC1B3.15c	transmembrane transporter (predicted)	GO:0022890	inorganic cation transmembrane transporter activity	MF	1	0.105906	1	6.21505		FALSE	FALSE	FALSE
SPBC12D12.01	spindle pole body SUN domain protein Sad1	GO:0005515	protein binding	MF	1	0.164969	1	2.77713	experimental	FALSE	TRUE	FALSE
SPBC14C8.17c	SAGA complex subunit Spt8	GO:0005515	protein binding	MF	1	0.107943	1	2.77713		FALSE	FALSE	FALSE
SPCC1259.15c	ubiquitin conjugating enzyme E2, Ubc11/UbcP4	GO:0005515	protein binding	MF	1	0.142566	1	2.77713	experimental	FALSE	TRUE	FALSE
SPAC644.18c	TRAPP complex subunit Bet3 (predicted)	GO:0005515	protein binding	MF	1	0.268839	1	2.77713		FALSE	TRUE	FALSE
SPAC11D3.13	ThiJ domain protein, implicated in cellular detoxification	GO:0016829	lyase activity	MF	1	0.207739	1	5.93964		FALSE	FALSE	TRUE
SPAC2G11.11c	ATP-dependent RNA helicase Prh1 (predicted)	GO:0003676	nucleic acid binding	MF	1	0.250509	1	3.50537		FALSE	TRUE	FALSE
SPAC637.13c	cytoskeletal signaling protein Slm1 (predicted)	GO:0005515	protein binding	MF	1	0.120163	1	2.77713		FALSE	FALSE	FALSE
SPAC6C3.06c	Golgi membrane phospholipid translocase (flippase) Neo1 (predicted)	GO:0005515	protein binding	MF	1	0.105906	1	2.77713		FALSE	TRUE	FALSE
SPCC417.10	dipeptide transmembrane transporter Dal5h1 (predicted)	GO:0015075	ion transmembrane transporter activity	MF	1	0.224033	1	5.26518		FALSE	TRUE	FALSE
SPCC417.10	dipeptide transmembrane transporter Dal5h1 (predicted)	GO:0015318	inorganic molecular entity transmembrane transporter activity	MF	1	0.325866	1	5.39602		FALSE	TRUE	FALSE
SPCC417.10	dipeptide transmembrane transporter Dal5h1 (predicted)	GO:0008509	anion transmembrane transporter activity	MF	1	0.179226	1	5.93042		FALSE	TRUE	FALSE
SPCC417.10	dipeptide transmembrane transporter Dal5h1 (predicted)	GO:0005342	organic acid transmembrane transporter activity	MF	1	0.173116	1	6.25232		FALSE	TRUE	FALSE
SPCC417.10	dipeptide transmembrane transporter Dal5h1 (predicted)	GO:0008514	organic anion transmembrane transporter activity	MF	1	0.232179	1	6.06789		FALSE	TRUE	FALSE
SPAC23C4.14	mannosyltransferase complex subunit Alg1 (predicted)	GO:0016740	transferase activity	MF	1	0.399185	1	3.34383	automatic	FALSE	TRUE	FALSE
SPAC23C4.14	mannosyltransferase complex subunit Alg1 (predicted)	GO:0016758	transferase activity, transferring hexosyl groups	MF	1	0.470468	1	6.27796	automatic	FALSE	TRUE	FALSE
SPAC23C4.14	mannosyltransferase complex subunit Alg1 (predicted)	GO:0016757	transferase activity, transferring glycosyl groups	MF	1	0.417515	1	6.00665	automatic	FALSE	TRUE	FALSE
SPCC550.10	betaine-aldehyde dehydrogenase Atd3 (predicted)	GO:0016491	oxidoreductase activity	MF	1	0.665988	1	4.6505	automatic	FALSE	FALSE	FALSE
SPBC1711.13	histidinol dehydrogenase His2 (predicted)	GO:0016787	hydrolase activity	MF	1	0.124236	1	2.76506		FALSE	FALSE	FALSE
SPBC1718.05	TRAPP complex subunit Trs31 (predicted)	GO:0005515	protein binding	MF	1	0.158859	1	2.77713		FALSE	TRUE	FALSE
SPBC685.04c	AP-2 adaptor complex sigma subunit Aps2 (predicted)	GO:0005515	protein binding	MF	1	0.242363	1	2.77713		FALSE	TRUE	FALSE
SPBC25H2.16c	Golgi localized Arf binding gamma-adaptin ortholog Gga22	GO:0005515	protein binding	MF	1	0.205703	1	2.77713		FALSE	TRUE	FALSE
SPCC757.13	dipeptide transmembrane transporter (predicted)	GO:0015075	ion transmembrane transporter activity	MF	1	0.199593	1	5.26518		FALSE	TRUE	FALSE
SPCC757.13	dipeptide transmembrane transporter (predicted)	GO:0015318	inorganic molecular entity transmembrane transporter activity	MF	1	0.270876	1	5.39602		FALSE	TRUE	FALSE
SPCC757.13	dipeptide transmembrane transporter (predicted)	GO:0008509	anion transmembrane transporter activity	MF	1	0.164969	1	5.93042		FALSE	TRUE	FALSE
SPCC757.13	dipeptide transmembrane transporter (predicted)	GO:0005342	organic acid transmembrane transporter activity	MF	1	0.179226	1	6.25232		FALSE	TRUE	FALSE
SPCC757.13	dipeptide transmembrane transporter (predicted)	GO:0008514	organic anion transmembrane transporter activity	MF	1	0.10387	1	6.06789		FALSE	TRUE	FALSE
SPBC1773.15	dipeptide transmembrane transporter Dal5h2 (predicted)	GO:0015075	ion transmembrane transporter activity	MF	1	0.207739	1	5.26518		FALSE	TRUE	FALSE
SPBC1773.15	dipeptide transmembrane transporter Dal5h2 (predicted)	GO:0015318	inorganic molecular entity transmembrane transporter activity	MF	1	0.136456	1	5.39602		FALSE	TRUE	FALSE
SPBC1773.15	dipeptide transmembrane transporter Dal5h2 (predicted)	GO:0008509	anion transmembrane transporter activity	MF	1	0.150713	1	5.93042		FALSE	TRUE	FALSE
SPBC1773.15	dipeptide transmembrane transporter Dal5h2 (predicted)	GO:0022857	transmembrane transporter activity	MF	1	0.309572	1	4.81063	curated	FALSE	TRUE	FALSE
SPBC1773.15	dipeptide transmembrane transporter Dal5h2 (predicted)	GO:0005342	organic acid transmembrane transporter activity	MF	1	0.217923	1	6.25232		FALSE	TRUE	FALSE
SPBC1773.15	dipeptide transmembrane transporter Dal5h2 (predicted)	GO:0008514	organic anion transmembrane transporter activity	MF	1	0.14664	1	6.06789		FALSE	TRUE	FALSE
SPAC1093.06c	dynein heavy chain, minus-end directed microtubule motor Dhc1	GO:0005515	protein binding	MF	1	0.156823	1	2.77713	experimental	FALSE	TRUE	FALSE
SPAC4H3.10c	pyruvate kinase	GO:1901363	heterocyclic compound binding	MF	1	0.152749	1	3.00894	automatic	FALSE	TRUE	FALSE
SPAC4H3.10c	pyruvate kinase	GO:0097159	organic cyclic compound binding	MF	1	0.13442	1	3.00401	automatic	FALSE	TRUE	FALSE
SPBC460.05	transmembrane transporter (predicted)	GO:0015075	ion transmembrane transporter activity	MF	1	0.197556	1	5.26518		FALSE	TRUE	FALSE
SPBC460.05	transmembrane transporter (predicted)	GO:0015318	inorganic molecular entity transmembrane transporter activity	MF	1	0.293279	1	5.39602		FALSE	TRUE	FALSE
SPBC460.05	transmembrane transporter (predicted)	GO:0008509	anion transmembrane transporter activity	MF	1	0.160896	1	5.93042		FALSE	TRUE	FALSE
SPBC460.05	transmembrane transporter (predicted)	GO:0022857	transmembrane transporter activity	MF	1	0.419552	1	4.81063	curated	FALSE	TRUE	FALSE
SPBC460.05	transmembrane transporter (predicted)	GO:0005342	organic acid transmembrane transporter activity	MF	1	0.138493	1	6.25232		FALSE	TRUE	FALSE
SPBC460.05	transmembrane transporter (predicted)	GO:0008514	organic anion transmembrane transporter activity	MF	1	0.132383	1	6.06789		FALSE	TRUE	FALSE
SPBC1347.07	RNA exonuclease (predicted)	GO:0016788	hydrolase activity, acting on ester bonds	MF	1	0.213849	1	4.6816	automatic	FALSE	TRUE	FALSE
SPBC1347.07	RNA exonuclease (predicted)	GO:0004518	nuclease activity	MF	1	0.156823	1	5.69451	automatic	FALSE	TRUE	FALSE
SPBC1347.07	RNA exonuclease (predicted)	GO:0016787	hydrolase activity	MF	1	0.399185	1	2.76506	automatic	FALSE	TRUE	FALSE
SPAC23H4.01c	sterol intermembrane transfer protein Osh3	GO:0005515	protein binding	MF	1	0.130346	1	2.77713		FALSE	TRUE	FALSE
SPCC825.03c	plasma membrane SNARE Psy1	GO:0005515	protein binding	MF	1	0.460285	1	2.77713	automatic	FALSE	TRUE	FALSE
SPBC4F6.09	plasma membrane siderophore-iron transmembrane transporter Str1	GO:0022857	transmembrane transporter activity	MF	1	0.334012	1	4.81063	automatic	FALSE	FALSE	FALSE
SPBC4F6.09	plasma membrane siderophore-iron transmembrane transporter Str1	GO:0005215	transporter activity	MF	1	0.360489	1	4.67635	automatic	FALSE	FALSE	FALSE
SPAC6G9.05	coenzyme A diphosphatase (predicted)	GO:0016788	hydrolase activity, acting on ester bonds	MF	1	0.12831	1	4.6816		FALSE	TRUE	FALSE
SPCC1223.03c	glycerol-3-phosphate dehydrogenase Gut2 (predicted)	GO:0016491	oxidoreductase activity	MF	1	0.287169	1	4.6505	automatic	FALSE	TRUE	FALSE
SPAC607.03c	U3 snoRNP-associated protein Snu13	GO:1901363	heterocyclic compound binding	MF	1	0.270876	1	3.00894	automatic	FALSE	TRUE	FALSE
SPAC607.03c	U3 snoRNP-associated protein Snu13	GO:0097159	organic cyclic compound binding	MF	1	0.293279	1	3.00401	automatic	FALSE	TRUE	FALSE
SPAC607.03c	U3 snoRNP-associated protein Snu13	GO:0003676	nucleic acid binding	MF	1	0.307536	1	3.50537	automatic	FALSE	TRUE	FALSE
SPAC607.03c	U3 snoRNP-associated protein Snu13	GO:0003723	RNA binding	MF	1	0.211813	1	3.99108	automatic	FALSE	TRUE	FALSE
SPAC630.03	Arp2/3 protein complex, actin-like protein subunit Arp3	GO:0097159	organic cyclic compound binding	MF	1	0.158859	1	3.00401	automatic	FALSE	TRUE	FALSE
SPAC630.03	Arp2/3 protein complex, actin-like protein subunit Arp3	GO:1901363	heterocyclic compound binding	MF	1	0.120163	1	3.00894	automatic	FALSE	TRUE	FALSE
SPCPJ732.01	retromer complex subunit Vps5	GO:0005515	protein binding	MF	1	0.136456	1	2.77713		FALSE	TRUE	FALSE
SPBC13E7.11	mitochondrial rhomboid protease (predicted)	GO:0016787	hydrolase activity	MF	1	0.303462	1	2.76506	automatic	FALSE	TRUE	FALSE
SPBC13E7.11	mitochondrial rhomboid protease (predicted)	GO:0140096	catalytic activity, acting on a protein	MF	1	0.162933	1	2.73945	automatic	FALSE	TRUE	FALSE
SPBC13E7.11	mitochondrial rhomboid protease (predicted)	GO:0070011	peptidase activity, acting on L-amino acid peptides	MF	1	0.173116	1	3.18574	automatic	FALSE	TRUE	FALSE
SPAC24C9.08	vacuolar carboxypeptidase (predicted)	GO:0016787	hydrolase activity	MF	1	0.219959	1	2.76506	automatic	FALSE	TRUE	FALSE
SPCC962.06c	KH and CC/hC domain splicing factor Bpb1	GO:1901363	heterocyclic compound binding	MF	1	0.342159	1	3.00894	automatic	FALSE	TRUE	FALSE
SPCC962.06c	KH and CC/hC domain splicing factor Bpb1	GO:0097159	organic cyclic compound binding	MF	1	0.331976	1	3.00401	automatic	FALSE	TRUE	FALSE
SPCC962.06c	KH and CC/hC domain splicing factor Bpb1	GO:0003676	nucleic acid binding	MF	1	0.303462	1	3.50537	automatic	FALSE	TRUE	FALSE
SPAC30D11.05	AP-3 adaptor complex subunit Aps3 (predicted)	GO:0005515	protein binding	MF	1	0.156823	1	2.77713		FALSE	TRUE	FALSE
SPBC1711.08	chaperone activator Aha1	GO:0005515	protein binding	MF	1	0.1222	1	2.77713	experimental	FALSE	TRUE	FALSE
SPBC16G5.07c	stomatin (predicted)	GO:0043167	ion binding	MF	1	0.11609	1	3.26676		FALSE	TRUE	FALSE
SPAC22A12.01c	DNA 5' exonuclease (predicted)	GO:0140097	catalytic activity, acting on DNA	MF	1	0.126273	1	5.46271		FALSE	TRUE	FALSE
SPAC6F12.06	Rho GDP dissociation inhibitor Rdi1 (predicted)	GO:0005515	protein binding	MF	1	0.185336	1	2.77713		FALSE	TRUE	FALSE
SPBC530.01	GTPase activating protein Gyp1 (predicted)	GO:0005515	protein binding	MF	1	0.124236	1	2.77713		FALSE	TRUE	FALSE
SPCC794.11c	ENTH/VHS domain protein Ent3 (predicted)	GO:0005515	protein binding	MF	1	0.213849	1	2.77713		FALSE	TRUE	FALSE
SPCC285.08	coatomer delta subunit Ret2 (predicted)	GO:0005515	protein binding	MF	1	0.14053	1	2.77713		FALSE	TRUE	FALSE
SPCC18.12c	rRNA processing protein Utp23 (predicted)	GO:1901363	heterocyclic compound binding	MF	1	0.372709	1	3.00894		FALSE	TRUE	FALSE
SPCC18.12c	rRNA processing protein Utp23 (predicted)	GO:0003676	nucleic acid binding	MF	1	0.293279	1	3.50537		FALSE	TRUE	FALSE
SPCC18.12c	rRNA processing protein Utp23 (predicted)	GO:0097159	organic cyclic compound binding	MF	1	0.287169	1	3.00401		FALSE	TRUE	FALSE
SPAC1296.06	CIA machinery NADPH-dependent diflavin oxidoreductase Tah18 (predicted)	GO:0016491	oxidoreductase activity	MF	1	0.517312	1	4.6505	automatic	FALSE	TRUE	FALSE
SPBC11G11.04	TRAPP complex subunit Trs20 (predicted)	GO:0005515	protein binding	MF	1	0.152749	1	2.77713		FALSE	TRUE	FALSE
SPAC1F3.05	Golgi localized Arf binding gamma-adaptin ortholog Gga21	GO:0005515	protein binding	MF	1	0.132383	1	2.77713		FALSE	TRUE	FALSE
SPAC1142.02c	TPR repeat protein, SGT2 family (predicted)	GO:0005515	protein binding	MF	1	0.173116	1	2.77713		FALSE	TRUE	FALSE
[truncated: 54,595 more rows]

## Sheet: NETFF filtered
gene_id	gene_name	go_id	go_name	go_namespace	probability	probability_ml	probability_caft	information_content	pombase_evidence_code	is_priority_unstudied_gene	is_conserved_in_vertebrates	is_unknown_function_gene
SPAC56E4.03	aromatic aminotransferase (predicted)	GO:1901605	alpha-amino acid metabolic process	BP	1	0.519348	1	5.17073		FALSE	TRUE	FALSE
SPBC1271.10c	transmembrane transporter (predicted)	GO:0006812	cation transport	BP	1	0.268839	1	5.38532		FALSE	FALSE	FALSE
SPBC1773.13	aromatic aminotransferase (predicted)	GO:1901605	alpha-amino acid metabolic process	BP	1	0.232179	1	5.17073		FALSE	TRUE	FALSE
SPCC569.07	aromatic aminotransferase (predicted)	GO:1901605	alpha-amino acid metabolic process	BP	1	0.236253	1	5.17073		FALSE	TRUE	FALSE
SPBC1348.05	transmembrane transporter (predicted)	GO:0006812	cation transport	BP	1	0.244399	1	5.38532		FALSE	FALSE	FALSE
SPBC1348.05	transmembrane transporter (predicted)	GO:0098655	cation transmembrane transport	BP	1	0.305499	1	5.46271		FALSE	FALSE	FALSE
SPBPB2B2.16c	transmembrane transporter (predicted)	GO:0006812	cation transport	BP	1	0.224033	1	5.38532		FALSE	FALSE	FALSE
SPBPB2B2.16c	transmembrane transporter (predicted)	GO:0098655	cation transmembrane transport	BP	1	0.162933	1	5.46271		FALSE	FALSE	FALSE
SPAC750.02c	transmembrane transporter (predicted)	GO:0006812	cation transport	BP	1	0.289206	1	5.38532		FALSE	FALSE	FALSE
SPAC750.02c	transmembrane transporter (predicted)	GO:0098655	cation transmembrane transport	BP	1	0.486762	1	5.46271		FALSE	FALSE	FALSE
SPAC23C4.02	actin binding protein, coronin Crn1	GO:0032970	regulation of actin filament-based process	BP	1	0.171079	1	5.89438		FALSE	TRUE	FALSE
SPAC23C4.02	actin binding protein, coronin Crn1	GO:0051493	regulation of cytoskeleton organization	BP	1	0.187373	1	5.77758		FALSE	TRUE	FALSE
SPAC23C4.02	actin binding protein, coronin Crn1	GO:0044087	regulation of cellular component biogenesis	BP	1	0.175153	1	5.45128		FALSE	TRUE	FALSE
SPAC23C4.02	actin binding protein, coronin Crn1	GO:0032956	regulation of actin cytoskeleton organization	BP	1	0.124236	1	5.92129		FALSE	TRUE	FALSE
SPAC23C4.02	actin binding protein, coronin Crn1	GO:0010638	positive regulation of organelle organization	BP	1	0.181263	1	5.54659		FALSE	TRUE	FALSE
SPAC23C4.02	actin binding protein, coronin Crn1	GO:0051130	positive regulation of cellular component organization	BP	1	0.12831	1	5.36427		FALSE	TRUE	FALSE
SPAC23C4.02	actin binding protein, coronin Crn1	GO:0097435	supramolecular fiber organization	BP	1	0.203666	1	6.0368		FALSE	TRUE	FALSE
SPCC4B3.05c	uroporphyrinogen decarboxylase Hem12 (predicted)	GO:0051186	obsolete cofactor metabolic process	BP	1	0.144603	1	10.6218		FALSE	TRUE	FALSE
SPAC3A11.09	plasma membrane sodium ion/proton antiporter Sod22	GO:0006873	cellular ion homeostasis	BP	1	0.162933	1	6.13313	automatic	FALSE	FALSE	FALSE
SPAC3A11.09	plasma membrane sodium ion/proton antiporter Sod22	GO:0048878	chemical homeostasis	BP	1	0.112016	1	6.00665	automatic	FALSE	FALSE	FALSE
SPAC3A11.09	plasma membrane sodium ion/proton antiporter Sod22	GO:0019725	cellular homeostasis	BP	1	0.10998	1	5.90327	automatic	FALSE	FALSE	FALSE
SPAC3A11.09	plasma membrane sodium ion/proton antiporter Sod22	GO:0055082	cellular chemical homeostasis	BP	1	0.124236	1	6.09998	automatic	FALSE	FALSE	FALSE
SPAC3A11.09	plasma membrane sodium ion/proton antiporter Sod22	GO:0042592	homeostatic process	BP	1	0.181263	1	5.40141	automatic	FALSE	FALSE	FALSE
SPAP8A3.07c	phospho-2-dehydro-3-deoxyheptonate aldolase (predicted)	GO:0008652	cellular amino acid biosynthetic process	BP	1	0.189409	1	5.57191	automatic	FALSE	FALSE	FALSE
SPAC24H6.10c	phospho-2-dehydro-3-deoxyheptonate aldolase (predicted)	GO:0008652	cellular amino acid biosynthetic process	BP	1	0.114053	1	5.57191	automatic	FALSE	FALSE	FALSE
SPCC1020.06c	transaldolase (predicted)	GO:0055114	oxidation-reduction process	BP	1	0.301426	1	6.21505	curated	FALSE	TRUE	FALSE
SPAC29B12.01	SNF2 family ATP-dependent 3' to 5' DNA helicase Ino80	GO:0045892	negative regulation of transcription, DNA-templated	BP	1	0.232179	1	5.42327		FALSE	TRUE	FALSE
SPAC29B12.01	SNF2 family ATP-dependent 3' to 5' DNA helicase Ino80	GO:1902679	negative regulation of RNA biosynthetic process	BP	1	0.162933	1	5.42327		FALSE	TRUE	FALSE
SPAC29B12.01	SNF2 family ATP-dependent 3' to 5' DNA helicase Ino80	GO:2000113	negative regulation of cellular macromolecule biosynthetic process	BP	1	0.179226	1	5.10834		FALSE	TRUE	FALSE
SPAC29B12.01	SNF2 family ATP-dependent 3' to 5' DNA helicase Ino80	GO:0009890	negative regulation of biosynthetic process	BP	1	0.205703	1	5.04204		FALSE	TRUE	FALSE
SPAC29B12.01	SNF2 family ATP-dependent 3' to 5' DNA helicase Ino80	GO:0051172	negative regulation of nitrogen compound metabolic process	BP	1	0.238289	1	5.01229		FALSE	TRUE	FALSE
SPAC29B12.01	SNF2 family ATP-dependent 3' to 5' DNA helicase Ino80	GO:0051253	negative regulation of RNA metabolic process	BP	1	0.107943	1	5.38002		FALSE	TRUE	FALSE
SPAC29B12.01	SNF2 family ATP-dependent 3' to 5' DNA helicase Ino80	GO:0045934	negative regulation of nucleobase-containing compound metabolic process	BP	1	0.236253	1	5.21459		FALSE	TRUE	FALSE
SPAC29B12.01	SNF2 family ATP-dependent 3' to 5' DNA helicase Ino80	GO:1903507	negative regulation of nucleic acid-templated transcription	BP	1	0.230143	1	5.42327		FALSE	TRUE	FALSE
SPAC29B12.01	SNF2 family ATP-dependent 3' to 5' DNA helicase Ino80	GO:0031327	negative regulation of cellular biosynthetic process	BP	1	0.221996	1	5.04204		FALSE	TRUE	FALSE
SPAC29B12.01	SNF2 family ATP-dependent 3' to 5' DNA helicase Ino80	GO:0010558	negative regulation of macromolecule biosynthetic process	BP	1	0.199593	1	5.10834		FALSE	TRUE	FALSE
SPAC23C11.16	Polo kinase Plo1	GO:0035556	intracellular signal transduction	BP	1	0.372709	1	5.19242	experimental	FALSE	TRUE	FALSE
SPAC19D5.01	tyrosine phosphatase Pyp2	GO:1902749	regulation of cell cycle G2/M phase transition	BP	1	0.101833	1	5.80148	experimental	FALSE	TRUE	FALSE
SPAC19D5.01	tyrosine phosphatase Pyp2	GO:1901990	regulation of mitotic cell cycle phase transition	BP	1	0.112016	1	5.06494	experimental	FALSE	TRUE	FALSE
SPAC26F1.10c	tyrosine phosphatase Pyp1	GO:0010389	regulation of G2/M transition of mitotic cell cycle	BP	1	0.148676	1	5.82598	experimental	FALSE	TRUE	FALSE
SPAC26F1.10c	tyrosine phosphatase Pyp1	GO:1902749	regulation of cell cycle G2/M phase transition	BP	1	0.112016	1	5.80148	experimental	FALSE	TRUE	FALSE
SPAC26F1.10c	tyrosine phosphatase Pyp1	GO:1901990	regulation of mitotic cell cycle phase transition	BP	1	0.164969	1	5.06494	experimental	FALSE	TRUE	FALSE
SPAC26F1.10c	tyrosine phosphatase Pyp1	GO:1901987	regulation of cell cycle phase transition	BP	1	0.138493	1	5.005	experimental	FALSE	TRUE	FALSE
SPAC16.03c	dihydroorotase Ura2	GO:0055086	nucleobase-containing small molecule metabolic process	BP	1	0.150713	1	5.04582	automatic	FALSE	FALSE	FALSE
SPAC589.09	sec14 cytosolic factor family, phospholipid-intermembrane transfer protein Csr1 (predicted)	GO:0048193	Golgi vesicle transport	BP	1	0.158859	1	5.60449		FALSE	TRUE	FALSE
SPCC777.03c	nifs homolog, possible cysteine desulfurase	GO:0006790	sulfur compound metabolic process	BP	1	0.209776	1	5.53417		FALSE	FALSE	TRUE
SPCC777.03c	nifs homolog, possible cysteine desulfurase	GO:0046394	carboxylic acid biosynthetic process	BP	1	0.12831	1	5.22814		FALSE	FALSE	TRUE
SPBC29A10.10c	ATP-dependent RNA helicase Dbl8	GO:0032774	RNA biosynthetic process	BP	1	0.329939	1	5.5219		FALSE	TRUE	FALSE
SPBC119.15	RNA polymerase II binding AAA family ATPase Npa3 (predicted)	GO:0051169	nuclear transport	BP	1	0.171079	1	5.72393		FALSE	TRUE	FALSE
SPBC119.15	RNA polymerase II binding AAA family ATPase Npa3 (predicted)	GO:0006913	nucleocytoplasmic transport	BP	1	0.187373	1	5.72393		FALSE	TRUE	FALSE
SPBC119.15	RNA polymerase II binding AAA family ATPase Npa3 (predicted)	GO:0072594	establishment of protein localization to organelle	BP	1	0.138493	1	5.4978		FALSE	TRUE	FALSE
SPBC6B1.02	Ark1/Prk1 family protein kinase Ppk30	GO:0051049	regulation of transport	BP	1	0.120163	1	6.41707		FALSE	TRUE	FALSE
SPAC9E9.12c	ABC transmembrane transporter Ybt1	GO:0007034	vacuolar transport	BP	1	0.162933	1	5.68729		FALSE	TRUE	FALSE
SPAC9E9.12c	ABC transmembrane transporter Ybt1	GO:0098656	anion transmembrane transport	BP	1	0.191446	1	5.70179		FALSE	TRUE	FALSE
SPAC9E9.12c	ABC transmembrane transporter Ybt1	GO:0006820	anion transport	BP	1	0.319756	1	5.55286		FALSE	TRUE	FALSE
SPAC9E9.12c	ABC transmembrane transporter Ybt1	GO:0015711	organic anion transport	BP	1	0.301426	1	5.69451		FALSE	TRUE	FALSE
SPAC11D3.10	nifs homolog, possible cysteine desulfurase	GO:0006790	sulfur compound metabolic process	BP	1	0.342159	1	5.53417		FALSE	FALSE	TRUE
SPAC11D3.10	nifs homolog, possible cysteine desulfurase	GO:0016053	organic acid biosynthetic process	BP	1	0.215886	1	5.22814		FALSE	FALSE	TRUE
SPAC11D3.10	nifs homolog, possible cysteine desulfurase	GO:0046394	carboxylic acid biosynthetic process	BP	1	0.164969	1	5.22814		FALSE	FALSE	TRUE
SPAC11D3.10	nifs homolog, possible cysteine desulfurase	GO:0008652	cellular amino acid biosynthetic process	BP	1	0.189409	1	5.57191		FALSE	FALSE	TRUE
SPAC167.02	geranylgeranyltransferase II beta subunit Ptb1	GO:0090150	establishment of protein localization to membrane	BP	1	0.10387	1	6.51089		FALSE	TRUE	FALSE
SPCC4F11.02	MAP kinase threonine phosphatase Ptc1	GO:0070887	cellular response to chemical stimulus	BP	1	0.144603	1	5.64503	experimental	FALSE	TRUE	FALSE
SPCC4F11.02	MAP kinase threonine phosphatase Ptc1	GO:0042221	response to chemical	BP	1	0.207739	1	5.41228	experimental	FALSE	TRUE	FALSE
SPBC557.04	Ark1/Prk1 family protein kinase Ppk29	GO:0032879	regulation of localization	BP	1	0.130346	1	5.76195		FALSE	TRUE	FALSE
SPAC3A12.18	glucose-6-phosphate 1-dehydrogenase Zwf1	GO:0005975	carbohydrate metabolic process	BP	1	0.258656	1	5.57191	automatic	FALSE	TRUE	FALSE
SPBC31F10.13c	histone H3.3 H4 chaperone, hira family Hip1	GO:0034728	nucleosome organization	BP	1	0.230143	1	6.23974	experimental	FALSE	TRUE	FALSE
SPBC1D7.05	MAP kinase kinase kinase Byr2	GO:0032268	regulation of cellular protein metabolic process	BP	1	0.136456	1	5.51582		FALSE	TRUE	FALSE
SPBC1D7.05	MAP kinase kinase kinase Byr2	GO:0048583	regulation of response to stimulus	BP	1	0.228106	1	5.42327		FALSE	TRUE	FALSE
SPBC1D7.05	MAP kinase kinase kinase Byr2	GO:0048584	positive regulation of response to stimulus	BP	1	0.295316	1	6.46288		FALSE	TRUE	FALSE
SPBC1D7.05	MAP kinase kinase kinase Byr2	GO:0023051	regulation of signaling	BP	1	0.281059	1	5.78548		FALSE	TRUE	FALSE
SPBC1D7.05	MAP kinase kinase kinase Byr2	GO:0032270	positive regulation of cellular protein metabolic process	BP	1	0.11609	1	6.51089		FALSE	TRUE	FALSE
SPBC1D7.05	MAP kinase kinase kinase Byr2	GO:0051174	regulation of phosphorus metabolic process	BP	1	0.167006	1	6.54423		FALSE	TRUE	FALSE
SPBC1D7.05	MAP kinase kinase kinase Byr2	GO:1902531	regulation of intracellular signal transduction	BP	1	0.291242	1	6.0166		FALSE	TRUE	FALSE
SPBC1D7.05	MAP kinase kinase kinase Byr2	GO:0031399	regulation of protein modification process	BP	1	0.169043	1	6.09998		FALSE	TRUE	FALSE
SPBC1D7.05	MAP kinase kinase kinase Byr2	GO:0010646	regulation of cell communication	BP	1	0.246436	1	5.69451		FALSE	TRUE	FALSE
SPBC1D7.05	MAP kinase kinase kinase Byr2	GO:0019220	regulation of phosphate metabolic process	BP	1	0.136456	1	6.54423		FALSE	TRUE	FALSE
SPBC1D7.05	MAP kinase kinase kinase Byr2	GO:0009966	regulation of signal transduction	BP	1	0.268839	1	5.79345		FALSE	TRUE	FALSE
SPBC1D7.05	MAP kinase kinase kinase Byr2	GO:0051247	positive regulation of protein metabolic process	BP	1	0.124236	1	6.51089		FALSE	TRUE	FALSE
SPAC26A3.11	mitochondrial omega-amidase (predicted)	GO:1901605	alpha-amino acid metabolic process	BP	1	0.203666	1	5.17073		FALSE	TRUE	FALSE
SPAC26A3.11	mitochondrial omega-amidase (predicted)	GO:0032787	monocarboxylic acid metabolic process	BP	1	0.152749	1	5.93964		FALSE	TRUE	FALSE
SPBC12D12.05c	mitochondrial carrier, ATP:ADP antiporter (predicted)	GO:0006812	cation transport	BP	1	0.169043	1	5.38532		FALSE	TRUE	FALSE
SPBC713.04c	U3 snoRNP-associated protein Utp1 (predicted)	GO:0006364	rRNA processing	BP	1	0.374745	1	5.35391	curated	FALSE	TRUE	FALSE
SPBC1683.03c	transmembrane transporter (predicted)	GO:0006812	cation transport	BP	1	0.11609	1	5.38532		FALSE	FALSE	FALSE
SPAC1834.02	pentafunctional aromatic polypeptide Aro1 (predicted)	GO:0008652	cellular amino acid biosynthetic process	BP	1	0.240326	1	5.57191	automatic	FALSE	FALSE	FALSE
SPAC3C7.13c	glucose-6-phosphate 1-dehydrogenase (predicted)	GO:0005975	carbohydrate metabolic process	BP	1	0.205703	1	5.57191	automatic	FALSE	TRUE	FALSE
SPCC1494.05c	CSN-associated deubiquitinating enzyme Ubp12	GO:0070647	protein modification by small protein conjugation or removal	BP	1	0.209776	1	5.28905	experimental	FALSE	TRUE	FALSE
SPBC16E9.11c	HECT-type ubiquitin-protein ligase E3 Pub3 (predicted)	GO:0072594	establishment of protein localization to organelle	BP	1	0.315682	1	5.4978		FALSE	TRUE	FALSE
SPBC16E9.11c	HECT-type ubiquitin-protein ligase E3 Pub3 (predicted)	GO:0007034	vacuolar transport	BP	1	0.264766	1	5.68729		FALSE	TRUE	FALSE
SPAC823.08c	ATP-dependent RNA helicase Rrp3 (predicted)	GO:0006364	rRNA processing	BP	1	0.171079	1	5.35391	curated	FALSE	TRUE	FALSE
SPBC4F6.18c	ADP-ribosylation factor, Arf family Arf1	GO:0050793	regulation of developmental process	BP	1	0.313646	1	5.68012		FALSE	TRUE	FALSE
SPBC4F6.18c	ADP-ribosylation factor, Arf family Arf1	GO:0035556	intracellular signal transduction	BP	1	0.150713	1	5.19242		FALSE	TRUE	FALSE
SPBC4F6.18c	ADP-ribosylation factor, Arf family Arf1	GO:0032879	regulation of localization	BP	1	0.132383	1	5.76195		FALSE	TRUE	FALSE
SPBC4F6.18c	ADP-ribosylation factor, Arf family Arf1	GO:0051049	regulation of transport	BP	1	0.14053	1	6.41707		FALSE	TRUE	FALSE
SPBC4F6.18c	ADP-ribosylation factor, Arf family Arf1	GO:0051130	positive regulation of cellular component organization	BP	1	0.164969	1	5.36427		FALSE	TRUE	FALSE
SPBC4F6.18c	ADP-ribosylation factor, Arf family Arf1	GO:0032506	cytokinetic process	BP	1	0.13442	1	5.81775		FALSE	TRUE	FALSE
SPCC63.07	tRNAHis guanylyltransferase Thg1 (predicted)	GO:0006400	tRNA modification	BP	1	0.154786	1	6.16742	curated	FALSE	TRUE	FALSE
SPBC12C2.11	glutamine-fructose-6-phosphate transaminase Gfa1 (predicted)	GO:1901137	carbohydrate derivative biosynthetic process	BP	1	0.105906	1	5.45698	curated	FALSE	TRUE	FALSE
SPAC959.02	alpha SNAP (predicted)	GO:0061024	membrane organization	BP	1	0.148676	1	5.68012		FALSE	TRUE	FALSE
SPAC17G8.14c	protein kinase C (PKC)-like Pck1	GO:0071554	cell wall organization or biogenesis	BP	1	0.152749	1	6.37327	experimental	FALSE	TRUE	FALSE
SPAC688.09	mitochondrial carrier, pyrimidine nucleotide Rim2 (predicted)	GO:0006812	cation transport	BP	1	0.154786	1	5.38532		FALSE	TRUE	FALSE
SPAC227.09	folylpolyglutamate synthase Fol3 (predicted)	GO:0051186	obsolete cofactor metabolic process	BP	1	0.12831	1	10.6218		FALSE	TRUE	FALSE
SPAC227.09	folylpolyglutamate synthase Fol3 (predicted)	GO:0016053	organic acid biosynthetic process	BP	1	0.173116	1	5.22814	automatic	FALSE	TRUE	FALSE
SPAC227.09	folylpolyglutamate synthase Fol3 (predicted)	GO:0046394	carboxylic acid biosynthetic process	BP	1	0.114053	1	5.22814	automatic	FALSE	TRUE	FALSE
SPBC582.08	alanine aminotransferase (predicted)	GO:0044282	small molecule catabolic process	BP	1	0.136456	1	6.00665	automatic	FALSE	TRUE	FALSE
SPBC19C2.01	ATP-dependent RNA helicase Cdc28	GO:0008380	RNA splicing	BP	1	0.252546	1	5.87683	curated	FALSE	TRUE	FALSE
SPAC16A10.04	Rho family GTPase Rho4	GO:0032956	regulation of actin cytoskeleton organization	BP	1	0.114053	1	5.92129	experimental	FALSE	TRUE	FALSE
SPAC1687.11	rRNA methyltransferase Spb1 (predicted)	GO:0043414	macromolecule methylation	BP	1	0.384929	1	6.14443	automatic	FALSE	TRUE	FALSE
SPAC1687.11	rRNA methyltransferase Spb1 (predicted)	GO:0009451	RNA modification	BP	1	0.525458	1	5.68012	automatic	FALSE	TRUE	FALSE
SPAC1687.11	rRNA methyltransferase Spb1 (predicted)	GO:0032259	methylation	BP	1	0.413442	1	6.14443	automatic	FALSE	TRUE	FALSE
SPAC14C4.02c	Smc5-6 complex SMC P-loop ATPase subunit Smc5	GO:0006310	DNA recombination	BP	1	0.193483	1	5.63816	automatic	FALSE	TRUE	FALSE
SPAC14C4.02c	Smc5-6 complex SMC P-loop ATPase subunit Smc5	GO:0006281	DNA repair	BP	1	0.423625	1	5.09234	curated	FALSE	TRUE	FALSE
SPCC1183.05c	DNA repair ligase Lig4	GO:0006310	DNA recombination	BP	1	0.191446	1	5.63816	automatic	FALSE	TRUE	FALSE
SPAC3H5.06c	DNA polymerase alpha catalytic subunit	GO:0006281	DNA repair	BP	1	0.207739	1	5.09234	experimental	FALSE	TRUE	FALSE
SPAC1006.09	MAP kinase kinase kinase Win1	GO:0070887	cellular response to chemical stimulus	BP	1	0.118126	1	5.64503	experimental	FALSE	TRUE	FALSE
SPAC1B3.15c	transmembrane transporter (predicted)	GO:0098656	anion transmembrane transport	BP	1	0.175153	1	5.70179		FALSE	FALSE	FALSE
SPAC1B3.15c	transmembrane transporter (predicted)	GO:1903825	organic acid transmembrane transport	BP	1	0.224033	1	6.12196		FALSE	FALSE	FALSE
SPAC1B3.15c	transmembrane transporter (predicted)	GO:0015849	organic acid transport	BP	1	0.162933	1	6.11091		FALSE	FALSE	FALSE
SPAC1B3.15c	transmembrane transporter (predicted)	GO:0046942	carboxylic acid transport	BP	1	0.189409	1	6.11091		FALSE	FALSE	FALSE
SPAC1B3.15c	transmembrane transporter (predicted)	GO:0006820	anion transport	BP	1	0.209776	1	5.55286		FALSE	FALSE	FALSE
SPAC1B3.15c	transmembrane transporter (predicted)	GO:0015711	organic anion transport	BP	1	0.177189	1	5.69451		FALSE	FALSE	FALSE
SPCC1259.15c	ubiquitin conjugating enzyme E2, Ubc11/UbcP4	GO:0006511	ubiquitin-dependent protein catabolic process	BP	1	0.264766	1	5.25113	experimental	FALSE	TRUE	FALSE
SPAC644.18c	TRAPP complex subunit Bet3 (predicted)	GO:0007034	vacuolar transport	BP	1	0.14053	1	5.68729		FALSE	TRUE	FALSE
SPAC57A10.03	cyclophilin family peptidyl-prolyl cis-trans isomerase Cyp1	GO:0000398	mRNA splicing, via spliceosome	BP	1	0.276986	1	5.91224		FALSE	TRUE	FALSE
SPAC57A10.03	cyclophilin family peptidyl-prolyl cis-trans isomerase Cyp1	GO:0000377	RNA splicing, via transesterification reactions with bulged adenosine as nucleophile	BP	1	0.260692	1	5.91224		FALSE	TRUE	FALSE
SPAC57A10.03	cyclophilin family peptidyl-prolyl cis-trans isomerase Cyp1	GO:0008380	RNA splicing	BP	1	0.279022	1	5.87683		FALSE	TRUE	FALSE
SPAC57A10.03	cyclophilin family peptidyl-prolyl cis-trans isomerase Cyp1	GO:0000375	RNA splicing, via transesterification reactions	BP	1	0.313646	1	5.89438		FALSE	TRUE	FALSE
SPAC2G11.11c	ATP-dependent RNA helicase Prh1 (predicted)	GO:0000398	mRNA splicing, via spliceosome	BP	1	0.211813	1	5.91224		FALSE	TRUE	FALSE
SPAC2G11.11c	ATP-dependent RNA helicase Prh1 (predicted)	GO:0006397	mRNA processing	BP	1	0.187373	1	5.63816		FALSE	TRUE	FALSE
SPAC2G11.11c	ATP-dependent RNA helicase Prh1 (predicted)	GO:0000377	RNA splicing, via transesterification reactions with bulged adenosine as nucleophile	BP	1	0.197556	1	5.91224		FALSE	TRUE	FALSE
SPAC2G11.11c	ATP-dependent RNA helicase Prh1 (predicted)	GO:0008380	RNA splicing	BP	1	0.138493	1	5.87683		FALSE	TRUE	FALSE
SPCC1020.03	mitochondrial iron ion transmembrane transporter Mmt1 (predicted)	GO:0048878	chemical homeostasis	BP	1	0.1222	1	6.00665		FALSE	FALSE	FALSE
SPCC1020.03	mitochondrial iron ion transmembrane transporter Mmt1 (predicted)	GO:0019725	cellular homeostasis	BP	1	0.234216	1	5.90327		FALSE	FALSE	FALSE
SPCC1020.03	mitochondrial iron ion transmembrane transporter Mmt1 (predicted)	GO:0030003	cellular cation homeostasis	BP	1	0.142566	1	6.16742		FALSE	FALSE	FALSE
SPCC1020.03	mitochondrial iron ion transmembrane transporter Mmt1 (predicted)	GO:0055080	cation homeostasis	BP	1	0.189409	1	6.08917		FALSE	FALSE	FALSE
SPCC1020.03	mitochondrial iron ion transmembrane transporter Mmt1 (predicted)	GO:0006873	cellular ion homeostasis	BP	1	0.148676	1	6.13313		FALSE	FALSE	FALSE
SPCC1020.03	mitochondrial iron ion transmembrane transporter Mmt1 (predicted)	GO:0050801	ion homeostasis	BP	1	0.126273	1	6.0368		FALSE	FALSE	FALSE
SPCC1020.03	mitochondrial iron ion transmembrane transporter Mmt1 (predicted)	GO:0055082	cellular chemical homeostasis	BP	1	0.232179	1	6.09998		FALSE	FALSE	FALSE
SPCC1020.03	mitochondrial iron ion transmembrane transporter Mmt1 (predicted)	GO:0042592	homeostatic process	BP	1	0.120163	1	5.40141		FALSE	FALSE	FALSE
SPCC1020.03	mitochondrial iron ion transmembrane transporter Mmt1 (predicted)	GO:0098771	inorganic ion homeostasis	BP	1	0.203666	1	6.08917		FALSE	FALSE	FALSE
SPBC839.14c	elongation factor EF-1 alpha (eEF1A) l methyltransferase Efm4 (predicted)	GO:0043414	macromolecule methylation	BP	1	0.167006	1	6.14443		FALSE	TRUE	FALSE
SPBC839.14c	elongation factor EF-1 alpha (eEF1A) l methyltransferase Efm4 (predicted)	GO:0032259	methylation	BP	1	0.14053	1	6.14443		FALSE	TRUE	FALSE
SPCC417.10	dipeptide transmembrane transporter Dal5h1 (predicted)	GO:0046942	carboxylic acid transport	BP	1	0.213849	1	6.11091		FALSE	TRUE	FALSE
SPCC417.10	dipeptide transmembrane transporter Dal5h1 (predicted)	GO:0015711	organic anion transport	BP	1	0.238289	1	5.69451		FALSE	TRUE	FALSE
SPCC417.10	dipeptide transmembrane transporter Dal5h1 (predicted)	GO:0006820	anion transport	BP	1	0.323829	1	5.55286		FALSE	TRUE	FALSE
SPCC417.10	dipeptide transmembrane transporter Dal5h1 (predicted)	GO:0015849	organic acid transport	BP	1	0.203666	1	6.11091		FALSE	TRUE	FALSE
SPAC19A8.07c	U3 snoRNP-associated protein Imp4 (predicted)	GO:0006364	rRNA processing	BP	1	0.350305	1	5.35391	curated	FALSE	TRUE	FALSE
SPAC19A8.07c	U3 snoRNP-associated protein Imp4 (predicted)	GO:0044085	cellular component biogenesis	BP	1	0.101833	1	5.63133	curated	FALSE	TRUE	FALSE
SPAC3F10.16c	GTP binding protein, HSR1-related (predicted)	GO:0016072	rRNA metabolic process	BP	1	0.193483	1	5.21012		FALSE	TRUE	FALSE
SPCC576.15c	serine/threonine protein kinase Ksg1	GO:0035556	intracellular signal transduction	BP	1	0.344196	1	5.19242		FALSE	TRUE	FALSE
SPCC830.10	nucleoside triphosphatase Ham1 (predicted)	GO:0009259	ribonucleotide metabolic process	BP	1	0.10998	1	5.83427		FALSE	TRUE	FALSE
SPCC830.10	nucleoside triphosphatase Ham1 (predicted)	GO:0055086	nucleobase-containing small molecule metabolic process	BP	1	0.189409	1	5.04582	automatic	FALSE	TRUE	FALSE
SPCC830.10	nucleoside triphosphatase Ham1 (predicted)	GO:0006753	nucleoside phosphate metabolic process	BP	1	0.162933	1	5.36427	automatic	FALSE	TRUE	FALSE
SPCC830.10	nucleoside triphosphatase Ham1 (predicted)	GO:0009117	nucleotide metabolic process	BP	1	0.169043	1	5.41228		FALSE	TRUE	FALSE
SPCC830.10	nucleoside triphosphatase Ham1 (predicted)	GO:0019693	ribose phosphate metabolic process	BP	1	0.1222	1	5.80958		FALSE	TRUE	FALSE
SPCC61.01c	plasma membrane siderophore-iron transmembrane transporter Str2	GO:0006812	cation transport	BP	1	0.11609	1	5.38532	curated	FALSE	FALSE	FALSE
SPCC757.13	dipeptide transmembrane transporter (predicted)	GO:0046942	carboxylic acid transport	BP	1	0.156823	1	6.11091		FALSE	TRUE	FALSE
SPCC757.13	dipeptide transmembrane transporter (predicted)	GO:0015711	organic anion transport	BP	1	0.160896	1	5.69451		FALSE	TRUE	FALSE
SPCC757.13	dipeptide transmembrane transporter (predicted)	GO:0006820	anion transport	BP	1	0.205703	1	5.55286		FALSE	TRUE	FALSE
SPCC757.13	dipeptide transmembrane transporter (predicted)	GO:0015849	organic acid transport	BP	1	0.171079	1	6.11091		FALSE	TRUE	FALSE
SPBC1773.15	dipeptide transmembrane transporter Dal5h2 (predicted)	GO:0046942	carboxylic acid transport	BP	1	0.191446	1	6.11091		FALSE	TRUE	FALSE
SPBC1773.15	dipeptide transmembrane transporter Dal5h2 (predicted)	GO:0015711	organic anion transport	BP	1	0.175153	1	5.69451		FALSE	TRUE	FALSE
SPBC1773.15	dipeptide transmembrane transporter Dal5h2 (predicted)	GO:0006820	anion transport	BP	1	0.181263	1	5.55286		FALSE	TRUE	FALSE
SPBC1773.15	dipeptide transmembrane transporter Dal5h2 (predicted)	GO:0015849	organic acid transport	BP	1	0.14664	1	6.11091		FALSE	TRUE	FALSE
SPCC1840.05c	phosphoglucomutase (predicted)	GO:0055086	nucleobase-containing small molecule metabolic process	BP	1	0.281059	1	5.04582		FALSE	TRUE	FALSE
SPCC1840.05c	phosphoglucomutase (predicted)	GO:1901137	carbohydrate derivative biosynthetic process	BP	1	0.242363	1	5.45698		FALSE	TRUE	FALSE
SPBC460.05	transmembrane transporter (predicted)	GO:0046942	carboxylic acid transport	BP	1	0.162933	1	6.11091		FALSE	TRUE	FALSE
SPBC460.05	transmembrane transporter (predicted)	GO:0015711	organic anion transport	BP	1	0.219959	1	5.69451		FALSE	TRUE	FALSE
SPBC460.05	transmembrane transporter (predicted)	GO:0006820	anion transport	BP	1	0.254582	1	5.55286		FALSE	TRUE	FALSE
SPBC460.05	transmembrane transporter (predicted)	GO:0015849	organic acid transport	BP	1	0.14053	1	6.11091		FALSE	TRUE	FALSE
SPAC227.07c	protein phosphatase PP2A regulatory subunit B-55 Pab1	GO:0033044	regulation of chromosome organization	BP	1	0.112016	1	5.17073		FALSE	TRUE	FALSE
SPBPB2B2.05	class I glutamine amidotransferase family protein	GO:1901565	organonitrogen compound catabolic process	BP	1	0.101833	1	5.06108		FALSE	FALSE	TRUE
SPAC6G9.05	coenzyme A diphosphatase (predicted)	GO:0009259	ribonucleotide metabolic process	BP	1	0.112016	1	5.83427		FALSE	TRUE	FALSE
SPAC6G9.05	coenzyme A diphosphatase (predicted)	GO:0009150	purine ribonucleotide metabolic process	BP	1	0.124236	1	6.0368		FALSE	TRUE	FALSE
SPAC6G9.05	coenzyme A diphosphatase (predicted)	GO:1901565	organonitrogen compound catabolic process	BP	1	0.187373	1	5.06108		FALSE	TRUE	FALSE
SPAC6G9.05	coenzyme A diphosphatase (predicted)	GO:0072521	purine-containing compound metabolic process	BP	1	0.175153	1	5.68729		FALSE	TRUE	FALSE
SPAC6G9.05	coenzyme A diphosphatase (predicted)	GO:0006732	obsolete coenzyme metabolic process	BP	1	0.189409	1	10.6218		FALSE	TRUE	FALSE
SPAC6G9.05	coenzyme A diphosphatase (predicted)	GO:0055086	nucleobase-containing small molecule metabolic process	BP	1	0.305499	1	5.04582	automatic	FALSE	TRUE	FALSE
SPAC6G9.05	coenzyme A diphosphatase (predicted)	GO:0019439	aromatic compound catabolic process	BP	1	0.285132	1	5.1495		FALSE	TRUE	FALSE
SPAC6G9.05	coenzyme A diphosphatase (predicted)	GO:1901361	organic cyclic compound catabolic process	BP	1	0.238289	1	5.1246		FALSE	TRUE	FALSE
SPAC6G9.05	coenzyme A diphosphatase (predicted)	GO:0051186	obsolete cofactor metabolic process	BP	1	0.213849	1	10.6218		FALSE	TRUE	FALSE
SPAC6G9.05	coenzyme A diphosphatase (predicted)	GO:0044270	cellular nitrogen compound catabolic process	BP	1	0.301426	1	5.13697		FALSE	TRUE	FALSE
SPAC6G9.05	coenzyme A diphosphatase (predicted)	GO:0034655	nucleobase-containing compound catabolic process	BP	1	0.217923	1	5.18804		FALSE	TRUE	FALSE
SPAC6G9.05	coenzyme A diphosphatase (predicted)	GO:0046700	heterocycle catabolic process	BP	1	0.266802	1	5.13283		FALSE	TRUE	FALSE
SPAC6G9.05	coenzyme A diphosphatase (predicted)	GO:0006753	nucleoside phosphate metabolic process	BP	1	0.258656	1	5.36427	automatic	FALSE	TRUE	FALSE
SPAC6G9.05	coenzyme A diphosphatase (predicted)	GO:0009117	nucleotide metabolic process	BP	1	0.201629	1	5.41228		FALSE	TRUE	FALSE
SPCC1183.07	U3 snoRNP-associated protein Rrp5 (predicted)	GO:0006364	rRNA processing	BP	1	0.105906	1	5.35391	curated	FALSE	TRUE	FALSE
SPCC1223.03c	glycerol-3-phosphate dehydrogenase Gut2 (predicted)	GO:0005975	carbohydrate metabolic process	BP	1	0.132383	1	5.57191	automatic	FALSE	TRUE	FALSE
SPBC1539.03c	argininosuccinate lyase (predicted)	GO:1901605	alpha-amino acid metabolic process	BP	1	0.600815	1	5.17073	automatic	FALSE	TRUE	FALSE
SPBC800.06	ribosome biogenesis protein Brx1 (predicted)	GO:0034622	cellular protein-containing complex assembly	BP	1	0.14053	1	5.05342		FALSE	TRUE	FALSE
SPBC800.06	ribosome biogenesis protein Brx1 (predicted)	GO:0071826	ribonucleoprotein complex subunit organization	BP	1	0.148676	1	5.92129		FALSE	TRUE	FALSE
SPBC800.06	ribosome biogenesis protein Brx1 (predicted)	GO:0065003	protein-containing complex assembly	BP	1	0.138493	1	5.03827		FALSE	TRUE	FALSE
SPBC11B10.10c	histone H2A variant H2A.Z, Pht1	GO:0097549	chromatin organization involved in negative regulation of transcription	BP	1	0.10387	1	5.66594		FALSE	TRUE	FALSE
SPBC11B10.10c	histone H2A variant H2A.Z, Pht1	GO:2000113	negative regulation of cellular macromolecule biosynthetic process	BP	1	0.148676	1	5.10834		FALSE	TRUE	FALSE
SPBC11B10.10c	histone H2A variant H2A.Z, Pht1	GO:0009890	negative regulation of biosynthetic process	BP	1	0.12831	1	5.04204		FALSE	TRUE	FALSE
SPBC11B10.10c	histone H2A variant H2A.Z, Pht1	GO:0051172	negative regulation of nitrogen compound metabolic process	BP	1	0.130346	1	5.01229		FALSE	TRUE	FALSE
SPBC11B10.10c	histone H2A variant H2A.Z, Pht1	GO:0051253	negative regulation of RNA metabolic process	BP	1	0.124236	1	5.38002		FALSE	TRUE	FALSE
SPBC11B10.10c	histone H2A variant H2A.Z, Pht1	GO:0045934	negative regulation of nucleobase-containing compound metabolic process	BP	1	0.126273	1	5.21459		FALSE	TRUE	FALSE
SPBC11B10.10c	histone H2A variant H2A.Z, Pht1	GO:1903507	negative regulation of nucleic acid-templated transcription	BP	1	0.112016	1	5.42327		FALSE	TRUE	FALSE
SPBC11B10.10c	histone H2A variant H2A.Z, Pht1	GO:0031327	negative regulation of cellular biosynthetic process	BP	1	0.126273	1	5.04204		FALSE	TRUE	FALSE
SPBC11B10.10c	histone H2A variant H2A.Z, Pht1	GO:0045892	negative regulation of transcription, DNA-templated	BP	1	0.11609	1	5.42327		FALSE	TRUE	FALSE
SPBC11B10.10c	histone H2A variant H2A.Z, Pht1	GO:0010558	negative regulation of macromolecule biosynthetic process	BP	1	0.156823	1	5.10834		FALSE	TRUE	FALSE
SPAC222.06	nuclear HMG-like acidic protein Mak16 (predicted)	GO:0006364	rRNA processing	BP	1	0.126273	1	5.35391		FALSE	TRUE	FALSE
SPAC222.06	nuclear HMG-like acidic protein Mak16 (predicted)	GO:0016072	rRNA metabolic process	BP	1	0.505092	1	5.21012		FALSE	TRUE	FALSE
SPCC622.09	histone H2B Htb1	GO:1902679	negative regulation of RNA biosynthetic process	BP	1	0.101833	1	5.42327		FALSE	TRUE	FALSE
SPCC622.09	histone H2B Htb1	GO:2000113	negative regulation of cellular macromolecule biosynthetic process	BP	1	0.177189	1	5.10834		FALSE	TRUE	FALSE
SPCC622.09	histone H2B Htb1	GO:0009890	negative regulation of biosynthetic process	BP	1	0.169043	1	5.04204		FALSE	TRUE	FALSE
SPCC622.09	histone H2B Htb1	GO:0045934	negative regulation of nucleobase-containing compound metabolic process	BP	1	0.118126	1	5.21459		FALSE	TRUE	FALSE
SPCC622.09	histone H2B Htb1	GO:0031327	negative regulation of cellular biosynthetic process	BP	1	0.138493	1	5.04204		FALSE	TRUE	FALSE
SPCC622.09	histone H2B Htb1	GO:0010558	negative regulation of macromolecule biosynthetic process	BP	1	0.158859	1	5.10834		FALSE	TRUE	FALSE
SPCC1795.01c	mitotic spindle checkpoint protein Mad3	GO:2001252	positive regulation of chromosome organization	BP	1	0.293279	1	6.08917		FALSE	TRUE	FALSE
SPCC1795.01c	mitotic spindle checkpoint protein Mad3	GO:0010638	positive regulation of organelle organization	BP	1	0.264766	1	5.54659		FALSE	TRUE	FALSE
SPCC1795.01c	mitotic spindle checkpoint protein Mad3	GO:0051130	positive regulation of cellular component organization	BP	1	0.244399	1	5.36427		FALSE	TRUE	FALSE
SPAC1142.02c	TPR repeat protein, SGT2 family (predicted)	GO:0006605	protein targeting	BP	1	0.120163	1	6.57872		FALSE	TRUE	FALSE
SPBC27B12.12c	CorA family magnesium ion transmembrane transporter (predicted)	GO:0098660	inorganic ion transmembrane transport	BP	1	0.101833	1	5.79345	curated	FALSE	FALSE	FALSE
SPBC27B12.12c	CorA family magnesium ion transmembrane transporter (predicted)	GO:0098655	cation transmembrane transport	BP	1	0.118126	1	5.46271	curated	FALSE	FALSE	FALSE
SPAC144.12	ribose 5-phosphate isomerase Rki1 (predicted)	GO:0017144	drug metabolic process	BP	1	0.14664	1	10.6218		FALSE	TRUE	FALSE
SPAC13C5.05c	N-acetylglucosamine-phosphate mutase (predicted)	GO:1901137	carbohydrate derivative biosynthetic process	BP	1	0.311609	1	5.45698	automatic	FALSE	TRUE	FALSE
SPCC794.01c	glucose dehydrogenase Gcd1	GO:0005975	carbohydrate metabolic process	BP	1	0.254582	1	5.57191	automatic	FALSE	TRUE	FALSE
SPCC794.01c	glucose dehydrogenase Gcd1	GO:0006091	generation of precursor metabolites and energy	BP	1	0.364562	1	5.97738	automatic	FALSE	TRUE	FALSE
SPCC794.01c	glucose dehydrogenase Gcd1	GO:0055114	oxidation-reduction process	BP	1	0.264766	1	6.21505	automatic	FALSE	TRUE	FALSE
SPAC8C9.05	D-Tyr-tRNA deacylase Dtd1 (predicted)	GO:0006399	tRNA metabolic process	BP	1	0.105906	1	5.55286	curated	FALSE	TRUE	FALSE
SPAC2F7.05c	translation initiation factor eIF5, Tif5(predicted)	GO:0034622	cellular protein-containing complex assembly	BP	1	0.107943	1	5.05342		FALSE	TRUE	FALSE
SPAC2F7.05c	translation initiation factor eIF5, Tif5(predicted)	GO:0071826	ribonucleoprotein complex subunit organization	BP	1	0.11609	1	5.92129		FALSE	TRUE	FALSE
SPAC2F7.05c	translation initiation factor eIF5, Tif5(predicted)	GO:0065003	protein-containing complex assembly	BP	1	0.105906	1	5.03827		FALSE	TRUE	FALSE
SPBC25B2.05	rRNA processing protein Mis3	GO:0006364	rRNA processing	BP	1	0.423625	1	5.35391	experimental	FALSE	TRUE	FALSE
SPAC1250.03	ubiquitin conjugating enzyme E2 for HECT-type and RBR family E3 Ub ligases, Ubc14 (predicted)	GO:0043161	proteasome-mediated ubiquitin-dependent protein catabolic process	BP	1	0.366599	1	5.4978		FALSE	TRUE	FALSE
SPAC1250.03	ubiquitin conjugating enzyme E2 for HECT-type and RBR family E3 Ub ligases, Ubc14 (predicted)	GO:0030163	protein catabolic process	BP	1	0.409369	1	5.38002	curated	FALSE	TRUE	FALSE
SPAC1250.03	ubiquitin conjugating enzyme E2 for HECT-type and RBR family E3 Ub ligases, Ubc14 (predicted)	GO:0010498	proteasomal protein catabolic process	BP	1	0.511202	1	5.46271		FALSE	TRUE	FALSE
SPAC1250.03	ubiquitin conjugating enzyme E2 for HECT-type and RBR family E3 Ub ligases, Ubc14 (predicted)	GO:1901565	organonitrogen compound catabolic process	BP	1	0.435845	1	5.06108	curated	FALSE	TRUE	FALSE
SPAC1250.03	ubiquitin conjugating enzyme E2 for HECT-type and RBR family E3 Ub ligases, Ubc14 (predicted)	GO:0006511	ubiquitin-dependent protein catabolic process	BP	1	0.419552	1	5.25113	curated	FALSE	TRUE	FALSE
SPBC713.06	DNA ligase (predicted)	GO:0006281	DNA repair	BP	1	0.478615	1	5.09234	automatic	FALSE	TRUE	FALSE
SPBC23G7.05	translation initiation factor eIF1	GO:0034622	cellular protein-containing complex assembly	BP	1	0.124236	1	5.05342		FALSE	TRUE	FALSE
SPBC1734.15	RSC complex subunit Rsc4	GO:0051253	negative regulation of RNA metabolic process	BP	1	0.118126	1	5.38002		FALSE	TRUE	FALSE
SPBC1734.15	RSC complex subunit Rsc4	GO:0045934	negative regulation of nucleobase-containing compound metabolic process	BP	1	0.136456	1	5.21459		FALSE	TRUE	FALSE
SPBC1734.15	RSC complex subunit Rsc4	GO:1903507	negative regulation of nucleic acid-templated transcription	BP	1	0.105906	1	5.42327		FALSE	TRUE	FALSE
SPBC1734.15	RSC complex subunit Rsc4	GO:0045892	negative regulation of transcription, DNA-templated	BP	1	0.120163	1	5.42327		FALSE	TRUE	FALSE
SPBC1734.15	RSC complex subunit Rsc4	GO:0010558	negative regulation of macromolecule biosynthetic process	BP	1	0.12831	1	5.10834		FALSE	TRUE	FALSE
SPBC1734.15	RSC complex subunit Rsc4	GO:2000113	negative regulation of cellular macromolecule biosynthetic process	BP	1	0.177189	1	5.10834		FALSE	TRUE	FALSE
SPBC1734.15	RSC complex subunit Rsc4	GO:0009890	negative regulation of biosynthetic process	BP	1	0.11609	1	5.04204		FALSE	TRUE	FALSE
SPBC1734.15	RSC complex subunit Rsc4	GO:0031327	negative regulation of cellular biosynthetic process	BP	1	0.105906	1	5.04204		FALSE	TRUE	FALSE
SPBC1734.15	RSC complex subunit Rsc4	GO:0071824	protein-DNA complex subunit organization	BP	1	0.197556	1	5.89438		FALSE	TRUE	FALSE
SPBC1734.15	RSC complex subunit Rsc4	GO:0034728	nucleosome organization	BP	1	0.118126	1	6.23974		FALSE	TRUE	FALSE
SPBC1734.15	RSC complex subunit Rsc4	GO:0006338	chromatin remodeling	BP	1	0.203666	1	5.1246	curated	FALSE	TRUE	FALSE
SPAC31A2.02	eRF1 methyltransferase complex and tRNA (m2G10) methyltransferase complex regulatory subunit Trm112 (predicted)	GO:0006364	rRNA processing	BP	1	0.114053	1	5.35391		FALSE	TRUE	FALSE
SPAC31A2.02	eRF1 methyltransferase complex and tRNA (m2G10) methyltransferase complex regulatory subunit Trm112 (predicted)	GO:0016072	rRNA metabolic process	BP	1	0.142566	1	5.21012		FALSE	TRUE	FALSE
SPAC31A2.02	eRF1 methyltransferase complex and tRNA (m2G10) methyltransferase complex regulatory subunit Trm112 (predicted)	GO:0022613	ribonucleoprotein complex biogenesis	BP	1	0.160896	1	5.93042		FALSE	TRUE	FALSE
SPAC31A2.02	eRF1 methyltransferase complex and tRNA (m2G10) methyltransferase complex regulatory subunit Trm112 (predicted)	GO:0044085	cellular component biogenesis	BP	1	0.130346	1	5.63133		FALSE	TRUE	FALSE
SPAC2C4.11c	KH domain RNA-binding protein Pno1 (predicted)	GO:0006364	rRNA processing	BP	1	0.289206	1	5.35391	curated	FALSE	TRUE	FALSE
SPAC1556.04c	cytidine deaminase Ccd1 (predicted)	GO:0055086	nucleobase-containing small molecule metabolic process	BP	1	0.260692	1	5.04582	automatic	FALSE	TRUE	FALSE
SPAC1556.04c	cytidine deaminase Ccd1 (predicted)	GO:0044270	cellular nitrogen compound catabolic process	BP	1	0.11609	1	5.13697	automatic	FALSE	TRUE	FALSE
SPAC1556.04c	cytidine deaminase Ccd1 (predicted)	GO:1901565	organonitrogen compound catabolic process	BP	1	0.10998	1	5.06108	automatic	FALSE	TRUE	FALSE
SPAC1556.04c	cytidine deaminase Ccd1 (predicted)	GO:0046700	heterocycle catabolic process	BP	1	0.112016	1	5.13283	automatic	FALSE	TRUE	FALSE
SPAC1556.04c	cytidine deaminase Ccd1 (predicted)	GO:0044282	small molecule catabolic process	BP	1	0.101833	1	6.00665	automatic	FALSE	TRUE	FALSE
SPAC1556.04c	cytidine deaminase Ccd1 (predicted)	GO:1901361	organic cyclic compound catabolic process	BP	1	0.124236	1	5.1246	automatic	FALSE	TRUE	FALSE
SPBC3D6.08c	mRNA decapping complex subunit (predicted)	GO:0006397	mRNA processing	BP	1	0.244399	1	5.63816		FALSE	TRUE	FALSE
SPBP22H7.02c	ribosome biogenesis RNA-binding protein Mrd1 (predicted)	GO:0006364	rRNA processing	BP	1	0.211813	1	5.35391	curated	FALSE	TRUE	FALSE
SPCC320.11c	RNA-binding ribosome biogenesis protein Nip7 (predicted)	GO:0006364	rRNA processing	BP	1	0.13442	1	5.35391		FALSE	TRUE	FALSE
SPCC320.11c	RNA-binding ribosome biogenesis protein Nip7 (predicted)	GO:0016072	rRNA metabolic process	BP	1	0.285132	1	5.21012		FALSE	TRUE	FALSE
SPCC320.11c	RNA-binding ribosome biogenesis protein Nip7 (predicted)	GO:0022613	ribonucleoprotein complex biogenesis	BP	1	0.232179	1	5.93042	curated	FALSE	TRUE	FALSE
SPCC320.11c	RNA-binding ribosome biogenesis protein Nip7 (predicted)	GO:0044085	cellular component biogenesis	BP	1	0.158859	1	5.63133	curated	FALSE	TRUE	FALSE
SPCP1E11.08	ribosome biogenesis protein Nsa2 (predicted)	GO:0006364	rRNA processing	BP	1	0.270876	1	5.35391		FALSE	TRUE	FALSE
SPCP1E11.08	ribosome biogenesis protein Nsa2 (predicted)	GO:0016072	rRNA metabolic process	BP	1	0.362525	1	5.21012		FALSE	TRUE	FALSE
SPAC343.09	UBX domain protein Ubx3, Cdc48 cofactor	GO:0043161	proteasome-mediated ubiquitin-dependent protein catabolic process	BP	1	0.189409	1	5.4978	experimental	FALSE	TRUE	FALSE
SPAC57A10.05c	F-box/WD repeat protein Pof1	GO:0042221	response to chemical	BP	1	0.142566	1	5.41228		FALSE	TRUE	FALSE
SPAC2C4.15c	UBX domain protein Ubx2	GO:0043161	proteasome-mediated ubiquitin-dependent protein catabolic process	BP	1	0.185336	1	5.4978	experimental	FALSE	TRUE	FALSE
SPAC19A8.13	U1 snRNP-associated protein Usp101	GO:0000398	mRNA splicing, via spliceosome	BP	1	0.384929	1	5.91224	curated	FALSE	TRUE	FALSE
SPAC19A8.13	U1 snRNP-associated protein Usp101	GO:0006397	mRNA processing	BP	1	0.450102	1	5.63816	curated	FALSE	TRUE	FALSE
SPAC19A8.13	U1 snRNP-associated protein Usp101	GO:0000377	RNA splicing, via transesterification reactions with bulged adenosine as nucleophile	BP	1	0.303462	1	5.91224	curated	FALSE	TRUE	FALSE
SPAC19A8.13	U1 snRNP-associated protein Usp101	GO:0008380	RNA splicing	BP	1	0.325866	1	5.87683	curated	FALSE	TRUE	FALSE
SPAC19A8.13	U1 snRNP-associated protein Usp101	GO:0000375	RNA splicing, via transesterification reactions	BP	1	0.301426	1	5.89438	curated	FALSE	TRUE	FALSE
SPBC4F6.10	guanyl-nucleotide exchange factor Vps902	GO:0007034	vacuolar transport	BP	1	0.211813	1	5.68729		FALSE	TRUE	FALSE
SPBC4F6.10	guanyl-nucleotide exchange factor Vps902	GO:0048193	Golgi vesicle transport	BP	1	0.191446	1	5.60449		FALSE	TRUE	FALSE
SPAC1296.02	cytochrome c oxidase subunit IV (predicted)	GO:0065003	protein-containing complex assembly	BP	1	0.130346	1	5.03827		FALSE	TRUE	FALSE
SPAC1296.02	cytochrome c oxidase subunit IV (predicted)	GO:0034622	cellular protein-containing complex assembly	BP	1	0.126273	1	5.05342		FALSE	TRUE	FALSE
SPAC521.05	40S ribosomal protein S8 (predicted)	GO:0016072	rRNA metabolic process	BP	1	0.114053	1	5.21012		FALSE	TRUE	FALSE
SPBC2G5.06c	sulfide-quinone oxidoreductase	GO:0017144	drug metabolic process	BP	1	0.171079	1	10.6218		FALSE	TRUE	FALSE
SPAC1486.09	ribosome biogenesis protein Nob1 (predicted)	GO:0006364	rRNA processing	BP	1	0.191446	1	5.35391	curated	FALSE	TRUE	FALSE
SPAC1486.09	ribosome biogenesis protein Nob1 (predicted)	GO:0016072	rRNA metabolic process	BP	1	0.313646	1	5.21012	curated	FALSE	TRUE	FALSE
SPBC1289.16c	copper amine oxidase-like protein Cao2	GO:0030003	cellular cation homeostasis	BP	1	0.107943	1	6.16742		FALSE	TRUE	FALSE
SPBC1289.16c	copper amine oxidase-like protein Cao2	GO:0055080	cation homeostasis	BP	1	0.10387	1	6.08917		FALSE	TRUE	FALSE
SPBC1289.16c	copper amine oxidase-like protein Cao2	GO:1901565	organonitrogen compound catabolic process	BP	1	0.12831	1	5.06108		FALSE	TRUE	FALSE
SPAC343.03	anaphase-promoting complex ubiquitin -protein ligase E3 subunit Apc11	GO:0043161	proteasome-mediated ubiquitin-dependent protein catabolic process	BP	1	0.313646	1	5.4978	curated	FALSE	TRUE	FALSE
SPAC20G8.04c	mitochondrial electron transfer flavoprotein-ubiquinone oxidoreductase Cir2 (predicted)	GO:1901605	alpha-amino acid metabolic process	BP	1	0.126273	1	5.17073		FALSE	TRUE	FALSE
SPAC19D5.05c	U3 snoRNP-associated protein Imp3 (predicted)	GO:0006364	rRNA processing	BP	1	0.120163	1	5.35391	curated	FALSE	TRUE	FALSE
SPAC19D5.05c	U3 snoRNP-associated protein Imp3 (predicted)	GO:0022613	ribonucleoprotein complex biogenesis	BP	1	0.217923	1	5.93042	curated	FALSE	TRUE	FALSE
SPAC19D5.05c	U3 snoRNP-associated protein Imp3 (predicted)	GO:0044085	cellular component biogenesis	BP	1	0.254582	1	5.63133	curated	FALSE	TRUE	FALSE
SPCC297.03	Ca2+/calmodulin-dependent (CaMMK)-like protein kinase Ssp1	GO:0016310	phosphorylation	BP	1	0.171079	1	5.97738		FALSE	TRUE	FALSE
SPAC31G5.08	uroporphyrinogen-III synthase Ups	GO:0051186	obsolete cofactor metabolic process	BP	1	0.112016	1	10.6218		FALSE	TRUE	FALSE
SPAC31G5.08	uroporphyrinogen-III synthase Ups	GO:0051188	obsolete cofactor biosynthetic process	BP	1	0.114053	1	10.6218		FALSE	TRUE	FALSE
SPAC1002.04c	transcription factor TFIID complex subunit Taf11 (predicted)	GO:0071824	protein-DNA complex subunit organization	BP	1	0.13442	1	5.89438		FALSE	TRUE	FALSE
SPAC1002.04c	transcription factor TFIID complex subunit Taf11 (predicted)	GO:0034622	cellular protein-containing complex assembly	BP	1	0.183299	1	5.05342		FALSE	TRUE	FALSE
SPAC1002.04c	transcription factor TFIID complex subunit Taf11 (predicted)	GO:0065003	protein-containing complex assembly	BP	1	0.156823	1	5.03827		FALSE	TRUE	FALSE
SPBC1773.09c	DNAJ domain protein, exocytosis associated Mug184 (predicted)	GO:0022411	cellular component disassembly	BP	1	0.101833	1	6.49463		FALSE	TRUE	FALSE
SPBC3F6.05	RhoGAP, GTPase activating protein Rga1	GO:0008360	regulation of cell shape	BP	1	0.10998	1	6.04706	experimental	FALSE	FALSE	FALSE
SPBC3F6.05	RhoGAP, GTPase activating protein Rga1	GO:0030036	actin cytoskeleton organization	BP	1	0.158859	1	6.05742	experimental	FALSE	FALSE	FALSE
SPCC74.09	RNA-binding protein, rrm type	GO:2000241	regulation of reproductive process	BP	1	0.142566	1	5.1453		FALSE	FALSE	TRUE
SPCC74.09	RNA-binding protein, rrm type	GO:0046999	regulation of conjugation	BP	1	0.105906	1	5.87683		FALSE	FALSE	TRUE
SPCC74.09	RNA-binding protein, rrm type	GO:2000113	negative regulation of cellular macromolecule biosynthetic process	BP	1	0.156823	1	5.10834		FALSE	FALSE	TRUE
SPCC74.09	RNA-binding protein, rrm type	GO:0051172	negative regulation of nitrogen compound metabolic process	BP	1	0.285132	1	5.01229		FALSE	FALSE	TRUE
SPCC74.09	RNA-binding protein, rrm type	GO:0031137	regulation of conjugation with cellular fusion	BP	1	0.142566	1	5.87683		FALSE	FALSE	TRUE
SPCC74.09	RNA-binding protein, rrm type	GO:0051253	negative regulation of RNA metabolic process	BP	1	0.230143	1	5.38002		FALSE	FALSE	TRUE
SPCC74.09	RNA-binding protein, rrm type	GO:2000242	negative regulation of reproductive process	BP	1	0.11609	1	6.22732		FALSE	FALSE	TRUE
SPCC74.09	RNA-binding protein, rrm type	GO:0043900	regulation of multi-organism process	BP	1	0.14664	1	5.60449		FALSE	FALSE	TRUE
SPCC74.09	RNA-binding protein, rrm type	GO:0045934	negative regulation of nucleobase-containing compound metabolic process	BP	1	0.164969	1	5.21459		FALSE	FALSE	TRUE
SPCC74.09	RNA-binding protein, rrm type	GO:1903507	negative regulation of nucleic acid-templated transcription	BP	1	0.10387	1	5.42327		FALSE	FALSE	TRUE
SPCC74.09	RNA-binding protein, rrm type	GO:0031327	negative regulation of cellular biosynthetic process	BP	1	0.142566	1	5.04204		FALSE	FALSE	TRUE
SPCC74.09	RNA-binding protein, rrm type	GO:0010558	negative regulation of macromolecule biosynthetic process	BP	1	0.130346	1	5.10834		FALSE	FALSE	TRUE
SPBC12D12.06	mediator complex cyclin subunit Srb11	GO:0043900	regulation of multi-organism process	BP	1	0.107943	1	5.60449		FALSE	TRUE	FALSE
SPAC12G12.06c	rRNA processing protein Rcl1 (predicted)	GO:0090305	nucleic acid phosphodiester bond hydrolysis	BP	1	0.105906	1	5.88557		FALSE	TRUE	FALSE
SPAC12G12.06c	rRNA processing protein Rcl1 (predicted)	GO:0006364	rRNA processing	BP	1	0.321792	1	5.35391	curated	FALSE	TRUE	FALSE
SPBC1861.07	elongin C (predicted)	GO:0006511	ubiquitin-dependent protein catabolic process	BP	1	0.130346	1	5.25113	automatic	FALSE	TRUE	FALSE
SPBC1861.07	elongin C (predicted)	GO:0043632	modification-dependent macromolecule catabolic process	BP	1	0.162933	1	5.05725	automatic	FALSE	TRUE	FALSE
SPBC1861.07	elongin C (predicted)	GO:0051603	proteolysis involved in cellular protein catabolic process	BP	1	0.136456	1	5.17073	automatic	FALSE	TRUE	FALSE
SPBC1861.07	elongin C (predicted)	GO:0019941	modification-dependent protein catabolic process	BP	1	0.138493	1	5.24649	automatic	FALSE	TRUE	FALSE
SPCC550.14	KH domain RNA binding protein, vigilin (predicted)	GO:0010608	posttranscriptional regulation of gene expression	BP	1	0.10387	1	6.43211		FALSE	TRUE	FALSE
SPBP35G2.09	U1 snRNP-associated protein Usp103	GO:0000398	mRNA splicing, via spliceosome	BP	1	0.551935	1	5.91224	curated	FALSE	TRUE	FALSE
SPBP35G2.09	U1 snRNP-associated protein Usp103	GO:0006397	mRNA processing	BP	1	0.511202	1	5.63816	curated	FALSE	TRUE	FALSE
SPBP35G2.09	U1 snRNP-associated protein Usp103	GO:0000377	RNA splicing, via transesterification reactions with bulged adenosine as nucleophile	BP	1	0.545825	1	5.91224	curated	FALSE	TRUE	FALSE
SPBP35G2.09	U1 snRNP-associated protein Usp103	GO:0008380	RNA splicing	BP	1	0.503055	1	5.87683	curated	FALSE	TRUE	FALSE
SPBP35G2.09	U1 snRNP-associated protein Usp103	GO:0000375	RNA splicing, via transesterification reactions	BP	1	0.519348	1	5.89438	curated	FALSE	TRUE	FALSE
SPCC1494.02c	transcription factor TFIID complex subunit Taf13 (predicted)	GO:0034622	cellular protein-containing complex assembly	BP	1	0.132383	1	5.05342		FALSE	TRUE	FALSE
SPCC1494.02c	transcription factor TFIID complex subunit Taf13 (predicted)	GO:0065003	protein-containing complex assembly	BP	1	0.10387	1	5.03827		FALSE	TRUE	FALSE
SPAC19G12.15c	trehalose-6-phosphate phosphatase Tpp1	GO:0003006	developmental process involved in reproduction	BP	1	0.112016	1	6.41707		FALSE	FALSE	FALSE
SPCC1682.01	ubiquinol-cytochrome-c reductase complex subunit 9 (predicted)	GO:0065003	protein-containing complex assembly	BP	1	0.10998	1	5.03827		FALSE	TRUE	FALSE
SPCC1682.01	ubiquinol-cytochrome-c reductase complex subunit 9 (predicted)	GO:0034622	cellular protein-containing complex assembly	BP	1	0.13442	1	5.05342		FALSE	TRUE	FALSE
SPAC4C5.01	pseudouridine-5'-phosphatase (predicted)	GO:0005975	carbohydrate metabolic process	BP	1	0.118126	1	5.57191		FALSE	TRUE	FALSE
SPAC1039.05c	transcription factor, zf-fungal binuclear cluster type Klf1	GO:0045944	positive regulation of transcription by RNA polymerase II	BP	1	0.105906	1	5.42327	experimental	FALSE	FALSE	FALSE
SPBPB8B6.02c	plasma membrane urea transmembrane transporter (predicted)	GO:0006812	cation transport	BP	1	0.10387	1	5.38532		FALSE	FALSE	FALSE
SPAC1F7.11c	transcription factor, zf-fungal binuclear cluster type (predicted)	GO:0009891	positive regulation of biosynthetic process	BP	1	0.169043	1	5.01596		FALSE	FALSE	FALSE
SPBC216.06c	replication fork protection complex subunit Swi1	GO:0010389	regulation of G2/M transition of mitotic cell cycle	BP	1	0.348269	1	5.82598	experimental	FALSE	TRUE	FALSE
SPBC216.06c	replication fork protection complex subunit Swi1	GO:0010948	negative regulation of cell cycle process	BP	1	0.372709	1	5.3335	experimental	FALSE	TRUE	FALSE
SPBC216.06c	replication fork protection complex subunit Swi1	GO:1902749	regulation of cell cycle G2/M phase transition	BP	1	0.219959	1	5.80148	experimental	FALSE	TRUE	FALSE
SPBC216.06c	replication fork protection complex subunit Swi1	GO:1901988	negative regulation of cell cycle phase transition	BP	1	0.276986	1	5.94894	experimental	FALSE	TRUE	FALSE
SPBC216.06c	replication fork protection complex subunit Swi1	GO:1901991	negative regulation of mitotic cell cycle phase transition	BP	1	0.291242	1	6.0368	experimental	FALSE	TRUE	FALSE
SPBC216.06c	replication fork protection complex subunit Swi1	GO:0045786	negative regulation of cell cycle	BP	1	0.272912	1	5.15371	experimental	FALSE	TRUE	FALSE
SPBC216.06c	replication fork protection complex subunit Swi1	GO:1901990	regulation of mitotic cell cycle phase transition	BP	1	0.307536	1	5.06494	experimental	FALSE	TRUE	FALSE
SPBC216.06c	replication fork protection complex subunit Swi1	GO:0045930	negative regulation of mitotic cell cycle	BP	1	0.295316	1	5.51582	experimental	FALSE	TRUE	FALSE
SPBC216.06c	replication fork protection complex subunit Swi1	GO:1901987	regulation of cell cycle phase transition	BP	1	0.228106	1	5.005	experimental	FALSE	TRUE	FALSE
SPCC18.08	mitochondrial lysine-tRNA ligase (predicted)	GO:0008033	tRNA processing	BP	1	0.148676	1	6.00665		FALSE	TRUE	FALSE
SPAC23D3.06c	nucleoporin, WD repeat Nup146	GO:0072594	establishment of protein localization to organelle	BP	1	0.144603	1	5.4978		FALSE	TRUE	FALSE
SPAC23H4.15	ribosome biogenesis protein Tsr1 (predicted)	GO:0006364	rRNA processing	BP	1	0.142566	1	5.35391	curated	FALSE	TRUE	FALSE
SPCC338.15	dolichyl-di-phosphooligosaccharide-protein glycotransferase subunit Wbp1 (predicted)	GO:0070085	glycosylation	BP	1	0.352342	1	6.29103	automatic	FALSE	TRUE	FALSE
SPAC26H5.08c	glucan beta-glucosidase Bgl2 (predicted)	GO:0071554	cell wall organization or biogenesis	BP	1	0.144603	1	6.37327	curated	FALSE	FALSE	FALSE
SPAC7D4.05	HAD superfamily hydrolase, unknown role	GO:0055086	nucleobase-containing small molecule metabolic process	BP	1	0.185336	1	5.04582		TRUE	TRUE	TRUE
SPAC22E12.01	Golgi phosphoenolpyruvate transmembrane transporter Pet3	GO:0015931	nucleobase-containing compound transport	BP	1	0.221996	1	6.02665		FALSE	TRUE	FALSE
SPAC2G11.02	ribosome biogenesis protein Urb2 (predicted)	GO:0016072	rRNA metabolic process	BP	1	0.148676	1	5.21012		FALSE	TRUE	FALSE
SPBC16A3.14	superoxide dismutase, mitochondrial ribosomal protein subunit (predicted)	GO:0070887	cellular response to chemical stimulus	BP	1	0.13442	1	5.64503	curated	FALSE	FALSE	FALSE
SPAC3H1.04c	mitochondrial inner membrane protein Mdm31	GO:0007005	mitochondrion organization	BP	1	0.11609	1	6.09998	automatic	FALSE	FALSE	FALSE
SPBC1A4.10c	mediator complex subunit Med14	GO:0032774	RNA biosynthetic process	BP	1	0.150713	1	5.5219	curated	FALSE	TRUE	FALSE
SPAC57A7.11	WD repeat protein, Raptor homolog Mip1	GO:0023051	regulation of signaling	BP	1	0.158859	1	5.78548		FALSE	TRUE	FALSE
SPAC57A7.11	WD repeat protein, Raptor homolog Mip1	GO:0010646	regulation of cell communication	BP	1	0.11609	1	5.69451		FALSE	TRUE	FALSE
SPAC57A7.11	WD repeat protein, Raptor homolog Mip1	GO:0048583	regulation of response to stimulus	BP	1	0.195519	1	5.42327		FALSE	TRUE	FALSE
SPAC57A7.11	WD repeat protein, Raptor homolog Mip1	GO:0009966	regulation of signal transduction	BP	1	0.118126	1	5.79345		FALSE	TRUE	FALSE
SPAC57A7.11	WD repeat protein, Raptor homolog Mip1	GO:1902531	regulation of intracellular signal transduction	BP	1	0.11609	1	6.0166		FALSE	TRUE	FALSE
SPAC12G12.16c	Fen1 family nuclease, XP-G family (predicted)	GO:0006310	DNA recombination	BP	1	0.1222	1	5.63816		FALSE	TRUE	FALSE
SPCC4G3.16	CMP deaminase family/ methyltransferase bifunctional enzyme involved in riboflavin biosynthesis and tRNA pseudouridine biosynthesis Rib2 (predicted)	GO:0017144	drug metabolic process	BP	1	0.215886	1	10.6218		FALSE	FALSE	FALSE
SPBC19G7.15	nucleoporin Nup44	GO:0072594	establishment of protein localization to organelle	BP	1	0.138493	1	5.4978		FALSE	TRUE	FALSE
SPBC19G7.15	nucleoporin Nup44	GO:0017038	protein import	BP	1	0.126273	1	6.27796		FALSE	TRUE	FALSE
SPAC3G9.15c	rRNA processing protein Fcf2 (predicted)	GO:0006364	rRNA processing	BP	1	0.13442	1	5.35391	curated	FALSE	TRUE	FALSE
SPBC29A3.08	elongin-A, F-box protein Pof4 (predicted)	GO:0032774	RNA biosynthetic process	BP	1	0.10998	1	5.5219	curated	FALSE	TRUE	FALSE
SPBC211.08c	exosome subunit Mtr3	GO:0032774	RNA biosynthetic process	BP	1	0.156823	1	5.5219		FALSE	TRUE	FALSE
SPCC1442.14c	adenosine 5'-monophosphoramidase (predicted)	GO:0009117	nucleotide metabolic process	BP	1	0.154786	1	5.41228	curated	FALSE	TRUE	FALSE
SPBC17A3.06	phosphoprotein phosphatase (predicted)	GO:0032268	regulation of cellular protein metabolic process	BP	1	0.264766	1	5.51582		FALSE	TRUE	FALSE
SPBC17A3.06	phosphoprotein phosphatase (predicted)	GO:0048583	regulation of response to stimulus	BP	1	0.126273	1	5.42327		FALSE	TRUE	FALSE
SPBC17A3.06	phosphoprotein phosphatase (predicted)	GO:0048585	negative regulation of response to stimulus	BP	1	0.160896	1	6.27796		FALSE	TRUE	FALSE
SPBC17A3.06	phosphoprotein phosphatase (predicted)	GO:0023051	regulation of signaling	BP	1	0.293279	1	5.78548		FALSE	TRUE	FALSE
SPBC17A3.06	phosphoprotein phosphatase (predicted)	GO:0051246	regulation of protein metabolic process	BP	1	0.201629	1	5.50377		FALSE	TRUE	FALSE
SPBC17A3.06	phosphoprotein phosphatase (predicted)	GO:0051174	regulation of phosphorus metabolic process	BP	1	0.193483	1	6.54423		FALSE	TRUE	FALSE
SPBC17A3.06	phosphoprotein phosphatase (predicted)	GO:0051172	negative regulation of nitrogen compound metabolic process	BP	1	0.199593	1	5.01229		FALSE	TRUE	FALSE
SPBC17A3.06	phosphoprotein phosphatase (predicted)	GO:1902531	regulation of intracellular signal transduction	BP	1	0.238289	1	6.0166		FALSE	TRUE	FALSE
SPBC17A3.06	phosphoprotein phosphatase (predicted)	GO:0031399	regulation of protein modification process	BP	1	0.230143	1	6.09998		FALSE	TRUE	FALSE
SPBC17A3.06	phosphoprotein phosphatase (predicted)	GO:0010646	regulation of cell communication	BP	1	0.268839	1	5.69451		FALSE	TRUE	FALSE
SPBC17A3.06	phosphoprotein phosphatase (predicted)	GO:0019220	regulation of phosphate metabolic process	BP	1	0.179226	1	6.54423		FALSE	TRUE	FALSE
SPBC17A3.06	phosphoprotein phosphatase (predicted)	GO:0009966	regulation of signal transduction	BP	1	0.266802	1	5.79345		FALSE	TRUE	FALSE
SPAC4G9.20c	mitochondrial carrier, glutamate/glycine (predicted)	GO:0098660	inorganic ion transmembrane transport	BP	1	0.101833	1	5.79345		FALSE	TRUE	FALSE
SPAC26A3.08	Sm snRNP core protein Smb1	GO:0006397	mRNA processing	BP	1	0.258656	1	5.63816	curated	FALSE	TRUE	FALSE
SPAC26A3.08	Sm snRNP core protein Smb1	GO:0000377	RNA splicing, via transesterification reactions with bulged adenosine as nucleophile	BP	1	0.293279	1	5.91224	curated	FALSE	TRUE	FALSE
SPAC26A3.08	Sm snRNP core protein Smb1	GO:0008380	RNA splicing	BP	1	0.219959	1	5.87683	curated	FALSE	TRUE	FALSE
SPAC26A3.08	Sm snRNP core protein Smb1	GO:0000398	mRNA splicing, via spliceosome	BP	1	0.185336	1	5.91224	curated	FALSE	TRUE	FALSE
SPAC26A3.08	Sm snRNP core protein Smb1	GO:0000375	RNA splicing, via transesterification reactions	BP	1	0.268839	1	5.89438	curated	FALSE	TRUE	FALSE
SPAC19E9.01c	nucleoporin Nup40	GO:1901990	regulation of mitotic cell cycle phase transition	BP	1	0.14664	1	5.06494		FALSE	TRUE	FALSE
SPAC19E9.01c	nucleoporin Nup40	GO:1901987	regulation of cell cycle phase transition	BP	1	0.144603	1	5.005		FALSE	TRUE	FALSE
SPAP14E8.03	SNARE Bos1 (predicted)	GO:0061024	membrane organization	BP	1	0.12831	1	5.68012		FALSE	TRUE	FALSE
SPBC1711.07	WD repeat protein Rrb1 (predicted)	GO:0016072	rRNA metabolic process	BP	1	0.309572	1	5.21012		FALSE	TRUE	FALSE
SPBC14F5.10c	ubiquitin-protein ligase E3, unknown biological role, implicated in protein catabolic process (predicted)	GO:0070647	protein modification by small protein conjugation or removal	BP	1	0.132383	1	5.28905	curated	TRUE	TRUE	TRUE
SPBC3D6.11c	SUMO-targeted ubiquitin-protein ligase E3 Slx8	GO:0070647	protein modification by small protein conjugation or removal	BP	1	0.221996	1	5.28905	experimental	FALSE	TRUE	FALSE
SPBC16G5.03	ubiquitin-protein ligase E3/SUMO transferase, Topors, possibly associated with DNA damage (predicted)	GO:0070647	protein modification by small protein conjugation or removal	BP	1	0.112016	1	5.28905	curated	FALSE	FALSE	FALSE
SPAC4F8.15	myo-inositol transmembrane transporter Itr1	GO:0015318	inorganic molecular entity transmembrane transporter activity	MF	1	0.488798	1	5.39602		FALSE	TRUE	FALSE
SPBC1271.10c	transmembrane transporter (predicted)	GO:0015318	inorganic molecular entity transmembrane transporter activity	MF	1	0.126273	1	5.39602		FALSE	FALSE	FALSE
SPBC1271.10c	transmembrane transporter (predicted)	GO:0015075	ion transmembrane transporter activity	MF	1	0.321792	1	5.26518		FALSE	FALSE	FALSE
SPBC1271.10c	transmembrane transporter (predicted)	GO:0008324	cation transmembrane transporter activity	MF	1	0.189409	1	5.72393		FALSE	FALSE	FALSE
SPBC1348.05	transmembrane transporter (predicted)	GO:0015075	ion transmembrane transporter activity	MF	1	0.297352	1	5.26518		FALSE	FALSE	FALSE
SPBC1348.05	transmembrane transporter (predicted)	GO:0015318	inorganic molecular entity transmembrane transporter activity	MF	1	0.276986	1	5.39602		FALSE	FALSE	FALSE
SPBC1348.05	transmembrane transporter (predicted)	GO:0008324	cation transmembrane transporter activity	MF	1	0.539715	1	5.72393		FALSE	FALSE	FALSE
SPBPB2B2.16c	transmembrane transporter (predicted)	GO:0015075	ion transmembrane transporter activity	MF	1	0.291242	1	5.26518		FALSE	FALSE	FALSE
SPBPB2B2.16c	transmembrane transporter (predicted)	GO:0015318	inorganic molecular entity transmembrane transporter activity	MF	1	0.132383	1	5.39602		FALSE	FALSE	FALSE
SPBPB2B2.16c	transmembrane transporter (predicted)	GO:0008324	cation transmembrane transporter activity	MF	1	0.533605	1	5.72393		FALSE	FALSE	FALSE
SPAC750.02c	transmembrane transporter (predicted)	GO:0015075	ion transmembrane transporter activity	MF	1	0.437882	1	5.26518		FALSE	FALSE	FALSE
SPAC750.02c	transmembrane transporter (predicted)	GO:0015318	inorganic molecular entity transmembrane transporter activity	MF	1	0.386965	1	5.39602		FALSE	FALSE	FALSE
SPAC750.02c	transmembrane transporter (predicted)	GO:0008324	cation transmembrane transporter activity	MF	1	0.615071	1	5.72393		FALSE	FALSE	FALSE
SPAC1F7.12	aldose reductase ARK13 family YakC, implicated in cellular detoxification from family members	GO:0016614	oxidoreductase activity, acting on CH-OH group of donors	MF	1	0.397149	1	6.00665	experimental	FALSE	FALSE	TRUE
SPCC777.03c	nifs homolog, possible cysteine desulfurase	GO:0016829	lyase activity	MF	1	0.12831	1	5.93964		FALSE	FALSE	TRUE
SPBC29A10.10c	ATP-dependent RNA helicase Dbl8	GO:0140097	catalytic activity, acting on DNA	MF	1	0.452138	1	5.46271		FALSE	TRUE	FALSE
SPCC1620.04c	meiotic fizzy-related APC coactivator Fzr3	GO:0098772	molecular function regulator	MF	1	0.276986	1	5.17073	automatic	FALSE	FALSE	FALSE
SPCC1620.04c	meiotic fizzy-related APC coactivator Fzr3	GO:0030234	enzyme regulator activity	MF	1	0.228106	1	5.38532	automatic	FALSE	FALSE	FALSE
SPAC11D3.10	nifs homolog, possible cysteine desulfurase	GO:0016829	lyase activity	MF	1	0.201629	1	5.93964		FALSE	FALSE	TRUE
SPBC1709.06	tRNA dihydrouridine synthase Dus2 (predicted)	GO:0140098	catalytic activity, acting on RNA	MF	1	0.12831	1	5.02705	automatic	FALSE	TRUE	FALSE
SPBC12D12.05c	mitochondrial carrier, ATP:ADP antiporter (predicted)	GO:0008324	cation transmembrane transporter activity	MF	1	0.209776	1	5.72393		FALSE	TRUE	FALSE
SPAC688.10	DNA polymerase zeta catalytic subunit Rev3 (predicted)	GO:0140097	catalytic activity, acting on DNA	MF	1	0.439919	1	5.46271		FALSE	TRUE	FALSE
SPCC663.08c	short chain dehydrogenase, unknown specificity (predicted)	GO:0016616	oxidoreductase activity, acting on the CH-OH group of donors, NAD or NADP as acceptor	MF	1	0.268839	1	6.09998		FALSE	FALSE	FALSE
SPCC663.08c	short chain dehydrogenase, unknown specificity (predicted)	GO:0016614	oxidoreductase activity, acting on CH-OH group of donors	MF	1	0.250509	1	6.00665		FALSE	FALSE	FALSE
SPCC663.06c	short chain dehydrogenase, unknown specificity (predicted)	GO:0016616	oxidoreductase activity, acting on the CH-OH group of donors, NAD or NADP as acceptor	MF	1	0.274949	1	6.09998		FALSE	FALSE	FALSE
SPCC663.06c	short chain dehydrogenase, unknown specificity (predicted)	GO:0016614	oxidoreductase activity, acting on CH-OH group of donors	MF	1	0.260692	1	6.00665		FALSE	FALSE	FALSE
SPAC222.14c	GTP binding protein Sey1 (predicted)	GO:0017111	nucleoside-triphosphatase activity	MF	1	0.118126	1	5.2236	automatic	FALSE	FALSE	FALSE
SPAC222.14c	GTP binding protein Sey1 (predicted)	GO:0016817	hydrolase activity, acting on acid anhydrides	MF	1	0.150713	1	5.01965	automatic	FALSE	FALSE	FALSE
SPAC977.17	MIP water channel (predicted)	GO:0015318	inorganic molecular entity transmembrane transporter activity	MF	1	0.154786	1	5.39602		FALSE	TRUE	FALSE
SPBPB10D8.07c	transmembrane transporter (predicted)	GO:0008324	cation transmembrane transporter activity	MF	1	0.126273	1	5.72393		FALSE	FALSE	FALSE
SPBPB10D8.07c	transmembrane transporter (predicted)	GO:0022890	inorganic cation transmembrane transporter activity	MF	1	0.10998	1	6.21505		FALSE	FALSE	FALSE
SPBPB10D8.07c	transmembrane transporter (predicted)	GO:0005342	organic acid transmembrane transporter activity	MF	1	0.164969	1	6.25232		FALSE	FALSE	FALSE
SPBPB10D8.07c	transmembrane transporter (predicted)	GO:0015075	ion transmembrane transporter activity	MF	1	0.177189	1	5.26518		FALSE	FALSE	FALSE
SPBPB10D8.07c	transmembrane transporter (predicted)	GO:0022804	active transmembrane transporter activity	MF	1	0.112016	1	6.21505		FALSE	FALSE	FALSE
SPBPB10D8.07c	transmembrane transporter (predicted)	GO:0008509	anion transmembrane transporter activity	MF	1	0.101833	1	5.93042		FALSE	FALSE	FALSE
SPBPB10D8.07c	transmembrane transporter (predicted)	GO:0008514	organic anion transmembrane transporter activity	MF	1	0.175153	1	6.06789		FALSE	FALSE	FALSE
SPBC1683.03c	transmembrane transporter (predicted)	GO:0008324	cation transmembrane transporter activity	MF	1	0.101833	1	5.72393		FALSE	FALSE	FALSE
SPBC1683.03c	transmembrane transporter (predicted)	GO:0015075	ion transmembrane transporter activity	MF	1	0.205703	1	5.26518		FALSE	FALSE	FALSE
SPCC663.09c	short chain dehydrogenase, unknown specificity (predicted)	GO:0016616	oxidoreductase activity, acting on the CH-OH group of donors, NAD or NADP as acceptor	MF	1	0.191446	1	6.09998		FALSE	FALSE	FALSE
SPCC663.09c	short chain dehydrogenase, unknown specificity (predicted)	GO:0016614	oxidoreductase activity, acting on CH-OH group of donors	MF	1	0.366599	1	6.00665		FALSE	FALSE	FALSE
SPAC1834.02	pentafunctional aromatic polypeptide Aro1 (predicted)	GO:0016829	lyase activity	MF	1	0.138493	1	5.93964	automatic	FALSE	FALSE	FALSE
SPCC24B10.20	short chain dehydrogenase, unknown specificity (predicted)	GO:0016616	oxidoreductase activity, acting on the CH-OH group of donors, NAD or NADP as acceptor	MF	1	0.338086	1	6.09998		FALSE	FALSE	FALSE
SPCC24B10.20	short chain dehydrogenase, unknown specificity (predicted)	GO:0016614	oxidoreductase activity, acting on CH-OH group of donors	MF	1	0.382892	1	6.00665		FALSE	FALSE	FALSE
SPBC1683.01	inorganic phosphate transmembrane transporter (predicted)	GO:0008324	cation transmembrane transporter activity	MF	1	0.138493	1	5.72393		FALSE	FALSE	FALSE
SPBC1683.01	inorganic phosphate transmembrane transporter (predicted)	GO:0015075	ion transmembrane transporter activity	MF	1	0.219959	1	5.26518		FALSE	FALSE	FALSE
SPBC1683.01	inorganic phosphate transmembrane transporter (predicted)	GO:0008509	anion transmembrane transporter activity	MF	1	0.150713	1	5.93042		FALSE	FALSE	FALSE
SPBC8E4.01c	inorganic phosphate transmembrane transporter (predicted)	GO:0008324	cation transmembrane transporter activity	MF	1	0.164969	1	5.72393		FALSE	FALSE	FALSE
SPBC8E4.01c	inorganic phosphate transmembrane transporter (predicted)	GO:0015075	ion transmembrane transporter activity	MF	1	0.181263	1	5.26518		FALSE	FALSE	FALSE
SPBC8E4.01c	inorganic phosphate transmembrane transporter (predicted)	GO:0008509	anion transmembrane transporter activity	MF	1	0.13442	1	5.93042		FALSE	FALSE	FALSE
SPAC23D3.12	plasma membrane inorganic phosphate transmembrane transporter (predicted)	GO:0008324	cation transmembrane transporter activity	MF	1	0.118126	1	5.72393		FALSE	FALSE	FALSE
SPAC23D3.12	plasma membrane inorganic phosphate transmembrane transporter (predicted)	GO:0015075	ion transmembrane transporter activity	MF	1	0.173116	1	5.26518		FALSE	FALSE	FALSE
SPAC23D3.12	plasma membrane inorganic phosphate transmembrane transporter (predicted)	GO:0008509	anion transmembrane transporter activity	MF	1	0.179226	1	5.93042		FALSE	FALSE	FALSE
SPBC660.10	mitochondrial translation elongation factor G Mef2 (predicted)	GO:0016462	pyrophosphatase activity	MF	1	0.279022	1	5.02334	automatic	FALSE	TRUE	FALSE
SPBC660.10	mitochondrial translation elongation factor G Mef2 (predicted)	GO:0016818	hydrolase activity, acting on acid anhydrides, in phosphorus-containing anhydrides	MF	1	0.164969	1	5.02334	automatic	FALSE	TRUE	FALSE
SPBC660.10	mitochondrial translation elongation factor G Mef2 (predicted)	GO:0017111	nucleoside-triphosphatase activity	MF	1	0.213849	1	5.2236	automatic	FALSE	TRUE	FALSE
SPBC660.10	mitochondrial translation elongation factor G Mef2 (predicted)	GO:0016817	hydrolase activity, acting on acid anhydrides	MF	1	0.272912	1	5.01965	automatic	FALSE	TRUE	FALSE
SPBC947.09	ThiJ domain protein, implicated in cellular detoxification	GO:0016829	lyase activity	MF	1	0.268839	1	5.93964		FALSE	FALSE	TRUE
SPCC777.15	tRNA dihydrouridine synthase Dus4 (predicted)	GO:0140098	catalytic activity, acting on RNA	MF	1	0.11609	1	5.02705	automatic	FALSE	TRUE	FALSE
SPAC4G8.07c	tRNA (m5U54) methyltransferase Trm2 (predicted)	GO:0140101	catalytic activity, acting on a tRNA	MF	1	0.175153	1	5.93042	automatic	FALSE	TRUE	FALSE
SPAC4G8.07c	tRNA (m5U54) methyltransferase Trm2 (predicted)	GO:0140098	catalytic activity, acting on RNA	MF	1	0.285132	1	5.02705	automatic	FALSE	TRUE	FALSE
SPAC4G8.07c	tRNA (m5U54) methyltransferase Trm2 (predicted)	GO:0008168	methyltransferase activity	MF	1	0.344196	1	5.63816	automatic	FALSE	TRUE	FALSE
SPAC4G8.07c	tRNA (m5U54) methyltransferase Trm2 (predicted)	GO:0016741	transferase activity, transferring one-carbon groups	MF	1	0.450102	1	5.56552	automatic	FALSE	TRUE	FALSE
SPAC1B3.15c	transmembrane transporter (predicted)	GO:0015075	ion transmembrane transporter activity	MF	1	0.317719	1	5.26518		FALSE	FALSE	FALSE
SPAC1B3.15c	transmembrane transporter (predicted)	GO:0015318	inorganic molecular entity transmembrane transporter activity	MF	1	0.219959	1	5.39602		FALSE	FALSE	FALSE
SPAC1B3.15c	transmembrane transporter (predicted)	GO:0008509	anion transmembrane transporter activity	MF	1	0.228106	1	5.93042		FALSE	FALSE	FALSE
SPAC1B3.15c	transmembrane transporter (predicted)	GO:0005342	organic acid transmembrane transporter activity	MF	1	0.152749	1	6.25232		FALSE	FALSE	FALSE
SPAC1B3.15c	transmembrane transporter (predicted)	GO:0008514	organic anion transmembrane transporter activity	MF	1	0.136456	1	6.06789		FALSE	FALSE	FALSE
SPAC1B3.15c	transmembrane transporter (predicted)	GO:0022890	inorganic cation transmembrane transporter activity	MF	1	0.105906	1	6.21505		FALSE	FALSE	FALSE
SPAC11D3.13	ThiJ domain protein, implicated in cellular detoxification	GO:0016829	lyase activity	MF	1	0.207739	1	5.93964		FALSE	FALSE	TRUE
SPCC417.10	dipeptide transmembrane transporter Dal5h1 (predicted)	GO:0015075	ion transmembrane transporter activity	MF	1	0.224033	1	5.26518		FALSE	TRUE	FALSE
SPCC417.10	dipeptide transmembrane transporter Dal5h1 (predicted)	GO:0015318	inorganic molecular entity transmembrane transporter activity	MF	1	0.325866	1	5.39602		FALSE	TRUE	FALSE
SPCC417.10	dipeptide transmembrane transporter Dal5h1 (predicted)	GO:0008509	anion transmembrane transporter activity	MF	1	0.179226	1	5.93042		FALSE	TRUE	FALSE
SPCC417.10	dipeptide transmembrane transporter Dal5h1 (predicted)	GO:0005342	organic acid transmembrane transporter activity	MF	1	0.173116	1	6.25232		FALSE	TRUE	FALSE
SPCC417.10	dipeptide transmembrane transporter Dal5h1 (predicted)	GO:0008514	organic anion transmembrane transporter activity	MF	1	0.232179	1	6.06789		FALSE	TRUE	FALSE
SPAC23C4.14	mannosyltransferase complex subunit Alg1 (predicted)	GO:0016758	transferase activity, transferring hexosyl groups	MF	1	0.470468	1	6.27796	automatic	FALSE	TRUE	FALSE
SPAC23C4.14	mannosyltransferase complex subunit Alg1 (predicted)	GO:0016757	transferase activity, transferring glycosyl groups	MF	1	0.417515	1	6.00665	automatic	FALSE	TRUE	FALSE
SPCC757.13	dipeptide transmembrane transporter (predicted)	GO:0015075	ion transmembrane transporter activity	MF	1	0.199593	1	5.26518		FALSE	TRUE	FALSE
SPCC757.13	dipeptide transmembrane transporter (predicted)	GO:0015318	inorganic molecular entity transmembrane transporter activity	MF	1	0.270876	1	5.39602		FALSE	TRUE	FALSE
SPCC757.13	dipeptide transmembrane transporter (predicted)	GO:0008509	anion transmembrane transporter activity	MF	1	0.164969	1	5.93042		FALSE	TRUE	FALSE
SPCC757.13	dipeptide transmembrane transporter (predicted)	GO:0005342	organic acid transmembrane transporter activity	MF	1	0.179226	1	6.25232		FALSE	TRUE	FALSE
SPCC757.13	dipeptide transmembrane transporter (predicted)	GO:0008514	organic anion transmembrane transporter activity	MF	1	0.10387	1	6.06789		FALSE	TRUE	FALSE
SPBC1773.15	dipeptide transmembrane transporter Dal5h2 (predicted)	GO:0015075	ion transmembrane transporter activity	MF	1	0.207739	1	5.26518		FALSE	TRUE	FALSE
SPBC1773.15	dipeptide transmembrane transporter Dal5h2 (predicted)	GO:0015318	inorganic molecular entity transmembrane transporter activity	MF	1	0.136456	1	5.39602		FALSE	TRUE	FALSE
SPBC1773.15	dipeptide transmembrane transporter Dal5h2 (predicted)	GO:0008509	anion transmembrane transporter activity	MF	1	0.150713	1	5.93042		FALSE	TRUE	FALSE
SPBC1773.15	dipeptide transmembrane transporter Dal5h2 (predicted)	GO:0005342	organic acid transmembrane transporter activity	MF	1	0.217923	1	6.25232		FALSE	TRUE	FALSE
SPBC1773.15	dipeptide transmembrane transporter Dal5h2 (predicted)	GO:0008514	organic anion transmembrane transporter activity	MF	1	0.14664	1	6.06789		FALSE	TRUE	FALSE
SPBC460.05	transmembrane transporter (predicted)	GO:0015075	ion transmembrane transporter activity	MF	1	0.197556	1	5.26518		FALSE	TRUE	FALSE
SPBC460.05	transmembrane transporter (predicted)	GO:0015318	inorganic molecular entity transmembrane transporter activity	MF	1	0.293279	1	5.39602		FALSE	TRUE	FALSE
SPBC460.05	transmembrane transporter (predicted)	GO:0008509	anion transmembrane transporter activity	MF	1	0.160896	1	5.93042		FALSE	TRUE	FALSE
SPBC460.05	transmembrane transporter (predicted)	GO:0005342	organic acid transmembrane transporter activity	MF	1	0.138493	1	6.25232		FALSE	TRUE	FALSE
SPBC460.05	transmembrane transporter (predicted)	GO:0008514	organic anion transmembrane transporter activity	MF	1	0.132383	1	6.06789		FALSE	TRUE	FALSE
SPBC1347.07	RNA exonuclease (predicted)	GO:0004518	nuclease activity	MF	1	0.156823	1	5.69451	automatic	FALSE	TRUE	FALSE
SPAC22A12.01c	DNA 5' exonuclease (predicted)	GO:0140097	catalytic activity, acting on DNA	MF	1	0.126273	1	5.46271		FALSE	TRUE	FALSE
SPAC1782.08c	exonuclease Rex3 (predicted)	GO:0140098	catalytic activity, acting on RNA	MF	1	0.435845	1	5.02705		FALSE	TRUE	FALSE
SPAC26H5.09c	oxidoreductase involved in NADPH regeneration (predicted)	GO:0016616	oxidoreductase activity, acting on the CH-OH group of donors, NAD or NADP as acceptor	MF	1	0.136456	1	6.09998		FALSE	TRUE	FALSE
SPAC26H5.09c	oxidoreductase involved in NADPH regeneration (predicted)	GO:0016614	oxidoreductase activity, acting on CH-OH group of donors	MF	1	0.338086	1	6.00665		FALSE	TRUE	FALSE
SPAC1687.01	DNA-directed RNA polymerase I and III subunit Rpc19	GO:0140098	catalytic activity, acting on RNA	MF	1	0.313646	1	5.02705		FALSE	TRUE	FALSE
SPAC521.04c	ER membrane calcium trnamembrane transporter (predicted)	GO:0015318	inorganic molecular entity transmembrane transporter activity	MF	1	0.230143	1	5.39602		FALSE	FALSE	FALSE
SPAC521.04c	ER membrane calcium trnamembrane transporter (predicted)	GO:0008324	cation transmembrane transporter activity	MF	1	0.158859	1	5.72393	curated	FALSE	FALSE	FALSE
SPCC830.09c	RNase P and RNase MRP subunit Pop5	GO:0140098	catalytic activity, acting on RNA	MF	1	0.152749	1	5.02705		FALSE	TRUE	FALSE
SPAC26A3.10	centaurin ADP ribosylation factor GTPase activating protein family (predicted)	GO:0008289	lipid binding	MF	1	0.289206	1	6.27796		FALSE	TRUE	FALSE
SPCC297.03	Ca2+/calmodulin-dependent (CaMMK)-like protein kinase Ssp1	GO:0098772	molecular function regulator	MF	1	0.10998	1	5.17073		FALSE	TRUE	FALSE
SPAC13G7.10	transcription factor Teb1	GO:0043565	sequence-specific DNA binding	MF	1	0.148676	1	5.25113	experimental	FALSE	TRUE	FALSE
SPAC19G12.15c	trehalose-6-phosphate phosphatase Tpp1	GO:0016758	transferase activity, transferring hexosyl groups	MF	1	0.405295	1	6.27796		FALSE	FALSE	FALSE
SPAC19G12.15c	trehalose-6-phosphate phosphatase Tpp1	GO:0016757	transferase activity, transferring glycosyl groups	MF	1	0.415479	1	6.00665		FALSE	FALSE	FALSE
SPAC3C7.04	transcription factor (predicted)	GO:0003700	DNA-binding transcription factor activity	MF	1	0.264766	1	5.08443		FALSE	FALSE	FALSE
SPAC22F3.02	transcription factor Atf31	GO:0003700	DNA-binding transcription factor activity	MF	1	0.187373	1	5.08443		FALSE	FALSE	FALSE
SPBC1773.12	transcription factor, zf-fungal binuclear cluster type (predicted)	GO:0003700	DNA-binding transcription factor activity	MF	1	0.252546	1	5.08443		FALSE	FALSE	FALSE
SPAC1399.01c	nucleobase transmembrane transporter (predicted)	GO:0015075	ion transmembrane transporter activity	MF	1	0.150713	1	5.26518		FALSE	TRUE	FALSE
SPAC1399.01c	nucleobase transmembrane transporter (predicted)	GO:0008324	cation transmembrane transporter activity	MF	1	0.112016	1	5.72393		FALSE	TRUE	FALSE
SPCC285.05	purine nucleoside transmembrane transporter (predicted)	GO:0015318	inorganic molecular entity transmembrane transporter activity	MF	1	0.1222	1	5.39602		FALSE	FALSE	FALSE
SPCC285.05	purine nucleoside transmembrane transporter (predicted)	GO:0008324	cation transmembrane transporter activity	MF	1	0.124236	1	5.72393		FALSE	FALSE	FALSE
SPCC285.05	purine nucleoside transmembrane transporter (predicted)	GO:0015075	ion transmembrane transporter activity	MF	1	0.228106	1	5.26518		FALSE	FALSE	FALSE
SPAC22F8.05	alpha,alpha-trehalose-phosphate synthase (predicted)	GO:0042578	phosphoric ester hydrolase activity	MF	1	0.197556	1	5.39602		FALSE	FALSE	FALSE
SPAC22F8.05	alpha,alpha-trehalose-phosphate synthase (predicted)	GO:0016791	phosphatase activity	MF	1	0.213849	1	5.48597		FALSE	FALSE	FALSE
SPAC869.03c	plasma membrane urea transmembrane transporter (predicted)	GO:0015075	ion transmembrane transporter activity	MF	1	0.264766	1	5.26518		FALSE	FALSE	FALSE
SPBPB8B6.02c	plasma membrane urea transmembrane transporter (predicted)	GO:0015075	ion transmembrane transporter activity	MF	1	0.191446	1	5.26518		FALSE	FALSE	FALSE
SPBPB8B6.02c	plasma membrane urea transmembrane transporter (predicted)	GO:0008324	cation transmembrane transporter activity	MF	1	0.105906	1	5.72393		FALSE	FALSE	FALSE
SPCC338.15	dolichyl-di-phosphooligosaccharide-protein glycotransferase subunit Wbp1 (predicted)	GO:0016757	transferase activity, transferring glycosyl groups	MF	1	0.101833	1	6.00665		FALSE	TRUE	FALSE
SPAC7D4.05	HAD superfamily hydrolase, unknown role	GO:0016791	phosphatase activity	MF	1	0.130346	1	5.48597	curated	TRUE	TRUE	TRUE
SPAC17G8.01c	tRNA ligase Trl1 (predicted)	GO:0140098	catalytic activity, acting on RNA	MF	1	0.130346	1	5.02705	automatic	FALSE	FALSE	FALSE
SPBC12C2.02c	Rictor homolog, Ste20	GO:0098772	molecular function regulator	MF	1	0.107943	1	5.17073		FALSE	TRUE	FALSE
SPBC1773.16c	transcription factor, zf-fungal binuclear cluster type(predicted)	GO:0003700	DNA-binding transcription factor activity	MF	1	0.179226	1	5.08443		FALSE	FALSE	FALSE
SPBC16C6.09	protein O-mannosyltransferase Ogm4	GO:0016758	transferase activity, transferring hexosyl groups	MF	1	0.403259	1	6.27796	automatic	FALSE	TRUE	FALSE
SPBC16C6.09	protein O-mannosyltransferase Ogm4	GO:0016757	transferase activity, transferring glycosyl groups	MF	1	0.376782	1	6.00665	automatic	FALSE	TRUE	FALSE
SPCC550.04c	pig-C (predicted)	GO:0016758	transferase activity, transferring hexosyl groups	MF	1	0.468432	1	6.27796		FALSE	TRUE	FALSE
SPCC550.04c	pig-C (predicted)	GO:0016757	transferase activity, transferring glycosyl groups	MF	1	0.366599	1	6.00665		FALSE	TRUE	FALSE
SPAC2C4.17c	MS ion channel protein 2 (predicted)	GO:0008324	cation transmembrane transporter activity	MF	1	0.193483	1	5.72393		FALSE	FALSE	FALSE
SPAC2C4.17c	MS ion channel protein 2 (predicted)	GO:0022890	inorganic cation transmembrane transporter activity	MF	1	0.179226	1	6.21505		FALSE	FALSE	FALSE
SPBC409.18	diacylglycerol diphosphate phosphatase (predicted)	GO:0016791	phosphatase activity	MF	1	0.112016	1	5.48597	automatic	FALSE	TRUE	FALSE
SPCC1795.02c	vacuolar proton/calcium exchanger (predicted)	GO:0022890	inorganic cation transmembrane transporter activity	MF	1	0.12831	1	6.21505	automatic	FALSE	FALSE	FALSE
SPCC1795.02c	vacuolar proton/calcium exchanger (predicted)	GO:0015075	ion transmembrane transporter activity	MF	1	0.213849	1	5.26518	automatic	FALSE	FALSE	FALSE
SPCC1795.02c	vacuolar proton/calcium exchanger (predicted)	GO:0015318	inorganic molecular entity transmembrane transporter activity	MF	1	0.181263	1	5.39602	automatic	FALSE	FALSE	FALSE
SPCC1795.02c	vacuolar proton/calcium exchanger (predicted)	GO:0008324	cation transmembrane transporter activity	MF	1	0.101833	1	5.72393	automatic	FALSE	FALSE	FALSE
SPAC12G12.16c	Fen1 family nuclease, XP-G family (predicted)	GO:0004518	nuclease activity	MF	1	0.118126	1	5.69451	curated	FALSE	TRUE	FALSE
SPAC12G12.16c	Fen1 family nuclease, XP-G family (predicted)	GO:0140097	catalytic activity, acting on DNA	MF	1	0.450102	1	5.46271		FALSE	TRUE	FALSE
SPAC694.06c	claspin, Mrc1	GO:0003690	double-stranded DNA binding	MF	1	0.105906	1	5.30365	experimental	FALSE	TRUE	FALSE
SPBC1198.01	glutathione-dependent formaldehyde dehydrogenase Fmd2	GO:0016614	oxidoreductase activity, acting on CH-OH group of donors	MF	1	0.352342	1	6.00665		FALSE	FALSE	FALSE
SPAC4G9.20c	mitochondrial carrier, glutamate/glycine (predicted)	GO:0022890	inorganic cation transmembrane transporter activity	MF	1	0.101833	1	6.21505		FALSE	TRUE	FALSE
SPBC21B10.11	dolichol-phosphate mannosyltransferase regulatory subunit Dpm2 (predicted)	GO:0016758	transferase activity, transferring hexosyl groups	MF	1	0.334012	1	6.27796		FALSE	TRUE	FALSE
SPBC21B10.11	dolichol-phosphate mannosyltransferase regulatory subunit Dpm2 (predicted)	GO:0016757	transferase activity, transferring glycosyl groups	MF	1	0.228106	1	6.00665		FALSE	TRUE	FALSE
SPAC977.03	methyltransferase (predicted)	GO:0008757	S-adenosylmethionine-dependent methyltransferase activity	MF	1	0.171079	1	5.90327		FALSE	FALSE	TRUE
SPAC977.03	methyltransferase (predicted)	GO:0008168	methyltransferase activity	MF	1	0.372709	1	5.63816	curated	FALSE	FALSE	TRUE
SPCC70.08c	methyltransferase (predicted)	GO:0008168	methyltransferase activity	MF	1	0.763747	1	5.63816	curated	FALSE	FALSE	TRUE
SPCC70.08c	methyltransferase (predicted)	GO:0008757	S-adenosylmethionine-dependent methyltransferase activity	MF	1	0.619145	1	5.90327		FALSE	FALSE	TRUE
SPAC57A7.09	ubiquitin-protein ligase E3, human RNF13 family homolog, unknown biological role	GO:0004842	ubiquitin-protein transferase activity	MF	1	0.979633	1	6.04706		TRUE	TRUE	TRUE
SPBC215.08c	arginine specific carbamoyl-phosphate synthase Arg4	GO:0016874	ligase activity	MF	1	0.417515	0.929293	5.85108		FALSE	TRUE	FALSE
SPAP7G5.06	plasma membrane amino acid transmembrane transporter Per1	GO:0046942	carboxylic acid transport	BP	1	0.435845	0.89899	6.11091		FALSE	TRUE	FALSE
SPAP7G5.06	plasma membrane amino acid transmembrane transporter Per1	GO:0015711	organic anion transport	BP	1	0.606925	0.89899	5.69451		FALSE	TRUE	FALSE
SPAP7G5.06	plasma membrane amino acid transmembrane transporter Per1	GO:0006820	anion transport	BP	1	0.441955	0.89899	5.55286		FALSE	TRUE	FALSE
SPAP7G5.06	plasma membrane amino acid transmembrane transporter Per1	GO:0015849	organic acid transport	BP	1	0.606925	0.89899	6.11091		FALSE	TRUE	FALSE
SPBC31E1.06	GTP binding protein Bms1 (predicted)	GO:0006364	rRNA processing	BP	1	0.419552	0.888889	5.35391	curated	FALSE	TRUE	FALSE
SPBC1D7.02c	transcription factor Scr1	GO:0044212	transcription regulatory region sequence-specific DNA binding	MF	1	0.608961	0.858586	10.6218		FALSE	FALSE	FALSE
SPBC1D7.02c	transcription factor Scr1	GO:0001067	regulatory region nucleic acid binding	MF	1	0.739308	0.858586	5.70911		FALSE	FALSE	FALSE
SPBC119.05c	Wiskott-Aldrich syndrome homolog binding protein Lsb1 (predicted)	GO:0008092	cytoskeletal protein binding	MF	1	0.352342	0.828283	6.12196		FALSE	TRUE	FALSE
SPBC1734.08	STAM like protein Hse1	GO:0008092	cytoskeletal protein binding	MF	1	0.360489	0.828283	6.12196		FALSE	TRUE	FALSE
SPAC869.10c	plasma membrane proline transmembrane transporter Put4 (predicted)	GO:0046942	carboxylic acid transport	BP	1	0.281059	0.818182	6.11091	curated	FALSE	TRUE	FALSE
SPAC869.10c	plasma membrane proline transmembrane transporter Put4 (predicted)	GO:0015711	organic anion transport	BP	1	0.574338	0.818182	5.69451	curated	FALSE	TRUE	FALSE
SPAC869.10c	plasma membrane proline transmembrane transporter Put4 (predicted)	GO:0006820	anion transport	BP	1	0.425662	0.818182	5.55286	curated	FALSE	TRUE	FALSE
SPAC869.10c	plasma membrane proline transmembrane transporter Put4 (predicted)	GO:0015849	organic acid transport	BP	1	0.592668	0.818182	6.11091	curated	FALSE	TRUE	FALSE
SPBC119.14	Rad22 homolog Rti1	GO:0006281	DNA repair	BP	1	0.232179	0.818182	5.09234	curated	FALSE	TRUE	FALSE
SPAC1006.06	RhoGEF Rgf2	GO:0044087	regulation of cellular component biogenesis	BP	1	0.252546	0.79798	5.45128		FALSE	TRUE	FALSE
SPCC320.04c	ERMES complex GTPase subunit Gem1 (predicted)	GO:0007005	mitochondrion organization	BP	1	0.242363	0.79798	6.09998	automatic	FALSE	TRUE	FALSE
SPAC4G8.13c	calcineurin responsive transcription factor Prz1	GO:1902680	positive regulation of RNA biosynthetic process	BP	1	0.228106	0.79798	5.19242	experimental	FALSE	FALSE	FALSE
SPAC4G8.13c	calcineurin responsive transcription factor Prz1	GO:0031328	positive regulation of cellular biosynthetic process	BP	1	0.226069	0.79798	5.01596	experimental	FALSE	FALSE	FALSE
SPAC4G8.13c	calcineurin responsive transcription factor Prz1	GO:0010628	positive regulation of gene expression	BP	1	0.230143	0.79798	5.10031	experimental	FALSE	FALSE	FALSE
SPAC4G8.13c	calcineurin responsive transcription factor Prz1	GO:0051254	positive regulation of RNA metabolic process	BP	1	0.213849	0.79798	5.17073	experimental	FALSE	FALSE	FALSE
SPAC4G8.13c	calcineurin responsive transcription factor Prz1	GO:0010557	positive regulation of macromolecule biosynthetic process	BP	1	0.207739	0.79798	5.04961	experimental	FALSE	FALSE	FALSE
SPAC4G8.13c	calcineurin responsive transcription factor Prz1	GO:0009891	positive regulation of biosynthetic process	BP	1	0.252546	0.79798	5.01596	experimental	FALSE	FALSE	FALSE
SPAC25B8.19c	transcription factor zf-C2H2 type	GO:0045893	positive regulation of transcription, DNA-templated	BP	1	0.317719	0.79798	5.2236		FALSE	FALSE	FALSE
SPAC25B8.19c	transcription factor zf-C2H2 type	GO:0031328	positive regulation of cellular biosynthetic process	BP	1	0.313646	0.79798	5.01596		FALSE	FALSE	FALSE
SPAC25B8.19c	transcription factor zf-C2H2 type	GO:0010628	positive regulation of gene expression	BP	1	0.250509	0.79798	5.10031		FALSE	FALSE	FALSE
SPAC25B8.19c	transcription factor zf-C2H2 type	GO:0010557	positive regulation of macromolecule biosynthetic process	BP	1	0.246436	0.79798	5.04961		FALSE	FALSE	FALSE
SPAC25B8.19c	transcription factor zf-C2H2 type	GO:0009891	positive regulation of biosynthetic process	BP	1	0.276986	0.79798	5.01596		FALSE	FALSE	FALSE
SPBP4H10.09	transcription factor Rsv1	GO:0045893	positive regulation of transcription, DNA-templated	BP	1	0.264766	0.79798	5.2236		FALSE	FALSE	FALSE
SPBP4H10.09	transcription factor Rsv1	GO:1902680	positive regulation of RNA biosynthetic process	BP	1	0.256619	0.79798	5.19242		FALSE	FALSE	FALSE
SPBP4H10.09	transcription factor Rsv1	GO:0031328	positive regulation of cellular biosynthetic process	BP	1	0.238289	0.79798	5.01596		FALSE	FALSE	FALSE
SPBP4H10.09	transcription factor Rsv1	GO:0010628	positive regulation of gene expression	BP	1	0.219959	0.79798	5.10031		FALSE	FALSE	FALSE
SPBP4H10.09	transcription factor Rsv1	GO:0045935	positive regulation of nucleobase-containing compound metabolic process	BP	1	0.258656	0.79798	5.01229		FALSE	FALSE	FALSE
SPBP4H10.09	transcription factor Rsv1	GO:1903508	positive regulation of nucleic acid-templated transcription	BP	1	0.293279	0.79798	5.19682		FALSE	FALSE	FALSE
SPBP4H10.09	transcription factor Rsv1	GO:0010557	positive regulation of macromolecule biosynthetic process	BP	1	0.236253	0.79798	5.04961		FALSE	FALSE	FALSE
SPBP4H10.09	transcription factor Rsv1	GO:0009891	positive regulation of biosynthetic process	BP	1	0.230143	0.79798	5.01596		FALSE	FALSE	FALSE
SPCC4G3.12c	ubiquitin-protein ligase E3 (predicted)	GO:0070647	protein modification by small protein conjugation or removal	BP	1	0.246436	0.79798	5.28905	curated	TRUE	TRUE	TRUE
SPBC56F2.07c	ribosome biogenesis factor recycling AAA family ATPase (predicted)	GO:0016887	ATPase activity	MF	1	0.321792	0.79798	5.61113	curated	FALSE	TRUE	FALSE
SPACUNK4.13c	mitochondrial NTPase Obg family, human OLA1 ortholog, implicated in mitochondrial translation, ribosome assembly, or tRNA metabolism (predicted)	GO:0017111	nucleoside-triphosphatase activity	MF	1	0.423625	0.79798	5.2236	curated	TRUE	TRUE	TRUE
SPBC4F6.17c	mitochondrial heatshock protein Hsp78 (predicted)	GO:0016887	ATPase activity	MF	1	0.279022	0.767677	5.61113	curated	FALSE	TRUE	FALSE
SPAC27E2.01	alpha-amylase homolog (predicted)	GO:0005975	carbohydrate metabolic process	BP	1	0.340122	0.747475	5.57191		FALSE	FALSE	FALSE
SPAC23D3.14c	alpha-amylase homolog Aah2 (predicted)	GO:0005975	carbohydrate metabolic process	BP	1	0.311609	0.747475	5.57191		FALSE	FALSE	FALSE
SPCC757.12	alpha-amylase homolog (predicted)	GO:0005975	carbohydrate metabolic process	BP	1	0.415479	0.747475	5.57191		FALSE	FALSE	FALSE
SPAC25H1.09	alpha-amylase homolog Mde5	GO:0005975	carbohydrate metabolic process	BP	1	0.558045	0.747475	5.57191		FALSE	FALSE	FALSE
SPCC63.02c	alpha-amylase homolog Aah3	GO:0005975	carbohydrate metabolic process	BP	1	0.305499	0.747475	5.57191		FALSE	FALSE	FALSE
SPCC1393.08	transcription factor, zf-GATA type	GO:0045892	negative regulation of transcription, DNA-templated	BP	1	0.329939	0.747475	5.42327		FALSE	FALSE	FALSE
SPCC1393.08	transcription factor, zf-GATA type	GO:1902679	negative regulation of RNA biosynthetic process	BP	1	0.334012	0.747475	5.42327		FALSE	FALSE	FALSE
SPCC1393.08	transcription factor, zf-GATA type	GO:2000113	negative regulation of cellular macromolecule biosynthetic process	BP	1	0.289206	0.747475	5.10834		FALSE	FALSE	FALSE
SPCC1393.08	transcription factor, zf-GATA type	GO:0009890	negative regulation of biosynthetic process	BP	1	0.334012	0.747475	5.04204		FALSE	FALSE	FALSE
SPCC1393.08	transcription factor, zf-GATA type	GO:0045934	negative regulation of nucleobase-containing compound metabolic process	BP	1	0.370672	0.747475	5.21459		FALSE	FALSE	FALSE
SPCC1393.08	transcription factor, zf-GATA type	GO:0031327	negative regulation of cellular biosynthetic process	BP	1	0.313646	0.747475	5.04204		FALSE	FALSE	FALSE
SPCC1393.08	transcription factor, zf-GATA type	GO:0010558	negative regulation of macromolecule biosynthetic process	BP	1	0.372709	0.747475	5.10834		FALSE	FALSE	FALSE
SPCC1183.02	glutathione S-transferase, translational elongation factor eEF1 (predicted)	GO:0006414	translational elongation	BP	1	0.417515	0.747475	5.2236		FALSE	TRUE	FALSE
SPBC1198.01	glutathione-dependent formaldehyde dehydrogenase Fmd2	GO:0044282	small molecule catabolic process	BP	1	0.352342	0.747475	6.00665		FALSE	FALSE	FALSE
SPCC1795.05c	uridylate kinase Ura6	GO:0009117	nucleotide metabolic process	BP	1	0.474542	0.727273	5.41228	automatic	FALSE	TRUE	FALSE
SPCC1795.05c	uridylate kinase Ura6	GO:0006753	nucleoside phosphate metabolic process	BP	1	0.480652	0.727273	5.36427	automatic	FALSE	TRUE	FALSE
SPCC1795.05c	uridylate kinase Ura6	GO:1901293	nucleoside phosphate biosynthetic process	BP	1	0.380855	0.727273	5.74657	automatic	FALSE	TRUE	FALSE
SPCC1795.05c	uridylate kinase Ura6	GO:0090407	organophosphate biosynthetic process	BP	1	0.360489	0.727273	5.16218	automatic	FALSE	TRUE	FALSE
SPAC22F3.06c	mitochondrial matrix Lon protease	GO:0016462	pyrophosphatase activity	MF	1	0.329939	0.707071	5.02334	automatic	FALSE	TRUE	FALSE
SPAC22F3.06c	mitochondrial matrix Lon protease	GO:0016818	hydrolase activity, acting on acid anhydrides, in phosphorus-containing anhydrides	MF	1	0.338086	0.707071	5.02334	automatic	FALSE	TRUE	FALSE
SPBC1D7.02c	transcription factor Scr1	GO:0003700	DNA-binding transcription factor activity	MF	1	0.590631	0.707071	5.08443		FALSE	FALSE	FALSE
SPAC56E4.03	aromatic aminotransferase (predicted)	GO:0016053	organic acid biosynthetic process	BP	1	0.441955	0.666667	5.22814		FALSE	TRUE	FALSE
SPAC56E4.03	aromatic aminotransferase (predicted)	GO:0046394	carboxylic acid biosynthetic process	BP	1	0.478615	0.666667	5.22814		FALSE	TRUE	FALSE
SPAC56E4.03	aromatic aminotransferase (predicted)	GO:0008652	cellular amino acid biosynthetic process	BP	1	0.501018	0.666667	5.57191		FALSE	TRUE	FALSE
SPAC56E4.03	aromatic aminotransferase (predicted)	GO:1901607	alpha-amino acid biosynthetic process	BP	1	0.476578	0.666667	5.62455		FALSE	TRUE	FALSE
SPBC4F6.06	microtubule affinity-regulating kinase Kin1	GO:0023051	regulation of signaling	BP	1	0.350305	0.666667	5.78548		FALSE	TRUE	FALSE
SPBC4F6.06	microtubule affinity-regulating kinase Kin1	GO:0010646	regulation of cell communication	BP	1	0.415479	0.666667	5.69451		FALSE	TRUE	FALSE
SPCC1235.05c	SMARCAD1 family ATP-dependent DNA helicase Fft2 (predicted)	GO:0034728	nucleosome organization	BP	1	0.346232	0.666667	6.23974		FALSE	TRUE	FALSE
SPAC11G7.02	HECT-type ubiquitin-protein ligase E3 Pub1	GO:0070647	protein modification by small protein conjugation or removal	BP	1	0.350305	0.666667	5.28905	curated	FALSE	TRUE	FALSE
SPBC21D10.12	BAR adaptor protein Hob1	GO:0098657	import into cell	BP	1	0.533605	0.666667	6.41707		FALSE	TRUE	FALSE
SPBC16E9.11c	HECT-type ubiquitin-protein ligase E3 Pub3 (predicted)	GO:0070647	protein modification by small protein conjugation or removal	BP	1	0.429735	0.666667	5.28905	curated	FALSE	TRUE	FALSE
SPCC63.12c	20S proteasome complex subunit beta 3, Pup3	GO:0030163	protein catabolic process	BP	1	0.759674	0.666667	5.38002	automatic	FALSE	TRUE	FALSE
SPCC63.12c	20S proteasome complex subunit beta 3, Pup3	GO:0010498	proteasomal protein catabolic process	BP	1	0.757637	0.666667	5.46271	automatic	FALSE	TRUE	FALSE
SPCC63.12c	20S proteasome complex subunit beta 3, Pup3	GO:0043632	modification-dependent macromolecule catabolic process	BP	1	0.755601	0.666667	5.05725	automatic	FALSE	TRUE	FALSE
SPCC63.12c	20S proteasome complex subunit beta 3, Pup3	GO:0051603	proteolysis involved in cellular protein catabolic process	BP	1	0.747454	0.666667	5.17073	automatic	FALSE	TRUE	FALSE
SPCC63.12c	20S proteasome complex subunit beta 3, Pup3	GO:0019941	modification-dependent protein catabolic process	BP	1	0.720978	0.666667	5.24649	automatic	FALSE	TRUE	FALSE
SPCC63.12c	20S proteasome complex subunit beta 3, Pup3	GO:1901565	organonitrogen compound catabolic process	BP	1	0.710794	0.666667	5.06108	automatic	FALSE	TRUE	FALSE
SPCC63.12c	20S proteasome complex subunit beta 3, Pup3	GO:0006511	ubiquitin-dependent protein catabolic process	BP	1	0.767821	0.666667	5.25113	automatic	FALSE	TRUE	FALSE
SPBC1105.09	ubiquitin conjugating enzyme E2 Ubc15	GO:0043632	modification-dependent macromolecule catabolic process	BP	1	0.421589	0.666667	5.05725		FALSE	TRUE	FALSE
SPBC1105.09	ubiquitin conjugating enzyme E2 Ubc15	GO:0051603	proteolysis involved in cellular protein catabolic process	BP	1	0.370672	0.666667	5.17073		FALSE	TRUE	FALSE
SPBC1105.09	ubiquitin conjugating enzyme E2 Ubc15	GO:0019941	modification-dependent protein catabolic process	BP	1	0.407332	0.666667	5.24649		FALSE	TRUE	FALSE
SPAC20H4.04	ATP-dependent 3' to 5' DNA helicase (predicted)	GO:0006310	DNA recombination	BP	1	0.342159	0.666667	5.63816		FALSE	TRUE	FALSE
SPAC20H4.04	ATP-dependent 3' to 5' DNA helicase (predicted)	GO:0006281	DNA repair	BP	1	0.478615	0.666667	5.09234	curated	FALSE	TRUE	FALSE
SPCC1020.01c	P-type proton ATPase, P3-type Pma2	GO:0098660	inorganic ion transmembrane transport	BP	1	0.551935	0.666667	5.79345		FALSE	FALSE	FALSE
SPCC1020.01c	P-type proton ATPase, P3-type Pma2	GO:0006812	cation transport	BP	1	0.588595	0.666667	5.38532		FALSE	FALSE	FALSE
SPCC1020.01c	P-type proton ATPase, P3-type Pma2	GO:0098662	inorganic cation transmembrane transport	BP	1	0.661914	0.666667	5.93042		FALSE	FALSE	FALSE
SPCC1020.01c	P-type proton ATPase, P3-type Pma2	GO:0098655	cation transmembrane transport	BP	1	0.676171	0.666667	5.46271		FALSE	FALSE	FALSE
SPAC6G9.11	SNAP receptor, synaptobrevin family	GO:0048193	Golgi vesicle transport	BP	1	0.574338	0.666667	5.60449		FALSE	TRUE	FALSE
SPBC13G1.11	SNARE Ykt6 (predicted)	GO:0048193	Golgi vesicle transport	BP	1	0.431772	0.666667	5.60449		FALSE	TRUE	FALSE
SPBC16A3.13	alpha-amylase homolog Aah4	GO:0005975	carbohydrate metabolic process	BP	1	0.560081	0.666667	5.57191		FALSE	FALSE	FALSE
SPAC3H1.11	transcription factor Hsr1	GO:0009891	positive regulation of biosynthetic process	BP	1	0.358452	0.666667	5.01596		FALSE	FALSE	FALSE
SPBC18E5.02c	serine palmitoyltransferase complex subunit (predicted)	GO:0016747	transferase activity, transferring acyl groups other than amino-acyl groups	MF	1	0.344196	0.666667	5.90327		FALSE	TRUE	FALSE
SPBC651.01c	ribosome export GTP binding protein Nog1 (predicted)	GO:0016462	pyrophosphatase activity	MF	1	0.405295	0.666667	5.02334		FALSE	TRUE	FALSE
SPBC651.01c	ribosome export GTP binding protein Nog1 (predicted)	GO:0016818	hydrolase activity, acting on acid anhydrides, in phosphorus-containing anhydrides	MF	1	0.419552	0.666667	5.02334		FALSE	TRUE	FALSE
SPBC651.01c	ribosome export GTP binding protein Nog1 (predicted)	GO:0016817	hydrolase activity, acting on acid anhydrides	MF	1	0.446029	0.666667	5.01965		FALSE	TRUE	FALSE
SPBC1198.01	glutathione-dependent formaldehyde dehydrogenase Fmd2	GO:0016616	oxidoreductase activity, acting on the CH-OH group of donors, NAD or NADP as acceptor	MF	1	0.378819	0.666667	6.09998		FALSE	FALSE	FALSE
SPAC17G8.13c	histone acetyltransferase Mst2	GO:0018205	peptidyl-lysine modification	BP	1	0.354379	0.646465	6.05742	curated	FALSE	TRUE	FALSE
SPBC4F6.15c	DNA repair endonuclease non-catalytic subunit Swi10	GO:0006281	DNA repair	BP	1	0.566191	0.616162	5.09234	experimental	FALSE	TRUE	FALSE
SPAC1142.08	forkhead transcription factor Fhl1	GO:0003700	DNA-binding transcription factor activity	MF	1	0.513238	0.59596	5.08443		FALSE	FALSE	FALSE
SPBC1198.04c	transcription regulator Zas1	GO:0003700	DNA-binding transcription factor activity	MF	1	0.431772	0.59596	5.08443		FALSE	FALSE	FALSE
SPAC13A11.02c	sterol 14-demethylase Erg11	GO:0006629	lipid metabolic process	BP	1	0.674134	0.565657	5.00137	experimental	FALSE	TRUE	FALSE
SPAC13A11.02c	sterol 14-demethylase Erg11	GO:1901615	organic hydroxy compound metabolic process	BP	1	0.513238	0.565657	5.97738	experimental	FALSE	TRUE	FALSE
SPAC13A11.02c	sterol 14-demethylase Erg11	GO:0044255	cellular lipid metabolic process	BP	1	0.580448	0.565657	5.03078	experimental	FALSE	TRUE	FALSE
SPAC13A11.02c	sterol 14-demethylase Erg11	GO:0006066	alcohol metabolic process	BP	1	0.468432	0.565657	6.35909	experimental	FALSE	TRUE	FALSE
SPAC13A11.02c	sterol 14-demethylase Erg11	GO:1901617	organic hydroxy compound biosynthetic process	BP	1	0.558045	0.565657	6.3451	experimental	FALSE	TRUE	FALSE
SPAC13A11.02c	sterol 14-demethylase Erg11	GO:0008610	lipid biosynthetic process	BP	1	0.586558	0.565657	5.40683	experimental	FALSE	TRUE	FALSE
SPBC359.05	ABC transmembrane transporter Abc3	GO:0022804	active transmembrane transporter activity	MF	1	0.494908	0.565657	6.21505	automatic	FALSE	TRUE	FALSE
SPAC1565.08	AAA family ATPase involved in ubiquitin-mediated protein degradation Cdc48	GO:0016887	ATPase activity	MF	1	0.482688	0.565657	5.61113	curated	FALSE	TRUE	FALSE
SPBC1D7.02c	transcription factor Scr1	GO:0003690	double-stranded DNA binding	MF	1	0.545825	0.565657	5.30365		FALSE	FALSE	FALSE
SPAC323.02c	20S proteasome complex subunit alpha 5, Pup2	GO:0030163	protein catabolic process	BP	1	0.731161	0.494949	5.38002	automatic	FALSE	TRUE	FALSE
SPAC323.02c	20S proteasome complex subunit alpha 5, Pup2	GO:0010498	proteasomal protein catabolic process	BP	1	0.857434	0.494949	5.46271	automatic	FALSE	TRUE	FALSE
SPAC323.02c	20S proteasome complex subunit alpha 5, Pup2	GO:0043632	modification-dependent macromolecule catabolic process	BP	1	0.822811	0.494949	5.05725	automatic	FALSE	TRUE	FALSE
SPAC323.02c	20S proteasome complex subunit alpha 5, Pup2	GO:0051603	proteolysis involved in cellular protein catabolic process	BP	1	0.763747	0.494949	5.17073	automatic	FALSE	TRUE	FALSE
SPAC323.02c	20S proteasome complex subunit alpha 5, Pup2	GO:0019941	modification-dependent protein catabolic process	BP	1	0.802444	0.494949	5.24649	automatic	FALSE	TRUE	FALSE
SPAC323.02c	20S proteasome complex subunit alpha 5, Pup2	GO:1901565	organonitrogen compound catabolic process	BP	1	0.775967	0.494949	5.06108	automatic	FALSE	TRUE	FALSE
SPAC323.02c	20S proteasome complex subunit alpha 5, Pup2	GO:0006511	ubiquitin-dependent protein catabolic process	BP	1	0.800407	0.494949	5.25113	automatic	FALSE	TRUE	FALSE
SPAC2C4.14c	PAK-related GC kinase Ppk11	GO:0090068	positive regulation of cell cycle process	BP	1	0.505092	0.494949	5.35391		FALSE	TRUE	FALSE
SPAC2C4.14c	PAK-related GC kinase Ppk11	GO:0035556	intracellular signal transduction	BP	1	0.580448	0.494949	5.19242		FALSE	TRUE	FALSE
SPAC3G6.01	ATP-dependent DNA helicase Hrp3	GO:0006338	chromatin remodeling	BP	1	0.627291	0.494949	5.1246	experimental	FALSE	TRUE	FALSE
SPAC31A2.07c	ATP-dependent RNA helicase Dbp10 (predicted)	GO:0016072	rRNA metabolic process	BP	1	0.716904	0.494949	5.21012		FALSE	TRUE	FALSE
SPBC4.07c	19S proteasome base subcomplex ATPase subunit Rpt2	GO:0006511	ubiquitin-dependent protein catabolic process	BP	1	0.745418	0.494949	5.25113		FALSE	TRUE	FALSE
SPBC4.07c	19S proteasome base subcomplex ATPase subunit Rpt2	GO:0043632	modification-dependent macromolecule catabolic process	BP	1	0.759674	0.494949	5.05725		FALSE	TRUE	FALSE
SPBC4.07c	19S proteasome base subcomplex ATPase subunit Rpt2	GO:0019941	modification-dependent protein catabolic process	BP	1	0.712831	0.494949	5.24649		FALSE	TRUE	FALSE
SPBC106.01	dual specificity protein kinase Mph1	GO:0010948	negative regulation of cell cycle process	BP	1	0.551935	0.494949	5.3335	experimental	FALSE	TRUE	FALSE
SPBC106.01	dual specificity protein kinase Mph1	GO:1901990	regulation of mitotic cell cycle phase transition	BP	1	0.558045	0.494949	5.06494	experimental	FALSE	TRUE	FALSE
SPBC106.01	dual specificity protein kinase Mph1	GO:1901987	regulation of cell cycle phase transition	BP	1	0.543788	0.494949	5.005	experimental	FALSE	TRUE	FALSE
SPBC1539.03c	argininosuccinate lyase (predicted)	GO:1901607	alpha-amino acid biosynthetic process	BP	1	0.517312	0.494949	5.62455	automatic	FALSE	TRUE	FALSE
SPBC1539.03c	argininosuccinate lyase (predicted)	GO:0016053	organic acid biosynthetic process	BP	1	0.553971	0.494949	5.22814	automatic	FALSE	TRUE	FALSE
SPCC74.01	SNARE binding protein Sly1 (predicted)	GO:0048193	Golgi vesicle transport	BP	1	0.568228	0.494949	5.60449		FALSE	TRUE	FALSE
SPCC1322.01	mitochondrial 3'-5' exonuclease for RNA 3' ss-tail	GO:0044270	cellular nitrogen compound catabolic process	BP	1	0.558045	0.494949	5.13697		FALSE	FALSE	FALSE
[truncated: 21,397 more rows]

## Sheet: NETFF priority unstudied
gene_id	gene_description	go_id	go_name	go_namespace	probability	probability_ml	probability_caft	information_content	pombase_evidence_code	is_priority_unstudied_gene	is_conserved_in_vertebrates	is_unknown_function_gene	class
[truncated: 47 more rows]

[truncated: 11 more sheets: NETFF novel predictions, NETFF-HGOGO-HPHEPHE-BP, NETFF-HGOGO-HPHEPHE-MF, PB-HGOGO-HPHEPHE-BP, PB-HGOGO-HPHEPHE-MF, 312 selected genes, Selected predictions confirmed, 5 priority unstudied, Cytoscape clusters, Priority unknowns in Cytoscape, GOGO enrichments]
